# Supplementary material for: Genetic predisposition to lung cancer: comprehensive literature integration, meta-analysis, and multiple evidence assessment of candidate-gene association studies
Source: PubMed Central journal article supplement (PMC5567126; doi:10.1038/s41598-017-07737-0), 2017-08-21
Supplement: 41598_2017_7737_MOESM1_ESM.pdf [file 41598_2017_7737_MOESM1_ESM.pdf]

## **Supplementary Information to:**

### **Genetic predisposition to lung cancer: comprehensive literature integration, meta-analysis, and multiple evidence assessment of candidate-gene association studies**

Junjun Wang M.D.<sup>1,2#</sup>, Qingyun Liu M.D.<sup>1#</sup>, Shuai Yuan M.D.<sup>1#</sup>, Weijia Xie Ph.D.<sup>1#</sup>, Yuan Liu M.D.<sup>1</sup>, Ying Xiang M.P.H.<sup>1,2</sup>, Na Wu M.D.<sup>1,2</sup>, Long Wu M.D.<sup>1,2</sup>, Xiangyu Ma Ph.D.<sup>1,2</sup>, Tongjian Cai Ph.D.<sup>1,2</sup>, Yao Zhang Ph.D.<sup>1,2</sup>, Zhifu Sun M.D.<sup>3</sup>, Yafei Li Ph.D.<sup>1,2\*</sup>

<sup>1</sup> Department of Epidemiology, College of Preventive Medicine, Third Military Medical University, Chongqing, People's Republic of China

<sup>2</sup> Center for Clinical Epidemiology and Evidence-Based Medicine, Third Military Medical University, Chongqing, People's Republic of China

<sup>3</sup> Health Sciences Research, Mayo Clinic College of Medicine, Rochester, Minnesota, USA

#These authors contributed equally to this work.

\* **Corresponding author:** Yafei Li, Department of Epidemiology, College of Preventive Medicine, Third Military Medical University, NO.30 Gaotanyan Street, Chongqing 400038, People's Republic of China. E-mail: liyafei2008@hotmail.com.  
Telephone: +86 23 68752293. Fax: +86 23 68752293.

## Contents

### Supplementary Results

- Information of variants involved in meta-analyses
- Supplementary results of main meta-analyses
- Supplementary results of subgroup meta-analyses

### Supplementary Figures

- Figure S1.** Distribution by chromosome of 246 genetic variants available for meta-analyses.
- Figure S2.** Venn diagram of the distributions of genetic variants with significant associations with lung cancer risk in the main meta-analyses and subgroup meta-analyses by ethnicity
- Figure S3.** Venn diagram of the distributions of genetic variants with significant associations with specific histological types of lung cancer.
- Figure S4.** Venn diagram of the distributions of genetic variants with significant associations with lung adenocarcinoma and squamous cell carcinoma.
- Figure S5.** Venn diagram of the distributions of genetic variants with significant associations in subgroup meta-analyses of smoker and non-smoker.
- Figure S6.** Forest plots of main or subgroup meta-analyses for variants showed significant associations to lung cancer susceptibility with strong cumulative evidence.
- Figure S7.** Begg's funnel plots of main or subgroup meta-analyses for variants showed significant associations to lung cancer susceptibility with strong cumulative evidence.

### Supplementary Tables

- Table S1.** Genetic associations with lung cancer risk for all 246 variants analyzed in main meta-analyses under different genetic models
- Table S2.** Credibility assessment for variants with significant associations with lung cancer risk in meta-analyses for all available data
- Table S3.** Subgroup meta-analyses stratified by ethnicity for genetic variants with available data
- Table S4.** Credibility assessment for variants with significant associations with lung cancer risk in subgroup meta-analyses by ethnicity
- Table S5.** Subgroup meta-analyses stratified by different histological types of lung cancer for variants with sufficient data under different genetic models
- Table S6.** Credibility assessment for variants with significant associations with lung cancer risk in subgroup meta-analyses by histological types
- Table S7.** Subgroup meta-analyses stratified by smoking status for variants with sufficient data under different genetic models
- Table S8.** Credibility assessment for variants with significant associations with lung cancer risk in subgroup meta-analyses by smoking status
- Table S9.** Credibility assessment for variants with non-significant associations with lung cancer risk in meta-analyses for all available data

### Supplementary Literatures

- Lists of 1,018 eligible studies enrolled in this comprehensive research synopsis

## Supplementary Results

### Information of variants involved in meta-analyses

Our systematic literature search identified 1,018 eligible publications reporting 2,910 genetic variants in 754 unique genes or loci. Main meta-analyses were performed for 246 genetic variants (in 138 genes or loci) with sufficient data (**Supplementary Table S1**). All of these variants are located on autosomes, and chromosome 19 has the highest number of variants (n=47, 19%) (**Supplementary Fig. S1**). According to their population frequency, 235 of the 246 variants are common variants and 11 are rare. These variants were further classified by their potential functional effects: (1) synonymous single nucleotide polymorphisms (sSNPs, n=15); (2) non-synonymous SNPs (nsSNPs, n=90); (3) frameshift polymorphism (n=1); (4) SNPs in 3' or 5' untranslated regions (UTRs; n=40); (5) intronic SNPs (n=46); (6) intergenic SNPs (n=38); (7) SNP in a splice site (n=1); (8) one deletion/insertion variant; (9) variants with microsatellite or short tandem repeat (STR) variation (n=4); (10) variants with multi-nucleotide variation (n=2); (11) variants with a specific change in phenotype (n=4); (12) variants with copy number variation (CNV) (n=2); (13) SNPs in microRNA (n=2) (**Supplementary Table S1**).

### Supplementary results of main meta-analyses

#### *Strength of association between each genetic variant and lung cancer risk*

The strength of association between each genetic variant and lung cancer as measured by ORs had the mean of 1.36 (range 1.08-2.55) for putative "risk" variants and 0.78 (range 0.55-0.90) for putative "protective" variants. Four variants (*HIF1A* rs11549467, *HRAS1* a VNTR [variable number of tandem repeat] variation (loss of

heterozygosity in the 15p15.5 region), *UGT1A6* rs6759892, and *WWOX* CNV-67048) showed strong associations (ORs > 2) with risk of lung cancer. Eight variants (*MAPKAPK2* CNV-30450, *SFTPB* variation [a large gene variation within intron 4], *TP53* rs12951053, *BCL2* rs2279115, *CYP2A6* rs1801272 and rs5031016, *ELANE* rs351107 [-903T>G, Rep\_a], and *MMP2* rs243865) showed moderate genetic associations ("risk" ORs range 1.5-2.0, or "protective" ORs range 0.50-0.67) with lung cancer. The remaining 44 significant variants showed low associations (ORs range 0.67-1.50) with lung cancer, of note, four variants of them (*CHRNA3* rs6495309, *CYP2E1* rs6413432, *GSTM1* phenotype, and *HYKK* rs931794) showed highly significant associations ( $P < 10^{-7}$ ) with lung cancer risk (**Table 1 and Supplementary Table S2**).

#### ***Assessment of heterogeneity across studies***

In the 246 main meta-analyses, 86 (34.96%) had little or no heterogeneity ( $I^2 < 25\%$ ) and 122 (49.59%) had high heterogeneity ( $I^2 > 50\%$ ) (**Supplementary Table S1**). And among the 56 main meta-analyses with statistically significant summary ORs, 24 (42.86%) had little or no heterogeneity and 22 (39.29%) had high heterogeneity (**Table 1; Supplementary Table S2**).

#### ***Examinations for potential bias in studies enrolled in meta-analyses***

Of the 246 main meta-analyses, 21(8.54%) had evidence of substantial publication bias on the basis of the Begg's test ( $P < 0.10$ ), 11 of which had statistically significant pooled ORs ( $P \leq 0.05$ ) in main meta-analyses (**Supplementary Table S1**). Furthermore, a modified Egger's test was used to evaluate whether small studies provide different results from larger studies for all

main meta-analyses, and 30 (12.20%) had a significant test ( $P < 0.10$ ) including 11 with statistically significant pooled ORs (*BCL2* rs2279115, *CHRNA3* rs938682, *CYP1A1* rs1048943, *ELANE* rs7254054 (-741G>A, Rep\_b), *ERCC1* rs11615, *FGFR4* rs351855, *GSTM1* phenotype, *GSTP1* rs1695, *IL10* rs1800896, *MIR146A* rs2910164, and *MMP2* rs243865). To examine whether there were relative excess of formally significant findings in studies due to potential sources of bias, such as selective analyses, selective outcome reporting, and fabricated data, we performed an excess significance test. A total of 40 meta-analyses had evidence of inclusion of many individual studies reporting excess significant results (**Supplementary Table S1**). Among these 40 meta-analyses, seven had statistically significant pooled ORs with small effect sizes (mean pooled ORs 1.18, range 1.08-1.20). When the excess of significance was examined in aggregate across all studies enrolled in all main meta-analyses, there was significant evidence of existing excess significance ( $P < 10^{-8}$ ), indicating potential bias existed in these published studies. A sensitivity analysis was performed to further assess the robustness of these results (**Supplementary Table S2**). Fourteen meta-analyses lost significance after removing the initial study. Of 17 meta-analyses with statistically significant pooled ORs, three became non-significant after removal of studies showing deviations from Hardy-Weinberg equilibrium (HWE).

## **Supplementary results of subgroup meta-analyses**

### ***Subgroup meta-analyses by ethnicity***

Subgroup meta-analyses were conducted in Caucasian and Asian population under each of the three genetic models (allelic, dominant, or recessive model),

respectively (**Table 3, Supplementary Table S3**). Among those 246 genetic variants investigated in main meta-analyses, there were 86 variants with sufficient available data for subgroup analyses in Caucasian and 71 variants in Asian population (**Supplementary Table S3**). In addition, 29 variants studied only in one specific ethnic population (17 variants in Caucasians and 12 in Asians) have been evaluated previously in the main meta-analyses (**Supplementary Table S1**). Thus, a total of 103 variants were evaluated in Caucasian population and 83 variants in Asian population.

In Caucasian population, 19 (22.1%) variants significantly associated with lung cancer risk. The strength of association between each variant and lung cancer as measured by ORs had the mean of 1.39 (range 1.07-1.99) for putative "risk" variants and 0.73 (range 0.59-0.92) for putative "protective" variants. Of the 19 significant variants, one (*HRAS1* a VNTR variation) showed strong genetic association (OR > 2), five (*CYP1A2* rs762551, *SFTPB* a combination variation [combined deletion and insertion], *CYP2A6* rs1801272, *CYP2E1* rs2031920, and *ELANE* rs351107 [-903T>G, Rep\_a]) showed moderate genetic associations ("risk" ORs range 1.5-2.0, or "protective" ORs range 0.50-0.67), and the others showed low associations (ORs range 0.67-1.50) with lung cancer, including one variant (*CHRNA5* rs16969968) showed highly significant association with lung cancer risk with *P*-value at  $2.03 \times 10^{-21}$  (**Supplementary Table S4**). Of the 19 significant variants, 13 were identified from meta-analyses with little or no heterogeneity ( $I^2 < 25\%$ ), four (*CYP1A2* rs762551, *ELANE* rs351107, *ELANE* rs7254054, and *XRCC1* rs1799782) were identified from meta-analyses with moderate heterogeneity ( $25\% \leq I^2 \leq 50\%$ ), and two (*CYP1A1* rs1048943 and *HRAS1* a VNTR variation) were identified from meta-analyses with high heterogeneity. According to the examinations of potential bias (the Begg's test,

modified Egger's test, and the excess significance test), significant associations for four variants (*CYP1A1* rs4646903, *SFTPB* variation, *ELANE* rs7254054, and *CYP1A1* rs1048943) had evidence of potential bias (publication bias, small study effects, or excess significance bias) (**Supplementary Table S4**). When the initial study was excluded, the association for four variants (*ELANE* rs351107 and rs7254054, *ERCC2* rs238406, and *HRAS1* a VNTR variation) was no longer statistically significant. When studies with HWE-violating controls were excluded, the association for two variants (*ERCC2* rs238406 and *MTHFR* rs1801131) was no longer statistically significant.

In Asian population, 26 (31.3%) variants showed significant associations with lung cancer. The strength of association between each genetic variant and lung cancer as measured by ORs had the mean of 1.27 (range 1.08-1.50) for putative "risk" variants and 0.76 (range 0.64-0.91) for putative "protective" variants. Of the 26 significant variants, one (*WWOX* CNV-67048) showed strong genetic association (OR > 2), three (*MAPKAPK2* CNV-30450, *CYP2A6* non\*4/\*4, and *VEGFA* rs833061) showed moderate genetic associations ("risk" ORs range 1.5-2.0, or "protective" ORs range 0.50-0.67), and the other 22 variants showed low genetic associations (ORs range 0.67-1.50) with lung cancer (**Supplementary Table S4**). Of the 26 significant variants, 14 were identified from meta-analyses with little or no heterogeneity ( $I^2 < 25\%$ ), four (*ATM* rs189037, *CHRNA3* rs6495309, *GSTP1* rs1695, and *GSTT1* present/null) were identified from meta-analyses with moderate heterogeneity ( $25\% \leq I^2 \leq 50\%$ ), and eight (*CYP1A1* rs4646903, *CYP1A1* rs1048943, *GSTM1* present/null, *IL10* rs1800872, *MAPKAPK2* CNV-30450, *MDM2* rs2279744, *XRCC1* rs25487, and *XRCC1* rs3213245) were identified from meta-analyses with high heterogeneity. Among the 26 significant variants, two (*CYP1A1* rs4646903 and *MDM2* rs2279744)

had associations showing evidence of potential bias of small study effects and three (*CYP1A1* rs1048943, *GSTMI* present/null, and *XRCC1* rs25487) had associations showing evidence of inclusion of studies with excess of significant findings and statistically significant pooled ORs with small effect sizes (mean pooled ORs 1.23, range 1.05-1.43) (**Supplementary Table S4**). When initial study was excluded, the association for seven variants (*AGER* rs1800624, *CYP1A1* rs4646903, *FASLG* rs763110, *IL10* rs1800872, *VEGFA* rs833061, *XRCC1* rs25487 and rs3213245) was no longer significant. When studies with HWE-violating controls were excluded, the association for one variant (*XRCC1* rs25487) was no longer significant.

#### ***Subgroup meta-analyses by histological types of lung cancer***

Subgroup meta-analyses stratified by histological types of lung cancer were performed under each of the three genetic models (allelic, dominant, or recessive model) (**Supplementary Table S5**). There was sufficient data to evaluate 22 variants in small cell lung cancer [SCLC], 92 in non-small cell lung cancer [NSCLC], 48 in adenocarcinoma [AD], and 46 in squamous cell carcinoma [SCC] group, respectively.

In the SCLC subgroup, statistical significant associations were found for five variants, where three (*CHRNA5* rs16969968, *CYP1A1* rs4646903, and *NQO1* rs1800566) and two (*GSTMI* present/null and *XPC* rs2228001) showed moderate genetic associations (ORs range 1.5-2.0) and low genetic associations (ORs range 0.67-1.50) with lung cancer risk, respectively (**Supplementary Table S6**). Of these significant variants, two (*CYP1A1* rs4646903 and *XPC* rs2228001) were identified from meta-analyses with little or no heterogeneity ( $I^2 < 25\%$ ), one (*GSTMI* present/null) was identified from meta-analysis with moderate heterogeneity ( $25\% \leq$



$I^2 \leq 50\%$ ), and two (*CHRNA5* rs16969968 and *NQO1* rs1800566) were identified from meta-analyses with high heterogeneity. Based on the examinations of potential bias, one variant (*CHRNA5* rs16969968) had association with evidence of potential bias of small study effects. Based on the sensitivity analyses, the association for two variants (*NQO1* rs1800566 and *XPC* rs2228001) was no longer significant after removing the initial study.

In the NSCLC subgroup, 25 (27.2%) variants showed significant associations with lung cancer. The strength of these associations as measured by ORs had the mean of 1.37 (range 1.11-1.73) for putative "risk" variants and 0.77 (range 0.65-0.91) for putative "protective" variants. Of the 25 significant variants, five (*FAS* rs2234767, *IL17A* rs2275913, *TNF* rs1800629, *XRCC1* rs2256507, and *MMP2* rs243865) showed moderate genetic associations ("risk" ORs range 1.5-2.0, or "protective" ORs range 0.50-0.67) and 25 variants showed low genetic associations (ORs range 0.67-1.50) with lung cancer where two variants (*CHRNA5* rs16969968 and *XRCC1* rs3213245) showed highly significant associations ( $P < 10^{-7}$ ) with lung cancer risk (**Supplementary Table S6**). Of the 25 significant variants, 14 were identified from meta-analyses with little or no heterogeneity ( $I^2 < 25\%$ ), four (*ERCC2* rs13181, *IL17A* rs2275913, *OGGI* rs1052133, and *XRCC1* rs1001581) were identified from meta-analyses with moderate heterogeneity ( $25\% \leq I^2 \leq 50\%$ ), and seven (*GSTM1* present/null, *IL1B* rs1143627, *IL6* rs1800796, *MMP2* rs243865, *MPO* rs2333227, *SOD2* rs4880, and *TNF* rs1800629) were identified from meta-analyses with high heterogeneity. Based on the further examinations of potential bias, evidence of publication bias, potential bias of small study effects, inclusion of studies with excess significant findings, was found for one variant (*IL1B* rs1143627), four variants (*IL1B*

rs1143627, *IL6* rs1800796, *MMP2* rs243865, and *SOD2* rs4880), and one variant (*OGGI* rs1052133) with association of small effect size (OR 1.16, 95%CI 1.02-1.32), respectively (**Supplementary Table S6**). When initial study was excluded, association for five variants (*FAS* rs2234767, *IL1B* rs1143627, *MMP2* rs243865, *TNF* rs1800629, and *XRCCI* rs1001581) was no longer significant. When sensitivity analyses removing studies with HWE-violating controls, two variants (*ERCC2* rs13181 and *IL1B* rs1143627) became non-significant.

In the AD subgroup, 15 (31.3%) variants significantly associated with lung cancer risk. The strength of associations between each genetic variant and lung cancer as measured by ORs had the mean of 1.37 (range 1.11-1.70) for putative "risk" variants and 0.81 (range 0.71-0.93) for putative "protective" variants. Of the 15 significant variants, three (*BIRC5* rs9904341, *IL17A* rs2275913, and *XRCCI* rs3213245) showed moderate genetic associations (ORs range 1.5-2.0) and 12 variants showed low associations (ORs range 0.67-1.50) with lung cancer where one (*TERT* rs2736098) showed highly significant association ( $P = 4.97 \times 10^{-11}$ ) (**Supplementary Table S6**). Of the 15 significant variants, ten were identified from meta-analyses with little or no heterogeneity ( $I^2 < 25\%$ ), four (*CHRNA5* rs16969968, *GSTM1* present/null, *IL17A* rs2275913, and *MDM2* rs2279744) were identified from meta-analyses with moderate heterogeneity ( $25\% \leq I^2 \leq 50\%$ ), and one (*BIRC5* rs9904341) was identified from meta-analysis with high heterogeneity. Based on the examinations of potential bias, only one variant (*GSTM1* present/null) had association with evidence of potential bias of small study effect and inclusion of excess significant findings. When the initial study was excluded, the association for three variants (*MIR146A* rs2910164, *SOD2* rs4880, and *XPC* PAT-/+) was no longer

significant. When studies included HWE-violating controls were excluded, the association for two variants (*ERCC2* rs238406 and *MTHFR* rs1801131) was no longer significant.

In the SCC subgroup, statistical significant associations were found for eight variants, where three (*SOD2* rs4880, *TNF* rs1800629, and *MMP2* rs243865) and five (*CYP1A1* rs4646903 and rs1048943, *GSTM1* present/null, *TERT* rs2736098, and *CYP2E1* rs6413432) showed moderate genetic associations ("risk" ORs range 1.5-2.0, or "protective" ORs range 0.50-0.67) and low genetic associations (ORs range 0.67-1.50) with lung cancer risk, respectively (**Supplementary Table S6**). Of note, one variant (*CYP1A1* rs4646903) with association showed low strength (OR 1.45, 95%CI 1.26-1.67) but had highly statistical significant ( $P = 3.77 \times 10^{-7}$ ). Of the eight significant variants, three (*CYP1A1* rs4646903, *CYP2E1* rs6413432, and *TERT* rs2736098) were identified from meta-analyses with little or no heterogeneity ( $I^2 < 25\%$ ) and five (*CYP1A1* rs1048943, *GSTM1* present/null, *MMP2* rs243865, *SOD2* rs4880, and *TNF* rs1800629) were identified from meta-analyses with high heterogeneity. Two variants (*CYP1A1* rs1048943 and *MMP2* rs243865) had associations with evidence of potential bias of small study effects and one variant (*GSTM1* present/null) had association of small effect size (OR 1.23, 95%CI 1.08-1.40) with evidence of potential bias of inclusion of excess significant findings. Based on the sensitivity analyses, three variants (*MMP2* rs243865, *SOD2* rs4880, and *TNF* rs1800629) lost significant associations with lung cancer risk after relative meta-analysis removing the initial study.

#### ***Subgroup meta-analyses by smoking status***

Subgroup meta-analyses by smoking status were conducted separately in smokers and non-smokers under each of the three genetic models (allelic, dominant, or recessive model), if sufficient data were available. Sixty variants were evaluated in smokers and thirty-eight variants in non-smokers (**Supplementary Table S7**).

In smokers, 22 (36.7%) variants significantly associated with lung cancer. The strength of association between each genetic variant and lung cancer as measured by ORs had the mean of 1.32 (range 1.07-1.64) for putative "risk" variants and 0.74 (range 0.58-0.95) for putative "protective" variants (**Supplementary Table S8**). Of the 22 significant variants, two (*GSTP1* rs1138272 and *CYP2A6* rs5031016) showed moderate genetic associations ("risk" ORs range 1.5-2.0, or "protective" ORs range 0.50-0.67) and 20 showed low associations (ORs range 0.67-1.50) with lung cancer, including one variant (*CHRNA5* rs16969968) showed highly significant association ( $P = 2.77 \times 10^{-10}$ ). Of the 22 significant variants, 12 were identified from meta-analyses with little or no heterogeneity ( $I^2 < 25\%$ ), five (*APEX1* rs1760944, *CYP1A1* rs4646903, *SOD2* rs4880, *XRCCI* rs1799782 and rs25487) were identified from meta-analyses with moderate heterogeneity ( $25\% \leq I^2 \leq 50\%$ ), and five (*CYP1A1* rs1048943, *CYP2A6* rs5031016, *GSTM1* present/null, *GSTP1* rs1695, and *TP53* rs1042522) were identified from meta-analyses with high heterogeneity. Of the 22 significant variants, five (*CHRNA5* rs16969968, *CYP1A1* rs1048943, *GSTM1* present/null, *NAT2* rs1799930, and *XRCCI* rs25489) were identified from meta-analyses showing evidence of potential bias of small study effects and two (*CYP1A1* rs1048943 and *TP53* rs1042522) were identified from meta-analyses showing evidence of inclusion of studies with excess significant findings and having small summary ORs (OR 1.42, 95%CI 1.04-1.93, association for *CYP1A1* rs1048943;

OR 1.23, 95%CI 1.01-1.50, association for *TP53* rs1042522). When sensitivity analyses removing the initial study, 11 (*CYP1A1* rs1048943, *CYP1B1* rs1800440 and rs1056836, *CYP2A6* rs5031016, *EPHX1* rs2234922, *MTHFR* rs1801131, *SOD2* rs4880, *TP53* rs1042522, *XRCC1* rs25489, rs1799782, and rs25487) of 22 significant variants became non-significant. When sensitivity analyses removing studies with HWE-violating controls, four variants (*CYP1A1* rs1048943, *XRCC1* rs25489, rs1799782, and rs25487) became non-significant.

In non-smokers, statistical significant associations were found for ten variants, where two (*CYP1A1* rs1048943 and *ERCC2* rs13181) and eight (*ATM* rs189037, *GSTM1* present/null, *OGGI* rs1052133, *TP53* rs1042522, *XRCC1* rs3213245, *CYP2E1* rs6413432, rs2031920, and *ERCC1* rs11615) showed moderate genetic associations (ORs range 1.5-2.0) and low genetic associations (ORs range 0.67-1.50) with lung cancer risk, respectively (**Supplementary Table S8**). Of the ten significant variants, six (*CYP2E1* rs6413432 and rs2031920, *ERCC1* rs11615, *ERCC2* rs13181, *OGGI* rs1052133, and *XRCC1* rs3213245) and four (*ATM* rs189037, *CYP1A1* rs1048943, *GSTM1* present/null, and *TP53* rs1042522) were identified from meta-analyses with little or no heterogeneity ( $I^2 < 25\%$ ) and moderate heterogeneity ( $25\% \leq I^2 \leq 50\%$ ), respectively. Of the ten significant variants, the variant (*OGGI* rs1052133) and variant (*ATM* rs189037) were identified from meta-analyses showing evidence of potential publication bias and bias of small study effects, respectively (**Supplementary Table S8**). Based on the sensitivity analyses, two variants (*ATM* rs189037 and *CYP1A1* rs1048943) became non-significant associations with lung cancer risk after relative meta-analysis removing the initial study.

## Supplementary Figures

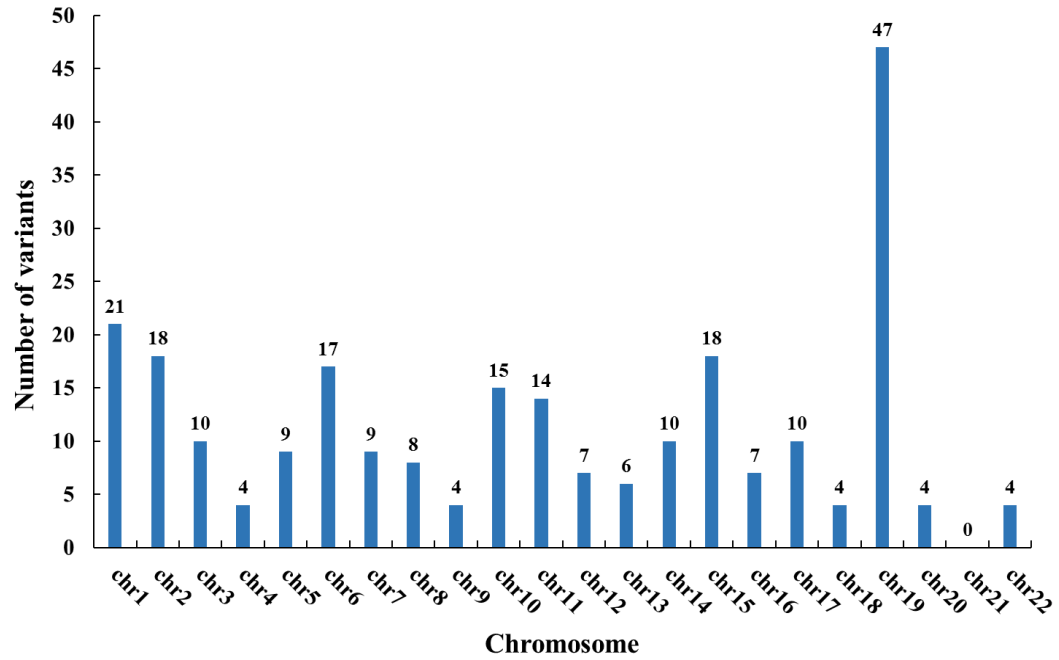

**Supplementary Figure S1.** Distribution by chromosome of 246 genetic variants available for meta-analyses.

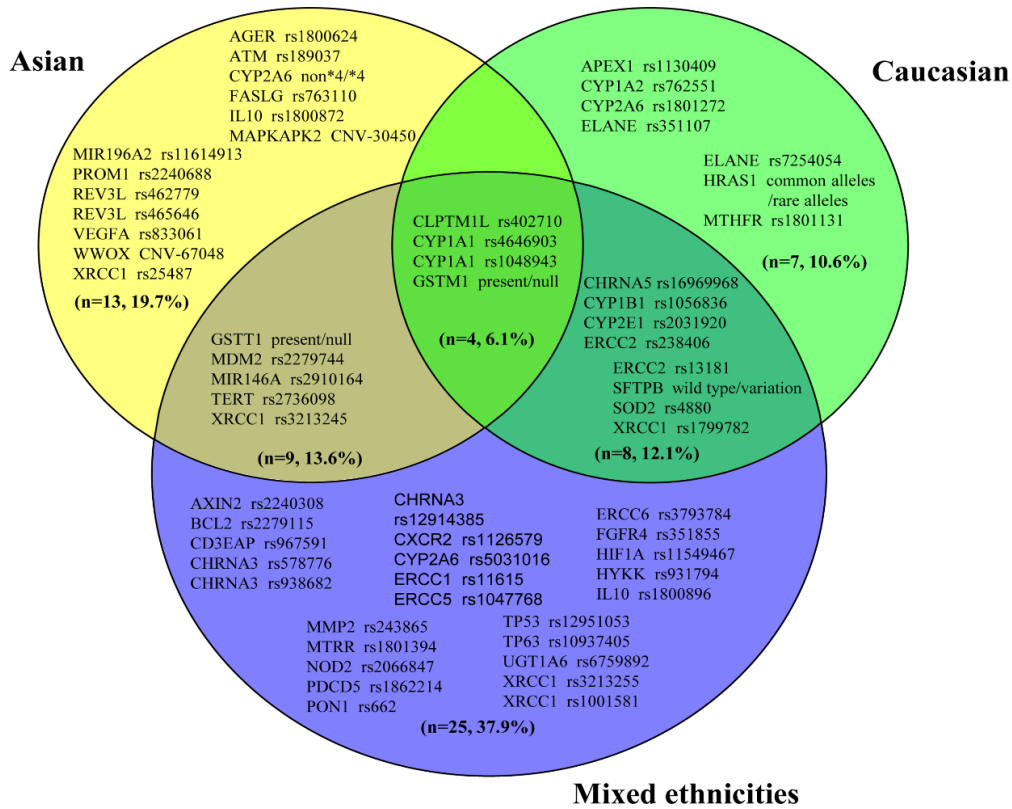

**Supplementary Figure S2.** Venn diagram of the distributions of genetic variants with significant associations with lung cancer risk in the main meta-analyses and subgroup meta-analyses by ethnicity (Asian and Caucasian).

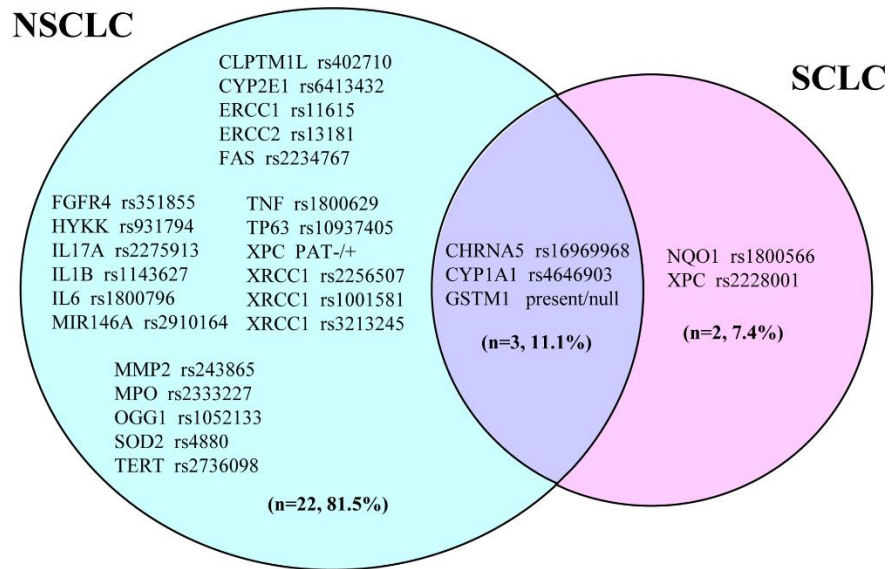

**Supplementary Figure S3.** Venn diagram of the distributions of genetic variants with significant associations with specific histological types of lung cancer. NSCLC: non-small cell lung cancer; SCLC: small cell lung cancer.



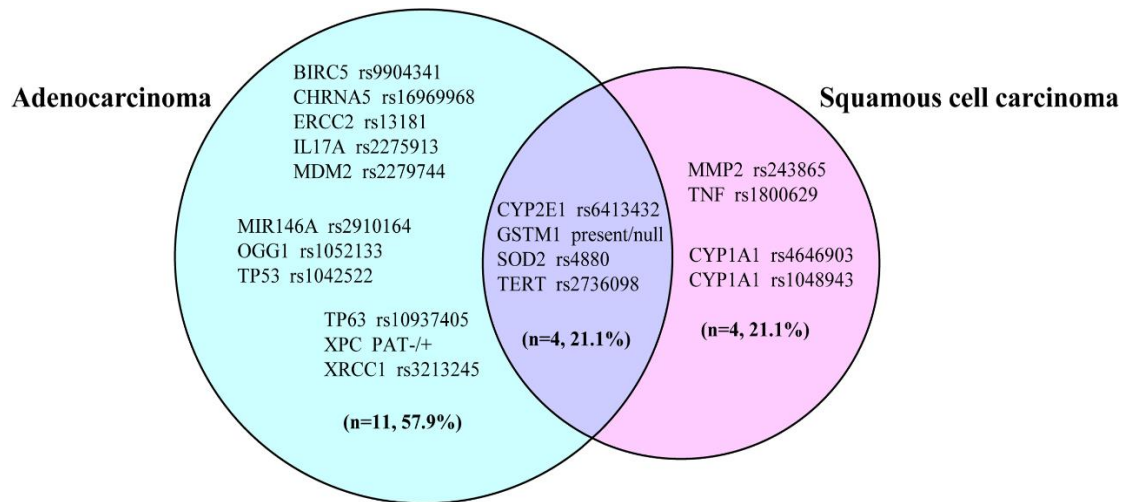

**Supplementary Figure S4.** Venn diagram of the distributions of genetic variants with significant associations with lung adenocarcinoma and squamous cell carcinoma.

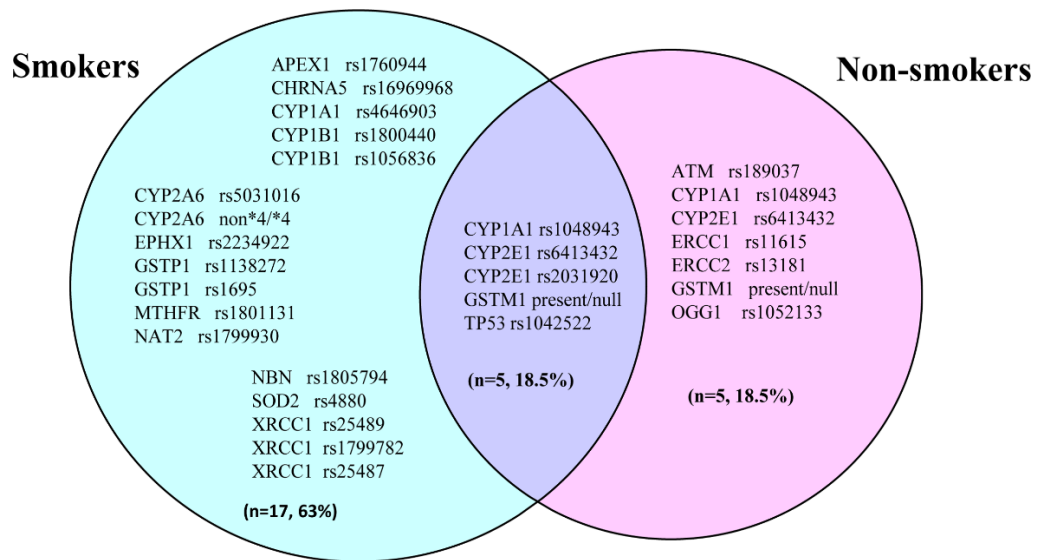

**Supplementary Figure S5.** Venn diagram of the distributions of genetic variants with significant associations in subgroup meta-analyses of smoker and non-smoker.

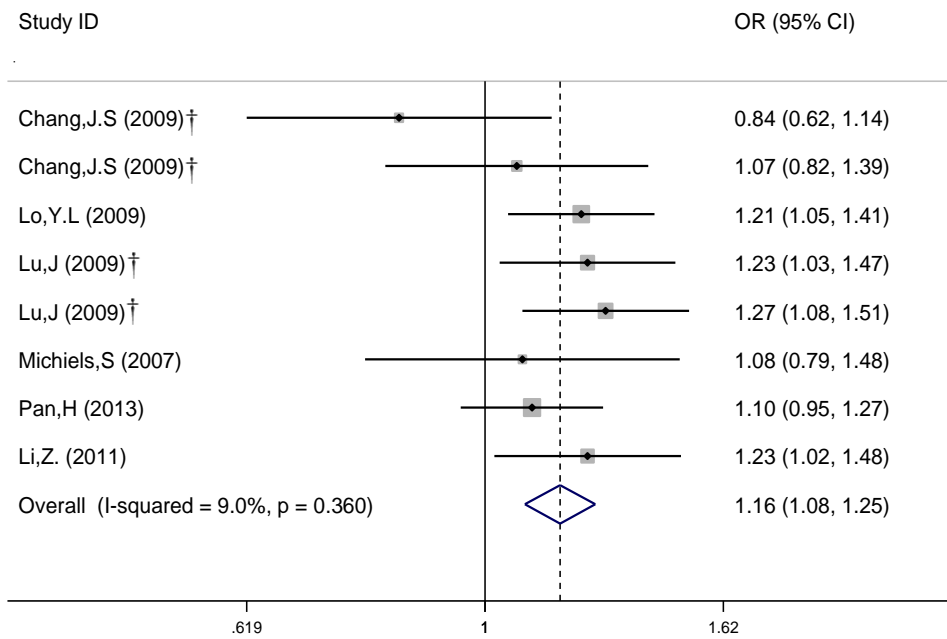

**Supplementary Figure S6.1.** Main meta-analysis of *APEX1* rs1760944 (allelic contrast: A vs. C).

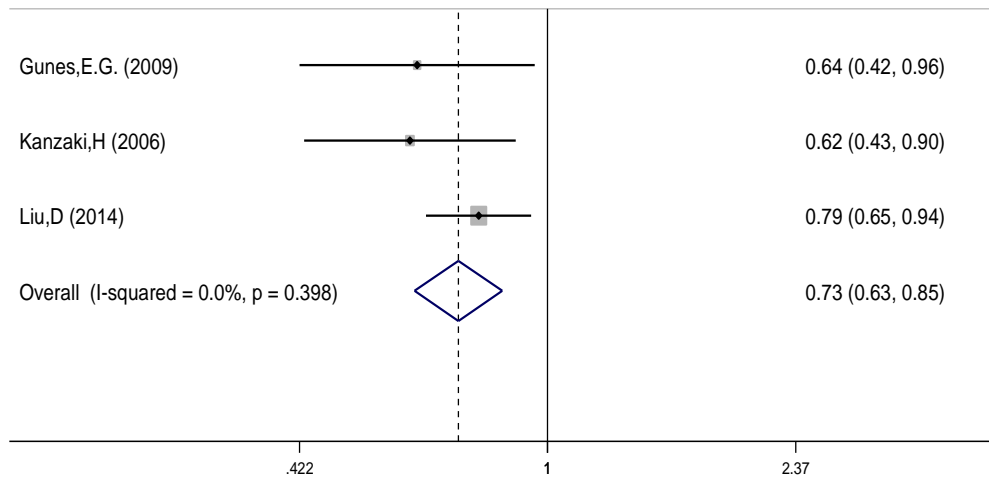

**Supplementary Figure S6.2.** Main meta-analysis of *AXIN2* rs2240308 (allelic contrast: T vs. C).

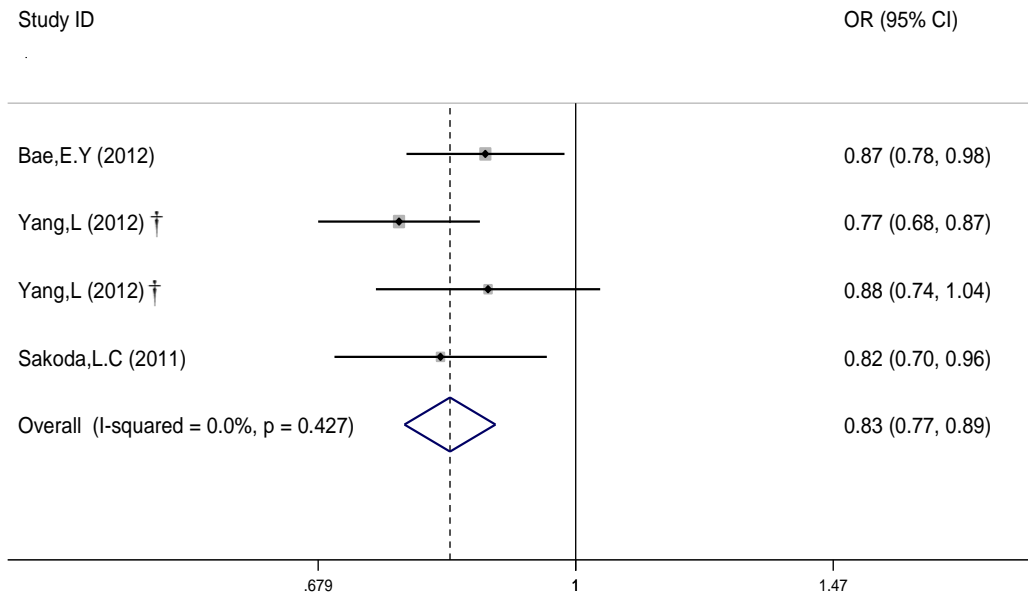

**Supplementary Figure S6.3.** Main meta-analysis of *CHRNA3* rs6495309 (allelic contrast: T vs. C).

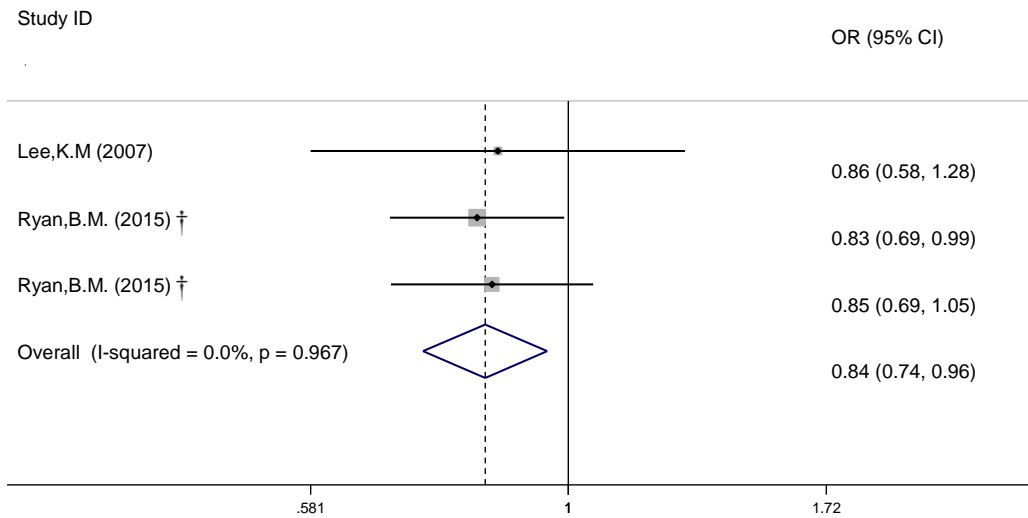

**Supplementary Figure S6.4.** Main meta-analysis of *CXCR2* rs1126579 (allelic contrast: T vs. C).

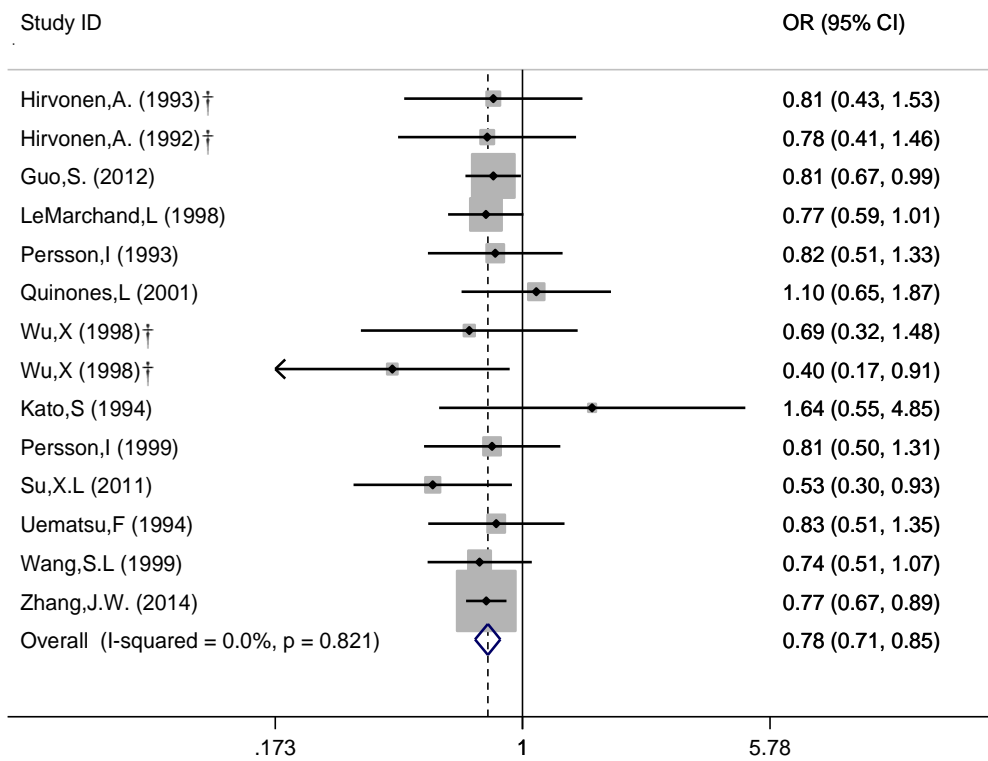

**Supplementary Figure S6.5.** Main meta-analysis of *CYP2E1* rs6413432 (allelic contrast: A vs. T).

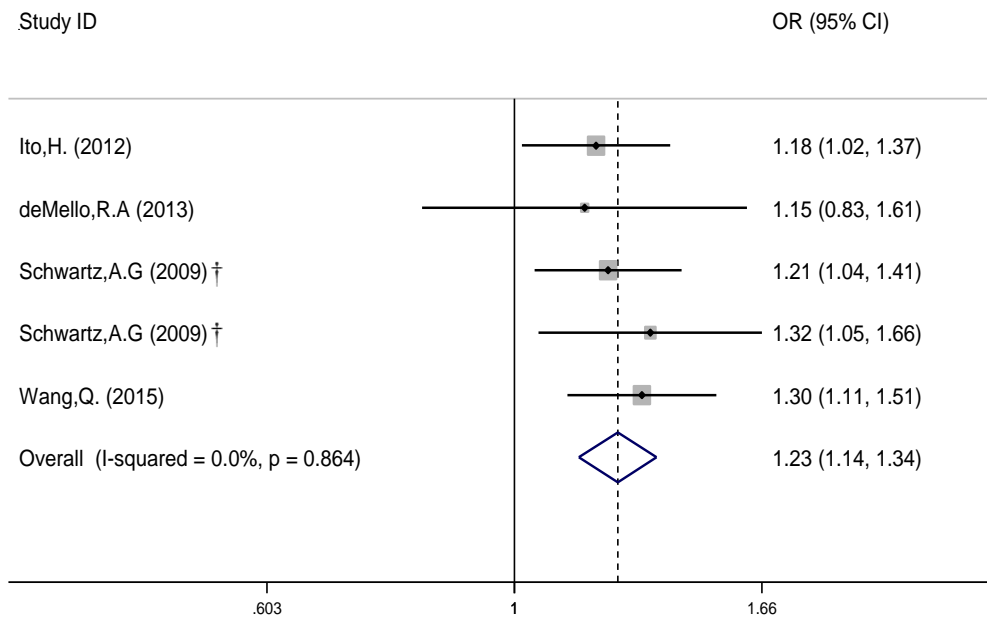

**Supplementary Figure S6.6.** Main meta-analysis of *HYKK* rs931794 (allelic contrast:

G vs. A).

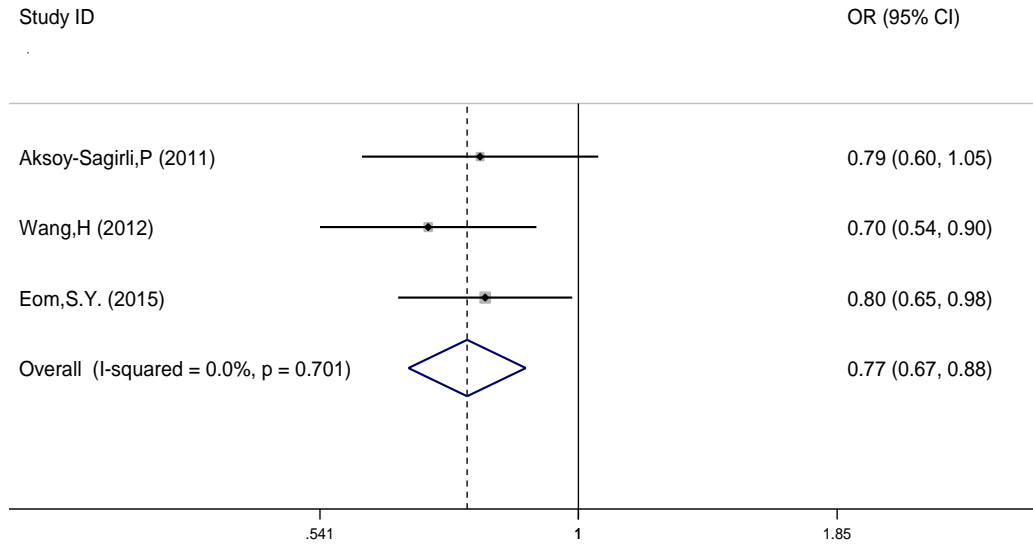

**Supplementary Figure S6.7.** Main meta-analysis of *PON1* rs662 (allelic contrast: A vs. G).

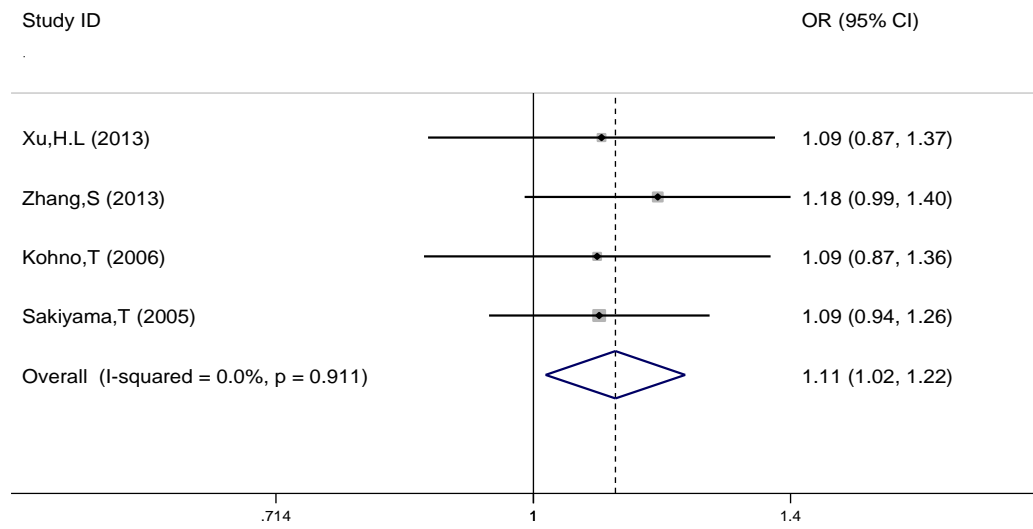

**Supplementary Figure S6.8.** Main meta-analysis of *REV3L* rs462779 (allelic contrast: T vs. C). (Available data were limited to Asian populations.)

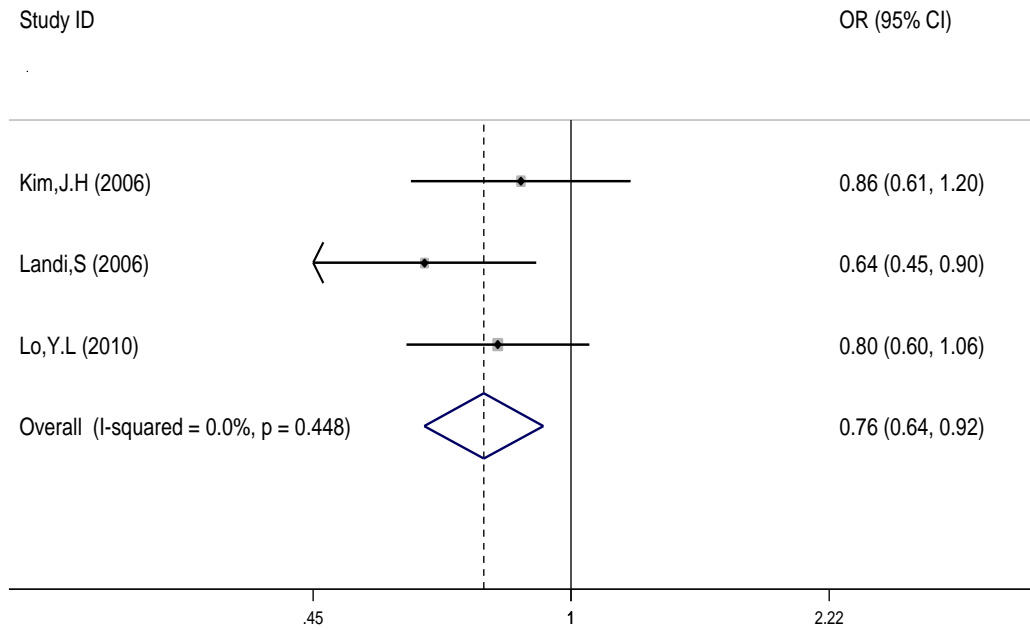

**Supplementary Figure S6.9.** Meta-analysis of *ATM* rs664677 (Dominant: CC+CT vs. TT).

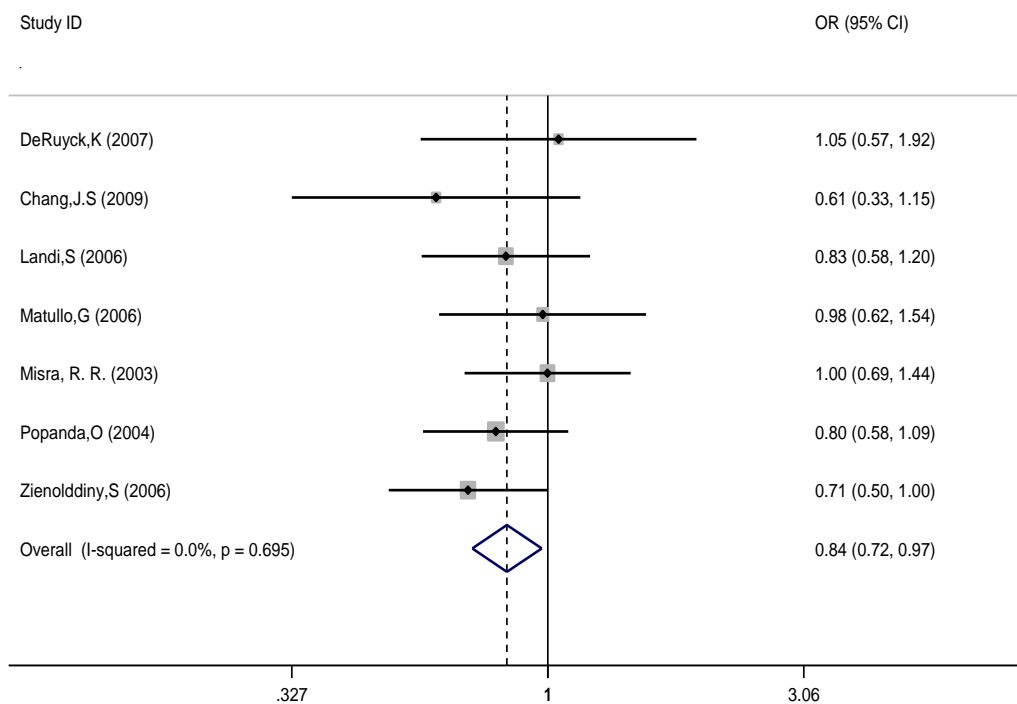

**Supplementary Figure S6.10.** Subgroup meta-analysis of *APEX1* rs1130409 in Caucasian (Recessive: TT vs. GG+GT).

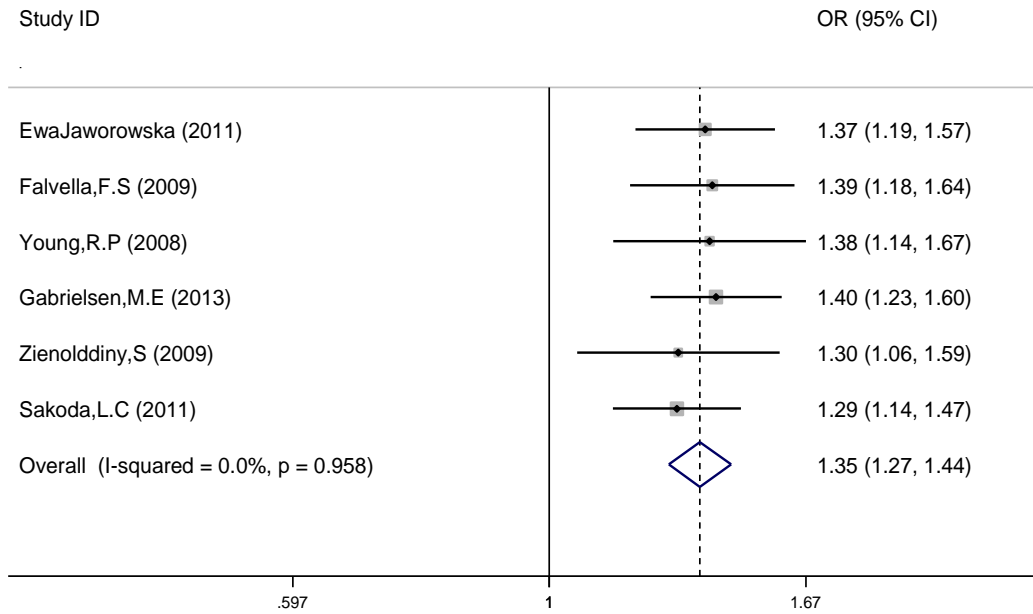

**Supplementary Figure S6.11.** Subgroup meta-analysis of *CHRNA5* rs16969968 in Caucasian (allelic contrast: A vs. G).

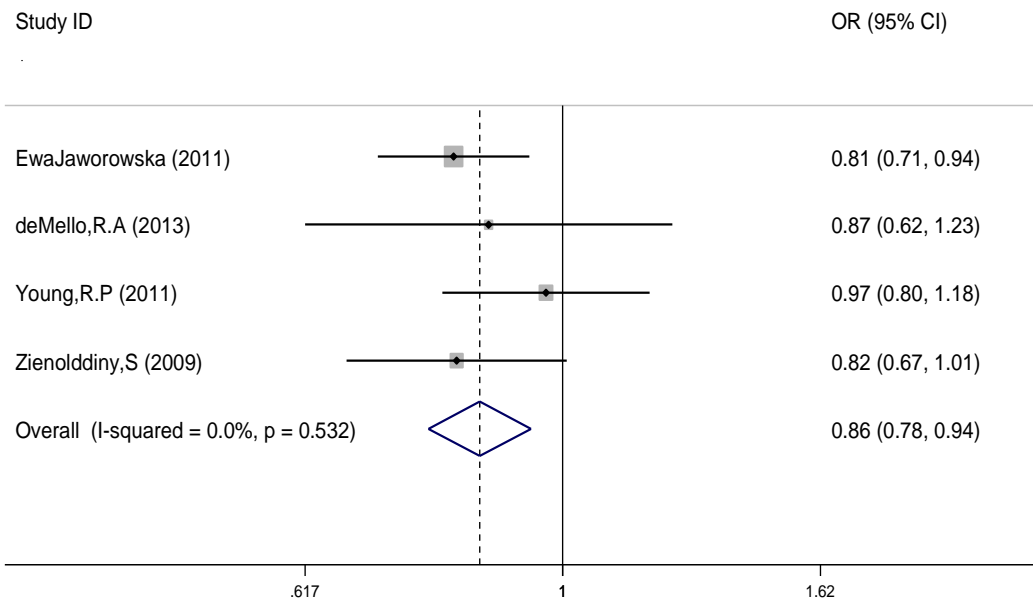

**Supplementary Figure S6.12.** Subgroup meta-analysis of *CLPTMIL* rs402710 in Caucasian (allelic contrast: T vs. C).



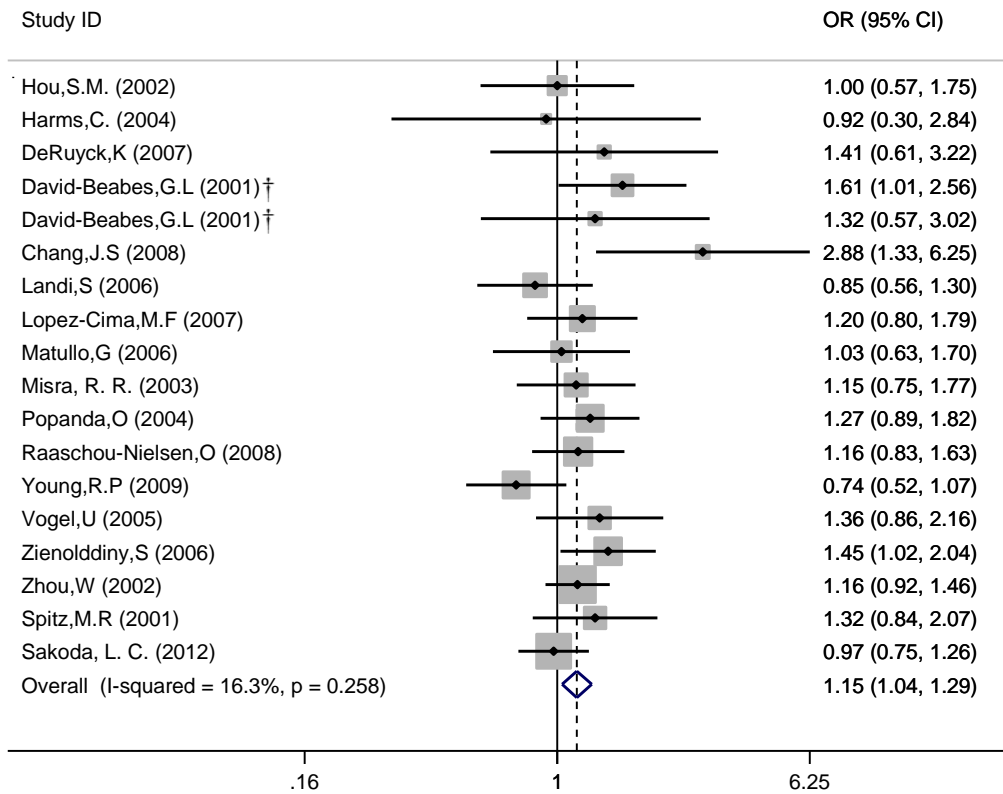

**Supplementary Figure S6.13.** Subgroup meta-analysis of *ERCC2* rs13181 in Caucasian (Recessive: AA vs. CC+CA).

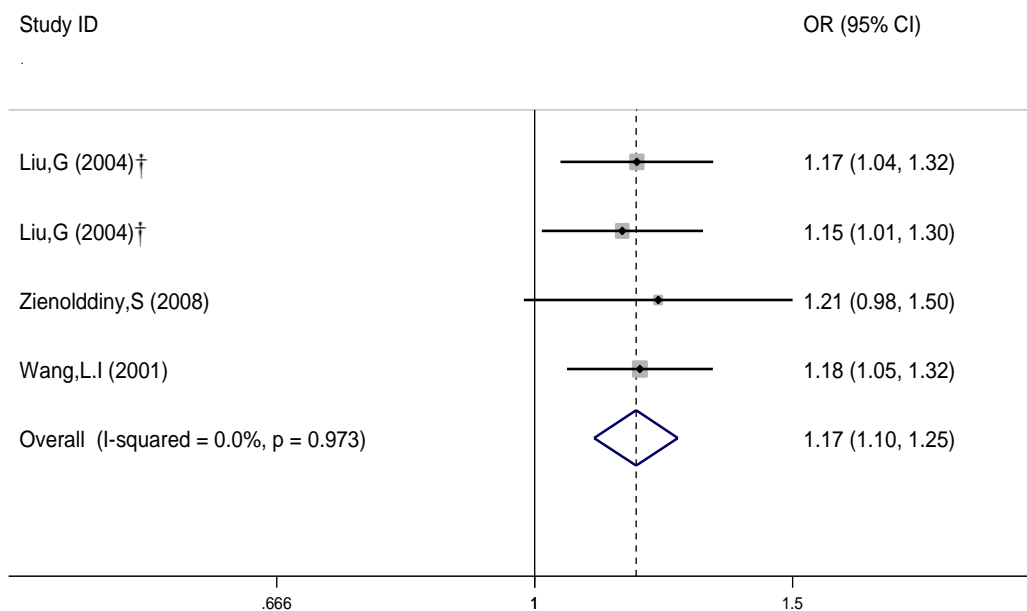

**Supplementary Figure S6.14.** Subgroup meta-analysis of *SOD2* rs4880 in Caucasian (allelic contrast: T vs. C).

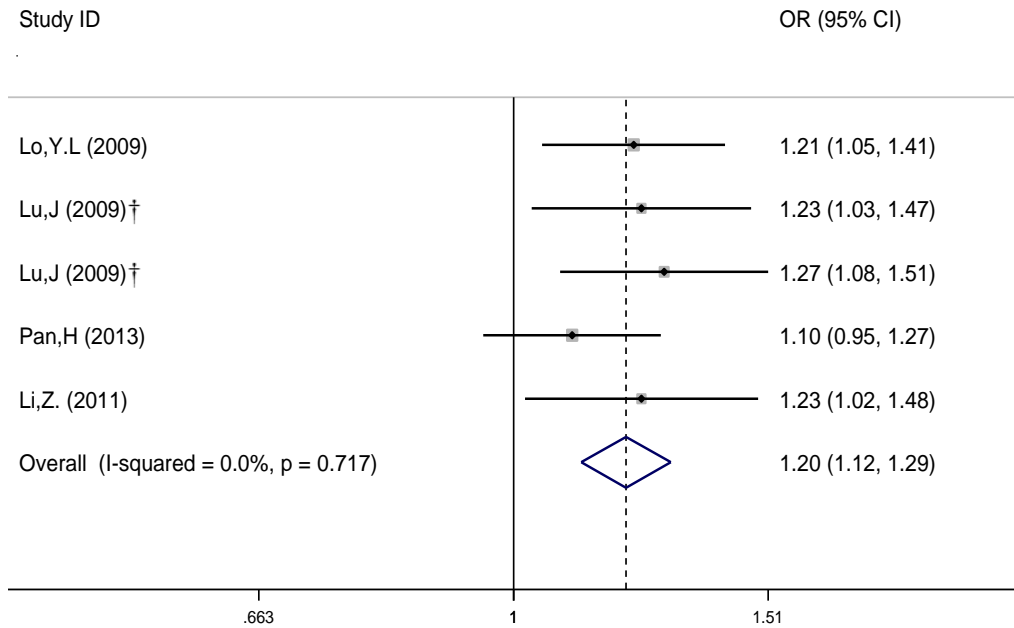

**Supplementary Figure S6.15.** Subgroup meta-analysis of *APEXI* rs1760944 in Asian (allelic contrast: A vs. C).

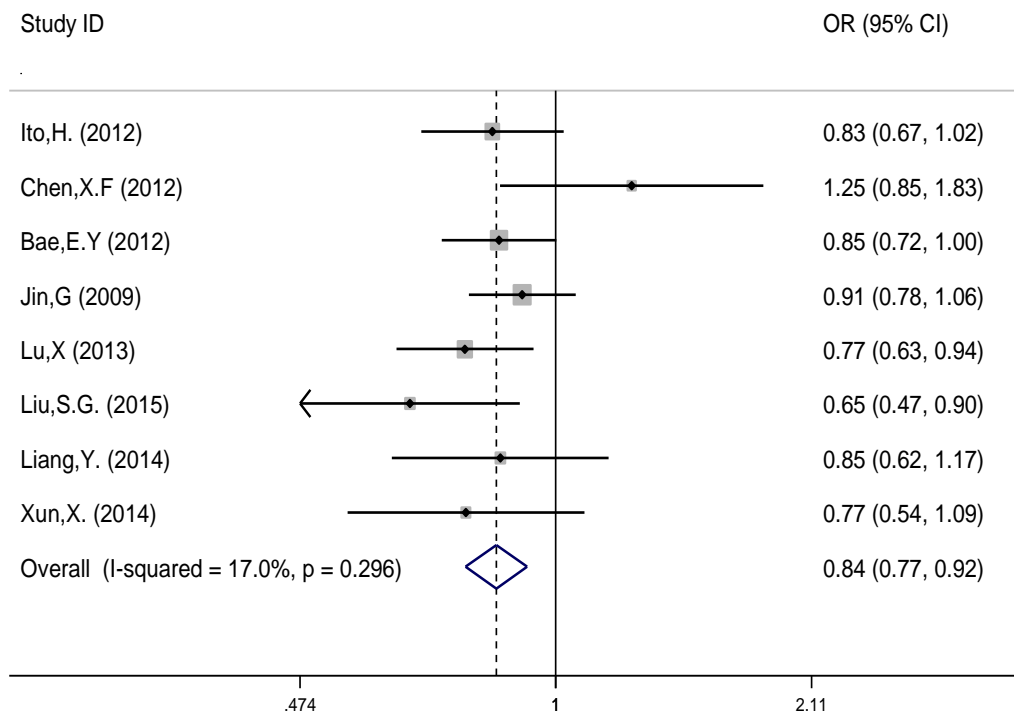

**Supplementary Figure S6.16.** Subgroup meta-analysis of *CLPTMIL* rs402710 in Asian (Dominant: TT+TC vs. CC).

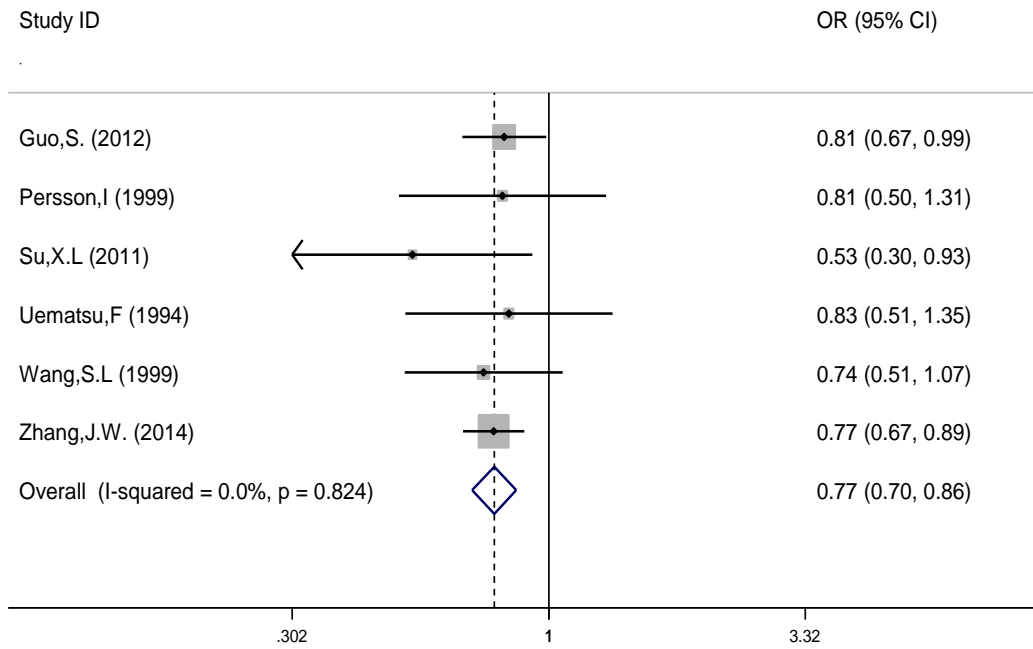

**Supplementary Figure S6.17.** Subgroup meta-analysis of *CYP2E1* rs6413432 in Asian (allelic contrast: A vs. T).

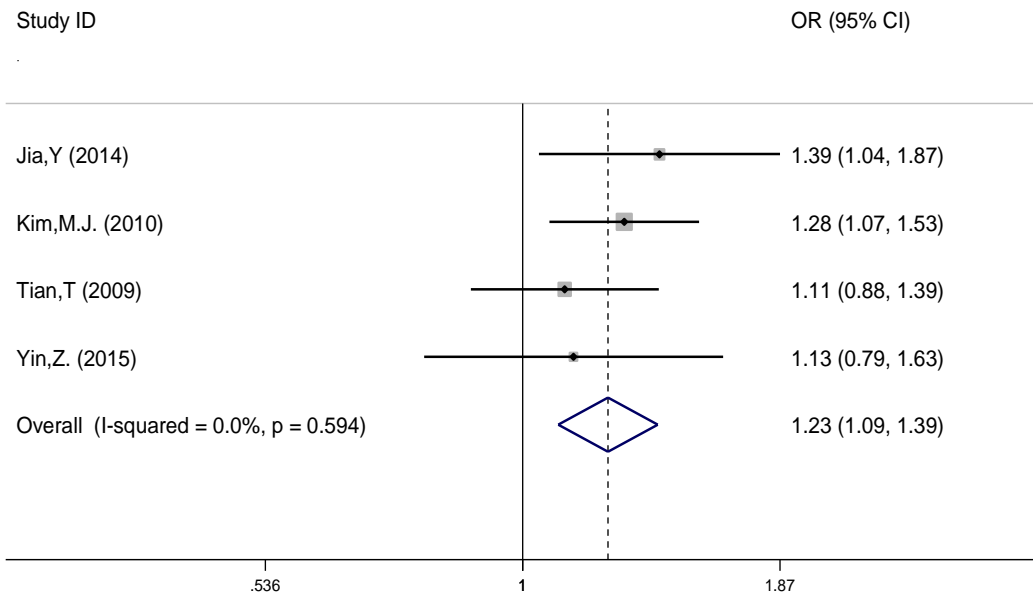

**Supplementary Figure S6.18.** Subgroup meta-analysis of *MIR146A* rs2910164 in Asian (Recessive: GG vs. CC+CG).

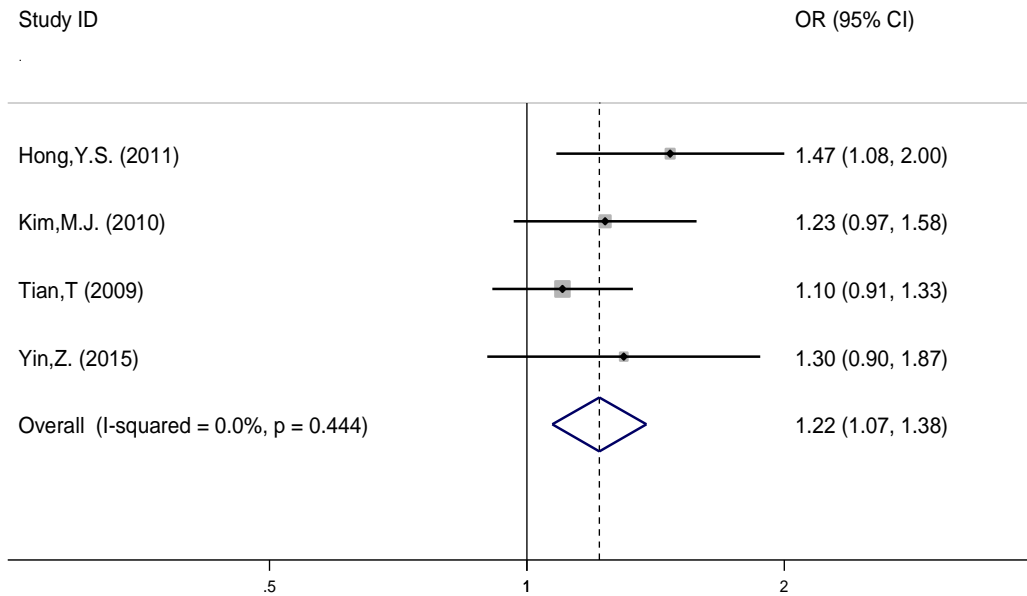

**Supplementary Figure S6.19.** Subgroup meta-analysis of *MIR196A2* rs11614913 in Asian (Dominant: CC+CT vs. TT).

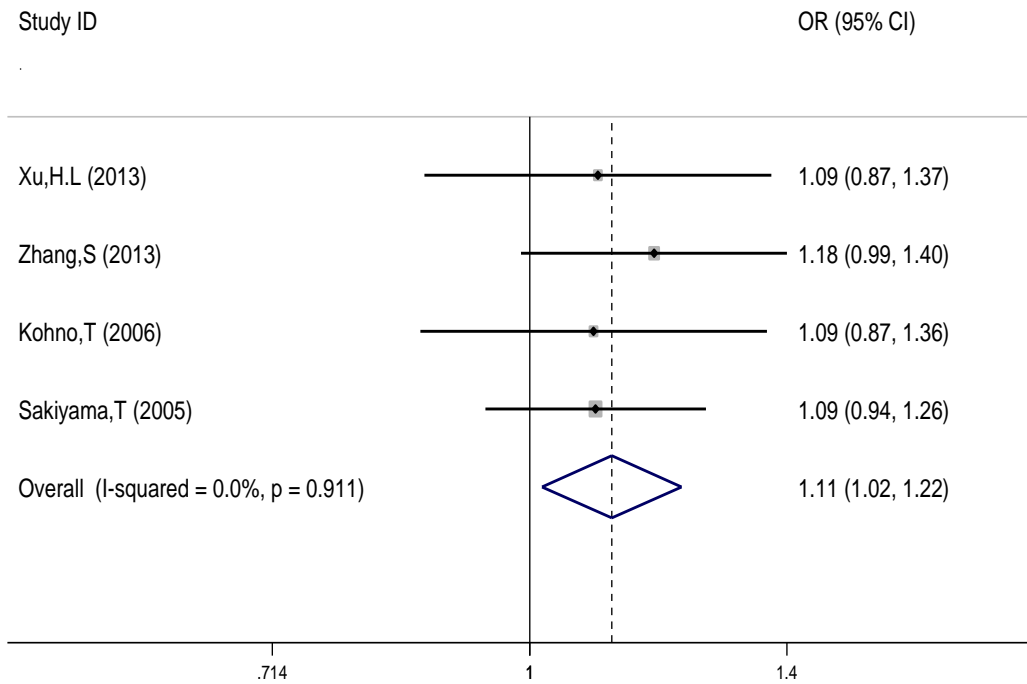

**Supplementary Figure S6.20.** Subgroup meta-analysis of *REV3L* rs462779 in Asian (allelic contrast: T vs. C).

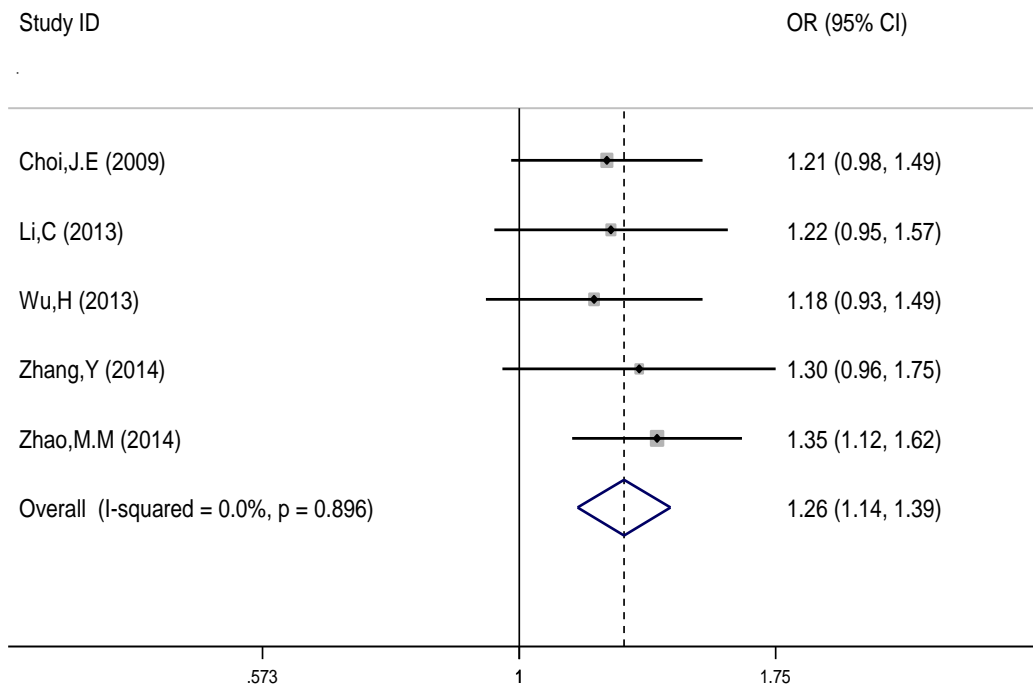

**Supplementary Figure S6.21.** Subgroup meta-analysis of *TERT* rs2736098 in Asian (Dominant: AA+AG vs. GG).

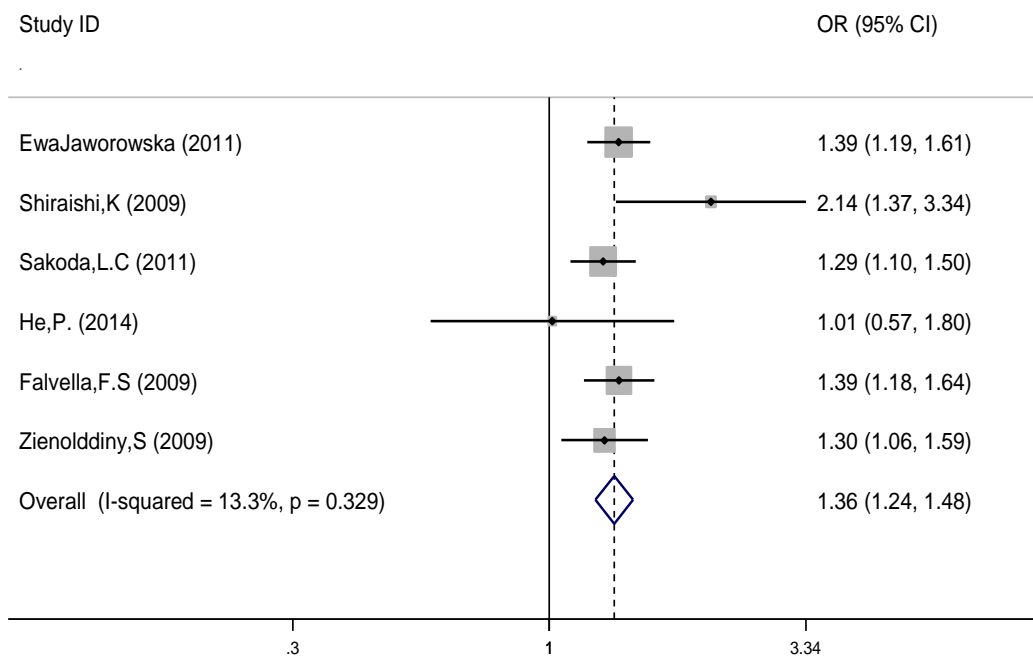

**Supplementary Figure S6.22.** Subgroup meta-analysis of *CHRNA5* rs16969968 in non-small cell lung cancer population (allelic contrast: A vs. G).

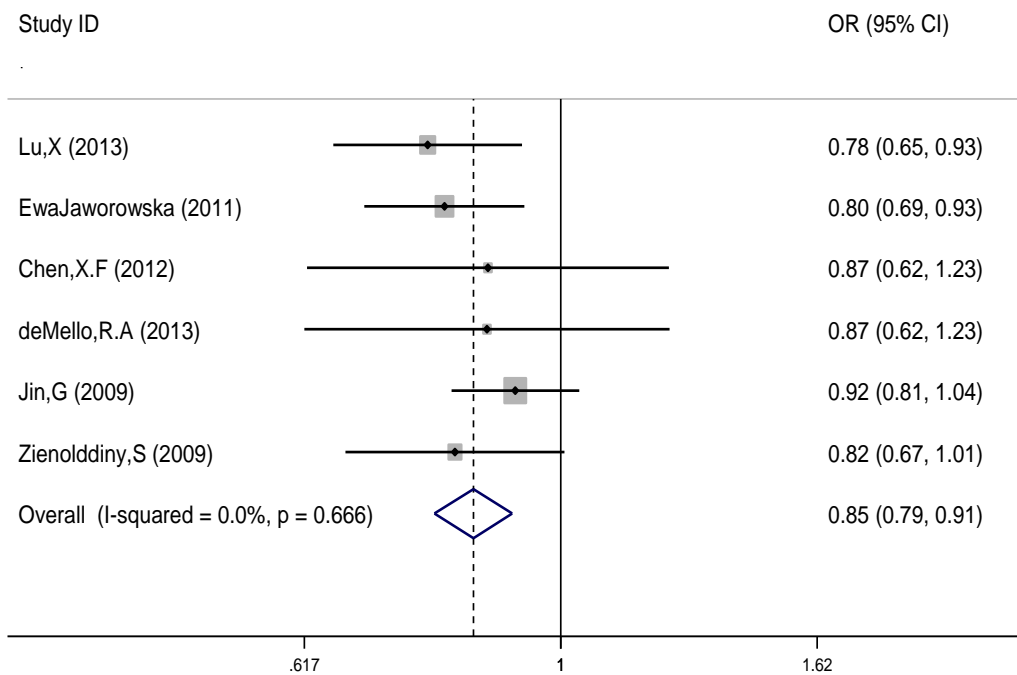

**Supplementary Figure S6.23.** Subgroup meta-analysis of *CLPTMIL* rs402710 in non-small cell lung cancer population (allelic contrast: T vs. C).

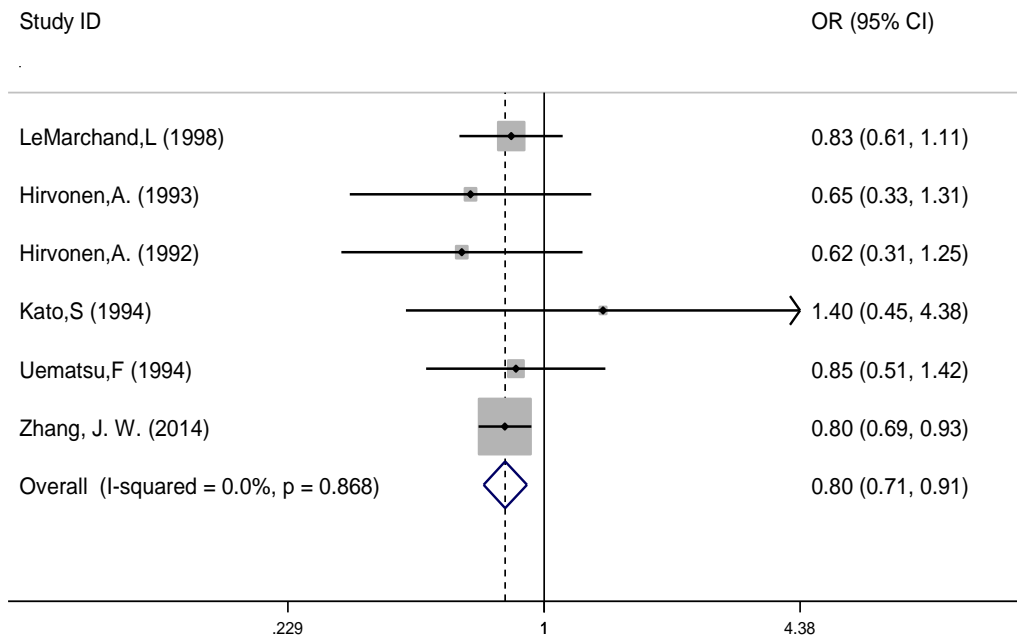

**Supplementary Figure S6.24.** Subgroup meta-analysis of *CYP2E1* rs6413432 in non-small cell lung cancer population (allelic contrast: A vs. T).

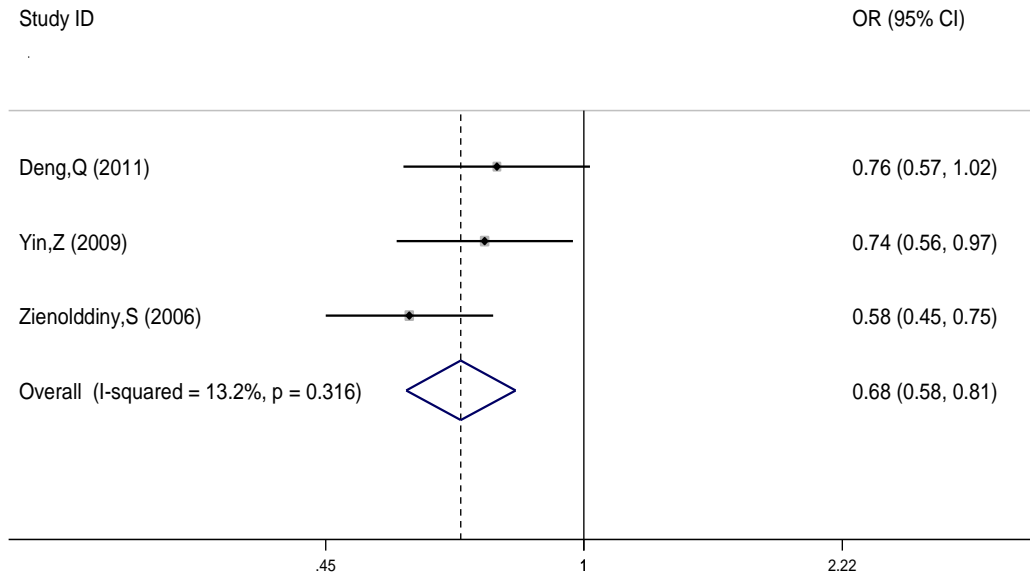

**Supplementary Figure S6.25.** Subgroup meta-analysis of *ERCC1* rs11615 in non-small cell lung cancer population (allelic contrast: C vs. T).

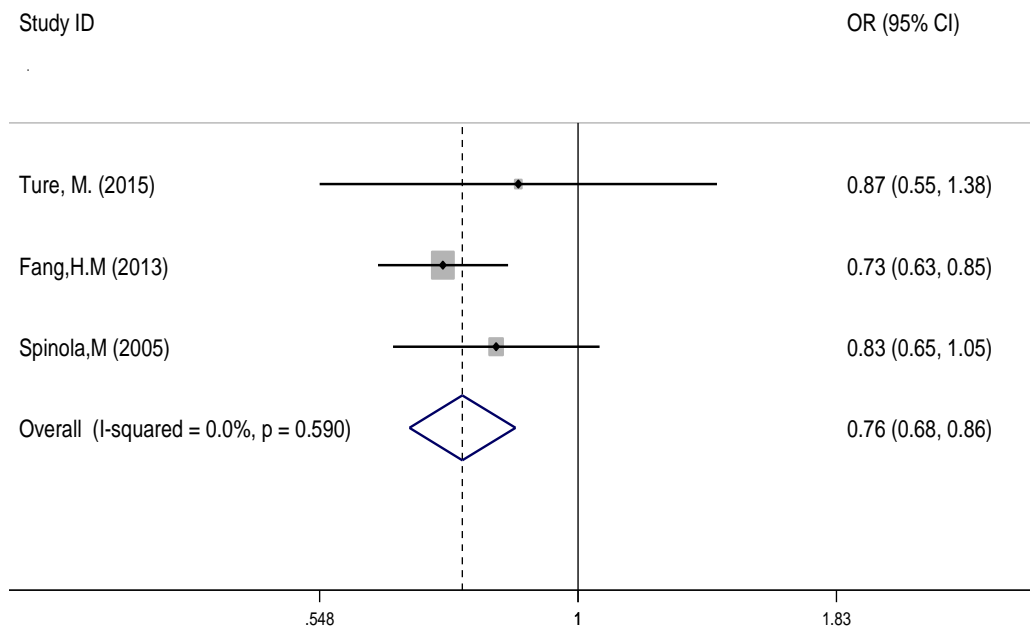

**Supplementary Figure S6.26.** Subgroup meta-analysis of *FGFR4* rs351855 in non-small cell lung cancer population (allelic contrast: A vs. G).

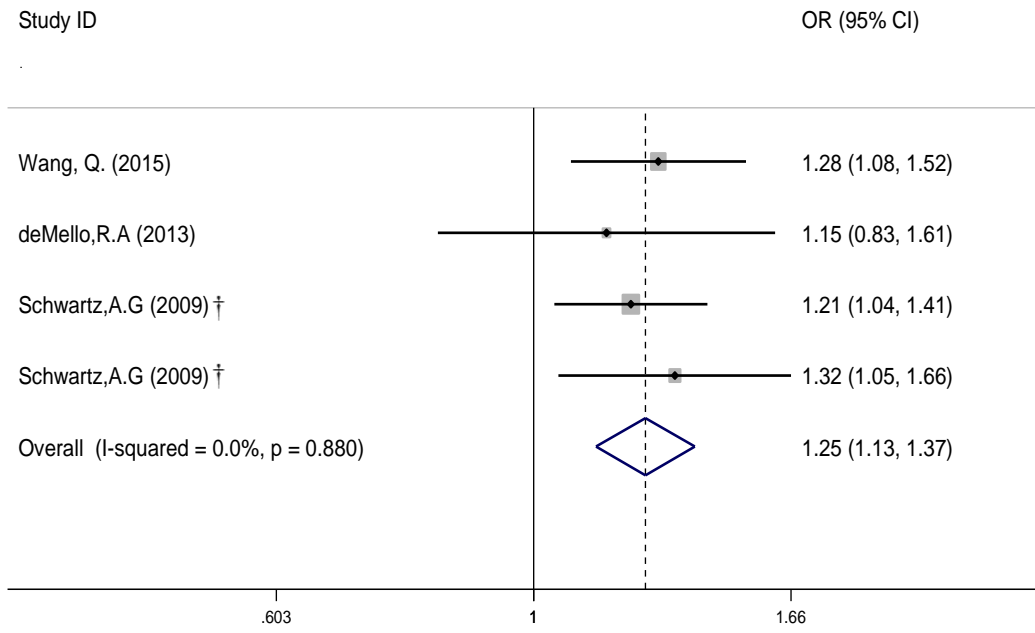

**Supplementary Figure S6.27.** Subgroup meta-analysis of *HYKK* rs931794 in non-small cell lung cancer population (allelic contrast: G vs. A).

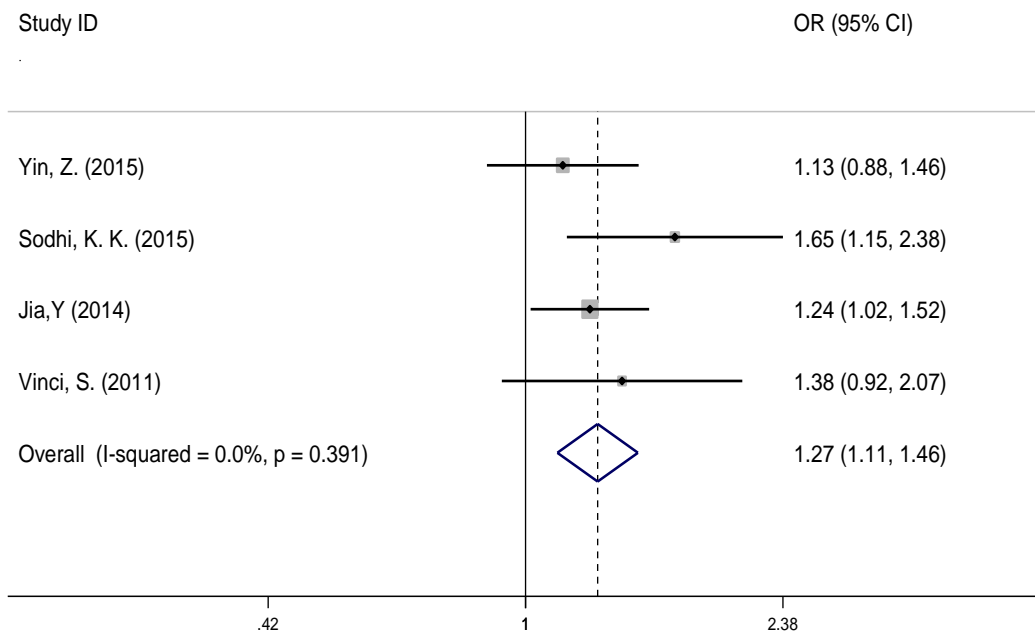

**Supplementary Figure S6.28.** Subgroup meta-analysis of *MIR146A* rs2910164 in non-small cell lung cancer population (allelic contrast: C vs. G).



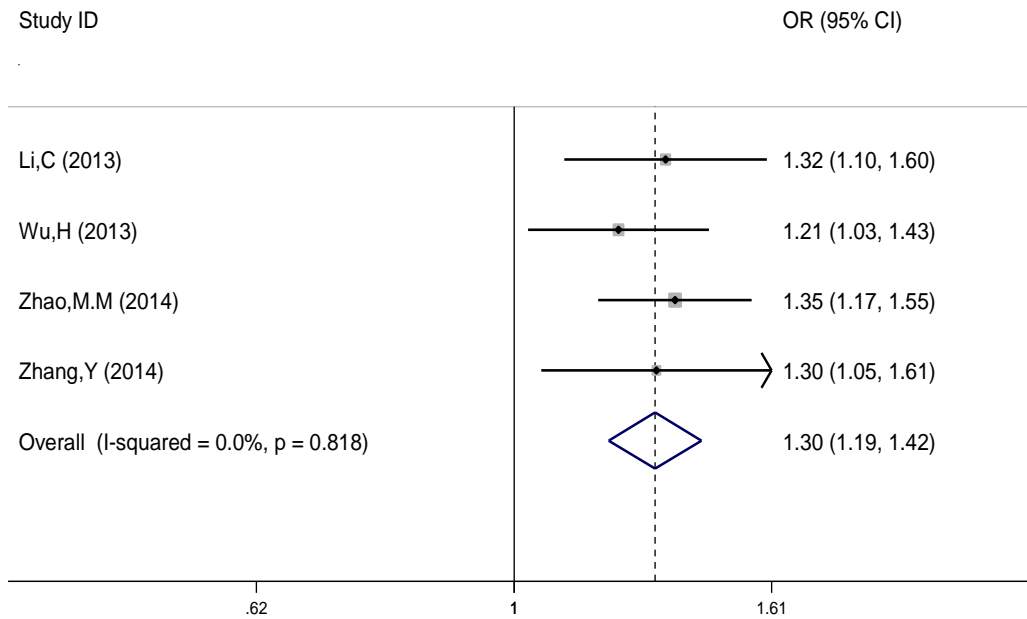

**Supplementary Figure S6.29.** Subgroup meta-analysis of *TERT* rs2736098 in non-small cell lung cancer population (allelic contrast: A vs. G).

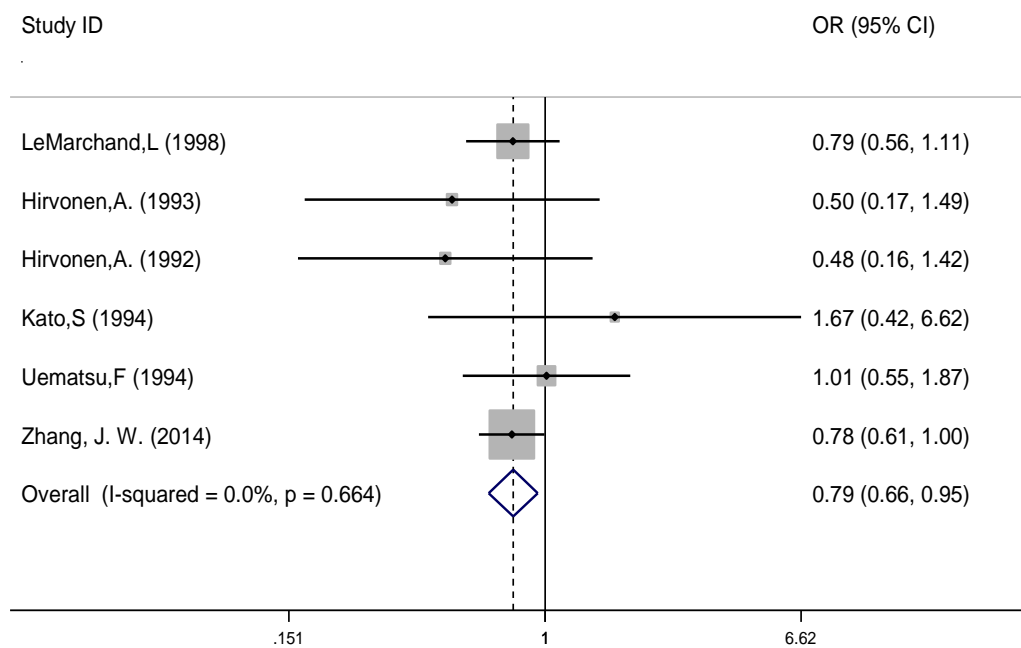

**Supplementary Figure S6.30.** Subgroup meta-analysis of *CYP2E1* rs6413432 in adenocarcinoma population (allelic contrast: A vs. T).

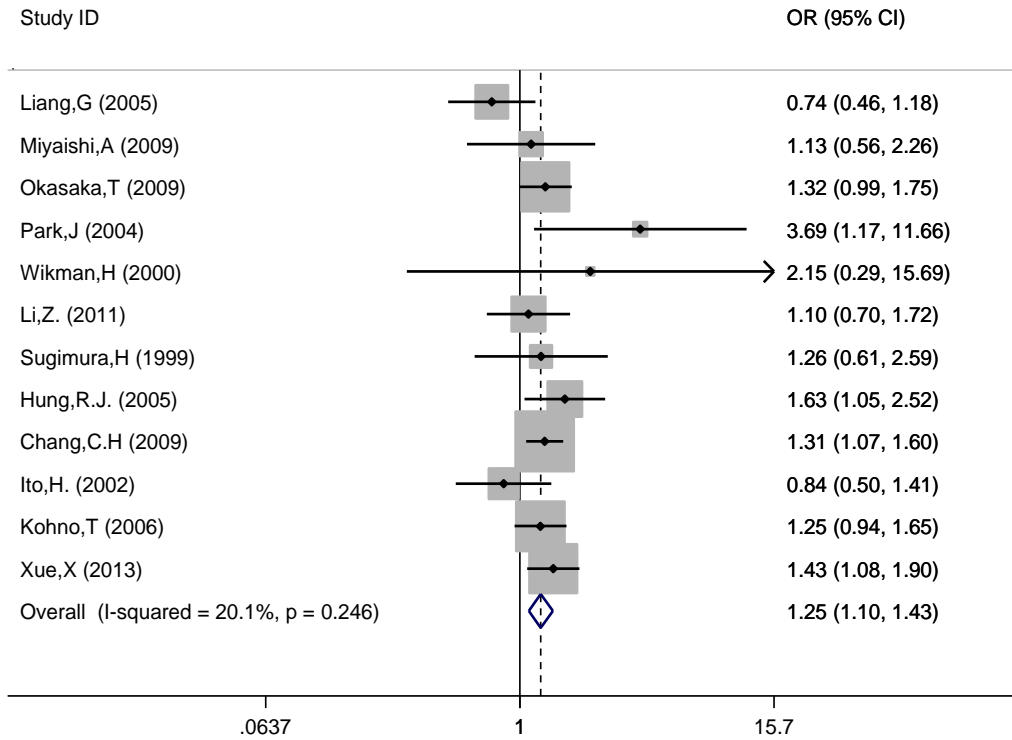

**Supplementary Figure S6.31.** Subgroup meta-analysis of *OGGI* rs1052133 in adenocarcinoma population (Recessive: CC vs. GG+GC).

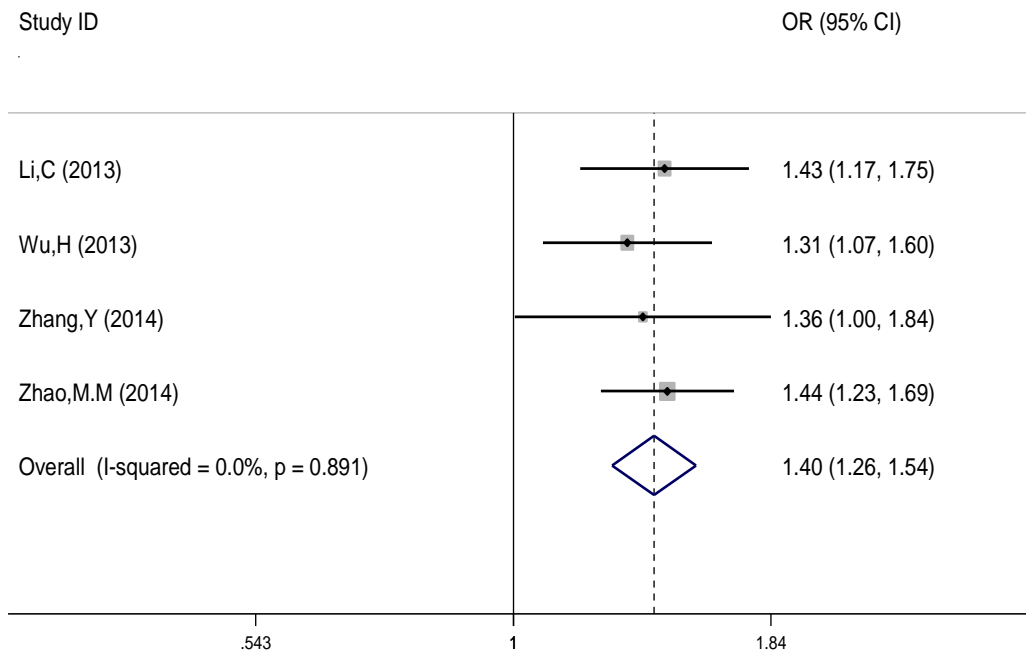

**Supplementary Figure S6.32.** Subgroup meta-analysis of *TERT* rs2736098 in adenocarcinoma population (allelic contrast: A vs. G).

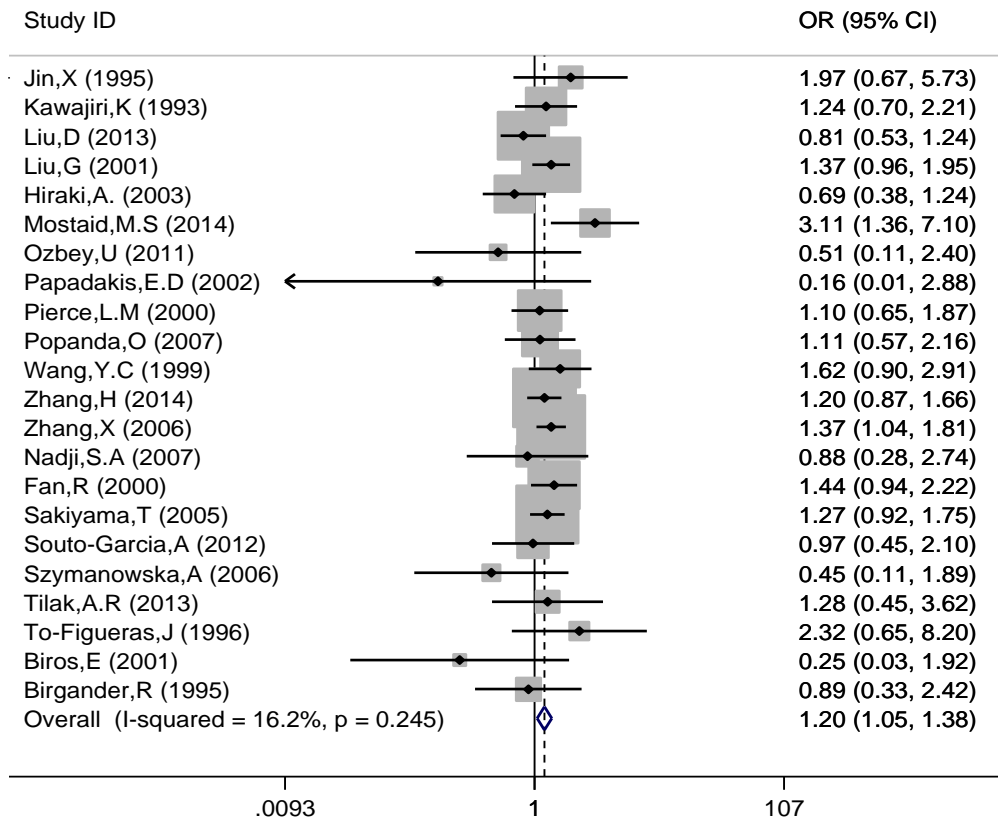

**Supplementary Figure S6.33.** Subgroup meta-analysis of *TP53* rs1042522 in adenocarcinoma population (Recessive: GG vs. CC+CG).

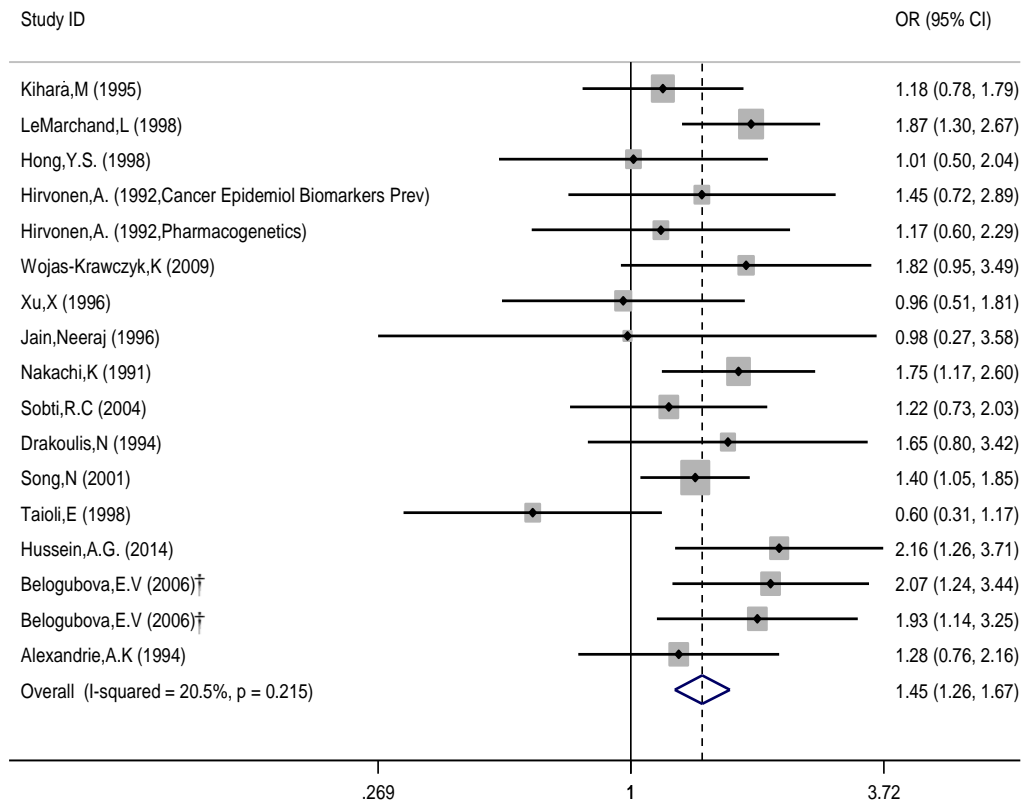

**Supplementary Figure S6.34.** Subgroup meta-analysis of *CYP1A1* rs4646903 in squamous cell carcinoma population (allelic contrast: C vs. T).

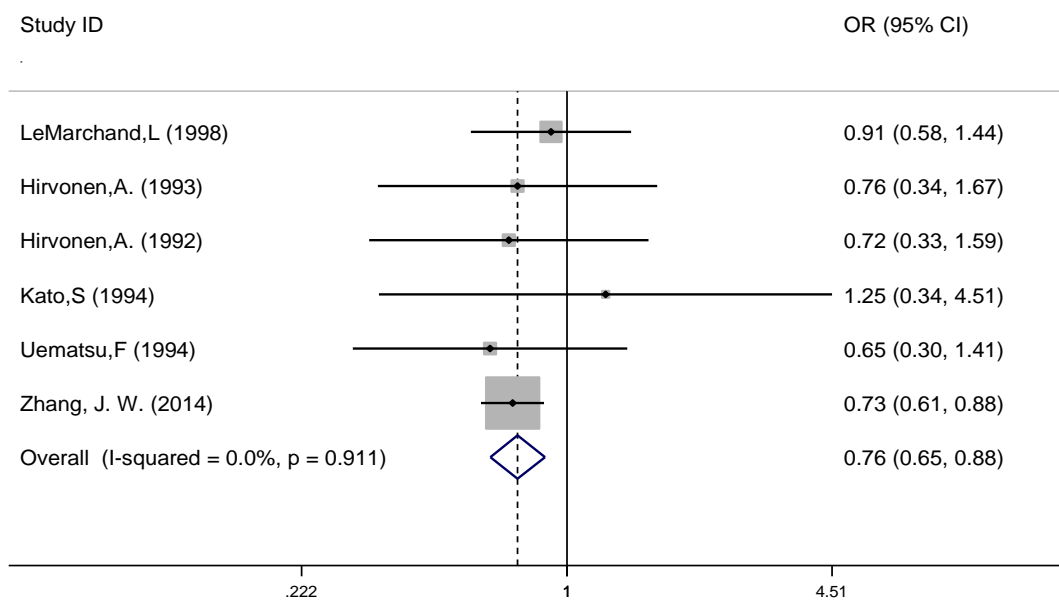

**Supplementary Figure S6.35.** Subgroup meta-analysis of *CYP2E1* rs6413432 in squamous cell carcinoma population (allelic contrast: A vs. T).

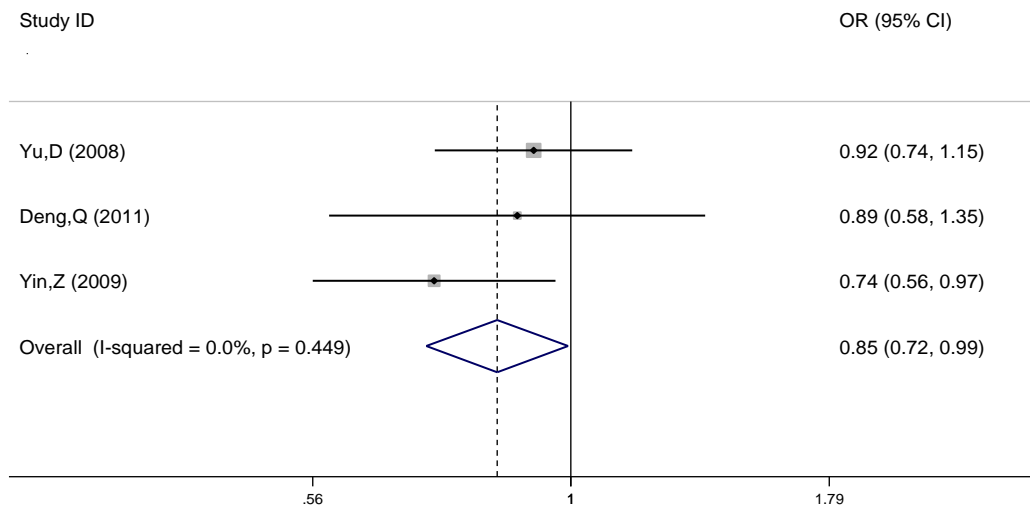

**Supplementary Figure S6.36.** Subgroup meta-analysis of *ERCC1* rs11615 in non-smokers (allelic contrast: C vs. T).

**Supplementary Figure S6.** Forest plots of main or subgroup meta-analyses for variants showed significant associations to lung cancer susceptibility with strong cumulative evidence. Study-specific allelic odds ratios (ORs, gray squares) and 95% confidence intervals (CIs, lines) were calculated for each included independent dataset. The summary OR and CI was calculated using DerSimonian and Laird random-effects models (white diamond), and genetic model used for meta-analysis was annotated in each single panel. For a complete list of meta-analyses performed for these variants, see **Supplementary Table S2, Table S4, Table S6, and Table S8.** †A report included two independent study populations or different racial groups, and data for each independent population was extracted and analyzed separately.

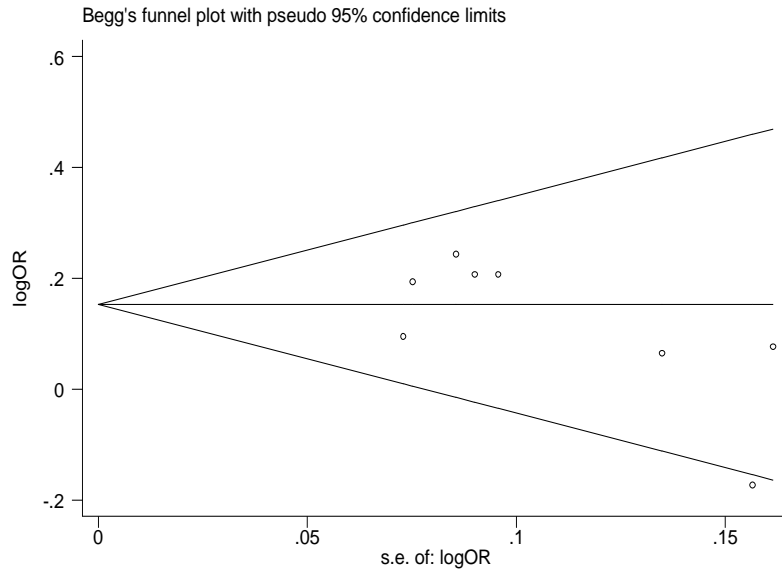

**Supplementary Figure S7.1.** Main meta-analysis of *APEX1* rs1760944 (allelic contrast: A vs. C).

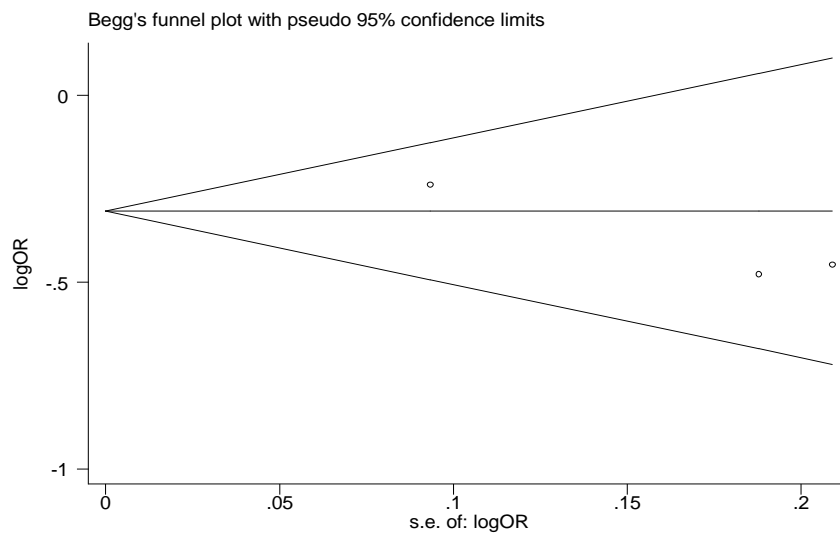

**Supplementary Figure S7.2.** Main meta-analysis of *AXIN2* rs2240308 (allelic contrast: T vs. C).

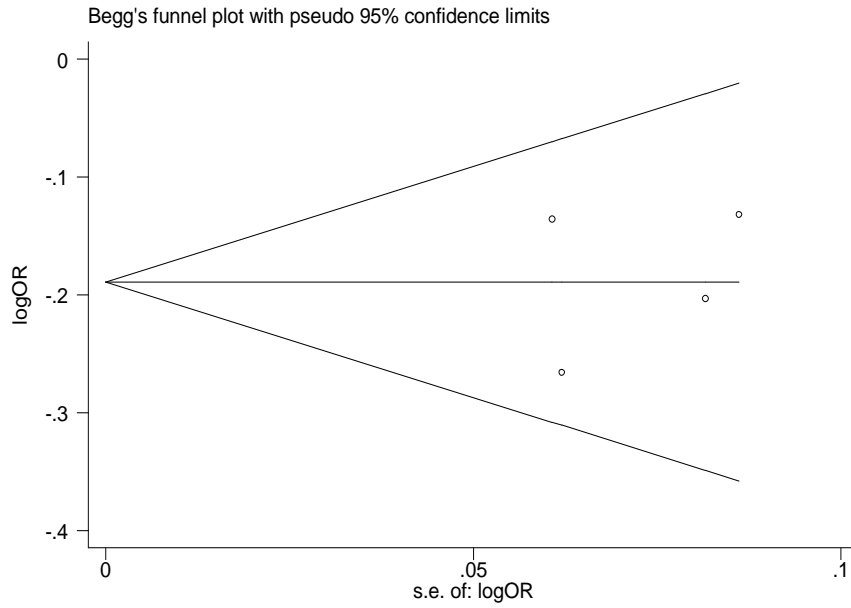

**Supplementary Figure S7.3.** Main meta-analysis of *CHRNA3* rs6495309 (allelic contrast: T vs. C).

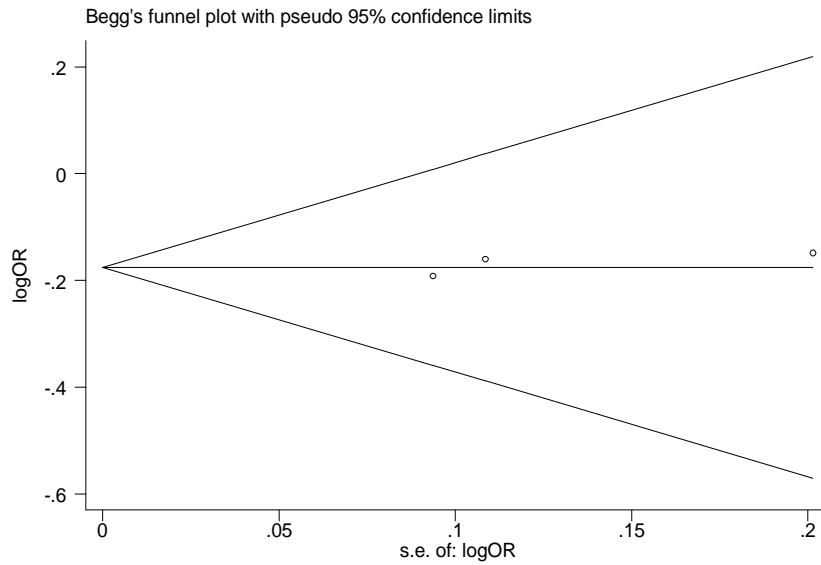

**Supplementary Figure S7.4.** Main meta-analysis of *CXCR2* rs1126579 (allelic contrast: T vs. C).





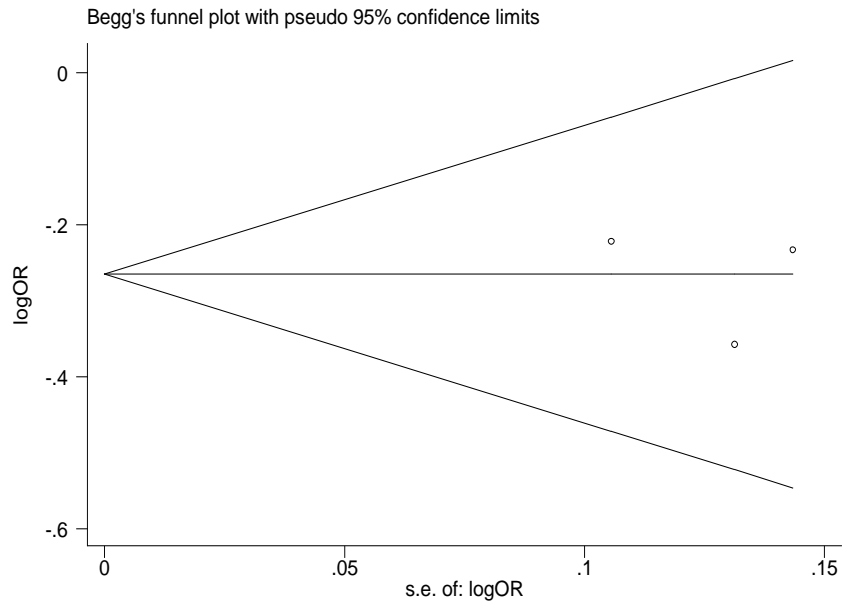

**Supplementary Figure S7.7.** Main meta-analysis of *PON1* rs662 (allelic contrast: A vs. G).

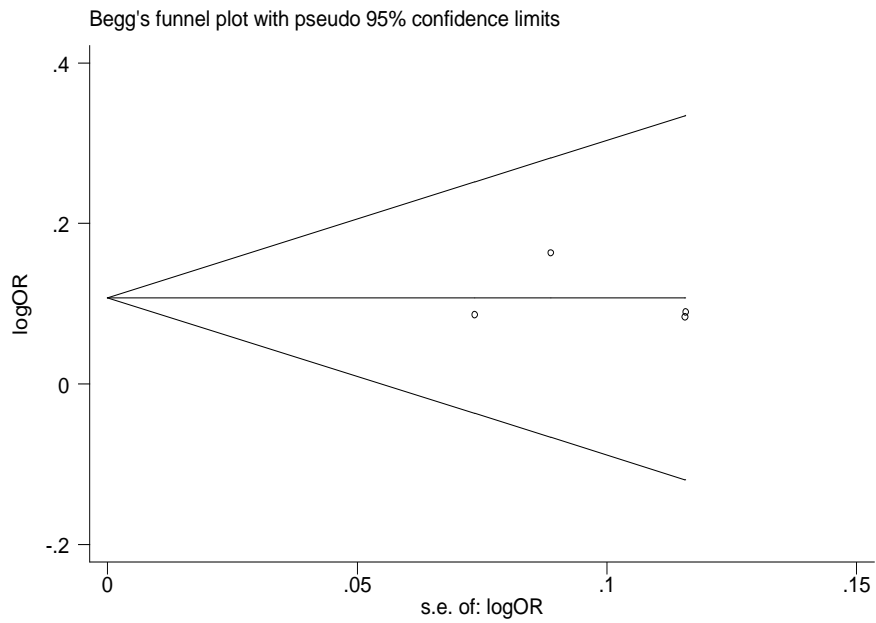

**Supplementary Figure S7.8.** Main meta-analysis of *REV3L* rs462779 (allelic contrast: T vs. C). (Available data limited to Asian populations.)

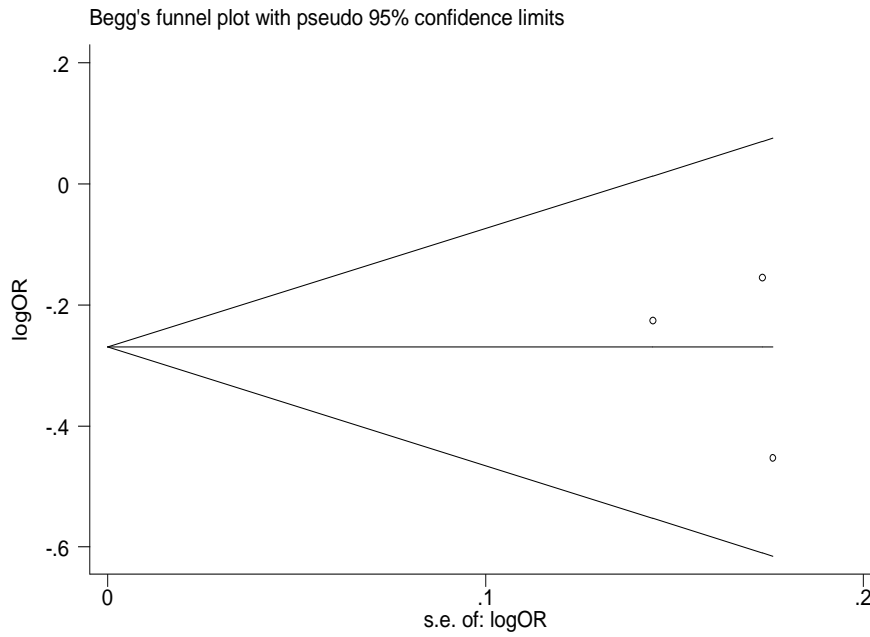

**Supplementary Figure S7.9.** Meta-analysis of *ATM* rs664677 (Dominant: CC+CT vs. TT).

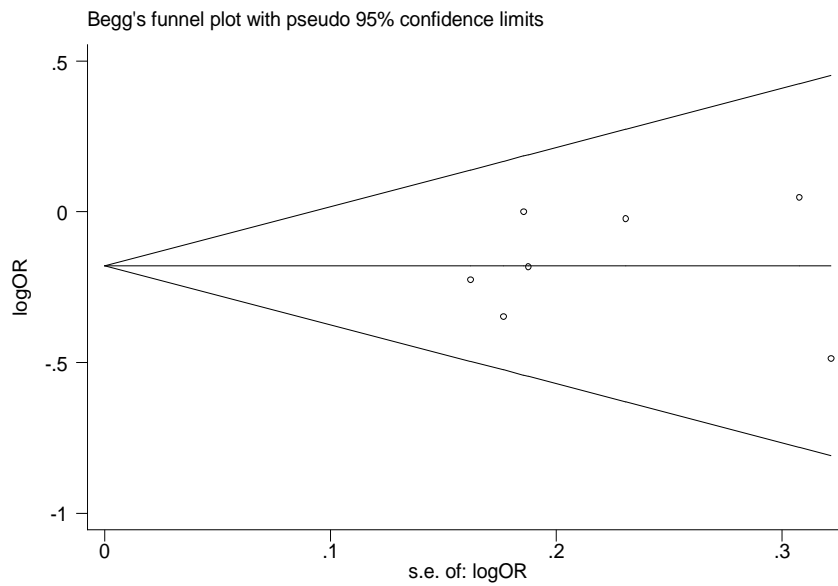

**Supplementary Figure S7.10.** Subgroup meta-analysis of *APEX1* rs1130409 in Caucasian (Recessive: GG+GT vs. TT).

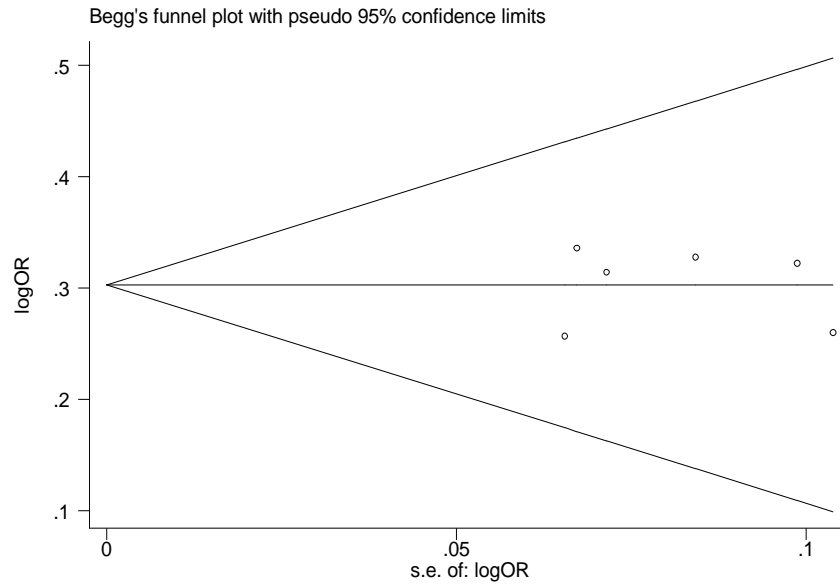

**Supplementary Figure S7.11.** Subgroup meta-analysis of *CHRNA5* rs16969968 in Caucasian (allelic contrast: A vs. G).

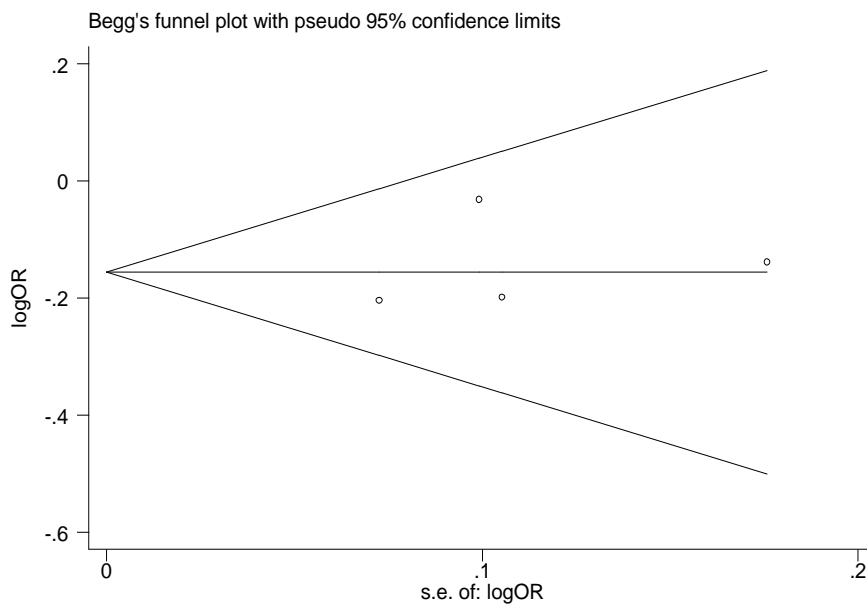

**Supplementary Figure S7.12.** Subgroup meta-analysis of *CLPTMIL* rs402710 in Caucasian (allelic contrast: T vs. C).

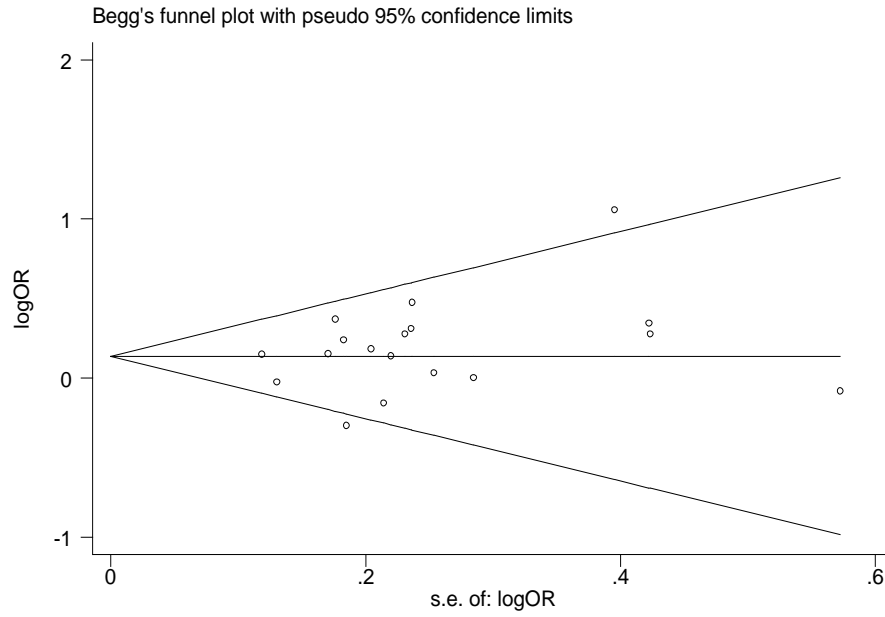

**Supplementary Figure S7.13.** Subgroup meta-analysis of *ERCC2* rs13181 in Caucasian (Recessive: AA vs. CC+CA).

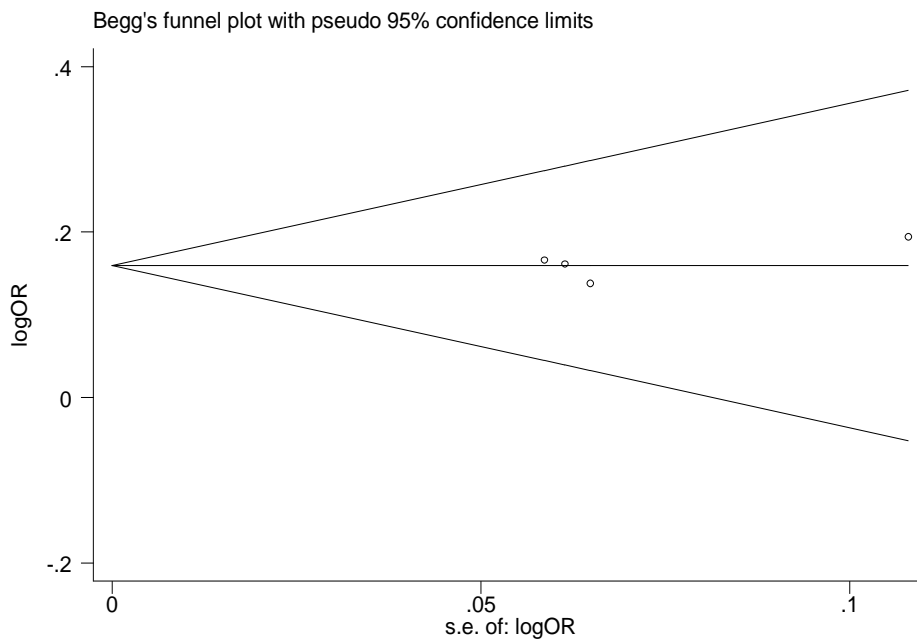

**Supplementary Figure S7.14.** Subgroup meta-analysis of *SOD2* rs4880 in Caucasian (allelic contrast: T vs. C).

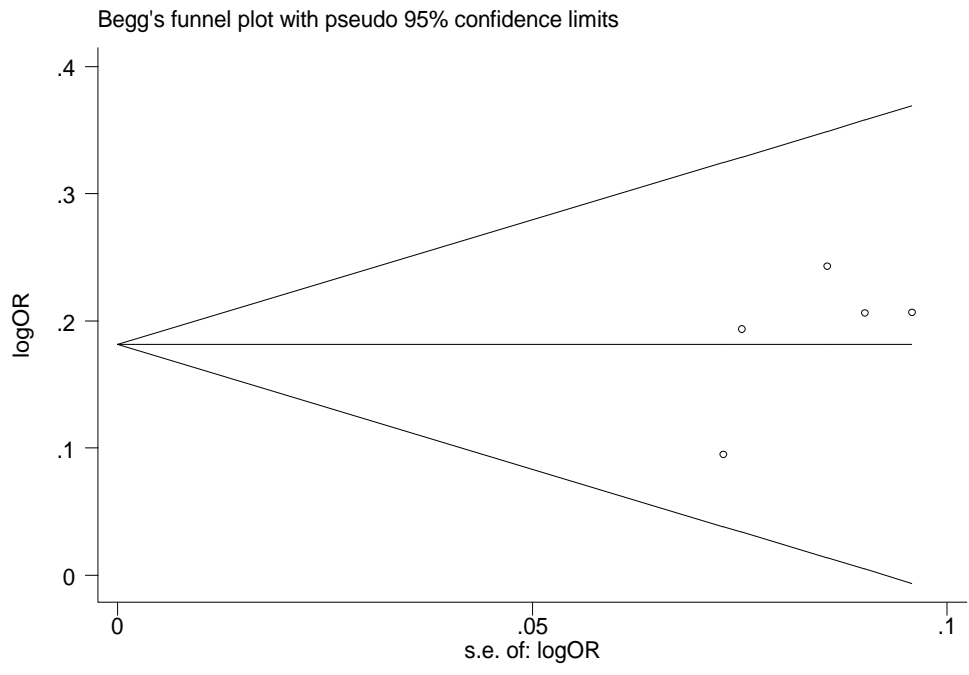

**Supplementary Figure S7.15.** Subgroup meta-analysis of *APEXI* rs1760944 in Asian (allelic contrast: A vs. C).

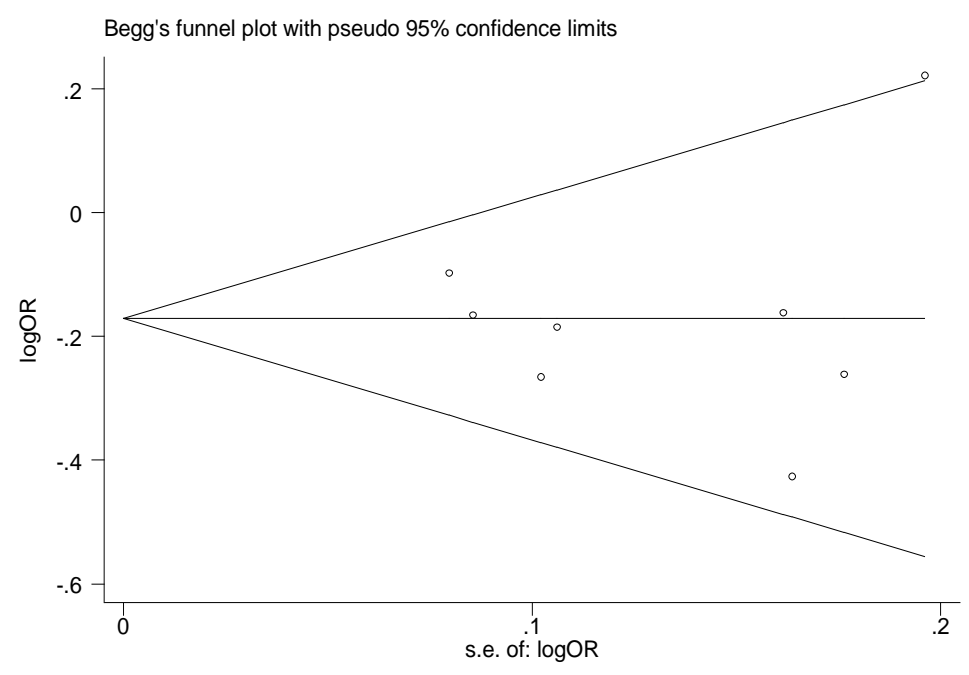

**Supplementary Figure S7.16.** Subgroup meta-analysis of *CLPTMIL* rs402710 in Asian (Dominant: TT+TC vs. CC).

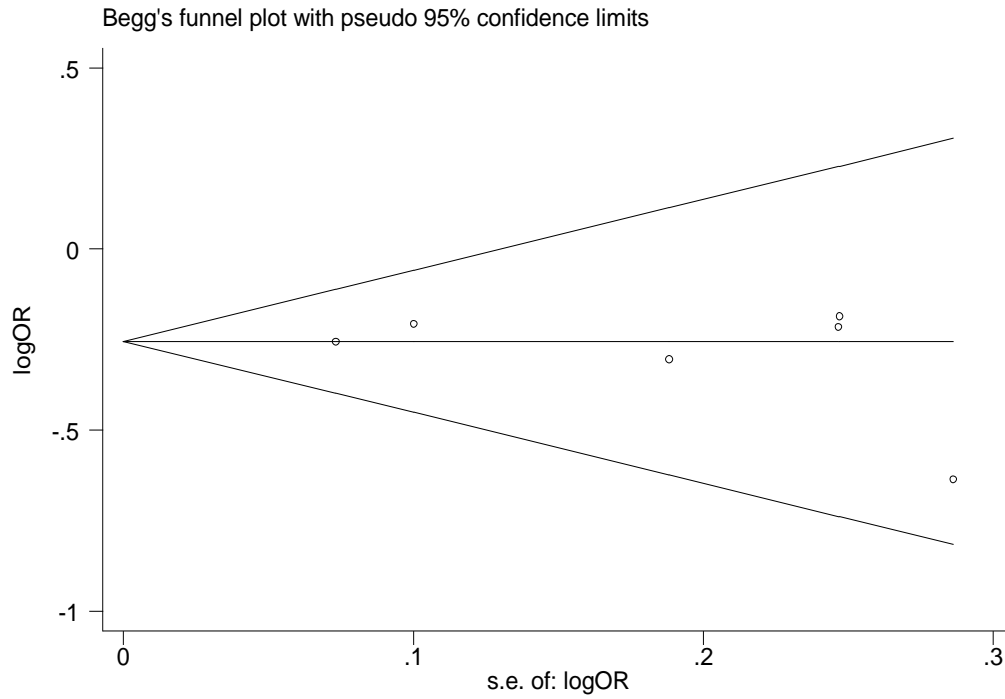

**Supplementary Figure S7.17.** Subgroup meta-analysis of *CYP2E1* rs6413432 in Asian (allelic contrast: A vs. T).

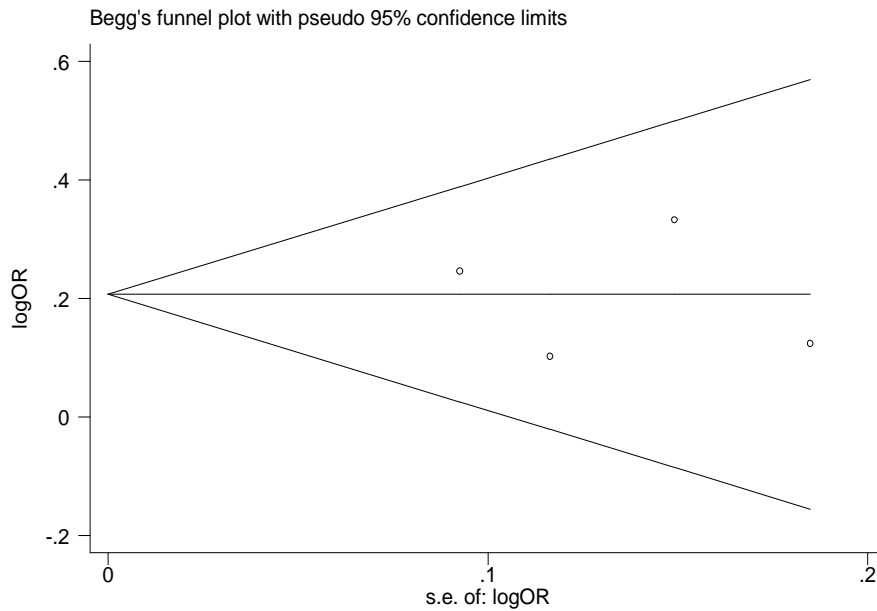

**Supplementary Figure S7.18.** Subgroup meta-analysis of *MIR146A* rs2910164 in Asian (Recessive: GG vs. CC+CG).

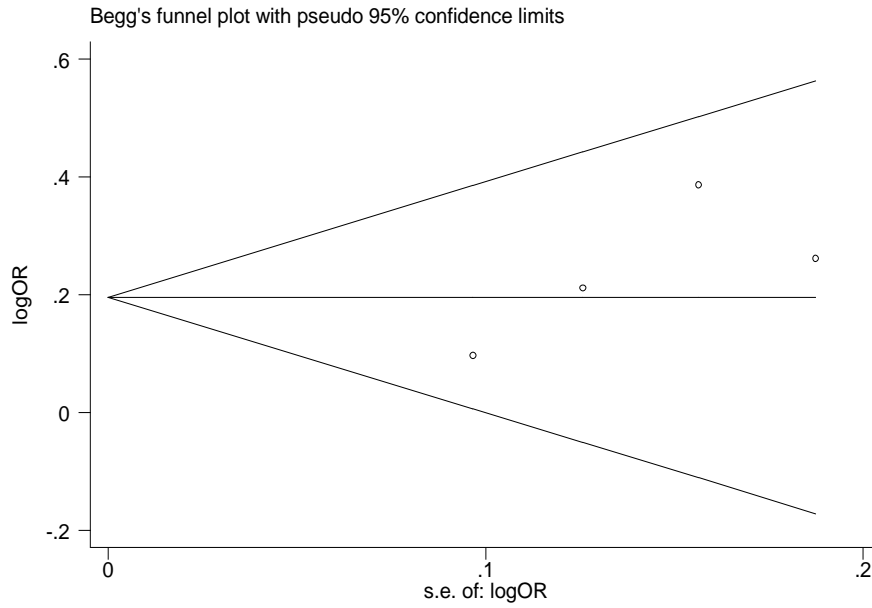

**Supplementary Figure S7.19.** Subgroup meta-analysis of *MIR196A2* rs11614913 in Asian (Dominant: CC+CT vs. TT).

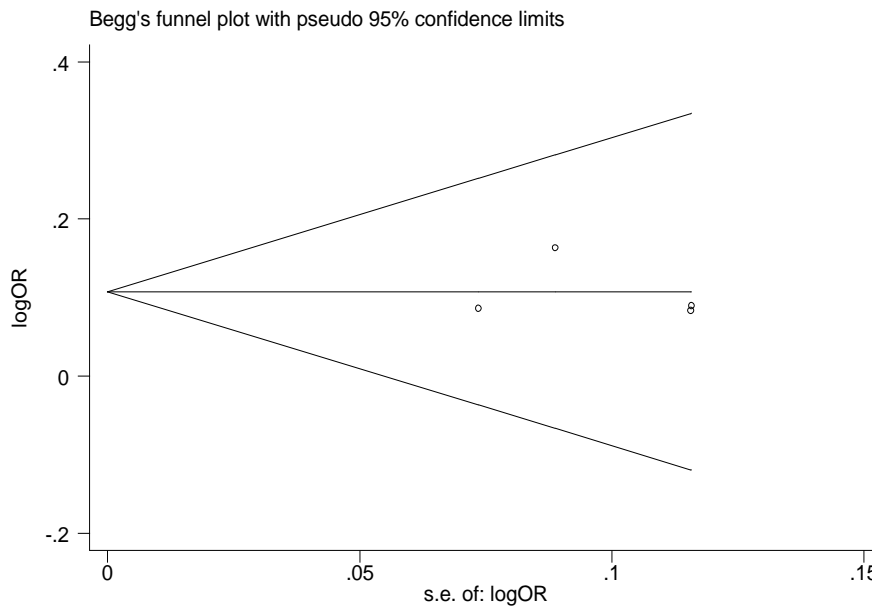

**Supplementary Figure S7.20.** Subgroup meta-analysis of *REV3L* rs462779 in Asian (allelic contrast: T vs. C).

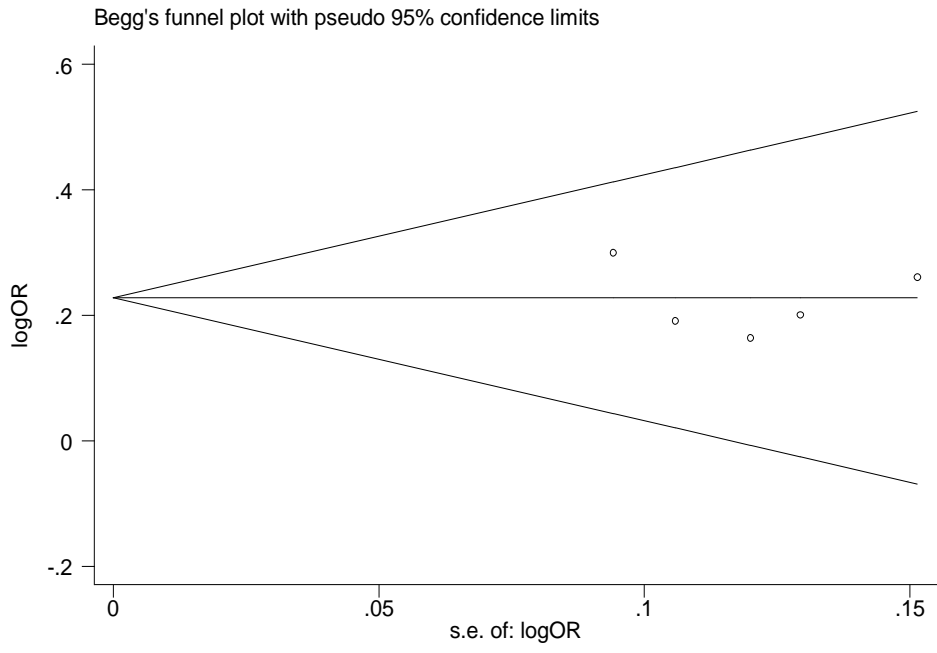

**Supplementary Figure S7.21.** Subgroup meta-analysis of *TERT* rs2736098 in Asian (Dominant: AA+AG vs. GG).

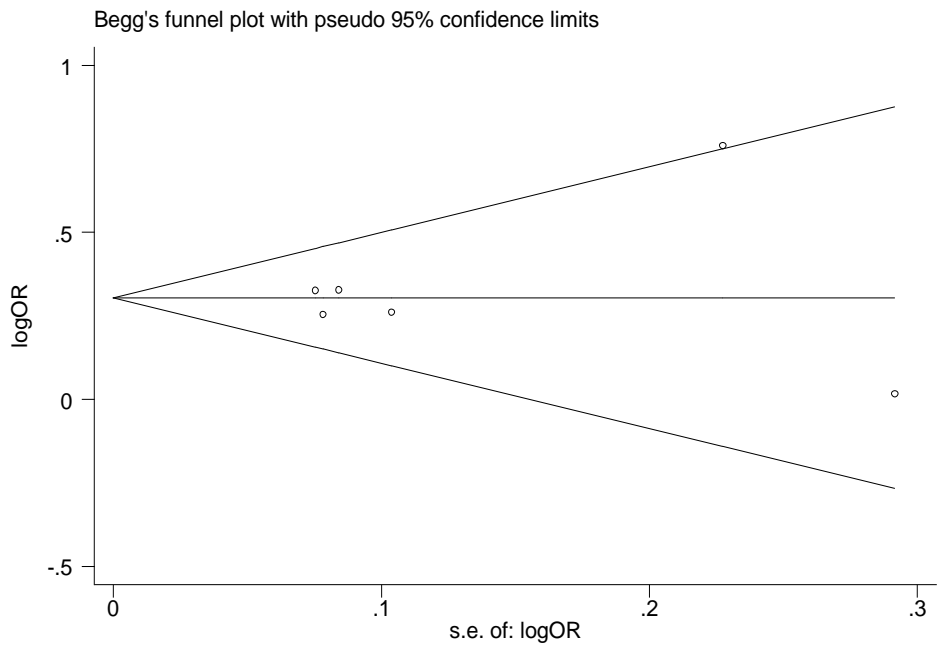

**Supplementary Figure S7.22.** Subgroup meta-analysis of *CHRNA5* rs16969968 in non-small cell lung cancer population (allelic contrast: A vs. G).



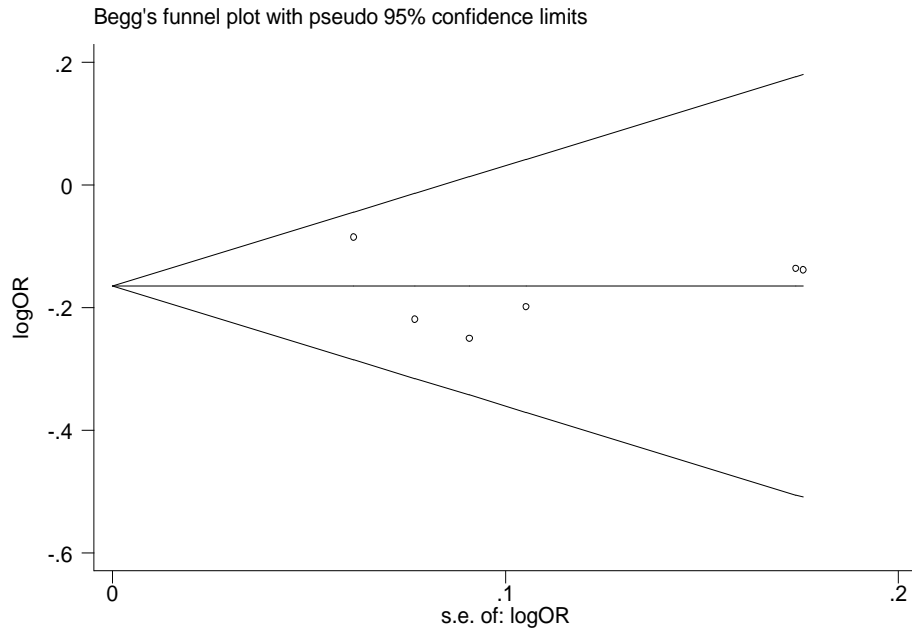

**Supplementary Figure S7.23.** Subgroup meta-analysis of *CLPTMIL* rs402710 in non-small cell lung cancer population (allelic contrast: T vs. C).

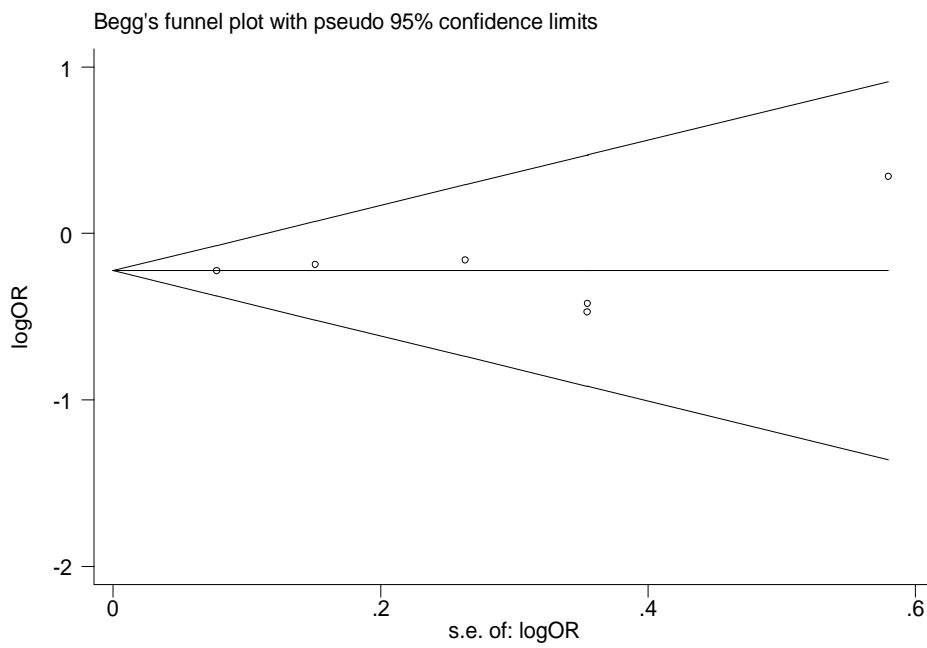

**Supplementary Figure S7.24.** Subgroup meta-analysis of *CYP2E1* rs6413432 in non-small cell lung cancer population (allelic contrast: A vs. T).

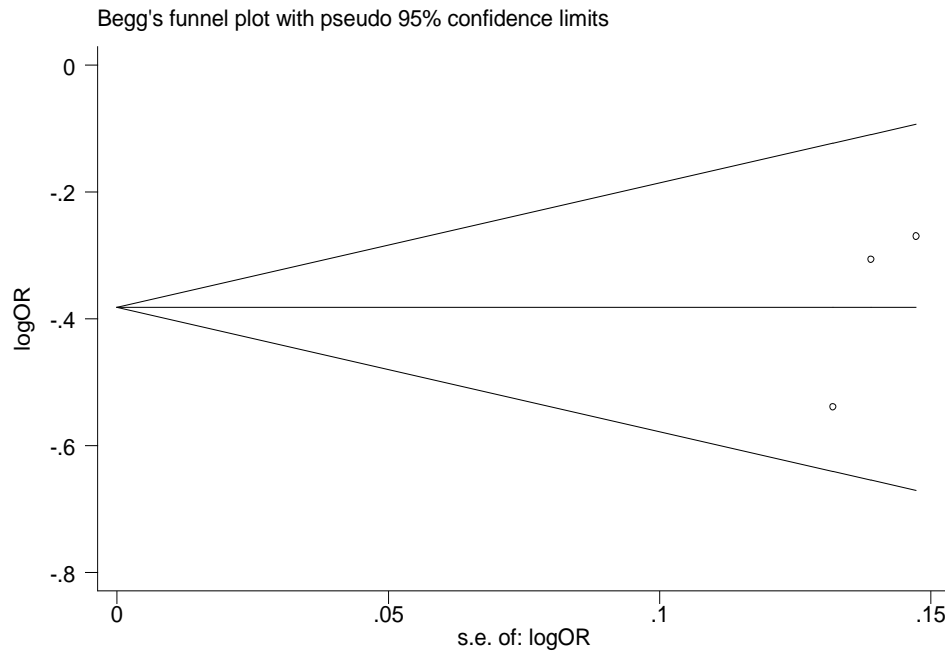

**Supplementary Figure S7.25.** Subgroup meta-analysis of *ERCC1* rs11615 in non-small cell lung cancer population (allelic contrast: C vs. T).

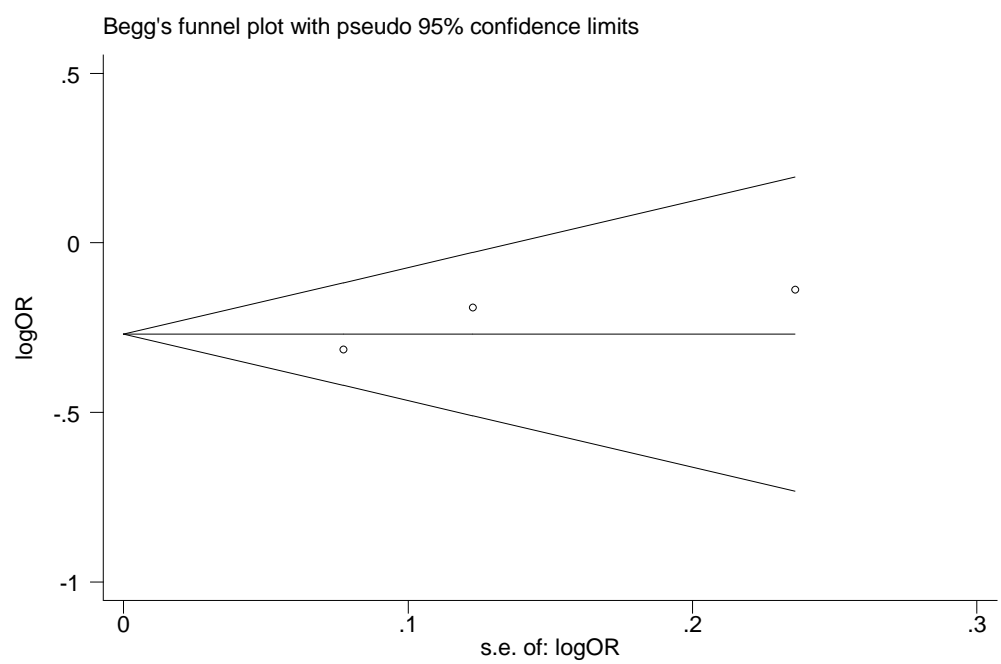

**Supplementary Figure S7.26.** Subgroup meta-analysis of *FGFR4* rs351855 in non-small cell lung cancer population (allelic contrast: A vs. G).

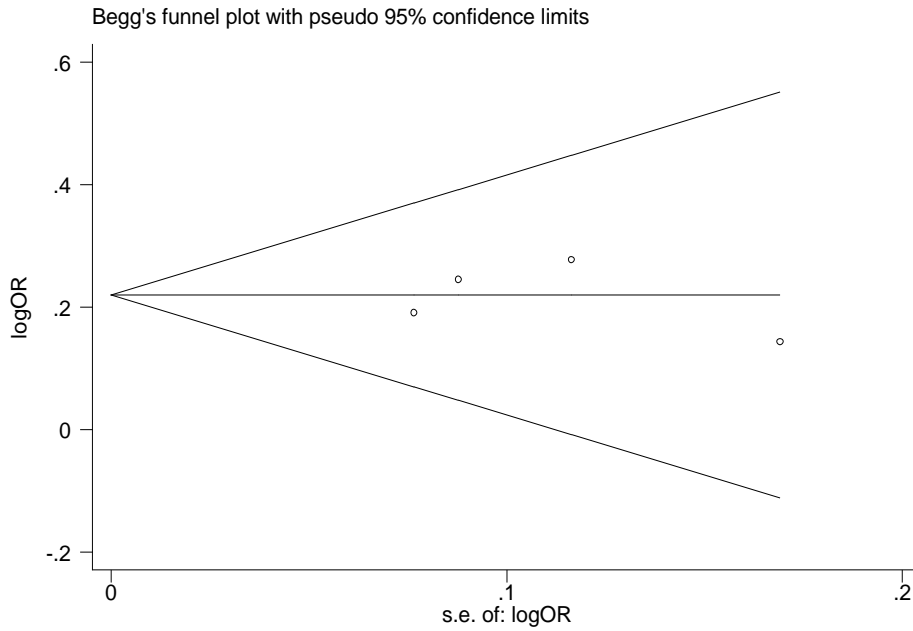

**Supplementary Figure S7.27.** Subgroup meta-analysis of *HYKK* rs931794 in non-small cell lung cancer population (allelic contrast: G vs. A).

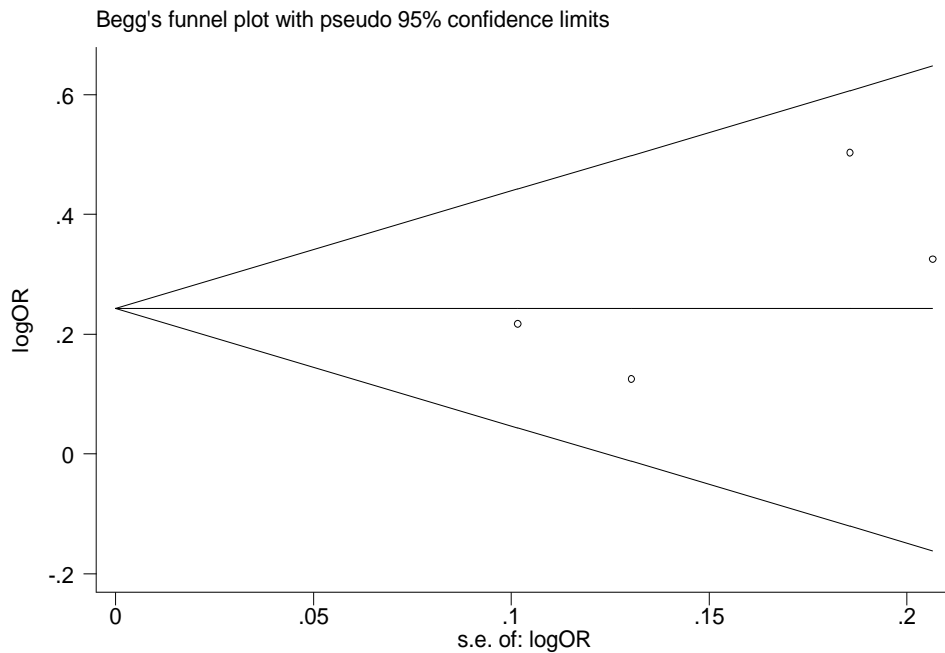

**Supplementary Figure S7.28.** Subgroup meta-analysis of *MIR146A* rs2910164 in non-small cell lung cancer population (allelic contrast: C vs. G).

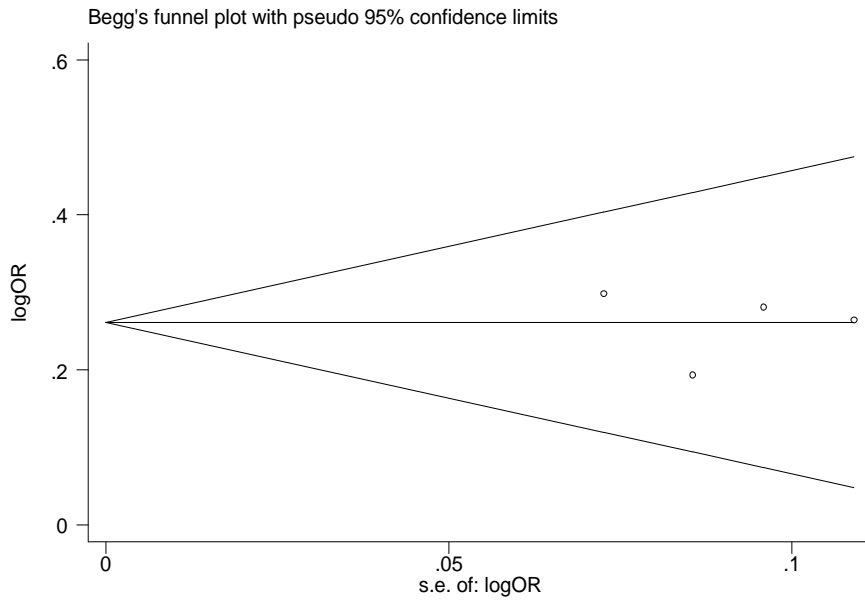

**Supplementary Figure S7.29.** Subgroup meta-analysis of *TERT* rs2736098 in non-small cell lung cancer population (allelic contrast: A vs. G).

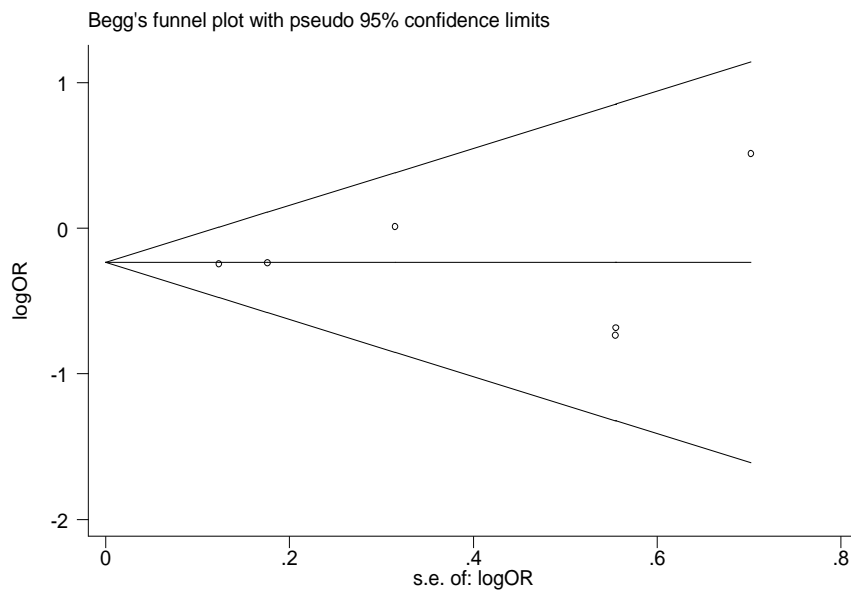

**Supplementary Figure S7.30.** Subgroup meta-analysis of *CYP2E1* rs6413432 in adenocarcinoma population (allelic contrast: A vs. T).

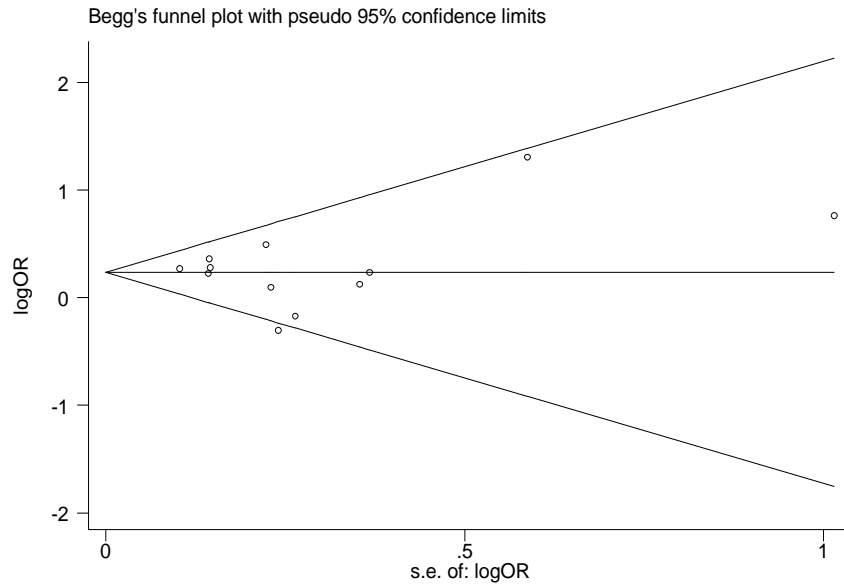

**Supplementary Figure S7.31.** Subgroup meta-analysis of *OGG1* rs1052133 in adenocarcinoma population (Recessive: CC vs. GG+GC).

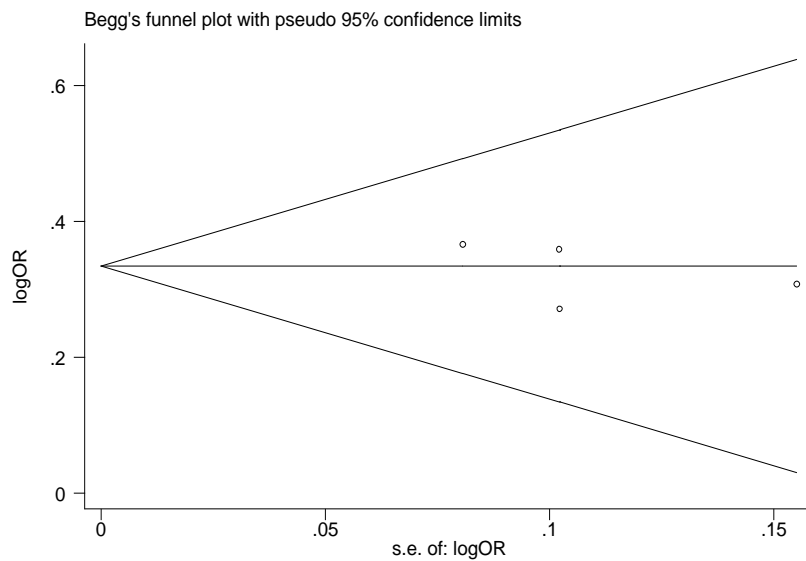

**Supplementary Figure S7.32.** Subgroup meta-analysis of *TERT* rs2736098 in adenocarcinoma population (allelic contrast: A vs. G).

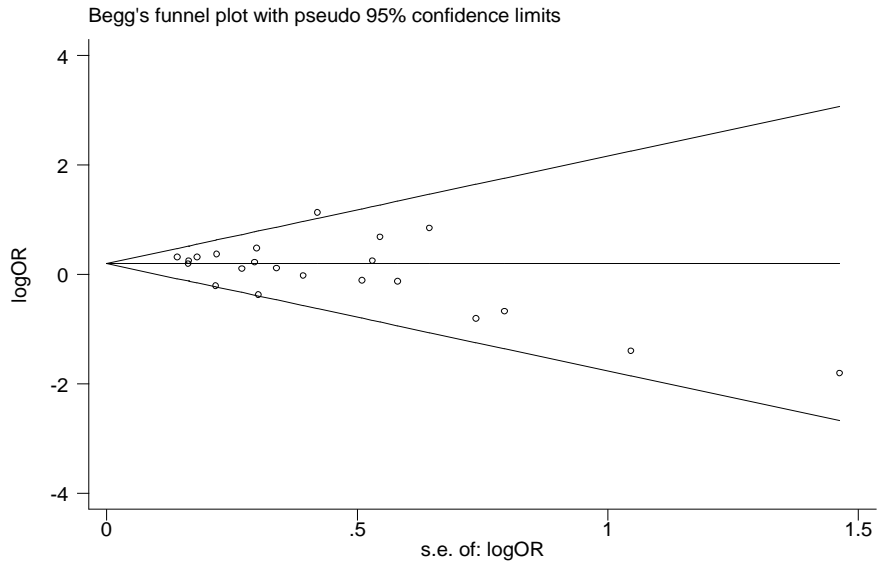

**Supplementary Figure S7.33.** Subgroup meta-analysis of *TP53* rs1042522 in adenocarcinoma population (Recessive: GG vs. CC+CG).

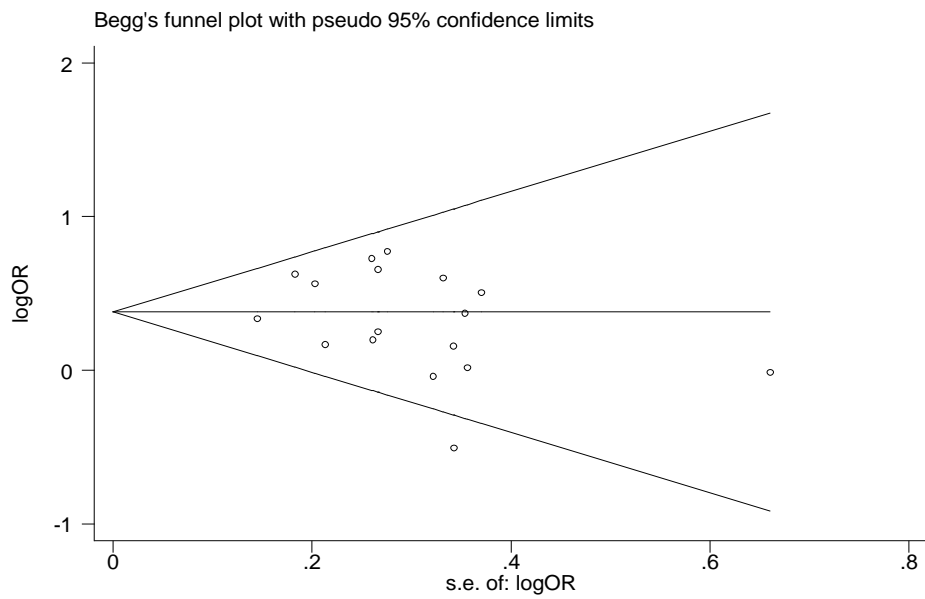

**Supplementary Figure S7.34.** Subgroup meta-analysis of *CYP1A1* rs4646903 in squamous cell carcinoma population (allelic contrast: C vs. T).

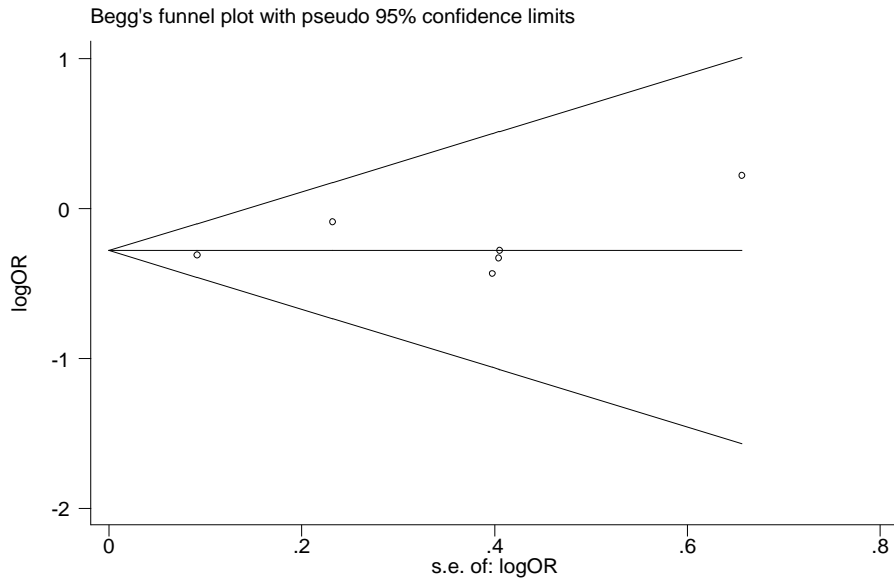

**Supplementary Figure S7.35.** Subgroup meta-analysis of *CYP2E1* rs6413432 in squamous cell carcinoma population (allelic contrast: A vs. T).

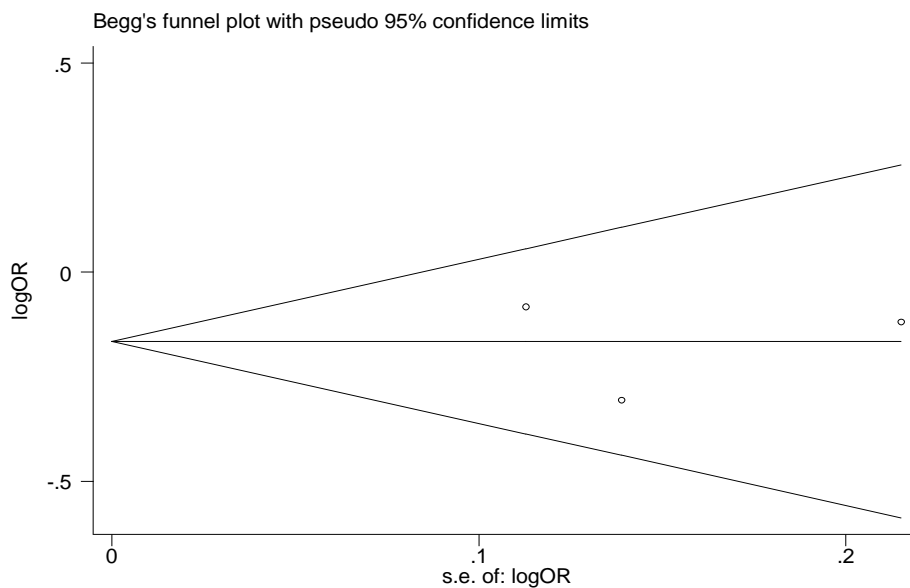

**Supplementary Figure S7.36.** Subgroup meta-analysis of *ERCC1* rs11615 in non-smokers (allelic contrast: C vs. T).

**Supplementary Figure S7.** Begg's funnel plots of main or subgroup meta-analyses for variants showed significant associations to lung cancer susceptibility with strong cumulative evidence. Begg's funnel plots were used for publication bias test. Each point represented a separate study. LogOR, natural

logarithm of OR. Horizontal line, mean effect size. The degree of asymmetry of the funnel plots were evaluated by the Begg's test, and all P-value of Begg's test were displayed on the respective table in the manuscript.



**Supplementary Table S1. Genetic associations with lung cancer risk for all 246 variants analyzed in main meta-analyses under different genetic models** (Continued on next three pages)

| Gene           | Variant                                      | Chr | Category       | Ethnicity | Comparison*    | Frequency(%) <sup>b</sup> | Number evaluated |                | Lung cancer risk meta-analysis in allelic model |                       |       |         |                    |        |            | Dominant model        |                 |                       | Recessive model    |                 |                        |                    |
|----------------|----------------------------------------------|-----|----------------|-----------|----------------|---------------------------|------------------|----------------|-------------------------------------------------|-----------------------|-------|---------|--------------------|--------|------------|-----------------------|-----------------|-----------------------|--------------------|-----------------|------------------------|--------------------|
|                |                                              |     |                |           |                |                           | Studies          | Cases/Controls | OR(95% CI)                                      | P value               | Q     | P for Q | I <sup>2</sup> (%) | Begg P | Modified P | Excess P <sup>c</sup> | OR(95% CI)      | P value               | I <sup>2</sup> (%) | OR(95% CI)      | P value                | I <sup>2</sup> (%) |
| <i>ABCB1</i>   | rs1045642(p.Ile1145Ile,c.3435T>C)            | 7   | synonymous     | All       | T vs C         | 39.40                     | 4                | 1025/1080      | 1.30(0.79-2.16)                                 | 0.307                 | 28.98 | 0.00    | 90                 | 0.308  | 0.555      | 1.000                 | 1.21(0.67-2.19) | 0.535                 | 83                 | 1.34(0.72-2.50) | 0.353                  | 79                 |
| <i>ACE</i>     | 287-bp repeat(ID)                            | 17  | STR            | All       | Ins vs del     | 49.31                     | 8                | 1730/8359      | 1.01(0.85-1.21)                                 | 0.885                 | 19.95 | 0.01    | 65                 | 0.536  | 0.627      | 0.019                 | 1.00(0.76-1.32) | 0.985                 | 57                 | 1.00(0.76-1.33) | 0.998                  | 66                 |
| <i>AGER</i>    | rs1800624(-374T>A,Mum1)                      | 6   | intergenic     | Asian     | A vs T         | 34.41                     | 3                | 1656/1693      | 1.18(1.04-1.33)                                 | 0.010                 | 2.38  | 0.31    | 16                 | 1.000  | 0.480      | 1.000                 | 1.34(0.97-1.85) | 0.077                 | 72                 | 1.18(0.95-1.46) | 0.127                  | 0                  |
| <i>AGER</i>    | rs1800625(-429T>C,Alu1)                      | 6   | intergenic     | Asian     | C vs T         | 31.19                     | 3                | 1656/1693      | 1.16(0.78-1.74)                                 | 0.468                 | 20.99 | 0.00    | 91                 | 1.000  | 0.741      | 0.232                 | 1.20(0.74-1.68) | 0.598                 | 85                 | 1.52(0.52-4.42) | 0.443                  | 90                 |
| <i>AGER</i>    | rs2070600(p.Gly82Ser,c.244G>A)               | 6   | non-synonymous | All       | A vs G         | 31.57                     | 4                | 2104/2178      | 1.10(0.93-1.31)                                 | 0.270                 | 7.15  | 0.07    | 58                 | 0.089  | 0.003      | 0.110                 | 1.17(0.81-1.70) | 0.408                 | 83                 | 1.15(0.77-1.72) | 0.502                  | 57                 |
| <i>AHR</i>     | rs2066853(Arg554Lys,Ex10+501G>A)             | 7   | non-synonymous | All       | A vs G         | 30.44                     | 5                | 1749/1925      | 0.96(0.84-1.10)                                 | 0.567                 | 5.82  | 0.21    | 31                 | 1.000  | 0.922      | 1.000                 | 0.95(0.74-1.22) | 0.703                 | 63                 | 0.96(0.78-1.18) | 0.699                  | 0                  |
| <i>ALDH2</i>   | rs671(p.Glu487Lys,Glu504Lys,c.1510G>A)       | 12  | non-synonymous | All       | A vs G         | 24.03                     | 3                | 1555/2079      | 1.36(0.74-2.50)                                 | 0.322                 | 29.62 | 0.00    | 93                 | 1.000  | 0.724      | 1.000                 | 1.16(0.72-1.88) | 0.539                 | 89                 | 1.10(0.53-2.29) | 0.793                  | 63                 |
| <i>APEX1</i>   | rs1760944(c.-468T>G,-141T>G)                 | 14  | 5'UTR          | All       | A vs G         | 47.94                     | 8                | 3588/3783      | 1.16(1.08-1.25)                                 | 2.85×10 <sup>-5</sup> | 7.70  | 0.36    | 9                  | 0.386  | 0.119      | 0.287                 | 1.21(1.02-1.44) | 0.030                 | 55                 | 1.24(1.11-1.38) | 1.54×10 <sup>-4</sup>  | 0                  |
| <i>APEX1</i>   | rs1048945(p.Gln51His,c.153G>C)               | 14  | non-synonymous | Caucasian | C vs G         | 4.72                      | 3                | 745/816        | 0.93(0.67-1.31)                                 | 0.684                 | 0.30  | 0.86    | 0                  | 1.000  | 0.500      | 1.000                 |                 |                       |                    |                 |                        |                    |
| <i>APEX1</i>   | rs1130409(p.Asp148Glu,c.444T>G)              | 14  | non-synonymous | All       | G vs T         | 42.30                     | 21               | 6479/8565      | 1.00(0.93-1.09)                                 | 0.922                 | 34.22 | 0.02    | 45                 | 1.000  | 0.985      | 0.023                 | 1.07(0.96-1.19) | 0.224                 | 56                 | 0.97(0.84-1.13) | 0.731                  | 56                 |
| <i>APEX1</i>   | rs2307486(p.Ile64Val,c.190A>G)               | 14  | non-synonymous | All       | G vs A         | 6.97                      | 4                | 2281/2505      | 0.82(0.63-1.06)                                 | 0.121                 | 6.35  | 0.10    | 53                 | 0.089  | 0.119      | 0.567                 |                 |                       |                    |                 |                        |                    |
| <i>ATM</i>     | rs609429(IVS48+238C>G)                       | 11  | intron         | All       | (GG+GC) vs CC  | 54.72                     | 3                | 1490/1501      | 0.82(0.66-1.03)                                 | 0.086                 | 3.02  | 0.22    | 34                 | 1.000  | 0.495      | 0.515                 | 0.82(0.66-1.03) | 0.086                 | 34                 |                 |                        |                    |
| <i>ATM</i>     | rs664677(IVS21T-77C)                         | 11  | intron         | All       | C vs T         | 58.90                     | 3                | 1627/1641      | 0.91(0.82-1.00)                                 | 0.056                 | 1.82  | 0.40    | 0                  | 1.000  | 0.427      | 1.000                 | 0.76(0.64-0.92) | 0.004                 | 0                  | 0.97(0.85-1.11) | 0.680                  | 0                  |
| <i>ATM</i>     | rs189037(c.-111G>A,-4519G>A)                 | 11  | 5'UTR          | Asian     | A vs T         | 42.68                     | 5                | 3036/3415      | 1.09(1.00-1.18)                                 | 0.050                 | 5.65  | 0.23    | 29                 | 0.806  | 0.195      | 1.000                 | 1.10(0.98-1.23) | 0.105                 | 9                  | 1.16(1.01-1.33) | 0.043                  | 20                 |
| <i>ATM</i>     | rs664143(IVS34G+60A)                         | 11  | intron         | All       | (GG+GA) vs AA  | 45.53                     | 3                | 1465/1465      | 0.93(0.79-1.10)                                 | 0.392                 | 1.61  | 0.45    | 0                  | 0.296  | 0.088      | 1.000                 | 0.93(0.79-1.10) | 0.392                 | 0                  |                 |                        |                    |
| <i>AURKA</i>   | rs2273535(p.Phe318Val,c.91T>A)               | 20  | non-synonymous | Caucasian | A vs T         | 48.28                     | 20               | 2301/2069      | 0.96(0.86-1.06)                                 | 0.421                 | 0.63  | 0.73    | 0                  | 0.296  | 0.383      | 1.000                 | 0.97(0.83-1.14) | 0.723                 | 0                  | 0.88(0.57-1.34) | 0.547                  | 61                 |
| <i>AURKA</i>   | rs1047972(p.Ile57Val,c.169A>G)               | 20  | non-synonymous | Caucasian | A vs T         | 15.75                     | 3                | 2463/2283      | 0.96(0.86-1.06)                                 | 0.425                 | 1.65  | 0.44    | 0                  | 0.296  | 0.167      | 1.000                 | 0.97(0.86-1.11) | 0.681                 | 0                  | 0.77(0.53-1.11) | 0.156                  | 0                  |
| <i>AXIN2</i>   | rs2240308(p.Pro50Ser,c.148C>T)               | 17  | non-synonymous | All       | T vs G         | 37.40                     | 3                | 758/742        | 0.73(0.63-0.85)                                 | 6.39×10 <sup>-5</sup> | 1.84  | 0.40    | 0                  | 1.000  | 0.120      | 0.251                 | 0.69(0.56-0.85) | 3.98×10 <sup>-4</sup> | 0                  | 0.55(0.34-0.89) | 0.015                  | 32                 |
| <i>BCL2</i>    | rs2279115(c.-938C>A)                         | 18  | 5'UTR          | All       | A vs C         | 43.37                     | 5                | 1847/2367      | 0.65(0.46-0.91)                                 | 0.011                 | 45.33 | 0.00    | 91                 | 0.624  | 0.035      | 0.481                 | 0.59(0.39-0.90) | 0.014                 | 88                 | 0.59(0.41-0.84) | 0.004                  | 80                 |
| <i>BIRC5</i>   | rs9904341(c.-31G>C)                          | 17  | 5'UTR          | All       | C vs G         | 43.56                     | 5                | 1008/963       | 1.23(0.80-1.88)                                 | 0.352                 | 27.16 | 0.00    | 85                 | 0.806  | 0.925      | 0.051                 | 1.07(0.65-1.77) | 0.783                 | 78                 | 1.75(0.99-3.12) | 0.056                  | 70                 |
| <i>BRCA2</i>   | rs144848(p.Asn372His,c.1114A>C)              | 13  | non-synonymous | All       | C vs A         | 23.94                     | 4                | 1586/2513      | 1.00(0.82-1.21)                                 | 0.959                 | 6.90  | 0.08    | 57                 | 0.734  | 0.734      | 1.000                 |                 |                       |                    |                 |                        |                    |
| <i>CASC8</i>   | rs1447295(C>A)                               | 8   | intron         | All       | A vs C         | 14.41                     | 3                | 1541/2057      | 1.00(0.88-1.14)                                 | 0.991                 | 1.52  | 0.47    | 0                  | 1.000  | 0.440      | 1.000                 | 0.96(0.80-1.15) | 0.658                 | 33                 | 1.43(0.90-2.26) | 0.129                  | 0                  |
| <i>CASC8</i>   | rs6983267(T>G)                               | 8   | intron         | All       | G vs T         | 44.77                     | 3                | 1539/1989      | 1.14(0.95-1.38)                                 | 0.166                 | 7.70  | 0.02    | 74                 | 0.296  | 0.223      | 0.263                 | 1.16(0.81-1.66) | 0.409                 | 83                 | 1.22(1.04-1.44) | 0.013                  | 0                  |
| <i>CASP5</i>   | rs523104(p.Leu318Val,c.748C>G)               | 11  | non-synonymous | All       | G vs T         | 36.90                     | 3                | 758/943        | 1.12(0.98-1.29)                                 | 0.105                 | 1.18  | 0.55    | 0                  | 1.000  | 0.371      | 1.000                 | 1.09(0.90-1.33) | 0.378                 | 0                  | 1.32(0.94-1.86) | 0.113                  | 33                 |
| <i>CASP8</i>   | rs3834129(-652 G del,-CTTACT)                | 2   | intergenic     | All       | Del vs non-del | 27.82                     | 4                | 2737/2696      | 0.95(0.77-1.17)                                 | 0.631                 | 16.45 | 0.00    | 82                 | 0.308  | 0.167      | 0.275                 | 0.93(0.73-1.17) | 0.526                 | 76                 | 0.98(0.72-1.32) | 0.890                  | 52                 |
| <i>CASP8</i>   | rs1045485(p.Asp302His,c.853G>C)              | 2   | non-synonymous | All       | C vs G         | 10.96                     | 4                | 1054/1259      | 1.20(0.97-1.49)                                 | 0.101                 | 4.02  | 0.26    | 25                 | 1.000  | 0.186      | 0.460                 | 1.25(1.00-1.56) | 0.056                 | 20                 | 0.90(0.42-1.91) | 0.781                  | 0                  |
| <i>CCND1</i>   | rs678653(G>C)                                | 11  | 3'UTR          | All       | C vs G         | 29.98                     | 3                | 1323/1901      | 1.03(0.85-1.24)                                 | 0.773                 | 5.03  | 0.08    | 60                 | 1.000  | 0.347      | 1.000                 | 0.99(0.76-1.27) | 0.905                 | 62                 | 1.09(0.87-1.35) | 0.464                  | 0                  |
| <i>CCND1</i>   | rs9344(rs603965,p.Pro241Pro,c.723G>A)        | 11  | synonymous     | All       | A vs G         | 48.82                     | 11               | 6058/7315      | 1.02(0.92-1.12)                                 | 0.696                 | 30.90 | 0.00    | 68                 | 0.533  | 0.927      | 0.007                 | 0.98(0.85-1.12) | 0.745                 | 55                 | 1.07(0.90-1.26) | 0.460                  | 69                 |
| <i>CD3EAP</i>  | rs967591(c.-21G>A)                           | 19  | 5'UTR          | All       | A vs G         | 32.09                     | 3                | 676/726        | 1.23(1.01-1.49)                                 | 0.036                 | 2.56  | 0.28    | 22                 | 1.000  | 0.988      | 1.000                 | 1.38(0.92-2.07) | 0.119                 | 62                 | 1.30(0.97-1.78) | 0.105                  | 0                  |
| <i>CDKN1A</i>  | rs1801270(p.Ser31Arg,c.93C>A,6829C>A)        | 6   | non-synonymous | All       | A vs C         | 13.18                     | 9                | 4039/4804      | 1.04(0.89-1.21)                                 | 0.663                 | 16.82 | 0.03    | 52                 | 0.029  | 0.280      | 0.280                 | 1.08(0.88-1.32) | 0.483                 | 61                 | 0.92(0.73-1.16) | 0.489                  | 0                  |
| <i>CDKN2A</i>  | rs3731249(p.Ala148Thr,c.442G>A)              | 9   | non-synonymous | Caucasian | (AA+AG) vs GG  | 1.75                      | 3                | 2875/2707      | 1.38(0.81-2.35)                                 | 0.230                 | 4.56  | 0.10    | 56                 | 0.296  | 0.177      | 1.000                 | 1.38(0.81-2.35) | 0.230                 | 56                 |                 |                        |                    |
| <i>Chr8q24</i> | rs16901979(C>A)                              | 8   | intergenic     | All       | A vs G         | 19.48                     | 3                | 1534/1992      | 1.15(0.99-1.35)                                 | 0.065                 | 3.29  | 0.19    | 39                 | 1.000  | 0.259      | 1.000                 | 1.18(1.02-1.37) | 0.025                 | 0                  | 1.22(0.80-1.86) | 0.352                  | 51                 |
| <i>CHRNA3</i>  | rs12914385(2594C>T)                          | 15  | intron         | All       | T vs C         | 35.09                     | 4                | 5356/2873      | 1.20(1.01-1.44)                                 | 0.044                 | 12.27 | 0.01    | 76                 | 0.734  | 0.353      | 1.000                 | 1.26(1.00-1.57) | 0.047                 | 70                 | 1.34(1.04-1.71) | 0.022                  | 49                 |
| <i>CHRNA3</i>  | rs3743073(A>C)                               | 15  | intron         | All       | G vs T         | 43.53                     | 3                | 1391/1500      | 1.27(0.89-1.83)                                 | 0.191                 | 23.05 | 0.00    | 91                 | 0.296  | 0.088      | 1.000                 | 1.37(0.95-1.98) | 0.094                 | 80                 | 1.32(0.72-2.44) | 0.368                  | 91                 |
| <i>CHRNA3</i>  | rs578776(C>T)                                | 15  | intron         | All       | T vs C         | 31.98                     | 3                | 1245/2009      | 0.87(0.77-0.98)                                 | 0.018                 | 0.19  | 0.91    | 0                  | 1.000  | 0.969      | 0.576                 | 0.84(0.72-0.98) | 0.026                 | 0                  | 0.84(0.66-1.07) | 0.162                  | 0                  |
| <i>CHRNA3</i>  | rs938682(T>C,r.788965/47C)                   | 15  | intron         | All       | C vs T         | 28.37                     | 3                | 1240/1986      | 0.86(0.76-0.96)                                 | 0.009                 | 1.08  | 0.58    | 0                  | 0.296  | 0.054      | 1.000                 |                 |                       |                    |                 |                        |                    |
| <i>CHRNA3</i>  | rs6495309(4064C>T)                           | 15  | 5'UTR          | All       | T vs C         | 38.44                     | 4                | 3381/4244      | 0.83(0.77-0.89)                                 | 6.55×10 <sup>-5</sup> | 2.78  | 0.43    | 0                  | 1.000  | 0.727      | 1.000                 | 0.78(0.71-0.86) | 9.82×10 <sup>-7</sup> | 0                  | 0.81(0.68-0.95) | 0.010                  | 37                 |
| <i>CHRNA5</i>  | rs14277241(rs3841324,-62ins[del.22bp indel]) | 15  | 5'UTR          | All       | Del vs ins     | 37.67                     | 3                | 1431/1606      | 0.92(0.83-1.03)                                 | 0.131                 | 2.02  | 0.36    | 1                  | 1.000  | 0.828      | 1.000                 | 0.96(0.83-1.11) | 0.571                 | 0                  | 0.80(0.65-0.98) | 0.032                  | 0                  |
| <i>CHRNA5</i>  | rs1696968(p.Asp398Asn,c.1192G>A)             | 15  | non-synonymous | All       | A vs A         | 32.51                     | 11               | 6222/62452     | 1.23(1.06-1.43)                                 | 0.007                 | 48.96 | 0.00    | 80                 | 0.119  | 0.131      | 0.071                 | 1.26(1.01-1.59) | 0.045                 | 85                 | 1.49(1.32-1.68) | 5.18×10 <sup>-11</sup> | 0                  |
| <i>CLPTM1L</i> | rs402710(C>T)                                | 5   | intron         | All       | T vs C         | 32.92                     | 13               | 7214/8051      | 0.89(0.83-0.95)                                 | 2.63×10 <sup>-5</sup> | 19.48 | 0.08    | 38                 | 0.669  | 0.437      | 0.335                 | 0.84(0.78-0.90) | 2.42×10 <sup>-2</sup> | 0                  | 0.81(0.71-0.93) | 0.002                  | 24                 |
| <i>COMT</i>    | rs4680(p.Val158Met,c.472G>A)                 | 22  | non-synonymous | All       | A vs T         | 29.90                     | 5                | 1497/1958      | 1.09(0.84-1.43)                                 | 0.517                 | 21.84 | 0.00    | 82                 | 0.806  | 0.920      | 0.077                 | 1.13(0.87-1.45) | 0.366                 | 63                 | 1.12(0.66-1.90) | 0.674                  | 77                 |
| <i>CRP</i>     | rs2808630(T>C)                               | 1   | 3'UTR          | All       | C vs T         | 27.26                     | 3                | 826/895        | 0.82(0.68-1.01)                                 | 0.056                 | 2.79  | 0.25    | 28                 | 1.000  | 0.859      | 1.000                 | 0.81(0.61-1.07) | 0.155                 | 44                 | 0.71(0.48-1.04) | 0.080                  | 0                  |
| <i>CTLA4</i>   | rs3087243(p.Ala119Ser,c.355G>T,m2)           | 2   | 3'UTR          | All       | A vs G         | 26.64                     | 3                | 1132/1220      | 0.99(0.86-1.14)                                 | 0.887                 | 1.05  | 0.59    | 0                  | 0.296  | 0.158      | 1.000                 | 1.05(0.88-1.26) | 0.566                 | 0                  | 0.81(0.59-1.11) | 0.184                  | 0                  |
| <i>CTLA4</i>   | rs231775(p.Thr17Ala,c.49A>G)                 | 2   | non-synonymous | All       | G vs A         | 61.94                     | 6                | 2828/2953      | 0.88(0.64-1.21)                                 | 0.                    |       |         |                    |        |            |                       |                 |                       |                    |                 |                        |                    |

| Gene   | Variant                                                                                        | Chr | Category         | Ethnicity | Comparison*     | Frequency(%) <sup>b</sup> | Number evaluated |                | Lung cancer risk meta-analysis in allelic model |                        |        |         |                    |        |            | Dominant model        |                 |                       | Recessive model    |                 |                       |                    |  |
|--------|------------------------------------------------------------------------------------------------|-----|------------------|-----------|-----------------|---------------------------|------------------|----------------|-------------------------------------------------|------------------------|--------|---------|--------------------|--------|------------|-----------------------|-----------------|-----------------------|--------------------|-----------------|-----------------------|--------------------|--|
|        |                                                                                                |     |                  |           |                 |                           | Studies          | Cases/Controls | OR(95% CI)                                      | P value                | Q      | P for Q | I <sup>2</sup> (%) | Begg P | Modified P | Excess P <sup>2</sup> | OR(95% CI)      | P value               | I <sup>2</sup> (%) | OR(95% CI)      | P value               | I <sup>2</sup> (%) |  |
| ELANE  | rs7254054(-741G>A,REP_b)                                                                       | 19  | 5'UTR            | Caucasian | A vs G          | 27.20                     | 3                | 754/750        | 0.77(0.61-0.97)                                 | 0.030                  | 3.72   | 0.16    | 46                 | 0.296  | 0.022      | 0.567                 | 0.77(0.63-0.95) | 0.014                 | 0                  | 0.50(0.18-1.38) | 0.183                 | 81                 |  |
| EPHX1  | rs1051740(p.Tyr113His,c.337T>C)                                                                | 1   | non-synonymous   | All       | C vs T          | 31.81                     | 21               | 3461/7217      | 1.05(0.89-1.24)                                 | 0.564                  | 106.98 | 0.00    | 81                 | 0.057  | 0.153      | 0.000                 | 1.05(0.86-1.28) | 0.633                 | 77                 | 1.01(0.79-1.28) | 0.951                 | 61                 |  |
| EPHX1  | rs2234922(p.His139Arg,c.416A>G)                                                                | 1   | non-synonymous   | All       | G vs A          | 18.85                     | 23               | 5582/9556      | 1.12(0.99-1.28)                                 | 0.076                  | 69.15  | 0.00    | 68                 | 0.051  | 0.032      | 0.289                 | 1.15(1.00-1.33) | 0.059                 | 65                 | 1.09(0.88-1.35) | 0.428                 | 18                 |  |
| ERCC1  | rs11615(rs3177700,p.Asn118Asn,c.354T>C)                                                        | 19  | synonymous       | All       | C vs T          | 51.18                     | 12               | 5731/7058      | 0.90(0.83-0.99)                                 | 0.023                  | 22.97  | 0.02    | 52                 | 0.086  | 0.072      | 0.434                 | 0.86(0.73-1.00) | 0.048                 | 51                 | 0.89(0.80-1.00) | 0.051                 | 31                 |  |
| ERCC1  | rs16979802(15310G>C)                                                                           | 19  | intron           | Caucasian | C vs G          | 21.81                     | 3                | 1311/2114      | 0.87(0.74-1.03)                                 | 0.102                  | 0.87   | 0.65    | 0                  | 1.000  | 0.444      | 1.000                 | 0.91(0.73-1.13) | 0.399                 | 0                  | 0.75(0.45-1.26) | 0.281                 | 15                 |  |
| ERCC1  | rs2298881(262G>T,C>A)                                                                          | 19  | intron           | All       | T vs G          | 29.82                     | 4                | 3049/3791      | 0.99(0.91-1.07)                                 | 0.723                  | 3.50   | 0.32    | 14                 | 0.308  | 0.727      | 1.000                 | 0.96(0.86-1.07) | 0.439                 | 0                  | 1.02(0.88-1.18) | 0.799                 | 0                  |  |
| ERCC1  | rs3212948(C>G)                                                                                 | 19  | intron           | All       | G vs C          | 56.25                     | 5                | 2144/2544      | 1.04(0.89-1.22)                                 | 0.591                  | 10.24  | 0.04    | 61                 | 0.642  | 0.568      | 0.243                 | 1.05(0.81-1.11) | 0.523                 | 3                  | 1.13(0.94-1.36) | 0.181                 | 34                 |  |
| ERCC1  | rs3212955(A>G)                                                                                 | 19  | intron           | All       | G vs A          | 26.05                     | 4                | 2271/2845      | 1.08(0.98-1.18)                                 | 0.109                  | 2.42   | 0.49    | 0                  | 0.734  | 0.744      | 1.000                 | 0.96(0.94-1.20) | 0.350                 | 10                 | 1.21(0.96-1.53) | 0.107                 | 39                 |  |
| ERCC1  | rs3212961(IVS5+33C>A,17677C>A)                                                                 | 19  | intron           | All       | A vs C          | 35.50                     | 6                | 2207/2311      | 0.94(0.86-1.03)                                 | 0.167                  | 4.90   | 0.43    | 0                  | 1.000  | 0.704      | 1.000                 | 1.03(0.81-1.07) | 0.321                 | 0                  | 0.97(0.74-1.28) | 0.848                 | 37                 |  |
| ERCC1  | rs3212986(8092C>A,14443C>A)                                                                    | 19  | 3'UTR            | All       | A vs C          | 26.25                     | 5                | 4079/4475      | 1.00(0.94-1.08)                                 | 0.931                  | 1.63   | 0.80    | 0                  | 0.806  | 0.929      | 1.000                 | 1.01(0.93-1.10) | 0.846                 | 0                  | 0.99(0.84-1.17) | 0.894                 | 0                  |  |
| ERCC1  | rs735482(p.Lys261Thr,A>C)                                                                      | 19  | non-synonymous   | All       | C vs A          | 19.32                     | 5                | 1682/2797      | 1.02(0.91-1.15)                                 | 0.709                  | 4.34   | 0.36    | 8                  | 0.462  | 0.490      | 1.000                 | 1.02(0.85-1.22) | 0.830                 | 25                 | 1.14(0.86-1.51) | 0.359                 | 0                  |  |
| ERCC2  | rs1052555(Asp711Asp,G>A)                                                                       | 19  | synonymous       | All       | A vs G          | 18.91                     | 3                | 511/751        | 1.09(0.85-1.40)                                 | 0.493                  | 2.95   | 0.23    | 32                 | 0.296  | 0.145      | 1.000                 |                 |                       |                    |                 |                       |                    |  |
| ERCC2  | rs1711440(A>C)                                                                                 | 19  | intron           | All       | C vs A          | 34.69                     | 3                | 511/751        | 1.04(0.87-1.26)                                 | 0.645                  | 0.61   | 0.74    | 0                  | 1.000  | 0.716      | 1.000                 |                 |                       |                    |                 |                       |                    |  |
| ERCC2  | rs13181(p.Lys751Gln,c.2251A>C)                                                                 | 19  | non-synonymous   | All       | C vs A          | 25.26                     | 40               | 13111/16749    | 1.12(1.05-1.19)                                 | 4.18x10 <sup>-4</sup>  | 76.17  | 0.00    | 49                 | 0.753  | 0.272      | 0.048                 | 1.16(1.08-1.26) | 1.26x10 <sup>-4</sup> | 40                 | 1.15(1.01-1.30) | 0.034                 | 41                 |  |
| ERCC2  | rs1799787(IVS19-70C>T,G>A)                                                                     | 19  | intron           | All       | T vs C          | 21.34                     | 6                | 1792/2807      | 1.03(0.83-1.27)                                 | 0.824                  | 10.74  | 0.06    | 54                 | 1.000  | 0.996      | 0.171                 | 1.02(0.81-1.28) | 0.872                 | 49                 | 1.07(0.61-1.88) | 0.807                 | 25                 |  |
| ERCC2  | rs1799793(p.Asp312Asn,c.981G>A)                                                                | 19  | non-synonymous   | All       | A vs T          | 23.17                     | 26               | 10209/12967    | 1.02(0.95-1.09)                                 | 0.637                  | 43.81  | 0.01    | 43                 | 0.628  | 0.578      | 0.182                 | 1.02(0.96-1.09) | 0.498                 | 1                  | 1.10(0.97-1.25) | 0.129                 | 14                 |  |
| ERCC2  | rs238406(p.Arg156Arg,C>A)                                                                      | 19  | synonymous       | All       | A vs C          | 40.05                     | 6                | 1754/2688      | 1.12(1.02-1.23)                                 | 0.013                  | 3.94   | 0.56    | 0                  | 0.260  | 0.332      | 0.599                 | 1.08(0.93-1.25) | 0.303                 | 11                 | 1.30(1.10-1.52) | 0.001                 | 0                  |  |
| ERCC4  | rs1799801(p.Ser835Ser,Ex11-247T>C)                                                             | 16  | synonymous       | All       | C vs T          | 27.99                     | 3                | 1009/1758      | 1.02(0.88-1.17)                                 | 0.835                  | 2.16   | 0.34    | 8                  | 1.000  | 0.786      | 1.000                 |                 |                       |                    |                 |                       |                    |  |
| ERCC4  | rs1800067(Arg415Gln)                                                                           | 16  | non-synonymous   | Caucasian | A vs G          | 6.78                      | 5                | 1521/2420      | 1.10(0.92-1.32)                                 | 0.286                  | 1.19   | 0.88    | 0                  | 0.806  | 0.952      | 1.000                 | 1.12(0.92-1.37) | 0.261                 | 0                  | 1.63(0.51-5.22) | 0.413                 | 20                 |  |
| ERCC5  | rs1047768(p.His46His,335C>T)                                                                   | 13  | synonymous       | All       | T vs G          | 43.99                     | 4                | 1449/2248      | 0.86(0.74-1.00)                                 | 0.049                  | 5.78   | 0.12    | 48                 | 0.734  | 0.414      | 1.000                 | 0.92(0.80-1.06) | 0.256                 | 0                  | 0.76(0.61-0.94) | 0.013                 | 32                 |  |
| ERCC5  | rs17655(p.Asp1104His,c.3310G>C)                                                                | 13  | non-synonymous   | All       | C vs G          | 39.06                     | 10               | 3528/4481      | 0.96(0.84-1.10)                                 | 0.525                  | 29.83  | 0.00    | 70                 | 1.000  | 0.952      | 0.087                 | 0.96(0.77-1.21) | 0.754                 | 72                 | 0.90(0.72-1.12) | 0.352                 | 53                 |  |
| ERCC6  | rs3793784(-6530C>G)                                                                            | 10  | 5'UTR            | All       | C vs G          | 30.82                     | 3                | 1643/1689      | 0.75(0.60-0.92)                                 | 0.007                  | 6.23   | 0.04    | 68                 | 1.000  | 0.550      | 0.167                 |                 |                       |                    |                 |                       |                    |  |
| ERCC6  | rs2228528(p.Gly399Asp,G1275A)                                                                  | 10  | non-synonymous   | All       | T vs C          | 41.74                     | 4                | 1856/2059      | 1.05(0.95-1.15)                                 | 0.365                  | 2.91   | 0.41    | 0                  | 0.734  | 0.556      | 1.000                 |                 |                       |                    |                 |                       |                    |  |
| EXO1   | rs1047840(p.Glu589Lys,c.1765G>A)                                                               | 1   | non-synonymous   | All       | T vs G          | 21.78                     | 3                | 1114/1166      | 1.23(0.96-1.57)                                 | 0.099                  | 6.15   | 0.05    | 68                 | 1.000  | 0.981      | 0.300                 | 1.23(0.85-1.79) | 0.274                 | 78                 | 1.33(0.94-1.88) | 0.105                 | 0                  |  |
| FANCG  | rs2237857(p.Thr297Ile,C1382T)                                                                  | 9   | non-synonymous   | All       | T vs C          | 8.77                      | 3                | 1553/1774      | 0.98(0.68-1.41)                                 | 0.903                  | 4.52   | 0.10    | 56                 | 1.000  | 0.330      | 0.100                 |                 |                       |                    |                 |                       |                    |  |
| FAS    | rs2234767(-1377G>A)                                                                            | 10  | 5'UTR            | All       | A vs G          | 27.07                     | 5                | 4125/3696      | 1.09(0.97-1.22)                                 | 0.153                  | 7.90   | 0.10    | 49                 | 1.000  | 0.770      | 0.171                 | 1.05(0.93-1.18) | 0.480                 | 24                 | 1.30(0.99-1.73) | 0.063                 | 58                 |  |
| FASLG  | rs763110(-844C>T)                                                                              | 14  | 5'UTR            | All       | T vs C          | 34.01                     | 4                | 4004/3639      | 0.83(0.65-1.07)                                 | 0.156                  | 34.08  | 0.00    | 91                 | 0.734  | 0.536      | 0.630                 | 0.80(0.56-1.14) | 0.213                 | 92                 | 0.83(0.70-0.99) | 0.038                 | 30                 |  |
| FGFR4  | rs351855(p.Gly388Arg,G>A)                                                                      | 5   | non-synonymous   | All       | A vs G          | 42.47                     | 4                | 1083/1275      | 0.82(0.69-0.98)                                 | 0.025                  | 4.48   | 0.21    | 33                 | 0.839  | 0.515      | 1.000                 | 0.73(0.61-0.87) | 3.56x10 <sup>-4</sup> | 0                  | 0.87(0.58-1.32) | 0.521                 | 51                 |  |
| GPC3   | rs2352028(C>T)                                                                                 | 13  | intron           | Asian     | T vs C          | 21.65                     | 3                | 1648/2002      | 0.97(0.87-1.09)                                 | 0.611                  | 1.43   | 0.49    | 0                  | 1.000  | 0.765      | 1.000                 |                 |                       |                    |                 |                       |                    |  |
| GPC3   | rs1050450(p.Pro200Leu,c.599C>T)                                                                | 3   | non-synonymous   | Caucasian | T vs C          | 34.06                     | 4                | 976/1339       | 1.04(0.75-1.44)                                 | 0.811                  | 16.02  | 0.00    | 81                 | 0.734  | 0.934      | 0.157                 | 1.11(0.72-1.71) | 0.632                 | 80                 | 0.93(0.54-1.59) | 0.785                 | 71                 |  |
| GSTM1  | Present/Null(Large gene deletion)                                                              | 1   | phenotype        | All       | Null vs present | 48.85                     | 133              | 33253/37867    | 1.18(1.12-1.23)                                 | 2.54x10 <sup>-11</sup> | 269.09 | 0.00    | 52                 | 0.105  | 0.037      | 0.011                 |                 |                       |                    |                 |                       |                    |  |
| GSTM3  | rs1799735(c.468+21delAGC,3bp deletion,*A/*B)                                                   | 1   | intron           | All       | Del vs non-del  | 17.64                     | 8                | 1749/2069      | 0.97(0.86-1.09)                                 | 0.608                  | 3.43   | 0.84    | 0                  | 0.902  | 0.668      | 1.000                 |                 |                       |                    |                 |                       |                    |  |
| GSTP1  | rs1138272(p.Ala114Val,c.341C>T)                                                                | 11  | non-synonymous   | Caucasian | T vs C          | 7.63                      | 6                | 1479/1573      | 1.24(0.93-1.65)                                 | 0.149                  | 10.60  | 0.06    | 53                 | 1.000  | 0.529      | 0.177                 | 1.18(0.90-1.55) | 0.236                 | 63                 | 1.96(0.50-1.63) | 0.728                 | 54                 |  |
| GSTP1  | rs1695(p.Ile105Val,c.313A>G)                                                                   | 11  | non-synonymous   | All       | G vs A          | 30.41                     | 46               | 12521/14411    | 1.08(1.02-1.15)                                 | 0.011                  | 100.57 | 0.00    | 55                 | 0.075  | 0.009      | 0.008                 | 1.08(1.00-1.16) | 0.059                 | 55                 | 1.11(1.01-1.22) | 0.035                 | 13                 |  |
| GSTT1  | Present/Null(Large gene deletion)                                                              | 22  | phenotype        | All       | Null vs present | 26.14                     | 77               | 23009/25365    | 1.10(1.02-1.19)                                 | 0.011                  | 179.38 | 0.00    | 58                 | 0.346  | 0.345      | 0.000                 |                 |                       |                    |                 |                       |                    |  |
| HIF1A  | rs11549465(p.Pro582Ser,c.174C>T)                                                               | 14  | non-synonymous   | All       | T vs C          | 13.60                     | 3                | 509/566        | 1.19(0.50-2.86)                                 | 0.690                  | 18.09  | 0.00    | 89                 | 1.000  | 0.488      | 0.293                 | 1.19(0.51-2.76) | 0.688                 | 86                 |                 |                       |                    |  |
| HIF1A  | rs11549467(p.Ala588Thr,c.1762G>A)                                                              | 14  | non-synonymous   | All       | A vs G          | 9.45                      | 3                | 509/566        | 2.27(1.74-2.96)                                 | 1.62x10 <sup>-6</sup>  | 1.47   | 0.48    | 0                  | 0.296  | 0.261      | 0.610                 | 2.15(1.56-2.95) | 2.51x10 <sup>-6</sup> | 0                  |                 |                       |                    |  |
| HRAS1  | common alleles (rare alleles/HRAS1 VNTR alleles, loss of heterozygosity in the 15p15.5 region) | 11  | combined variant | Caucasian | rare vs common  | 7.03                      | 4                | 746/1174       | 2.55(1.01-6.45)                                 | 0.048                  | 9.56   | 0.02    | 69                 | 0.734  | 0.561      | 0.346                 |                 |                       |                    |                 |                       |                    |  |
| HYKK   | rs931794(A>G)                                                                                  | 15  | intron           | All       | G vs A          | 32.89                     | 5                | 2435/3180      | 1.23(1.14-1.34)                                 | 1.85x10 <sup>-7</sup>  | 1.28   | 0.86    | 0                  | 1.000  | 0.967      | 0.411                 | 1.29(1.15-1.43) | 6.08x10 <sup>-6</sup> | 0                  | 1.35(1.16-1.58) | 1.58x10 <sup>-4</sup> | 0                  |  |
| IFNG   | rs2069705(-1615T>C)                                                                            | 12  | intergenic       | All       | C vs T          | 38.30                     | 3                | 2119/2654      | 1.02(0.93-1.11)                                 | 0.727                  | 2.01   | 0.37    | 0                  | 1.000  | 0.662      | 1.000                 |                 |                       |                    |                 |                       |                    |  |
| IGFBP3 | rs2854744 (C-202A)                                                                             | 7   | intergenic       | Asian     | C vs A          | 27.71                     | 3                | 789/960        | 0.79(0.52-1.20)                                 | 0.262                  | 13.99  | 0.00    | 86                 | 0.296  | 0.298      | 1.000                 | 0.79(0.50-1.26) | 0.328                 | 82                 | 0.57(0.26-1.28) | 0.175                 | 73                 |  |
| IL10   | rs1800871 (c.-854T>C, -819C>T)                                                                 | 1   | 5'UTR            | All       | T vs C          | 30.14                     | 11               | 3269/4627      | 0.93(0.76-1.14)                                 | 0.488                  | 37.41  | 0.00    | 73                 | 0.640  | 0.656      | 0.019                 | 0.90(0.64-1.26) | 0.525                 | 75                 | 0.92(0.69-1.23) | 0.569                 | 60                 |  |
| IL10   | rs1800872 (g.4433A>C, -592C>A)                                                                 | 1   | intergenic       | All       | A vs C          | 35.53                     | 8                | 3710/4965      | 0.90(0.81-1.01)                                 | 0.075                  | 15.64  | 0.03    | 55                 | 0.174  | 0.165      | 0.369                 | 0.86(0.71-1.04) | 0.122                 | 52                 | 0.84(0.63-1.11) | 0.211                 | 61                 |  |
| IL10   | rs1800896 (g.3943A>G, -1082A>G)                                                                | 1   | intergenic       | All       | T vs G          | 37.18                     | 10               | 2861/3817      | 1.29(1.05-1.59)                                 | 0.017                  | 35.95  | 0.00    | 75                 | 0.074  | 0.042      | 1.000                 | 1.49(0.96-2.31) | 0.072                 | 80                 | 1.25(1.00-1.56) | 0.048                 | 0                  |  |
| IL13   | rs1800925 (-1068C>T, -1112C>T)                                                                 | 5   | intergenic       | All       | T vs C          | 21.93                     | 3                | 1788/1920      | 1.02(0.91-1.13)                                 | 0.785                  | 0.91   | 0.64    | 0                  | 0.296  | 0.311      | 1.000                 |                 |                       |                    |                 |                       |                    |  |
| IL13   | rs20541 (Arg130Gln,+2044G>A)                                                                   | 5   | non-synonymous   | All       | G vs A          | 21.66                     | 3                | 1877/2020      | 1.01(0.90-1                                     |                        |        |         |                    |        |            |                       |                 |                       |                    |                 |                       |                    |  |

| Gene     | Variant                                       | Chr | Category                     | Ethnicity | Comparison*              | Frequency(%) <sup>b</sup> | Number evaluated |                | Lung cancer risk meta-analysis in allelic model |                       |         |      |         |                    |        |            |                       |                       | Dominant model |                    |                        | Recessive model |                    |  |
|----------|-----------------------------------------------|-----|------------------------------|-----------|--------------------------|---------------------------|------------------|----------------|-------------------------------------------------|-----------------------|---------|------|---------|--------------------|--------|------------|-----------------------|-----------------------|----------------|--------------------|------------------------|-----------------|--------------------|--|
|          |                                               |     |                              |           |                          |                           | Studies          | Cases/Controls | OR(95% CI)                                      |                       | P value | Q    | P for Q | I <sup>2</sup> (%) | Begg P | Modified P | Excess P <sup>†</sup> | OR(95% CI)            | P value        | I <sup>2</sup> (%) | OR(95% CI)             | P value         | I <sup>2</sup> (%) |  |
|          |                                               |     |                              |           |                          |                           |                  |                | OR(95% CI)                                      | P value               |         |      |         |                    |        |            |                       |                       |                |                    |                        |                 |                    |  |
| MMP9     | rs3918242 (g.3430C>T, -1562 C>T)              | 20  | intergenic                   | All       | T vs C                   | 13.28                     | 3                | 1205/1099      | 0.89(0.69-1.14)                                 | 0.357                 | 3.40    | 0.18 | 41      | 1.000              | 0.987  | 1.000      | 0.92(0.74-1.14)       | 0.438                 | 15             | 0.53(0.13-2.08)    | 0.362                  | 48              |                    |  |
| MPO      | rs2333227 (G-463A)                            | 17  | intron                       | All       | A vs G                   | 20.93                     | 27               | 9595/10754     | 0.92(0.85-1.00)                                 | 0.058                 | 56.29   | 0.00 | 54      | 2.609              | 0.098  | 0.048      | 0.92(0.85-1.00)       | 0.055                 | 38             | 0.92(0.74-1.15)    | 0.471                  | 45              |                    |  |
| MSH3     | rs26279 (p.Ala1045Thr.c.3133G>A)              | 5   | non-synonymous               | All       | G vs A                   | 27.74                     | 4                | 1649/1849      | 0.90(0.75-1.08)                                 | 0.251                 | 6.83    | 0.08 | 56      | 0.734              | 0.688  | 0.447      |                       |                       |                |                    |                        |                 |                    |  |
| MSH6     | rs1042821 (p.Gly39Glu.c.116G>A)               | 2   | non-synonymous               | All       | C vs A                   | 29.44                     | 3                | 1454/1620      | 0.95(0.83-1.08)                                 | 0.415                 | 2.30    | 0.32 | 13      | 0.296              | 1.000  |            |                       |                       |                |                    |                        |                 |                    |  |
| MTHFR    | rs1801131 (p.Ala429Glu.c.1286A>C, A1298C)     | 1   | non-synonymous               | All       | C vs A                   | 24.91                     | 11               | 4125/5131      | 1.07(1.00-1.14)                                 | 0.069                 | 7.93    | 0.64 | 0       | 0.876              | 0.443  | 1.000      | 1.03(0.91-1.16)       | 0.636                 | 38             | 1.22(0.99-1.51)    | 0.067                  | 27              |                    |  |
| MTHFR    | rs1801133 (p.Ala222Val, Ex4+79C>T)            | 1   | non-synonymous               | All       | T vs C                   | 37.83                     | 16               | 8692/8412      | 1.10(0.98-1.24)                                 | 0.125                 | 69.01   | 0.00 | 78      | 0.192              | 0.101  | 0.069      | 1.07(0.92-1.26)       | 0.365                 | 73             | 1.15(0.96-1.37)    | 0.124                  | 62              |                    |  |
| MTR      | rs1805087 (Asp919Gly, A2756G)                 | 1   | non-synonymous               | All       | G vs A                   | 13.88                     | 4                | 2488/3335      | 1.06(0.93-1.22)                                 | 0.387                 | 4.61    | 0.20 | 35      | 1.000              | 0.920  | 0.261      | 1.07(0.88-1.29)       | 0.507                 | 55             | 1.14(0.79-1.63)    | 0.490                  | 0               |                    |  |
| MTRR     | rs1801394 (Ile49Met, A66G)                    | 5   | non-synonymous               | All       | G vs A                   | 43.28                     | 3                | 1668/2291      | 1.13(1.03-1.24)                                 | 0.011                 | 1.29    | 0.53 | 0       | 1.000              | 0.916  | 1.000      | 1.19(1.00-1.42)       | 0.054                 | 23             | 1.15(0.98-1.34)    | 0.086                  | 0               |                    |  |
| MUTYH    | rs3219489 (p.Gln324His, c.972G>C)             | 1   | non-synonymous               | All       | C vs G                   | 31.13                     | 4                | 1250/1137      | 1.10(0.86-1.39)                                 | 0.455                 | 8.17    | 0.04 | 63      | 1.000              | 0.778  | 0.321      | 1.05(0.82-1.34)       | 0.690                 | 41             | 1.25(0.76-2.06)    | 0.372                  | 54              |                    |  |
| MYCL     | L/S(EcoRI)                                    | 1   | the restriction site absence | All       | S vs L                   | 49.65                     | 9                | 636/1004       | 1.05(0.91-1.22)                                 | 0.530                 | 3.99    | 0.86 | 0       | 1.000              | 0.792  | 1.000      | 1.00(0.86-1.40)       | 0.443                 | 0              | 1.03(0.81-1.31)    | 0.132                  | 50              |                    |  |
| NAT2     | Rapid/slow(Acetylation Phenotype)             | 8   | phenotype                    | All       | Slow vs rapid            | 48.33                     | 17               | 3747/4852      | 1.06(0.90-1.25)                                 | 0.502                 | 38.19   | 0.00 | 58      | 0.064              | 0.622  | 0.000      |                       |                       |                |                    |                        |                 |                    |  |
| NAT2     | rs1799929 (p.Leu161Leu, 481C>T)               | 8   | synonymous                   | All       | T vs C                   | 36.88                     | 3                | 576/686        | 1.11(0.87-1.41)                                 | 0.407                 | 4.14    | 0.13 | 52      | 1.000              | 0.717  | 0.257      | 1.36(0.76-2.44)       | 0.308                 | 80             | 1.06(0.72-1.57)    | 0.754                  | 24              |                    |  |
| NAT2     | rs1799930 (p.Arg197Gln, 590G>A, NAT2*6B)      | 8   | non-synonymous               | All       | A vs G                   | 32.47                     | 4                | 712/893        | 1.01(0.81-1.25)                                 | 0.964                 | 5.94    | 0.12 | 50      | 0.734              | 0.903  | 0.107      | 0.97(0.74-1.28)       | 0.831                 | 65             | 1.20(0.82-1.76)    | 0.361                  | 21              |                    |  |
| NBN      | rs1805794 (p.Gln185Glu, Ex5-32C>G, 605C>G)    | 8   | non-synonymous               | All       | G vs C                   | 49.91                     | 8                | 3578/4688      | 0.95(0.80-1.13)                                 | 0.554                 | 41.58   | 0.00 | 83      | 0.174              | 0.292  | 0.001      | 0.93(0.66-1.30)       | 0.662                 | 82             | 0.90(0.72-1.12)    | 0.334                  | 58              |                    |  |
| NFKB1    | rs28362491 (-94ins/delATTG)                   | 4   | intergenic                   | All       | Ins vs del               | 45.72                     | 3                | 935/935        | 1.02(0.72-1.43)                                 | 0.919                 | 11.51   | 0.00 | 83      | 0.296              | 0.355  | 0.003      | 1.04(0.59-1.83)       | 0.892                 | 82             | 1.01(0.69-1.49)    | 0.961                  | 64              |                    |  |
| NOD2     | rs2066847 (3020insC, WT/insC, L1007fs)        | 16  | frameshift                   | All       | Carriers vs non-carriers | 0.50                      | 3                | 807/4078       | 1.42(1.07-1.90)                                 | 0.017                 | 1.04    | 0.59 | 0       | 1.000              | 0.988  | 0.567      | 1.42(1.07-1.90)       | 0.017                 | 0              |                    |                        |                 |                    |  |
| NOQ1     | rs1800566 (p.Pro187Ser, c.648C>T, 609C>T, *2) | 16  | non-synonymous               | All       | T vs C                   | 29.63                     | 23               | 5088/6381      | 1.02(0.92-1.14)                                 | 0.670                 | 54.88   | 0.00 | 60      | 0.398              | 0.598  | 0.031      | 1.03(0.92-1.16)       | 0.586                 | 56             | 1.06(0.86-1.31)    | 0.586                  | 45              |                    |  |
| OGG1     | rs1052133 (p.Ser326Cys, c.977C>G, 8055C>G)    | 3   | non-synonymous               | All       | G vs C                   | 38.90                     | 33               | 11944/14309    | 1.04(0.97-1.11)                                 | 0.243                 | 76.29   | 0.00 | 58      | 0.914              | 0.970  | 0.000      | 1.06(0.96-1.17)       | 0.289                 | 54             | 1.11(1.00-1.24)    | 0.052                  | 41              |                    |  |
| PADPRP   | A/B (a 193-bp deletion)                       | 13  | STR                          | All       | Del vs non-del           | 34.59                     | 3                | 288/292        | 1.13(0.70-1.82)                                 | 0.617                 | 6.42    | 0.04 | 69      | 0.296              | 0.331  | 0.168      | 1.24(0.71-2.18)       | 0.451                 | 59             | 1.09(0.51-2.31)    | 0.829                  | 46              |                    |  |
| PARP1    | rs1136410 (p.Val762Ala, Ex17+8T>C)            | 1   | non-synonymous               | All       | T vs C                   | 41.02                     | 6                | 3192/2874      | 1.01(0.89-1.15)                                 | 0.842                 | 12.64   | 0.03 | 60      | 1.000              | 0.313  | 0.170      | 1.05(0.88-1.27)       | 0.572                 | 36             | 1.11(0.88-1.40)    | 0.372                  | 43              |                    |  |
| PCNA     | rs25406(2232C>T)                              | 20  | intron                       | All       | T vs C                   | 38.63                     | 4                | 970/1302       | 0.91(0.77-1.06)                                 | 0.231                 | 4.99    | 0.17 | 40      | 0.734              | 0.345  | 1.000      | 0.91(0.76-1.10)       | 0.322                 | 0              | 0.91(0.52-1.60)    | 0.741                  | 77              |                    |  |
| PDCD5    | rs1862214 (G>A)                               | 19  | intergenic                   | All       | G vs C                   | 32.06                     | 3                | 737/683        | 1.32(1.12-1.56)                                 | 0.001                 | 1.86    | 0.40 | 0       | 0.296              | 0.136  | 1.000      | 1.42(1.13-1.77)       | 0.002                 | 0              | 1.54(0.83-2.87)    | 0.173                  | 58              |                    |  |
| POLD1    | rs1726801 (p.Arg119His, c.356G>A)             | 19  | non-synonymous               | Asian     | A vs G                   | 19.30                     | 3                | 1263/1420      | 1.11(0.96-1.28)                                 | 0.168                 | 1.61    | 0.45 | 0       | 0.296              | 0.073  | 1.000      |                       |                       |                |                    |                        |                 |                    |  |
| POL1     | rs3730668 (-78G>T)                            | 18  | intergenic                   | All       | T vs G                   | 58.99                     | 3                | 672/823        | 0.94(0.80-1.09)                                 | 0.397                 | 0.63    | 0.73 | 0       | 1.000              | 0.688  | 1.000      |                       |                       |                |                    |                        |                 |                    |  |
| POL1     | rs8305 (Thr706Ala, 2180A>G)                   | 18  | non-synonymous               | All       | G vs A                   | 25.24                     | 4                | 1655/2593      | 1.09(0.98-1.20)                                 | 0.111                 | 2.17    | 0.54 | 0       | 0.734              | 0.250  | 0.379      |                       |                       |                |                    |                        |                 |                    |  |
| POLL     | rs3730477 (p.Arg438Trp, 1683C>T)              | 10  | non-synonymous               | All       | T vs C                   | 3.66                      | 3                | 1356/1542      | 1.29(0.69-2.40)                                 | 0.425                 | 4.07    | 0.13 | 51      | 1.000              | 0.503  | 0.347      |                       |                       |                |                    |                        |                 |                    |  |
| PONI     | rs662 (p.Gln192Arg, c.575A>G)                 | 7   | non-synonymous               | All       | A vs G                   | 46.70                     | 3                | 995/834        | 0.77(0.67-0.88)                                 | 2.02<10 <sup>-4</sup> | 0.71    | 0.70 | 0       | 1.000              | 0.704  | 1.000      | 0.78(0.63-0.96)       | 0.018                 | 0              | 0.61(0.46-0.83)    | 0.001                  | 30              |                    |  |
| PPARG    | rs1801282 (p.Pro12Ala, c.36C>G)               | 3   | non-synonymous               | All       | G vs C                   | 15.24                     | 4                | 2476/3377      | 1.00(0.88-1.12)                                 | 0.956                 | 0.82    | 0.84 | 0       | 0.734              | 0.887  | 1.000      | 0.93(0.93-1.18)       | 0.542                 | 0              | 1.17(0.80-1.73)    | 0.415                  | 0               |                    |  |
| PPPIR13L | rs6966 (T>A)                                  | 19  | 3'UTR                        | All       | T vs A                   | 46.66                     | 5                | 1120/1361      | 1.09(0.92-1.29)                                 | 0.302                 | 6.96    | 0.14 | 43      | 0.806              | 0.755  | 0.349      | 1.16(0.95-1.43)       | 0.145                 | 0              | 1.11(0.82-1.51)    | 0.502                  | 54              |                    |  |
| PPPIR13L | rs1970764 (IVS1-4364A>G)                      | 19  | intron                       | All       | G vs A                   | 36.71                     | 3                | 678/726        | 1.12(0.90-1.39)                                 | 0.313                 | 3.24    | 0.20 | 38      | 1.000              | 0.918  | 1.000      | 1.12(0.89-1.41)       | 0.349                 | 0              | 1.07(0.54-2.10)    | 0.851                  | 69              |                    |  |
| PROM1    | rs2240688 (A>C)                               | 4   | 3'UTR                        | Asian     | C vs A                   | 27.37                     | 3                | 2332/2457      | 0.83(0.76-0.91)                                 | 6.92<10 <sup>-5</sup> | 0.02    | 0.99 | 0       | 0.296              | 0.379  | 0.281      | 0.80(0.72-0.90)       | 1.65<10 <sup>-4</sup> | 0              | 0.78(0.63-0.97)    | 0.026                  | 0               |                    |  |
| PTGS2    | rs20417 (-765G>C)                             | 1   | intergenic                   | All       | C vs G                   | 16.15                     | 4                | 2355/2731      | 0.96(0.86-1.08)                                 | 0.505                 | 1.84    | 0.61 | 0       | 1.000              | 0.299  | 1.000      | 0.80(0.57-1.13)       | 0.202                 | 42             | 0.87(0.62-1.20)    | 0.391                  | 66              |                    |  |
| PTGS2    | rs689466 (g.38139393T>C, -1195A>G)            | 1   | intergenic                   | All       | G vs A                   | 38.07                     | 4                | 1676/2180      | 0.82(0.65-1.02)                                 | 0.070                 | 13.44   | 0.00 | 78      | 0.734              | 0.218  | 0.626      | 0.78(0.62-0.97)       | 0.026                 | 56             | 0.78(0.62-1.00)    | 0.391                  | 66              |                    |  |
| PTGS2    | rs5275 (c.*427T>C, 8473T>C)                   | 1   | 3'UTR                        | All       | C vs T                   | 29.41                     | 11               | 6813/7988      | 0.95(0.83-1.09)                                 | 0.493                 | 58.16   | 0.00 | 83      | 0.755              | 0.955  | 0.038      | 0.93(0.79-1.10)       | 0.389                 | 74             | 0.90(0.62-1.30)    | 0.578                  | 79              |                    |  |
| RAD23B   | rs1805329 (p.Ala249Val, Ex7+65C>T)            | 9   | non-synonymous               | All       | T vs C                   | 23.29                     | 4                | 653/878        | 1.10(0.80-1.51)                                 | 0.572                 | 3.99    | 0.03 | 68      | 0.089              | 0.059  | 0.231      | 1.10(0.67-1.81)       | 0.703                 | 75             | 1.04(0.52-2.06)    | 0.922                  | 49              |                    |  |
| REVI     | rs3087386 (p.Phe257Ser, 892T>C)               | 2   | non-synonymous               | All       | C vs T                   | 40.81                     | 3                | 1437/1818      | 1.03(0.92-1.14)                                 | 0.658                 | 0.51    | 0.78 | 0       | 1.000              | 0.366  | 1.000      |                       |                       |                |                    |                        |                 |                    |  |
| REV3L    | rs462779 (p.Thr1146Ile, 4259C>T)              | 6   | non-synonymous               | Asian     | T vs C                   | 39.36                     | 4                | 1937/2335      | 1.11(1.02-1.22)                                 | 0.021                 | 0.54    | 0.91 | 0       | 0.734              | 0.921  | 1.000      |                       |                       |                |                    |                        |                 |                    |  |
| REV3L    | rs465464 (460T>C)                             | 6   | 3'UTR                        | All       | C vs T                   | 18.18                     | 4                | 1438/1683      | 0.88(0.73-1.07)                                 | 0.197                 | 5.42    | 0.14 | 45      | 0.308              | 0.058  | 0.429      | 0.78(0.67-0.92)       | 0.003                 | 0              | 0.93(0.62-1.41)    | 0.740                  | 0               |                    |  |
| SFTPB    | wild type/variant (deletions or insertions)   | 2   | intron                       | All       | Var vs wild              | 5.83                      | 3                | 157/240        | 1.92(1.11-3.33)                                 | 0.020                 | 0.08    | 0.96 | 0       | 0.296              | 0.495  | 1.000      | 2.09(1.16-3.76)       | 0.014                 | 0              | 0.32(0.15-0.68)    | 0.003                  | 0               |                    |  |
| SOD2     | rs4880 (rs1799725, Ala16Val)                  | 6   | non-synonymous               | All       | T vs C                   | 51.48                     | 9                | 3738/4467      | 1.20(1.06-1.36)                                 | 0.005                 | 20.34   | 0.01 | 61      | 0.348              | 0.723  | 0.733      | 1.33(1.08-1.64)       | 0.007                 | 52             | 1.17(0.98-1.38)    | 0.082                  | 55              |                    |  |
| SULT1A1  | rs9282861 (p.Arg213His, c.638G>A, *1/*2)      | 16  | non-synonymous               | All       | A vs G                   | 21.68                     | 6                | 1965/2286      | 1.20(0.97-1.48)                                 | 0.094                 | 18.08   | 0.00 | 72      | 1.000              | 0.779  | 1.000      | 1.24(0.94-1.63)       | 0.127                 | 74             | 1.14(0.87-1.50)    | 0.343                  | 0               |                    |  |
| TDG      | rs4135113 (p.Gly19Ser, c.595G>A)              | 12  | non-synonymous               | All       | A vs G                   | 6.13                      | 3                | 289/318        | 0.85(0.51-1.42)                                 | 0.531                 | 1.45    | 0.49 | 0       | 1.000              | 0.497  | 1.000      |                       |                       |                |                    |                        |                 |                    |  |
| TERT     | rs2736098 (p.Ala305Ala, c.915G>A)             | 5   | synonymous                   | All       | A vs G                   | 33.01                     | 7                | 4660/4825      | 1.20(1.08-1.33)                                 | 0.001                 | 17.98   | 0.01 | 67      | 0.548              | 0.734  | 0.706      | 1.23(1.13-1.35)       | 4.84<10 <sup>-6</sup> | 0              | 1.65(1.43-1.89)    | 1.87<10 <sup>-12</sup> | 0               |                    |  |
| TGFB1    | rs1800469 (C-509T)                            | 19  | intergenic                   | Asian     | T vs C                   | 49.31                     | 4                | 1091/1238      | 0.95(0.85-1.07)                                 | 0.428                 | 3.10    | 0.38 | 3       | 0.889              | 0.100  | 1.000      | 0.96(0.72-1.28)       | 0.777                 | 56             | 0.96(0.79-1.17)    | 0.691                  | 0               |                    |  |
| TGFB1    | rs1800470 (-857C>T, -1036C>T)                 | 19  | intergenic                   | All       | C vs T                   | 44.49                     | 7                | 1398/1553      | 1.16(0.97-1.39)                                 | 0.104                 | 15.61   | 0.02 | 62      | 0.764              | 0.718  | 1.000      | 1.00(0.93-1.12)       | 0.079                 | 69</           |                    |                        |                 |                    |  |

| Gene         | Variant                          | Chr | Category       | Ethnicity | Comparison <sup>a</sup> | Frequency(%) <sup>b</sup> | Number evaluated |                | Lung cancer risk meta-analysis in allelic model |         |       |         |                    |        |                         | Dominant model        |                 |         | Recessive model    |                 |         |                    |  |
|--------------|----------------------------------|-----|----------------|-----------|-------------------------|---------------------------|------------------|----------------|-------------------------------------------------|---------|-------|---------|--------------------|--------|-------------------------|-----------------------|-----------------|---------|--------------------|-----------------|---------|--------------------|--|
|              |                                  |     |                |           |                         |                           | Studies          | Cases/Controls | OR(95% CI)                                      | P value | Q     | P for Q | I <sup>2</sup> (%) | Begg P | Modified P <sup>c</sup> | Excess P <sup>d</sup> | OR(95% CI)      | P value | I <sup>2</sup> (%) | OR(95% CI)      | P value | I <sup>2</sup> (%) |  |
| <i>XRCC1</i> | rs3213403 (A>G)                  | 19  | 3'UTR          | All       | G vs A                  | 9.52                      | 3                | 511/751        | 0.98(0.72-1.33)                                 | 0.880   | 2.19  | 0.34    | 9                  | 1.000  | 0.706                   | 1.000                 |                 |         |                    |                 |         |                    |  |
| <i>XRCC1</i> | rs3547 (p.Gln632Gln,c.1896G>A)   | 19  | synonymous     | All       | A vs G                  | 23.31                     | 5                | 881/1201       | 1.00(0.86-1.17)                                 | 0.991   | 1.17  | 0.88    | 0                  | 0.806  | 0.559                   | 1.000                 | 1.03(0.83-1.27) | 0.800   | 0                  | 1.10(0.71-1.70) | 0.671   | 0                  |  |
| <i>XRCC1</i> | rs3213245 (-77T>C)               | 19  | 5'UTR          | All       | C vs T                  | 11.03                     | 5                | 2795/2865      | 1.29(1.04-1.59)                                 | 0.020   | 12.53 | 0.01    | 68                 | 0.806  | 0.539                   | 0.661                 | 1.31(1.04-1.65) | 0.021   | 65                 | 1.58(1.05-2.38) | 0.030   | 0                  |  |
| <i>XRCC2</i> | rs3218536 (p.Arg188His,c.563G>A) | 7   | non-synonymous | Caucasian | A vs G                  | 8.08                      | 3                | 645/1373       | 1.23(0.54-2.77)                                 | 0.625   | 16.79 | 0.00    | 88                 | 1.000  | 0.049                   | 0.317                 | 1.26(0.51-3.11) | 0.618   | 89                 | 1.78(0.58-5.46) | 0.315   | 0                  |  |
| <i>XRCC3</i> | rs1799794 (4541A>G)              | 14  | 5'UTR          | All       | G vs A                  | 41.09                     | 4                | 1389/1941      | 0.91(0.76-1.08)                                 | 0.266   | 7.01  | 0.07    | 57                 | 1.000  | 0.614                   | 0.438                 | 0.92(0.72-1.17) | 0.495   | 58                 | 0.82(0.67-0.99) | 0.038   | 0                  |  |
| <i>XRCC3</i> | rs1799796(17893A>G,IVS5-14)      | 14  | intron         | All       | G vs A                  | 31.99                     | 5                | 1478/3040      | 1.02(0.92-1.12)                                 | 0.756   | 3.45  | 0.49    | 0                  | 0.806  | 0.675                   | 1.000                 | 1.00(0.87-1.16) | 0.956   | 16                 | 1.06(0.85-1.32) | 0.604   | 0                  |  |
| <i>XRCC3</i> | rs861539(p.Thr241Met,c.722C>T)   | 14  | non-synonymous | All       | T vs C                  | 20.93                     | 18               | 6407/8356      | 1.04(0.95-1.13)                                 | 0.414   | 27.73 | 0.05    | 39                 | 0.705  | 0.314                   | 0.142                 | 1.03(0.92-1.16) | 0.600   | 42                 | 1.06(0.90-1.24) | 0.489   | 0                  |  |

Chr=chromosome; OR=odds ratio, 95% CI = 95% confidence interval; ins=insertion; del=deletion; STR=short tandem repeat ; VNTR=variable number of tandem repeats; UTR=untranslated region; CNV=copy number variation.

<sup>a</sup> Allelic contrast or phenotype trait for common variants; genetic comparison for rare variants or variants only with genotype group data

<sup>b</sup> Frequency of minor allele or effect genotype(s) in controls in main meta-analyses

<sup>c</sup> P value for potential small study effect based on the modified Egger's test

<sup>d</sup> P value for possible existing an excess of significant findings (the number of observed significant studies more than the number of expected significant studies) based on the excess significance test

**Supplementary Table S2. Credibility assessment for variants with significant associations with lung cancer risk in meta-analyses for all available data** (Continued on next page)

| Genes                                                                                             | Variants                 | Alleles <sup>a</sup> | Ethnicity | Number evaluated | Lung-cancer risk meta-analysis |                          |                 |                        | Venice criteria grades <sup>d</sup> | Credibility of evidence <sup>e</sup> | Amount of evidence <sup>f</sup>    |          | Protection from bias <sup>h</sup> |       | Sensitivity analysis <sup>g</sup> |                           | Low OR <sup>i</sup> | Modified <i>P</i> <sup>k</sup> | Excess <i>P</i> <sup>l</sup> | Begg <i>P</i> <sup>m</sup> |                         |                |
|---------------------------------------------------------------------------------------------------|--------------------------|----------------------|-----------|------------------|--------------------------------|--------------------------|-----------------|------------------------|-------------------------------------|--------------------------------------|------------------------------------|----------|-----------------------------------|-------|-----------------------------------|---------------------------|---------------------|--------------------------------|------------------------------|----------------------------|-------------------------|----------------|
|                                                                                                   |                          |                      |           |                  | Genetic models                 | OR(95%CI) <sup>b</sup>   | <i>P</i> value  | <i>F</i> (%)           |                                     |                                      | <i>P</i> <sub>0</sub> <sup>c</sup> | Numbers  | Grade                             | Grade | Reasons for bias                  | Reason for bias exemption |                     |                                |                              |                            | Initial study influence |                |
|                                                                                                   |                          |                      |           |                  |                                |                          |                 |                        |                                     |                                      |                                    |          |                                   |       |                                   |                           |                     |                                |                              |                            | OR(95%CI)               | <i>P</i> value |
| <b>Associations identified by analysis of all available data in main meta-analysis</b>            |                          |                      |           |                  |                                |                          |                 |                        |                                     |                                      |                                    |          |                                   |       |                                   |                           |                     |                                |                              |                            |                         |                |
| <i>AGER</i>                                                                                       | rs1800624                | A/T                  | Asian     | 3                | 1656/1693                      | Allelic                  | 1.18(1.04-1.33) | 0.010                  | 16                                  | 0.305                                | AAA                                | Weak     | 2292                              | A     | A                                 |                           |                     |                                |                              |                            |                         |                |
| <i>APEX1</i>                                                                                      | rs1760944                | A/C                  | All       | 8                | 3588/3783                      | Allelic                  | 1.16(1.08-1.25) | 2.85×10 <sup>-5</sup>  | 9                                   | 0.360                                | AAA                                | Strong   | 7338                              | A     | A                                 |                           |                     |                                |                              |                            |                         |                |
| <i>ATM</i>                                                                                        | rs189037                 | A/G                  | Asian     | 5                | 3036/3415                      | Allelic                  | 1.09(1.00-1.18) | 0.050                  | 29                                  | 0.227                                | ABC                                | Moderate | 5653                              | A     | B                                 |                           |                     |                                |                              |                            |                         |                |
| <i>AXIN2</i>                                                                                      | rs2240308                | T/C                  | All       | 3                | 758/742                        | Allelic                  | 0.73(0.63-0.85) | 6.39×10 <sup>-5</sup>  | 0                                   | 0.398                                | AAA                                | Strong   | 1015                              | A     | A                                 |                           |                     |                                |                              |                            |                         |                |
| <i>BCL2</i>                                                                                       | rs2279115                | A/C                  | All       | 5                | 1847/2367                      | Allelic                  | 0.65(0.46-0.91) | 0.011                  | 91                                  | 0.000                                | ACC                                | Weak     | 3448                              | A     | C                                 |                           |                     |                                |                              |                            |                         |                |
| <i>CD3EAP</i>                                                                                     | rs967591                 | A/G                  | All       | 3                | 676/726                        | Allelic                  | 1.23(1.01-1.49) | 0.036                  | 22                                  | 0.278                                | BAA                                | Moderate | 956                               | B     | A                                 |                           |                     |                                |                              |                            |                         |                |
| <i>CHRNA3</i>                                                                                     | rs578776                 | T/C                  | All       | 3                | 1245/2009                      | Allelic                  | 0.87(0.77-0.98) | 0.018                  | 0                                   | 0.908                                | ACC                                | Weak     | 2089                              | A     | A                                 |                           |                     |                                |                              |                            |                         |                |
| <i>CHRNA3</i>                                                                                     | rs938682                 | C/T                  | All       | 3                | 1240/1986                      | Allelic                  | 0.86(0.76-0.96) | 0.009                  | 0                                   | 0.582                                | ACC                                | Weak     | 1836                              | A     | A                                 |                           |                     |                                |                              |                            |                         |                |
| <i>CHRNA3</i>                                                                                     | rs12914385               | T/C                  | All       | 4                | 4356/2873                      | Allelic                  | 1.20(1.01-1.44) | 0.044                  | 76                                  | 0.007                                | ACA                                | Weak     | 6567                              | A     | C                                 |                           |                     |                                |                              |                            |                         |                |
| <i>CHRNA3</i>                                                                                     | rs6495309                | T/C                  | All       | 4                | 3381/4244                      | Allelic                  | 0.83(0.77-0.89) | 6.55×10 <sup>-8</sup>  | 0                                   | 0.427                                | AAA                                | Strong   | 5804                              | A     | A                                 |                           |                     |                                |                              |                            |                         |                |
| <i>CHRNA5</i>                                                                                     | rs16969968               | A/G                  | All       | 11               | 6222/62452                     | Allelic                  | 1.23(1.06-1.43) | 0.007                  | 80                                  | 0.000                                | ACC                                | Weak     | 43607                             | A     | C                                 |                           |                     |                                |                              |                            |                         |                |
| <i>CLPTMIL</i>                                                                                    | rs402710                 | T/C                  | All       | 13               | 7214/8051                      | Allelic                  | 0.89(0.83-0.95) | 2.63×10 <sup>-4</sup>  | 38                                  | 0.078                                | ABC                                | Weak     | 9708                              | A     | B                                 |                           |                     |                                |                              |                            |                         |                |
| <i>CXCR2</i>                                                                                      | rs1126579                | T/C                  | All       | 3                | 942/964                        | Allelic                  | 0.84(0.74-0.96) | 0.009                  | 0                                   | 0.967                                | AAA                                | Strong   | 2037                              | A     | A                                 |                           |                     |                                |                              |                            |                         |                |
| <i>CYP11A1</i>                                                                                    | rs4646903                | C/T                  | All       | 56               | 9789/12307                     | Allelic                  | 1.16(1.07-1.25) | 1.59×10 <sup>-4</sup>  | 55                                  | 0.000                                | ACC                                | Weak     | 9955                              | A     | C                                 |                           |                     |                                |                              |                            |                         |                |
| <i>CYP11A1</i>                                                                                    | rs1048943                | G/A                  | All       | 54               | 9869/12114                     | Allelic                  | 1.23(1.11-1.36) | 7.64×10 <sup>-5</sup>  | 67                                  | 0.000                                | ACC                                | Weak     | 8169                              | A     | C                                 |                           |                     |                                |                              |                            |                         |                |
| <i>CYP11B1</i>                                                                                    | rs1056836                | G/C                  | All       | 12               | 3033/3866                      | Allelic                  | 1.13(1.05-1.22) | 0.002                  | 0                                   | 0.551                                | AAC                                | Weak     | 5372                              | A     | C                                 |                           |                     |                                |                              |                            |                         |                |
| <i>CYP2A6</i>                                                                                     | rs5031016                | C/T                  | All       | 3                | 1527/1138                      | Allelic                  | 0.57(0.33-1.00) | 0.048                  | 73                                  | 0.025                                | BCC                                | Weak     | 465                               | B     | C                                 |                           |                     |                                |                              |                            |                         |                |
| <i>CYP2A6</i>                                                                                     | rs1801272                | A/T                  | Caucasian | 3                | 2411/2644                      | carriers vs non-carriers | 0.66(0.52-0.84) | 0.001                  | 0                                   | 0.674                                | BAB                                | Moderate | 307                               | B     | A                                 |                           |                     |                                |                              |                            |                         |                |
| <i>CYP2E1</i>                                                                                     | rs6413432                | A/T(C/D)             | All       | 14               | 2944/3347                      | Allelic                  | 0.78(0.71-0.85) | 6.76×10 <sup>-8</sup>  | 0                                   | 0.821                                | AAA                                | Strong   | 2561                              | A     | A                                 |                           |                     |                                |                              |                            |                         |                |
| <i>CYP2E1</i>                                                                                     | rs2031920                | T/C(c2/c1)           | All       | 23               | 4983/6628                      | Allelic                  | 0.86(0.76-0.97) | 0.018                  | 50                                  | 0.003                                | ACA                                | Weak     | 4010                              | A     | C                                 |                           |                     |                                |                              |                            |                         |                |
| <i>ELANE</i>                                                                                      | rs351107                 | G/T                  | Caucasian | 3                | 745/762                        | Allelic                  | 0.55(0.34-0.87) | 0.011                  | 29                                  | 0.246                                | BBC                                | Weak     | 126                               | B     | C                                 |                           |                     |                                |                              |                            |                         |                |
| <i>ELANE</i>                                                                                      | rs7254054                | A/G                  | Caucasian | 3                | 754/750                        | Allelic                  | 0.77(0.61-0.97) | 0.030                  | 46                                  | 0.155                                | BBC                                | Weak     | 735                               | B     | B                                 |                           |                     |                                |                              |                            |                         |                |
| <i>ERCC1</i>                                                                                      | rs11615                  | C/T                  | All       | 12               | 5731/7058                      | Allelic                  | 0.90(0.83-0.99) | 0.023                  | 52                                  | 0.018                                | ACC                                | Weak     | 13244                             | A     | C                                 |                           |                     |                                |                              |                            |                         |                |
| <i>ERCC2</i>                                                                                      | rs238406                 | A/C                  | All       | 6                | 1754/2688                      | Allelic                  | 1.12(1.02-1.23) | 0.013                  | 0                                   | 0.558                                | AAC                                | Weak     | 3611                              | A     | C                                 |                           |                     |                                |                              |                            |                         |                |
| <i>ERCC2</i>                                                                                      | rs13181                  | C/A                  | All       | 40               | 13111/16749                    | Allelic                  | 1.12(1.05-1.19) | 4.18×10 <sup>-4</sup>  | 49                                  | 0.000                                | ABC                                | Weak     | 14855                             | A     | B                                 |                           |                     |                                |                              |                            |                         |                |
| <i>ERCC5</i>                                                                                      | rs1047768                | T/C                  | All       | 4                | 1449/2248                      | Allelic                  | 0.86(0.74-1.00) | 0.049                  | 48                                  | 0.123                                | ABC                                | Weak     | 3204                              | A     | B                                 |                           |                     |                                |                              |                            |                         |                |
| <i>ERCC6</i>                                                                                      | rs3793784                | G/C                  | All       | 3                | 1643/1689                      | Allelic                  | 0.75(0.60-0.92) | 0.007                  | 68                                  | 0.044                                | ACA                                | Weak     | 1834                              | A     | C                                 |                           |                     |                                |                              |                            |                         |                |
| <i>FGFR4</i>                                                                                      | rs351855                 | A/G                  | All       | 4                | 1083/1275                      | Allelic                  | 0.82(0.69-0.98) | 0.025                  | 33                                  | 0.214                                | ABC                                | Weak     | 1892                              | A     | B                                 |                           |                     |                                |                              |                            |                         |                |
| <i>GSTM1</i>                                                                                      | Present/Null             | NA                   | All       | 131              | 32985/37533                    | null vs present          | 1.18(1.12-1.24) | 2.54×10 <sup>-11</sup> | 52                                  | 0.000                                | ACC                                | Weak     | 35699                             | A     | C                                 |                           |                     |                                |                              |                            |                         |                |
| <i>GSTP1</i>                                                                                      | rs1695                   | G/A                  | All       | 46               | 12521/14411                    | Allelic                  | 1.08(1.02-1.15) | 0.011                  | 55                                  | 0.000                                | ACC                                | Weak     | 16519                             | A     | C                                 |                           |                     |                                |                              |                            |                         |                |
| <i>GSTT1</i>                                                                                      | Present/Null             | NA                   | All       | 76               | 22796/25134                    | null vs present          | 1.10(1.02-1.19) | 0.015                  | 58                                  | 0.000                                | ACC                                | Weak     | 13531                             | A     | C                                 |                           |                     |                                |                              |                            |                         |                |
| <i>HIF1A</i>                                                                                      | rs11549667               | A/G                  | All       | 3                | 509/566                        | Allelic                  | 2.27(1.74-2.96) | 1.62×10 <sup>-9</sup>  | 0                                   | 0.481                                | BAA                                | Moderate | 297                               | B     | A                                 |                           |                     |                                |                              |                            |                         |                |
| <i>HRAS1</i>                                                                                      | common/rare (HRAS1 VNTR) | NA                   | Caucasian | 4                | 746/1174                       | rare vs common           | 2.55(1.01-6.45) | 0.048                  | 69                                  | 0.023                                | BCC                                | Weak     | 305                               | B     | C                                 |                           |                     |                                |                              |                            |                         |                |
| <i>HYKK</i>                                                                                       | rs931794                 | G/A                  | All       | 5                | 2435/3180                      | Allelic                  | 1.23(1.14-1.34) | 1.85×10 <sup>-7</sup>  | 0                                   | 0.864                                | AAA                                | Strong   | 3927                              | A     | A                                 |                           |                     |                                |                              |                            |                         |                |
| <i>IL10</i>                                                                                       | rs1800896                | G/A                  | All       | 10               | 2861/3817                      | Allelic                  | 1.29(1.05-1.59) | 0.017                  | 75                                  | 0.000                                | ACC                                | Weak     | 5175                              | A     | C                                 |                           |                     |                                |                              |                            |                         |                |
| <i>MAPKAPK2</i>                                                                                   | CNV-30450                | NA                   | Asian     | 3                | 2332/2480                      | 4 copies vs 2 copies     | 1.60(1.04-2.45) | 0.031                  | 81                                  | 0.005                                | BCC                                | Weak     | 586                               | B     | C                                 |                           |                     |                                |                              |                            |                         |                |
| <i>MDM2</i>                                                                                       | rs2279744                | G/T                  | All       | 19               | 11076/14434                    | Allelic                  | 1.10(1.01-1.19) | 0.021                  | 75                                  | 0.000                                | ACC                                | Weak     | 21593                             | A     | C                                 |                           |                     |                                |                              |                            |                         |                |
| <i>MIR146A</i>                                                                                    | rs2910164                | C/G                  | All       | 6                | 3158/3225                      | Allelic                  | 1.16(1.06-1.27) | 0.001                  | 21                                  | 0.274                                | AAC                                | Weak     | 5983                              | A     | C                                 |                           |                     |                                |                              |                            |                         |                |
| <i>MMP2</i>                                                                                       | rs243865                 | T/C                  | All       | 3                | 1751/1729                      | Allelic                  | 0.63(0.45-0.89) | 0.009                  | 80                                  | 0.007                                | BCC                                | Weak     | 954                               | B     | C                                 |                           |                     |                                |                              |                            |                         |                |
| <i>MTRR</i>                                                                                       | rs1801394                | G/A                  | All       | 3                | 1668/2291                      | Allelic                  | 1.13(1.02-1.24) | 0.011                  | 0                                   | 0.525                                | AAC                                | Weak     | 3616                              | A     | A                                 |                           |                     |                                |                              |                            |                         |                |
| <i>NOD2</i>                                                                                       | rs2066847                | 3020insC/-           | All       | 3                | 807/4078                       | carriers vs non-carriers | 1.42(1.07-1.90) | 0.017                  | 0                                   | 0.593                                | ×ACC                               | Weak     | 340                               | ×     | A                                 |                           |                     |                                |                              |                            |                         |                |
| <i>PDCD5</i>                                                                                      | rs1862214                | G/C                  | All       | 3                | 737/683                        | Allelic                  | 1.32(1.12-1.56) | 0.001                  | 0                                   | 0.395                                | BAB                                | Moderate | 971                               | B     | A                                 |                           |                     |                                |                              |                            |                         |                |
| <i>PON1</i>                                                                                       | rs662                    | A/G                  | All       | 3                | 995/834                        | Allelic                  | 0.77(0.67-0.88) | 2.02×10 <sup>-4</sup>  | 0                                   | 0.701                                | AAA                                | Strong   | 1569                              | A     | A                                 |                           |                     |                                |                              |                            |                         |                |
| <i>PROM1</i>                                                                                      | rs2240688                | C/A                  | Asian     | 3                | 2332/2457                      | Allelic                  | 0.83(0.76-0.91) | 6.92×10 <sup>-5</sup>  | 0                                   | 0.991                                | AAB                                | Moderate | 2459                              | A     | A                                 |                           |                     |                                |                              |                            |                         |                |
| <i>REV3L</i>                                                                                      | rs462779                 | T/C                  | Asian     | 4                | 1937/2335                      | Allelic                  | 1.11(1.02-1.22) | 0.021                  | 0                                   | 0.911                                | AAC                                | Strong   | 3433                              | A     | A                                 |                           |                     |                                |                              |                            |                         |                |
| <i>SFTPB</i>                                                                                      | wild type/variation      | NA                   | All       | 3                | 157/240                        | variation vs wild        | 1.92(1.11-3.33) | 0.020                  | 0                                   | 0.960                                | CAB                                | Weak     | 59                                | C     | A                                 |                           |                     |                                |                              |                            |                         |                |
| <i>SOD2</i>                                                                                       | rs4880                   | T/C                  | All       | 9                | 3738/4467                      | Allelic                  | 1.20(1.06-1.36) | 0.005                  | 61                                  | 0.009                                | ACA                                | Weak     | 8801                              | A     | C                                 |                           |                     |                                |                              |                            |                         |                |
| <i>TERT</i>                                                                                       | rs2736098                | A/G                  | All       | 7                | 4660/4825                      | Allelic                  | 1.20(1.08-1.33) | 0.001                  | 67                                  | 0.006                                | ACB                                | Weak     | 6619                              | A     | C                                 |                           |                     |                                |                              |                            |                         |                |
| <i>TP53</i>                                                                                       | rs12951053               | G/T                  | All       | 3                | 475/569                        | Allelic                  | 1.57(1.11-2.23) | 0.011                  | 37                                  | 0.203                                | BBB                                | Moderate | 258                               | B     | B                                 |                           |                     |                                |                              |                            |                         |                |
| <i>TP63</i>                                                                                       | rs10937405               | T/C                  | All       | 4                | 4927/8794                      | Allelic                  | 0.87(0.81-0.94) | 2.20×10 <sup>-4</sup>  | 34                                  | 0.207                                | ABA                                | Moderate | 11355                             | A     | B                                 |                           |                     |                                |                              |                            |                         |                |
| <i>UGT1A6</i>                                                                                     | rs6759892                | G/T                  | All       | 3                | 266/261                        | Allelic                  | 2.27(1.44-4.53) | 0.020                  | 84                                  | 0.002                                | BCA                                | Weak     | 346                               | B     | C                                 |                           |                     |                                |                              |                            |                         |                |
| <i>WWOX</i>                                                                                       | CNV-67048                | NA                   | Asian     | 4                | 2062/3074                      | 0 copy vs 2 copies       | 2.06(1.58-2.70) | 1.20×10 <sup>-7</sup>  | 0                                   | 0.911                                | BAB                                | Moderate | 247                               | B     | A                                 |                           |                     |                                |                              |                            |                         |                |
| <i>XRCC1</i>                                                                                      | rs3213255                | G/A                  | All       | 3                | 1089/1506                      | Allelic                  | 1.21(1.08-1.35) | 0.001                  | 0                                   | 0.457                                | AAB                                | Moderate | 2110                              | A     | A                                 |                           |                     |                                |                              |                            |                         |                |
| <i>XRCC1</i>                                                                                      | rs1001581                | T/C                  | All       | 5                | 851/1166                       | Allelic                  | 1.17(1.00-1.37) | 0.044                  | 28                                  | 0.232                                | ABC                                | Weak     | 1467                              | A     | B                                 |                           |                     |                                |                              |                            |                         |                |
| <i>XRCC1</i>                                                                                      | rs1799782                | T/C                  | All       | 30               | 11096/13772                    | Allelic                  | 0.90(0.82-0.98) | 0.022                  | 62                                  | 0.000                                | ACC                                | Weak     | 9151                              | A     | C                                 |                           |                     |                                |                              |                            |                         |                |
| <i>XRCC1</i>                                                                                      | rs3213245                | C/T                  | All       | 5                | 2795/2865                      | Allelic                  | 1.29(1.04-1.59) | 0.020                  | 68                                  | 0.014                                | ACC                                | Weak     | 1413                              | A     | C                                 |                           |                     |                                |                              |                            |                         |                |
| <b>Associations identified from additional analyses under dominant or recessive genetic model</b> |                          |                      |           |                  |                                |                          |                 |                        |                                     |                                      |                                    |          |                                   |       |                                   |                           |                     |                                |                              |                            |                         |                |
| <i>ATM</i>                                                                                        | rs664677                 | C/T                  | All       | 3                | 1627/1641                      | Dominant                 | 0.76(0.64-0.92) | 0.004                  | 0                                   | 0.448                                | AAA                                | Strong   | 2692                              | A     | A                                 |                           |                     |                                |                              |                            |                         |                |
| <i>Chr8q24</i>                                                                                    | rs16901979               | A/C                  | All       | 3                | 1534/1992                      | Dominant                 | 1.18(1.02-1.37) | 0.025                  | 0                                   | 0.610                                | AAC                                | Weak     | 1306                              | A     | C                                 |                           |                     |                                |                              |                            |                         |                |
| <i>CYP11B1</i>                                                                                    | rs10012                  | G/C                  | All       | 3                | 622/666                        | Dominant                 | 1.69(1.05-2.72) | 0.031                  | 74                                  | 0.021                                | BCC                                | Weak     | 657                               | B     | C                                 |                           |                     |                                |                              |                            |                         |                |
| <i>EGF</i>                                                                                        | rs4444903                | G/A                  | All       | 3                | 666/690                        | Dominant                 | 2.07(1.01-4.24) | 0.048                  | 79                                  | 0.009                                | ACC                                | Weak     | 1141                              | A     | C                                 |                           |                     |                                |                              |                            |                         |                |
| <i>MLH1</i>                                                                                       | rs1800734                | A/G                  | All       | 5                | 2178/2320                      | Dominant                 | 0.80(0.68-0.95) | 0.009                  | 24                                  | 0.260                                | AAC                                | Weak     | 3344                              | A     | C                                 |                           |                     |                                |                              |                            |                         |                |
| <i>PTGS2</i>                                                                                      | rs689466                 | G/A                  | All       | 4                | 1676/2180                      | Dominant                 | 0.78(0.62-0.97) | 0.026                  | 56                                  | 0.076                                | ACA                                | Weak     | 2198                              | A     | C                                 |                           |                     |                                |                              |                            |                         |                |

|              |           |     |     |    |             |           |                 |       |    |       |     |          |      |   |   |   |                                   |                 |        |     |    |       |       |       |
|--------------|-----------|-----|-----|----|-------------|-----------|-----------------|-------|----|-------|-----|----------|------|---|---|---|-----------------------------------|-----------------|--------|-----|----|-------|-------|-------|
| <i>IL17A</i> | rs2275913 | A/G | All | 3  | 889/998     | Recessive | 1.76(1.21-2.55) | 0.003 | 18 | 0.295 | BAB | Moderate | 179  | B | A | B | Missing information               | 2.00(1.41-2.83) | <0.001 | NA  | No | 0.492 | 0.587 | 0.296 |
| <i>IL1B</i>  | rs1143627 | C/T | All | 8  | 4201/5431   | Recessive | 0.80(0.68-0.95) | 0.010 | 49 | 0.059 | ABC | Weak     | 1588 | A | B | C | Small study,publication bias      | 0.83(0.70-0.98) | 0.027  | No  | No | 0.002 | 0.404 | 0.019 |
| <i>LIG1</i>  | rs156641  | A/G | All | 3  | 1112/2048   | Recessive | 1.45(1.14-1.83) | 0.002 | 0  | 0.370 | BAC | Weak     | 335  | B | A | C | HWE                               | NA              |        | Yes | No | 0.217 | 1.000 | 1.000 |
| <i>XPA</i>   | rs1800975 | A/G | All | 12 | 4221/5240   | Recessive | 1.22(1.05-1.42) | 0.011 | 33 | 0.124 | ABA | Moderate | 1463 | A | B | A |                                   | 1.23(1.04-1.45) | 0.015  | No  | No | 0.524 | 0.397 | 0.681 |
| <i>XRCC1</i> | rs25487   | A/G | All | 48 | 16999/20567 | Recessive | 1.16(1.03-1.30) | 0.018 | 54 | 0.000 | ACC | Weak     | 3691 | A | C | C | HWE.excess of significant studies | 1.15(1.02-1.30) | 0.022  | Yes | No | 0.428 | 0.006 | 0.729 |
| <i>XRCC3</i> | rs1799794 | G/A | All | 4  | 1389/1941   | Recessive | 0.82(0.67-0.99) | 0.038 | 0  | 0.469 | BAC | Weak     | 571  | B | A | C | First study                       | 0.83(0.68-1.01) | 0.058  | No  | No | 0.712 | 0.490 | 1.000 |

Chr=chromosome; OR=odds ratio, 95% CI = 95% confidence interval; VNTR=variable number of tandem repeats; ins=insertion, del=deletion; NA=Not Applicable.

<sup>a</sup>Minor alleles/major alleles (per Caucasian)

<sup>b</sup>Summary ORs were calculated based on the DerSimonian-Lairs random-effects model

<sup>c</sup>P-value of heterogeneity test between studies

<sup>d</sup>Venice criteria grades contained assessments of three aspects: the amount of evidence, extent of replication, and protection from bias, and each assessment was assigned three levels (A, B, or C).

<sup>e</sup>Credibility of evidence was evaluated based on Venice criteria with three aspects (the amount of evidence, extent of replication, and protection from bias), and was categorized as strong (all three aspect grades were A), moderate (any grade was B, but not C) or weak (any grade was C).

<sup>f</sup>Amount of evidence, depending on total sample size of the smallest genetic group among cases and controls in each meta-analysis, was graded as A (sample size>1000), B (sample size between 100 and 1000), or C (sample size <100). One rare variant was not scored for amount of evidence (x), for this variant with frequency less than 0.5% and an A grade was unlikely to obtain.

<sup>g</sup>Extent of replication, depending on between-study heterogeneity, was graded as A ( $I^2<25\%$ ), B ( $I^2$  between 25% and 50%), or C ( $I^2>50\%$ ).

<sup>h</sup>Protection from bias, considering various potential sources of bias in meta-analysis, was graded as A when there was no demonstrable bias and bias was unlikely invalidate the association, was graded as B when there was insufficient information for identifying evidence (i.e. missing information for evaluating Hardy-Weinberg equilibrium (HWE) among controls in an individual study) although there was no obvious bias, and C when the bias was evident and/or was likely to explain the presence of association. For the C grade, it was assigned if a meta-analysis had any of the following potential sources of bias: (1) magnitude of the association was low; (2) sensitivity analysis altered the statistical significance; (3) potential small study effect; (4) possible existence of an excess of significant findings (the number of observed significant studies more than the number of expected significant studies); (5) potential publication bias.

First study=Significance lost excluding the first published or first positive report; Low OR=Low magnitude of the association (i.e. 0.87<OR<1.15); Small study=Possible existence of potential small study effect (modified Egger's test,  $p<0.10$ ); Excess of significant studies=Possible existence of an excess of significant findings (excess significance test,  $p<0.10$ ); Publication bias= Possible existence of potential publication bias (Begg's test,  $p<0.10$ ); Missing information= Insufficient information for bias evaluation; HWE=Significance lost excluding studies with controls violating HWE; Highly consistent OR=A meta-analysis with a low OR was not considered if there is a highly consistent OR across studies enrolled in this meta-analysis.

<sup>i</sup>A sensitivity analysis was performed to examine whether the significant summary ORs were robust after excluding the first published or first positive report (defined as the earliest study reported a significant association), or excluding studies with controls violating HWE. None=A meta-analysis didn't include studies with controls violating HWE or evaluated association for a variant with a phenotype change; NO=Without the influence from studies with controls violating HWE; NA=Insufficient information for evaluation of influence from first published/positive study or studies with controls violating HWE; Yes=Evidence of influence from studies with controls violating HWE.

<sup>j</sup>Low OR (i.e. 0.87<OR<1.15; No=Association without a low OR; Yes=Association with a low OR.)

<sup>k</sup>P value for potential small study effect based on the modified Egger's test. ( $P<0.10$  is usually considered evidence for significant evidence of small study effect.)

<sup>l</sup>P value for possible existing an excess of significant findings based on the excess significance test. ( $P<0.10$  is usually considered evidence for significant evidence of an excess of significant findings.)

<sup>m</sup>P value for potential publication bias of studies based on the Begg's test. ( $P<0.10$  is usually considered evidence for significant evidence of publication bias.)

Supplementary Table S3. Subgroup meta-analyses stratified by ethnicity for genetic variants with available data (Continued on next three pages)

| Gene    | Variant                                        | Alleles <sup>a</sup> | Meta-analysis performed in Caucasian population |                |                           |                |                 | Meta-analysis performed in Asian population |                    |           |                |                           |                 |                       |                       |                    |
|---------|------------------------------------------------|----------------------|-------------------------------------------------|----------------|---------------------------|----------------|-----------------|---------------------------------------------|--------------------|-----------|----------------|---------------------------|-----------------|-----------------------|-----------------------|--------------------|
|         |                                                |                      | Studies                                         | Cases/Controls | Frequency(%) <sup>b</sup> | Genetic models | OR (95% CI)     | P value                                     | I <sup>2</sup> (%) | Studies   | Cases/Controls | Frequency(%) <sup>b</sup> | Genetic models  | OR (95% CI)           | P value               | I <sup>2</sup> (%) |
| ABCB1   | rs1045642(p.Ile1145Ile,c.3435T>C)              | T/C                  |                                                 |                |                           |                |                 |                                             |                    |           |                |                           |                 |                       |                       |                    |
| ACE     | 287-bp repeat                                  | 287-bp ins/-         |                                                 |                |                           |                |                 |                                             |                    |           |                |                           |                 |                       |                       |                    |
| AGER    | rs1800624(-374T>A, Mun1)                       | A/T                  |                                                 |                |                           |                |                 |                                             |                    |           |                |                           |                 |                       |                       |                    |
| AGER    | rs1800625(-429T>C, Alu1)                       | C/T                  |                                                 |                |                           |                |                 |                                             | 3                  | 1656/1693 | 34.41          | Allelic                   | 1.18(1.04-1.33) | 0.010                 | 16                    |                    |
| AGER    | rs2070600(p.Gly82Ser,c.244G>A)                 | A/G                  |                                                 |                |                           |                |                 |                                             | 3                  | 1656/1693 | 31.19          | Allelic                   | 1.16(0.78-1.74) | 0.468                 | 91                    |                    |
| AHR     | rs2066853(Arg554Lys,Ex10+501G>A)               | A/G                  |                                                 |                |                           |                |                 |                                             | 3                  | 1656/1693 | 38.36          | Allelic                   | 1.17(0.99-1.38) | 0.067                 | 52                    |                    |
| ALDH2   | rs671(p.Glu487Lys/Glu504Lys,c.1510G>A)         | A/G                  |                                                 |                |                           |                |                 |                                             | 3                  | 1382/1381 | 37.33          | Allelic                   | 0.99(0.86-1.14) | 0.901                 | 38                    |                    |
| APEX1   | rs1760944(c.-468T>G,-141T>G)                   | A/C                  |                                                 |                |                           |                |                 |                                             | 3                  | 1610/2059 | NA             | Dominant                  | 0.88(0.61-1.26) | 0.476                 | 83                    |                    |
| APEX1   | rs1048945(p.Gln51His,c.153G>C)                 | C/G                  |                                                 | 745/816        | 4.72                      | Allelic        | 0.93(0.67-1.31) | 0.684                                       | 0                  | 5         | 3071/3038      | 49.95                     | Allelic         | 1.20(1.12-1.29)       | 9.14x10 <sup>-7</sup> | 0                  |
| APEX1   | rs1130409(p.Asp148Glu,c.444T>G)                | G/T                  | 3                                               | 1807/3065      | 47.91                     | Allelic        | 0.94(0.85-1.04) | 0.249                                       | 19                 | 10        | 4220/5054      | 39.20                     | Allelic         | 1.02(0.92-1.12)       | 0.729                 | 58                 |
| APEX1   | rs2307486(p.Ile64Val,c.190A>G)                 | G/A                  |                                                 |                |                           |                |                 |                                             | 3                  | 1941/2095 | 4.89           | Allelic                   | 0.90(0.73-1.11) | 0.307                 | 0                     |                    |
| ATM     | rs609429(IVS48+238C>G)                         | G/C                  |                                                 |                |                           |                |                 |                                             |                    |           |                |                           |                 |                       |                       |                    |
| ATM     | rs664677(IVS21T-77C)                           | C/T                  |                                                 |                |                           |                |                 |                                             |                    |           |                |                           |                 |                       |                       |                    |
| ATM     | rs189037(c.-111G>A,-4519G>A)                   | A/G                  |                                                 |                |                           |                |                 |                                             | 5                  | 3036/3415 | 42.68          | Allelic                   | 1.09(1.00-1.18) | 0.050                 | 29                    |                    |
| ATM     | rs664143(IVS34G+60A)                           | G/A                  |                                                 |                |                           |                |                 |                                             |                    |           |                |                           |                 |                       |                       |                    |
| AURKA   | rs2273535(p.Phe31Ile,c.91T>A)                  | A/T                  | 3                                               | 2301/2069      | 48.28                     | Allelic        | 0.96(0.86-1.06) | 0.421                                       | 0                  |           |                |                           |                 |                       |                       |                    |
| AURKA   | rs1047972(p.Ile57Val,c.169A>G)                 | A/G                  | 3                                               | 2463/2283      | 15.75                     | Allelic        | 0.96(0.86-1.07) | 0.425                                       | 0                  |           |                |                           |                 |                       |                       |                    |
| AXIN2   | rs2240308(p.Pro50Ser,c.148C>T)                 | T/C                  |                                                 |                |                           |                |                 |                                             |                    |           |                |                           |                 |                       |                       |                    |
| BCL2    | rs2279115(c.-938C>A)                           | A/C                  |                                                 |                |                           |                |                 |                                             | 3                  | 1537/2057 | 41.15          | Allelic                   | 0.76(0.51-1.13) | 0.170                 | 93                    |                    |
| BIRC5   | rs9904341(c.-31G>C)                            | C/G                  |                                                 |                |                           |                |                 |                                             |                    |           |                |                           |                 |                       |                       |                    |
| BRCA2   | rs144848(p.Asn372His,c.1114A>C)                | C/A                  |                                                 |                |                           |                |                 |                                             |                    |           |                |                           |                 |                       |                       |                    |
| CASC8   | rs1447295(C>A)                                 | A/C                  |                                                 |                |                           |                |                 |                                             |                    |           |                |                           |                 |                       |                       |                    |
| CASC8   | rs6983267(T>G)                                 | G/T                  |                                                 |                |                           |                |                 |                                             |                    |           |                |                           |                 |                       |                       |                    |
| CASP5   | rs523104(p.Leu318Val,c.748C>G)                 | C/G                  |                                                 |                |                           |                |                 |                                             |                    |           |                |                           |                 |                       |                       |                    |
| CASP8   | rs3834129(-652 6N del,-CTTACT)                 | -CTTACT              |                                                 |                |                           |                |                 |                                             |                    |           |                |                           |                 |                       |                       |                    |
| CASP8   | rs1045485(p.Asp302His,c.853G>C)                | C/G                  | 3                                               | 758/964        | 10.79                     | Allelic        | 1.27(0.94-1.73) | 0.125                                       | 45                 | 3         | 2301/2263      | 23.84                     | Allelic         | 0.88(0.72-1.07)       | 0.207                 | 73                 |
| CCND1   | rs678653(G>C)                                  | C/G                  |                                                 |                |                           |                |                 |                                             |                    |           |                |                           |                 |                       |                       |                    |
| CCND1   | rs9344(rs603965,p.Pro241Pro,c.723G>A)          | A/G                  | 6                                               | 10204/11646    | 48.88                     | Allelic        | 0.97(0.88-1.07) | 0.517                                       | 62                 |           |                |                           |                 |                       |                       |                    |
| CD3EAP  | rs967591(c.-21G>A)                             | A/G                  |                                                 |                |                           |                |                 |                                             |                    |           |                |                           |                 |                       |                       |                    |
| CDKN1A  | rs1801270(p.Ser31Arg,c.93C>A,6829C>A)          | A/C                  | 7                                               | 3335/4082      | 7.06                      | Allelic        | 1.12(0.89-1.41) | 0.340                                       | 62                 |           |                |                           |                 |                       |                       |                    |
| CDKN2A  | rs3731249(p.Ala148Thr,c.442G>A)                | A/G                  | 3                                               | 2875/2707      | 1.75                      | Dominant       | 1.38(0.81-2.35) | 0.230                                       | 56                 |           |                |                           |                 |                       |                       |                    |
| Chr8q24 | rs16901979(C>A)                                | A/C                  |                                                 |                |                           |                |                 |                                             |                    |           |                |                           |                 |                       |                       |                    |
| CHRNA3  | rs12914385(2594C>T)                            | T/C                  | 3                                               | 4640/2157      | 37.00                     | Allelic        | 1.20(0.91-1.58) | 0.195                                       | 82                 |           |                |                           |                 |                       |                       |                    |
| CHRNA3  | rs7430773(A>C)                                 | G/T                  |                                                 |                |                           |                |                 |                                             |                    |           |                |                           |                 |                       |                       |                    |
| CHRNA3  | rs578776(C>T)                                  | T/C                  |                                                 |                |                           |                |                 |                                             |                    |           |                |                           |                 |                       |                       |                    |
| CHRNA3  | rs938682(T>C, T78896547C)                      | C/T                  |                                                 |                |                           |                |                 |                                             |                    |           |                |                           |                 |                       |                       |                    |
| CHRNA3  | rs6495309(4064C>T)                             | T/C                  |                                                 |                |                           |                |                 |                                             | 3                  | 2635/2767 | 47.83          | Allelic                   | 0.83(0.76-0.91) | 6.17x10 <sup>-5</sup> | 27                    |                    |
| CHRNA5  | rs142774214(rs3841324,-62ins/del,22bp indel)   | 22-bp ins/-          |                                                 |                |                           |                |                 |                                             |                    |           |                |                           |                 |                       |                       |                    |
| CHRNA5  | rs16969968(p.Asp398Asn, c.1192G>A)             | A/G                  | 6                                               | 3305/59780     | 33.76                     | Allelic        | 1.35(1.27-1.44) | 2.03x10 <sup>-21</sup>                      | 0                  | 4         | 2811/2556      | 3.85                      | Allelic         | 0.78(0.33-1.85)       | 0.574                 | 92                 |
| CLPTM1L | rs402710(C>T)                                  | T/C                  | 4                                               | 1801/1908      | 38.29                     | Allelic        | 0.86(0.78-0.94) | 0.002                                       | 0                  | 9         | 5413/6143      | 31.25                     | Allelic         | 0.89(0.82-0.97)       | 0.010                 | 51                 |
| COMT    | rs4680(p.Val158Met,c.472G>A)                   | A/G                  |                                                 |                |                           |                |                 |                                             |                    |           |                |                           |                 |                       |                       |                    |
| CRP     | rs2808630(T>C)                                 | C/T                  |                                                 |                |                           |                |                 |                                             |                    |           |                |                           |                 |                       |                       |                    |
| CTLA4   | rs3087243(g.6230G>A,CT60)                      | A/G                  |                                                 |                |                           |                |                 |                                             |                    |           |                |                           |                 |                       |                       |                    |
| CTLA4   | rs231775(p.Thr17Ala,c.49A>G)                   | G/A                  |                                                 |                |                           |                |                 |                                             |                    |           |                |                           |                 |                       |                       |                    |
| CTLA4   | rs5742909(g.319C>T,-318C>T)                    | T/C                  |                                                 |                |                           |                |                 |                                             | 3                  | 2426/2403 | 67.23          | Allelic                   | 1.08(0.72-1.63) | 0.712                 | 95                    |                    |
| CXCL12  | rs1801157(801G>A)                              | A/G                  |                                                 |                |                           |                |                 |                                             |                    |           |                |                           |                 |                       |                       |                    |
| CXCR2   | rs1126579(C>T)                                 | T/C                  |                                                 |                |                           |                |                 |                                             |                    |           |                |                           |                 |                       |                       |                    |
| CYP17A1 | rs743572(T-34C,A1/A2)                          | G/A                  |                                                 |                |                           |                |                 |                                             |                    |           |                |                           |                 |                       |                       |                    |
| CYP11A1 | rs1799814(m4,Thr461Asn,C>A)                    | A/C                  | 4                                               | 1522/1585      | 5.93                      | Allelic        | 1.30(0.49-3.41) | 0.598                                       | 94                 |           |                |                           |                 |                       |                       |                    |
| CYP11A1 | rs1800031(m3,T5639C)                           | C/T                  |                                                 |                |                           |                |                 |                                             |                    |           |                |                           |                 |                       |                       |                    |
| CYP11A1 | rs2606345(IVS1+606T>G)                         | G/T                  | 3                                               | 2770/3609      | 34.44                     | Allelic        | 1.00(0.91-1.11) | 0.937                                       | 35                 |           |                |                           |                 |                       |                       |                    |
| CYP11A1 | rs4646903(m1,Msp1,T3801C)                      | C/T                  | 21                                              | 5083/6022      | 11.45                     | Allelic        | 1.12(1.03-1.21) | 0.011                                       | 0                  | 15        | 2418/3107      | 36.39                     | Allelic         | 1.18(1.01-1.38)       | 0.036                 | 73                 |
| CYP11A1 | rs1048943(*2C,m2, p.Ile462Val,c.1384A>G)       | G/A                  | 15                                              | 3375/3871      | 6.99                      | Allelic        | 1.27(1.02-1.59) | 0.037                                       | 54                 | 21        | 4265/5242      | 24.90                     | Allelic         | 1.17(1.02-1.35)       | 0.024                 | 73                 |
| CYP11A2 | rs2069514(CYP11A2*1C,-3860G>A)                 | A/G                  | 3                                               | 761/1186       |                           | Dominant       | 1.06(0.50-2.25) | 0.873                                       | 26                 |           |                |                           |                 |                       |                       |                    |
| CYP11A2 | rs2069526(-739T>G)                             | G/T                  |                                                 |                |                           |                |                 |                                             |                    |           |                |                           |                 |                       |                       |                    |
| CYP11A2 | rs35694136(-2467delT/-)                        | -2467delT/-          |                                                 |                |                           |                |                 |                                             |                    |           |                |                           |                 |                       |                       |                    |
| CYP11A2 | rs762551(CYP11A2*1F,c.A-164C)                  | C/A                  | 3                                               | 869/1468       | 26.77                     | Allelic        | 1.38(1.12-1.71) | 0.002                                       | 57                 |           |                |                           |                 |                       |                       |                    |
| CYP11B1 | rs10012(p.Arg48Gly,c.142C>G)                   | G/C                  |                                                 |                |                           |                |                 |                                             |                    |           |                |                           |                 |                       |                       |                    |
| CYP11B1 | rs1056827(p.Ala1198Ser,c.355G>T, m2)           | T/G                  | 3                                               | 975/1684       | 29.42                     | Allelic        | 0.99(0.85-1.16) | 0.904                                       | 21                 |           |                |                           |                 |                       |                       |                    |
| CYP11B1 | rs1800440(p.Asn453Ser,Ex3+315A>G)              | G/A                  | 4                                               | 2809/3687      | 19.01                     | Allelic        | 0.95(0.81-1.11) | 0.530                                       | 47                 |           |                |                           |                 |                       |                       |                    |
| CYP11B1 | rs1056836(CYP11B1*3,p.Leu432Val,c.1294C>G)     | G/C                  | 6                                               | 1849/2655      | 43.71                     | Allelic        | 1.12(1.02-1.22) | 0.013                                       | 0                  | 3         | 770/764        | 13.68                     | Allelic         | 1.07(0.82-1.39)       | 0.633                 | 37                 |
| CYP2A13 | rs192789(p.Arg257Cys,3375C>T)                  | T/C                  |                                                 |                |                           |                |                 |                                             |                    |           |                |                           |                 |                       |                       |                    |
| CYP2A6  | non*4/*4(*1/*4, a deletion of the CYP2A6 gene) | del/- (*4/non*4)     |                                                 |                |                           |                |                 |                                             |                    |           |                |                           |                 |                       |                       |                    |
| CYP2A6  | rs1801272(p.Leu160His,Ex3-15T>A)               | A/T                  | 3                                               | 2411/2644      | 3.99                      | Dominant       | 0.66(0.52-0.84) | 0.001                                       | 0                  | 6         | 2517/2264      | 14.66                     | Allelic         | 0.81(0.64-1.03)       | 0.089                 | 71                 |
| CYP2A6  | rs5031016(p.Ile471Thr,c1412T>C,wu/*7)          | C/T                  |                                                 |                |                           |                |                 |                                             |                    |           |                |                           |                 |                       |                       |                    |
| CYP2C9  | rs1799853(p.Arg144Cys,c.430C>T)                | T/C                  | 3                                               | 604/1054       |                           | Dominant       | 1.19(0.85-1.68) | 0.319                                       | 48                 |           |                |                           |                 |                       |                       |                    |
| CYP2D6  | phenotype (EM/HEM/PM)                          | NA                   | 8                                               | 1327/1787      | 5.54                      | PM vs EM       | 0.90(0.60-1.34) | 0.595                                       | 7                  |           |                |                           |                 |                       |                       |                    |
| CYP2D6  | rs1065852(p.Pro34Ser,188C>T)                   | C/T                  |                                                 |                |                           |                |                 |                                             |                    |           |                |                           |                 |                       |                       |                    |
| CYP2E1  | rs2031920(RsaI, c1>c2,-1053C>T)                | T/C                  | 6                                               | 665/1224       | 4.90                      | Allelic        | 0.61(0.42-0.90) | 0.013                                       | 0                  | 11        | 3370/3951      | 23.40                     | Allelic         | 0.89(0.77-1.04)       | 0.152                 | 66                 |
| CYP2E1  | rs3813867(g.3739G>C,c.-1293G>C)                | C/G                  |                                                 |                |                           |                |                 |                                             |                    |           |                |                           |                 |                       |                       |                    |
| CYP2E1  | rs6413432(c.967+1143T>A,7632T>A)               | A/T                  | 4                                               | 441/358        | 11.52                     | Allelic        | 0.79(0.58-1.06) | 0.121                                       | 0                  | 6         | 1964/2085      | 26.55                     | Allelic         | 0.78(0.70-0.86)       | 1.31x10 <sup>-6</sup> | 0                  |
| CYP3A4  | rs2740574(-392A>G,*1A/*1B)                     | G/A                  | 3                                               | 1665/1979      |                           | Dominant       | 1.08(0.84-1.39) | 0.561                                       | 6                  |           |                |                           |                 |                       |                       |                    |
| CYP3A5  | rs776746(A6986G,CYP3A5*3,22892A>G)             | A/G                  |                                                 |                |                           |                |                 |                                             |                    |           |                |                           |                 |                       |                       |                    |
| DRD2    | rs1079597(G>A, TaqI-)                          | A/G                  | 3                                               | 461/537        |                           | Dominant       | 1.04(0.79-1.37) | 0.781                                       | 0                  |           |                |                           |                 |                       |                       |                    |
| DRD2    | rs1800497(p.Glu714Lys,A2/A1,C>T)               | C/T                  | 3                                               | 510/621        |                           | Recessive      | 1.00(0.69-1.44) | 0.986                                       | 0                  |           |                |                           |                 |                       |                       |                    |
| EGF     | rs4444903(+61A>G)                              | G/A                  |                                                 |                |                           |                |                 |                                             |                    |           |                |                           |                 |                       |                       |                    |
| ELANE   | rs351107(-903T>G,Rep_a)                        | G/T                  | 3                                               | 745/762        | 5.31                      | Allelic        | 0.55(0.34-0.87) | 0.011                                       | 29                 |           |                |                           |                 |                       |                       |                    |
| ELANE   | rs7254054(-741G>A,Rep_b)                       | A/G                  | 3                                               | 754/750        | 27.20                     | Allelic        | 0.77(0.61-0.97) | 0.030                                       | 46                 |           |                |                           |                 |                       |                       |                    |

| Gene            | Variant                                                                        | Alleles <sup>a</sup> | Meta-analysis performed in Caucasian population |                |                           |                 |                 |         | Meta-analysis performed in Asian population |         |                |                           |                      |                 |                       |      |
|-----------------|--------------------------------------------------------------------------------|----------------------|-------------------------------------------------|----------------|---------------------------|-----------------|-----------------|---------|---------------------------------------------|---------|----------------|---------------------------|----------------------|-----------------|-----------------------|------|
|                 |                                                                                |                      | Studies                                         | Cases/Controls | Frequency(%) <sup>b</sup> | Genetic models  | OR (95% CI)     | P value | F(%)                                        | Studies | Cases/Controls | Frequency(%) <sup>b</sup> | Genetic models       | OR (95% CI)     | P value               | F(%) |
| <i>EPHX1</i>    | rs1051740(p.Tyr113His.c.337T>C)                                                | C/T                  | 12                                              | 2560/5862      | 31.06                     | Allelic         | 0.88(0.74-1.04) | 0.123   | 77                                          |         |                |                           |                      |                 |                       |      |
| <i>EPHX1</i>    | rs2234922(p.His139Arg.c.416A>G)                                                | G/A                  | 13                                              | 4410/7749      | 18.91                     | Allelic         | 1.12(0.94-1.34) | 0.195   | 79                                          |         |                |                           |                      |                 |                       |      |
| <i>ERCC1</i>    | rs11615(rs3177700.p.Asn118Asn.c.354T>C)                                        | C/T                  | 7                                               | 3544/4862      | 39.68                     | Allelic         | 0.89(0.79-1.01) | 0.064   | 60                                          | 5       | 2187/2196      | 76.66                     | Allelic              | 0.91(0.79-1.06) | 0.224                 | 49   |
| <i>ERCC1</i>    | rs16979802(15310G>C)                                                           | C/G                  | 3                                               | 1311/2114      | 21.81                     | Allelic         | 0.87(0.74-1.03) | 0.102   | 0                                           |         |                |                           |                      |                 |                       |      |
| <i>ERCC1</i>    | rs2298881(262G>T, C>A)                                                         | T/G                  |                                                 |                |                           |                 |                 |         |                                             | 3       | 2305/2315      | 42.07                     | Allelic              | 1.00(0.90-1.11) | 0.986                 | 33   |
| <i>ERCC1</i>    | rs3212948(C>G)                                                                 | G/C                  | 3                                               | 1034/1446      | 42.98                     | Allelic         | 1.01(0.84-1.20) | 0.960   | 55                                          |         |                |                           |                      |                 |                       |      |
| <i>ERCC1</i>    | rs3212955(A>G)                                                                 | G/A                  | 3                                               | 1287/1857      | 24.21                     | Allelic         | 1.05(0.93-1.20) | 0.415   | 9                                           |         |                |                           |                      |                 |                       |      |
| <i>ERCC1</i>    | rs3212961(IVS5+33C>A,17677C>A)                                                 | A/C                  | 3                                               | 771/883        | 14.84                     | Allelic         | 0.93(0.77-1.13) | 0.485   | 0                                           | 3       | 1436/1428      | 48.28                     | Allelic              | 0.96(0.82-1.12) | 0.584                 | 37   |
| <i>ERCC1</i>    | rs3212986(8092C>A,14443C>A)                                                    | A/C                  | 4                                               | 3091/3489      | 25.24                     | Allelic         | 1.00(0.92-1.08) | 0.986   | 0                                           |         |                |                           |                      |                 |                       |      |
| <i>ERCC1</i>    | rs735482(p.Lys261Thr.A>C)                                                      | C/A                  | 3                                               | 1287/2365      | 14.63                     | Allelic         | 0.94(0.82-1.08) | 0.390   | 0                                           |         |                |                           |                      |                 |                       |      |
| <i>ERCC2</i>    | rs1052555(Asp711Asp.G>A)                                                       | A/G                  |                                                 |                |                           |                 |                 |         |                                             |         |                |                           |                      |                 |                       |      |
| <i>ERCC2</i>    | rs171140(A>C)                                                                  | C/A                  |                                                 |                |                           |                 |                 |         |                                             |         |                |                           |                      |                 |                       |      |
| <i>ERCC2</i>    | rs13181(p.Lys751Gln.c.2251A>C)                                                 | C/A                  | 19                                              | 5967/8851      | 36.08                     | Allelic         | 1.10(1.03-1.18) | 0.003   | 32                                          | 15      | 5878/6060      | 7.90                      | Allelic              | 1.12(0.95-1.33) | 0.170                 | 61   |
| <i>ERCC2</i>    | rs1799787(IVS19-70C>T,G>A)                                                     | T/C                  |                                                 |                |                           |                 |                 |         |                                             | 3       | 688/756        | 7.34                      | Allelic              | 0.90(0.51-1.62) | 0.733                 | 74   |
| <i>ERCC2</i>    | rs1799793(p.Asp312Asn.c.981G>A)                                                | A/G                  | 15                                              | 5165/7680      | 34.91                     | Allelic         | 1.02(0.96-1.08) | 0.542   | 11                                          | 10      | 4797/5010      | 5.76                      | Allelic              | 1.00(0.79-1.28) | 0.976                 | 68   |
| <i>ERCC2</i>    | rs238406(p.Arg156Arg.C>A)                                                      | A/C                  | 3                                               | 1150/2080      | 42.76                     | Allelic         | 1.13(1.01-1.25) | 0.026   | 0                                           |         |                |                           |                      |                 |                       |      |
| <i>ERCC4</i>    | rs1799801(p.Ser835Ser,Ex11-247T>C)                                             | C/T                  |                                                 |                |                           |                 |                 |         |                                             |         |                |                           |                      |                 |                       |      |
| <i>ERCC4</i>    | rs1800067(Arg415Gln)                                                           | A/G                  | 5                                               | 1521/2420      | 6.78                      | Allelic         | 1.10(0.92-1.32) | 0.286   | 0                                           |         |                |                           |                      |                 |                       |      |
| <i>ERCC5</i>    | rs1047768(p.His46His.335C>T)                                                   | T/C                  | 3                                               | 1331/2136      | 42.51                     | Allelic         | 0.86(0.72-1.04) | 0.114   | 63                                          |         |                |                           |                      |                 |                       |      |
| <i>ERCC5</i>    | rs17655(p.Asp1104His.c.3310G>C)                                                | C/G                  | 4                                               | 1249/2203      | 22.95                     | Allelic         | 0.95(0.78-1.14) | 0.570   | 47                                          | 5       | 2024/2683      | 56.71                     | Allelic              | 0.90(0.75-1.08) | 0.248                 | 71   |
| <i>ERCC6</i>    | rs3793784(-6530C>G)                                                            | G/C                  |                                                 |                |                           |                 |                 |         |                                             |         |                |                           |                      |                 |                       |      |
| <i>ERCC6</i>    | rs2228528(p.Gly399Asp.G1275A)                                                  | T/C                  |                                                 |                |                           |                 |                 |         |                                             | 3       | 1713/1887      | 43.91                     | Allelic              | 1.03(0.92-1.17) | 0.591                 | 31   |
| <i>EXO1</i>     | rs1047840(p.Glu589Lys.c.1765G>A)                                               | A/G                  |                                                 |                |                           |                 |                 |         |                                             |         |                |                           |                      |                 |                       |      |
| <i>FANCG</i>    | rs2237857(p.Thr297Ile.C1382T)                                                  | T/C                  |                                                 |                |                           |                 |                 |         |                                             |         |                |                           |                      |                 |                       |      |
| <i>FAS</i>      | rs2234767(-1377G>A)                                                            | A/G                  |                                                 |                |                           |                 |                 |         |                                             | 3       | 1857/2149      | 36.81                     | Allelic              | 1.12(0.94-1.35) | 0.216                 | 72   |
| <i>FASLG</i>    | rs763110(-844C>T)                                                              | T/C                  |                                                 |                |                           |                 |                 |         |                                             | 3       | 1857/2149      | 30.97                     | Allelic              | 0.77(0.58-1.01) | 0.063                 | 86   |
| <i>FGFR4</i>    | rs351855(p.Gly388Arg.G>A)                                                      | A/G                  |                                                 |                |                           |                 |                 |         |                                             |         |                |                           |                      |                 |                       |      |
| <i>GPC5</i>     | rs2352028(C>T)                                                                 | T/C                  |                                                 |                |                           |                 |                 |         |                                             | 3       | 1648/2002      | 21.65                     | Allelic              | 0.97(0.87-1.09) | 0.611                 | 0    |
| <i>GPX1</i>     | rs1050450(p.Pro200Leu.c.599C>T)                                                | T/C                  |                                                 |                |                           |                 |                 |         |                                             |         |                |                           |                      |                 |                       |      |
| <i>GSTM1</i>    | Present/Null(Large gene deletion)                                              | NA                   | 58                                              | 16976/20622    | 51.28                     | Null vs present | 1.08(1.03-1.13) | 0.001   | 7                                           | 36      | 11012/9982     | 50.56                     | Null vs present      | 1.27(1.14-1.41) | 9.06×10 <sup>-6</sup> | 65   |
| <i>GSTM3</i>    | rs179735(c.-468+21delAGG.3bp deletion.*A/B)                                    | delAGG/-             | 6                                               | 1427/1613      | 15.25                     | Allelic         | 1.00(0.87-1.15) | 0.956   | 0                                           |         |                |                           |                      |                 |                       |      |
| <i>GSTP1</i>    | rs1138272(p.Ala114Val.c.341C>T)                                                | T/C                  | 6                                               | 1479/1573      | 7.63                      | Allelic         | 1.24(0.93-1.65) | 0.149   | 53                                          |         |                |                           |                      |                 |                       |      |
| <i>GSTP1</i>    | rs1695 (p.Ile105Val.c.313A>G)                                                  | G/A                  | 26                                              | 9151/10531     | 32.85                     | Allelic         | 1.04(0.98-1.09) | 0.224   | 29                                          | 11      | 2307/2430      | 18.87                     | Allelic              | 1.14(1.01-1.29) | 0.036                 | 27   |
| <i>GSTT1</i>    | Present/Null(Large gene deletion)                                              | NA                   | 38                                              | 12560/15525    | 18.88                     | Null vs present | 1.01(0.92-1.10) | 0.910   | 45                                          | 14      | 7043/5289      | 49.57                     | Null vs present      | 1.15(1.03-1.28) | 0.010                 | 34   |
| <i>HIF1A</i>    | rs11549465(p.Pro582Ser.c.1744C>T)                                              | T/C                  |                                                 |                |                           |                 |                 |         |                                             |         |                |                           |                      |                 |                       |      |
| <i>HIF1A</i>    | rs11549467(p.Ala588Thr.c.1762G>A)                                              | A/G                  |                                                 |                |                           |                 |                 |         |                                             |         |                |                           |                      |                 |                       |      |
| <i>HRAS1</i>    | common/rare (HRAS1 VNTR alleles, loss of heterozygosity in the 15p15.5 region) | NA                   | 4                                               | 746/1174       | 7.03                      | rare vs common  | 2.55(1.01-6.45) | 0.048   | 69                                          |         |                |                           |                      |                 |                       |      |
| <i>HYKK</i>     | rs931794(A>G)                                                                  | G/A                  |                                                 |                |                           |                 |                 |         |                                             |         |                |                           |                      |                 |                       |      |
| <i>IFNG</i>     | rs2069705(-1615T>C)                                                            | C/T                  |                                                 |                |                           |                 |                 |         |                                             |         |                |                           |                      |                 |                       |      |
| <i>IGFBP3</i>   | rs2854744(C-202A)                                                              | C/A                  |                                                 |                |                           |                 |                 |         |                                             | 3       | 789/960        | 27.71                     | Allelic              | 0.79(0.52-1.20) | 0.262                 | 86   |
| <i>IL10</i>     | rs1800871(c.-854T>C,-819C>T)                                                   | T/C                  | 5                                               | 1741/2296      | 6.82                      | Allelic         | 1.03(0.81-1.31) | 0.820   | 0                                           | 4       | 959/1367       | 69.09                     | Allelic              | 0.84(0.54-1.32) | 0.447                 | 91   |
| <i>IL10</i>     | rs1800872(g.4433A>C,-592C>A)                                                   | A/C                  | 3                                               | 2368/2869      | 22.85                     | Allelic         | 0.98(0.89-1.08) | 0.677   | 0                                           | 3       | 842/1257       | 66.31                     | Allelic              | 0.76(0.62-0.93) | 0.009                 | 56   |
| <i>IL10</i>     | rs1800896(g.3943A>G,-1082A>G)                                                  | G/A                  | 6                                               | 2190/2729      | 47.62                     | Allelic         | 1.08(0.92-1.27) | 0.347   | 49                                          | 3       | 627/1029       | 10.11                     | Allelic              | 1.83(0.75-4.49) | 0.188                 | 88   |
| <i>IL13</i>     | rs1800925(-1069C>T,-1112C>T)                                                   | T/C                  |                                                 |                |                           |                 |                 |         |                                             |         |                |                           |                      |                 |                       |      |
| <i>IL13</i>     | rs20541(Arg130Gln,+2044G>A)                                                    | A/G                  |                                                 |                |                           |                 |                 |         |                                             |         |                |                           |                      |                 |                       |      |
| <i>IL17A</i>    | rs2275913(-73G>A,-152G>A)                                                      | A/G                  |                                                 |                |                           |                 |                 |         |                                             |         |                |                           |                      |                 |                       |      |
| <i>IL1B</i>     | rs1143634(p.Phe105Phe,Ex5+14C>T)                                               | T/C                  | 3                                               | 4045/3627      | 23.55                     | Allelic         | 1.02(0.94-1.10) | 0.666   | 0                                           |         |                |                           |                      |                 |                       |      |
| <i>IL1B</i>     | rs1143627(g.4970C>T,-31T>C)                                                    | C/T                  | 4                                               | 3681/4142      | 33.23                     | Allelic         | 0.98(0.87-1.10) | 0.757   | 60                                          | 3       | 1352/1906      | 48.87                     | Allelic              | 0.89(0.71-1.10) | 0.277                 | 75   |
| <i>IL1B</i>     | rs16944(C-511T)                                                                | T/C                  |                                                 |                |                           |                 |                 |         |                                             | 7       | 2391/2858      | 47.10                     | Allelic              | 0.92(0.78-1.09) | 0.343                 | 75   |
| <i>IL4</i>      | rs2243250(-509C>T)                                                             | T/C                  |                                                 |                |                           |                 |                 |         |                                             | 3       | 1691/1737      | 78.12                     | Allelic              | 1.18(0.88-1.59) | 0.276                 | 76   |
| <i>IL6</i>      | rs1800795(G-174C)                                                              | C/G                  | 8                                               | 4385/5232      | 43.43                     | Allelic         | 1.01(0.95-1.07) | 0.721   | 0                                           |         |                |                           |                      |                 |                       |      |
| <i>IL6</i>      | rs1800796(-572C>G,634C>G)                                                      | G/C                  |                                                 |                |                           |                 |                 |         |                                             | 8       | 2782/3195      | 22.35                     | Allelic              | 1.04(0.83-1.31) | 0.713                 | 82   |
| <i>IL8</i>      | rs4073(T-251A)                                                                 | T/A                  | 4                                               | 4308/4773      | 49.36                     | Allelic         | 1.00(0.94-1.06) | 0.973   | 0                                           |         |                |                           |                      |                 |                       |      |
| <i>LIG1</i>     | rs156641(G>A)                                                                  | A/G                  | 3                                               | 1000/1940      | 34.48                     | Allelic         | 1.09(0.90-1.32) | 0.396   | 44                                          |         |                |                           |                      |                 |                       |      |
| <i>LIG1</i>     | rs20579(-7C>T)                                                                 | A/G                  | 3                                               | 1140/2079      | 12.84                     | Allelic         | 1.25(0.84-1.86) | 0.279   | 80                                          |         |                |                           |                      |                 |                       |      |
| <i>LIG1</i>     | rs20581(p.Asp802Asp.G>A)                                                       | A/G                  |                                                 |                |                           |                 |                 |         |                                             |         |                |                           |                      |                 |                       |      |
| <i>LIG1</i>     | rs3730931(IVS9-21A>G)                                                          | G/A                  | 3                                               | 1145/2084      | 12.00                     | Allelic         | 1.15(0.78-1.70) | 0.479   | 77                                          |         |                |                           |                      |                 |                       |      |
| <i>LIG1</i>     | rs439132(A>G)                                                                  | G/A                  |                                                 |                |                           |                 |                 |         |                                             |         |                |                           |                      |                 |                       |      |
| <i>LIG1</i>     | rs20580(p.Ala170Ala.c.417C>A)                                                  | A/C                  | 3                                               | 1412/2214      | 48.85                     | Allelic         | 1.01(0.88-1.17) | 0.876   | 47                                          |         |                |                           |                      |                 |                       |      |
| <i>LIG4</i>     | rs1805388(p.Thr9Ile,Ex2+54C>T)                                                 | T/C                  |                                                 |                |                           |                 |                 |         |                                             |         |                |                           |                      |                 |                       |      |
| <i>LTA</i>      | rs909253(A+25G)                                                                | G/A                  | 4                                               | 234/596        | 31.12                     | Allelic         | 1.10(0.87-1.41) | 0.428   | 0                                           |         |                |                           |                      |                 |                       |      |
| <i>MAPKAPK2</i> | CNV-30450(2copies/3copies/4copies)                                             | NA                   |                                                 |                |                           |                 |                 |         |                                             |         |                |                           |                      |                 |                       |      |
| <i>MBD4</i>     | rs140693(p.Glu346Lys.G1212A)                                                   | A/G                  |                                                 |                |                           |                 |                 |         |                                             | 3       | 2332/2480      | 9.76                      | 4 copies vs 2 copies | 1.60(1.04-2.45) | 0.031                 | 81   |
| <i>MCP1</i>     | rs1024611(-2518A>G,PvuII)                                                      | G/A                  |                                                 |                |                           |                 |                 |         |                                             | 4       | 2295/2469      | 35.62                     | Allelic              | 0.99(0.86-1.13) | 0.881                 | 57   |
| <i>MDM2</i>     | rs117039649(G>C,SNP285)                                                        | C/G                  |                                                 |                |                           |                 |                 |         |                                             |         |                |                           |                      |                 |                       |      |
| <i>MDM2</i>     | rs2279744(SNP309.c.14-309T>G)                                                  | G/T                  | 7                                               | 5541/7830      | 37.31                     | Allelic         | 1.00(0.93-1.08) | 0.979   | 45                                          | 8       | 5013/5834      | 49.07                     | Allelic              | 1.13(1.03-1.24) | 0.011                 | 64   |
| <i>MDM2</i>     | rs769412(p.Glu184Glu,2164A>G,SNP354)                                           | G/A                  | 3                                               | 1574/1715      | 29.53                     | Allelic         | 1.01(0.90-1.13) | 0.889   | 0                                           |         |                |                           |                      |                 |                       |      |
| <i>MGMT</i>     | rs12268840(C>T)                                                                | T/C                  | 3                                               | 247/355        | 32.82                     | Allelic         | 0.88(0.64-1.19) | 0.396   | 24                                          |         |                |                           |                      |                 |                       |      |
| <i>MGMT</i>     | rs12917(p.Leu115Phe.c.343C>T)                                                  | T/C                  | 5                                               | 1930/3022      | 14.36                     | Allelic         | 1.08(0.94-1.24) | 0.292   | 14                                          |         |                |                           |                      |                 |                       |      |
| <i>MGMT</i>     | rs1803965(Leu53Leu,171C>T,TagI)                                                | T/C                  |                                                 |                |                           |                 |                 |         |                                             |         |                |                           |                      |                 |                       |      |
| <i>MGMT</i>     | rs2308321(p.Ile174Val,Ile143Val.c.520A>G)                                      | G/A                  | 5                                               | 1942/2110      | 12.68                     | Allelic         | 1.02(0.85-1.23) | 0.809   | 33                                          |         |                |                           |                      |                 |                       |      |
| <i>MGMT</i>     | rs2308327(p.Lys178Arg.c.533A>G)                                                | G/A                  | 5                                               | 759/880        | 20.45                     | Allelic         | 0.73(0.50-1.07) | 0.109   | 68                                          |         |                |                           |                      |                 |                       |      |
| <i>MIR146A</i>  | rs2910164(C>G)                                                                 | C/G                  |                                                 |                |                           |                 |                 |         |                                             | 4       | 2807/2841      | 49.03                     | Allelic              | 1.12(1.04-1.21) | 0.002                 | 0    |
| <i>MIR196A2</i> | rs11614913(T>C)                                                                | C/T                  |                                                 |                |                           |                 |                 |         |                                             | 4       | 2376/2413      | 45.86                     | Allelic              | 1.14(1.05-1.23) | 0.002                 | 0    |
| <i>MLH1</i>     | rs1799977(p.Ile219Val.c.655A>G)                                                | G/A                  |                                                 |                |                           |                 |                 |         |                                             | 3       | 1713/1874      | 3.98                      | Allelic              | 1.03(0.59-1.79) | 0.927                 | 69   |
| <i>MLH1</i>     | rs1800734(-93G>A)                                                              | A/G                  |                                                 |                |                           |                 |                 |         |                                             | 4       | 1756/1809      | 57.19                     | Allelic              | 1.03(0.86-1.23) |                       |      |





| Gene         | Variant                         | Alleles <sup>a</sup> | Meta-analysis performed in Caucasian population |                |                           |                |                 |         | Meta-analysis performed in Asian population |           |                |                           |                 |                 |         |                    |
|--------------|---------------------------------|----------------------|-------------------------------------------------|----------------|---------------------------|----------------|-----------------|---------|---------------------------------------------|-----------|----------------|---------------------------|-----------------|-----------------|---------|--------------------|
|              |                                 |                      | Studies                                         | Cases/Controls | Frequency(%) <sup>b</sup> | Genetic models | OR (95% CI)     | P value | I <sup>2</sup> (%)                          | Studies   | Cases/Controls | Frequency(%) <sup>b</sup> | Genetic models  | OR (95% CI)     | P value | I <sup>2</sup> (%) |
| <i>XRCC1</i> | rs3547(p.Gln632Gln,c.1896G>A)   | A/G                  |                                                 |                |                           |                |                 |         | 4                                           | 2686/2755 | 9.87           | Allelic                   | 1.33(1.04-1.69) | 0.021           | 74      |                    |
| <i>XRCC1</i> | rs3213245(-77T>C)               | C/T                  |                                                 |                |                           |                |                 |         |                                             |           |                |                           |                 |                 |         |                    |
| <i>XRCC2</i> | rs3218536(p.Arg188His,c.563G>A) | A/G                  | 3                                               | 645/1373       | 8.08                      | Allelic        | 1.23(0.54-2.77) | 0.625   | 88                                          |           |                |                           |                 |                 |         |                    |
| <i>XRCC3</i> | rs1799794(4541A>G)              | G/A                  |                                                 |                |                           |                |                 |         |                                             |           |                |                           |                 |                 |         |                    |
| <i>XRCC3</i> | rs1799796(17893A>G,IVS5-14)     | G/A                  | 3                                               | 665/1672       | 31.19                     | Allelic        | 0.98(0.85-1.14) | 0.827   | 0                                           |           |                |                           |                 |                 |         |                    |
| <i>XRCC3</i> | rs861539(p.Thr241Met,c.722C>T)  | T/C                  | 9                                               | 2271/3339      | 36.63                     | Allelic        | 0.97(0.90-1.06) | 0.541   | 0                                           | 7         | 3805/4330      | 6.91                      | Allelic         | 1.20(0.98-1.47) | 0.072   | 63                 |

Chr=chromosome; OR=odds ratio, 95% CI = 95% confidence interval; bp=base pair; VNTR=variable number of tandem repeats; ins=insertion; NA = Not Applicable.

<sup>a</sup>Minor alleles/major alleles (per Caucasian).

<sup>b</sup>Frequency of minor allele or effect genotype(s) in controls in specific ethnicity.



Supplementary Table S5. Subgroup meta-analyses stratified by different histological types of lung cancer for variants with sufficient data under different genetic models

(Continued on next two pages)

| Genes         | Sub-group | Variants                                       | Comparison*     | Results of meta-analysis using allelic model |           |                 |                        |            |         | Results of meta-analysis using dominant model |                             |                 |                       |                |      | Results of meta-analysis using recessive model |           |                    |                             |         |      |                |  |            |         |                    |                             |
|---------------|-----------|------------------------------------------------|-----------------|----------------------------------------------|-----------|-----------------|------------------------|------------|---------|-----------------------------------------------|-----------------------------|-----------------|-----------------------|----------------|------|------------------------------------------------|-----------|--------------------|-----------------------------|---------|------|----------------|--|------------|---------|--------------------|-----------------------------|
|               |           |                                                |                 | Studies                                      |           | Cases/Controls  |                        | OR(95% CI) | P value | I <sup>2</sup> (%)                            | P <sub>0</sub> <sup>b</sup> | Studies         |                       | Cases/Controls |      | OR(95% CI)                                     | P value   | I <sup>2</sup> (%) | P <sub>0</sub> <sup>b</sup> | Studies |      | Cases/Controls |  | OR(95% CI) | P value | I <sup>2</sup> (%) | P <sub>0</sub> <sup>b</sup> |
|               |           |                                                |                 |                                              |           |                 |                        |            |         |                                               |                             |                 |                       |                |      |                                                |           |                    |                             |         |      |                |  |            |         |                    |                             |
| <i>CHRNA5</i> | SCLC      | rs1696968(p.Asp398Asn.c.1192G>A)               | A vs G          | 3                                            | 513/3253  | 1.55(1.15-2.10) | 0.004                  | 55         | 0.109   |                                               |                             |                 |                       |                |      |                                                |           |                    |                             |         |      |                |  |            |         |                    |                             |
| <i>CYP1A1</i> | SCLC      | rs4646903(m.I.MspI.T3801C)                     | C vs T          | 14                                           | 325/2955  | 1.05(0.84-1.32) | 0.650                  | 0          | 0.879   | 17                                            | 494/3409                    | 1.00(0.79-1.28) | 0.979                 | 0              | 0.77 | 12                                             | 273/2545  | 1.71(1.08-2.71)    | 0.021                       | 0       | 0.90 |                |  |            |         |                    |                             |
| <i>CYP1A1</i> | SCLC      | rs1048943(*C2.m.p.IIe462Val.c.1384A>G)         | G vs A          | 11                                           | 402/2172  | 1.06(0.74-1.53) | 0.752                  | 46         | 0.050   | 11                                            | 422/2218                    | 0.83(0.53-1.29) | 0.403                 | 40             | 0.08 | 7                                              | 285/1143  | 1.93(0.79-4.72)    | 0.149                       | 47      | 0.08 |                |  |            |         |                    |                             |
| <i>CYP2D6</i> | SCLC      | phenotype(EM/HEM/PM)                           | PM vs EM        | 4                                            | 93/433    | 1.01(0.31-3.27) | 0.986                  | 0          | 0.438   | 5                                             | 117/509                     | 0.80(0.50-1.28) | 0.349                 | 0              | 0.73 | 4                                              | 16/228    | 1.12(0.35-3.58)    | 0.849                       | 0       | 0.44 |                |  |            |         |                    |                             |
| <i>CYP2E1</i> | SCLC      | rs6413432(c.967+1143T>A.7632T>A)               | A vs T          | 6                                            | 254/1809  | 0.91(0.54-1.52) | 0.714                  | 56         | 0.044   | 6                                             | 254/1809                    | 1.05(0.56-1.97) | 0.866                 | 61             | 0.03 | 5                                              | 250/1771  | 0.70(0.23-2.07)    | 0.514                       | 24      | 0.26 |                |  |            |         |                    |                             |
| <i>CYP2E1</i> | SCLC      | rs2031920(RsaI.c1>c2.-1053C>T)                 | T vs C          | 6                                            | 390/310   | 0.80(0.56-1.14) | 0.215                  | 57         | 0.041   | 6                                             | 390/310                     | 0.70(0.46-1.07) | 0.102                 | 56             | 0.05 | 5                                              | 346/2404  | 1.45(0.47-4.53)    | 0.521                       | 69      | 0.01 |                |  |            |         |                    |                             |
| <i>ERCC2</i>  | SCLC      | rs1799793(p.Asp312Asn.c.981G>A)                | A vs G          | 3                                            | 303/1321  | 1.20(0.90-1.60) | 0.221                  | 0          | 0.571   |                                               |                             |                 |                       |                |      |                                                |           |                    |                             |         |      |                |  |            |         |                    |                             |
| <i>GSTM1</i>  | SCLC      | Present/Null(Large gene deletion)              | Null vs present | 26                                           | 1224/7255 | 1.30(1.09-1.56) | 0.004                  | 43         | 0.010   |                                               |                             |                 |                       |                |      |                                                |           |                    |                             |         |      |                |  |            |         |                    |                             |
| <i>GSTP1</i>  | SCLC      | rs1695(p.IIe105Val.c.313A>G)                   | G vs A          | 8                                            | 533/3555  | 1.12(0.97-1.29) | 0.122                  | 0          | 0.847   | 10                                            | 678/3932                    | 1.02(0.86-1.22) | 0.811                 | 0              | 0.45 | 8                                              | 533/3555  | 1.34(1.00-1.79)    | 0.054                       | 0       | 0.62 |                |  |            |         |                    |                             |
| <i>GSTT1</i>  | SCLC      | Present/Null(Large gene deletion)              | Null vs present | 16                                           | 762/4200  | 1.07(0.86-1.32) | 0.561                  | 0          | 0.952   |                                               |                             |                 |                       |                |      |                                                |           |                    |                             |         |      |                |  |            |         |                    |                             |
| <i>MDM2</i>   | SCLC      | rs2279744(SNP309.c.14+309T>G)                  | G vs T          | 3                                            | 265/2309  | 0.85(0.70-1.04) | 0.117                  | 13         | 0.318   | 3                                             | 265/2309                    | 0.77(0.58-1.03) | 0.078                 | 0              | 0.92 | 3                                              | 265/2309  | 0.81(0.46-1.42)    | 0.453                       | 59      | 0.09 |                |  |            |         |                    |                             |
| <i>MPO</i>    | SCLC      | rs2333227(G-463A)                              | A vs G          | 3                                            | 329/2783  | 0.90(0.70-1.16) | 0.420                  | 30         | 0.242   | 3                                             | 392/2783                    | 0.91(0.66-1.26) | 0.570                 | 40             | 0.19 | 3                                              | 392/2783  | 0.74(0.43-1.29)    | 0.289                       | 0       | 0.81 |                |  |            |         |                    |                             |
| <i>NAT2</i>   | SCLC      | Rapid/slow(Acetylation Phenotype)              | Slow vs rapid   | 4                                            | 234/1993  | 1.26(0.89-1.77) | 0.195                  | 0          | 0.867   |                                               |                             |                 |                       |                |      |                                                |           |                    |                             |         |      |                |  |            |         |                    |                             |
| <i>NQO1</i>   | SCLC      | rs1800566(p.Pro187Ser.c.648C>T.609C>T.*2)      | T vs C          | 3                                            | 205/792   | 1.68(1.02-2.68) | 0.029                  | 56         | 0.102   | 4                                             | 264/1152                    | 1.58(0.98-2.58) | 0.063                 | 59             | 0.06 | 3                                              | 205/792   | 2.32(0.93-5.78)    | 0.071                       | 0       | 0.80 |                |  |            |         |                    |                             |
| <i>OGG1</i>   | SCLC      | rs1052133(p.Ser326Cys.c.977C>G.8055C>G)        | G vs C          | 4                                            | 376/2129  | 0.88(0.71-1.08) | 0.225                  | 26         | 0.254   | 3                                             | 165/1444                    | 0.71(0.43-1.18) | 0.192                 | 37             | 0.20 | 4                                              | 220/2474  | 1.14(0.65-1.99)    | 0.66                        | 53      | 0.09 |                |  |            |         |                    |                             |
| <i>PADPRP</i> | SCLC      | A/B (a 193-bp deletion)                        | Del vs non-del  | 3                                            | 107/512   | 0.87(0.55-1.38) | 0.555                  | 0          | 0.913   | 3                                             | 30/339                      | 0.81(0.34-1.95) | 0.641                 | 0              | 0.66 |                                                |           |                    |                             |         |      |                |  |            |         |                    |                             |
| <i>TNF</i>    | SCLC      | rs1800629(G-308A.*1/*2)                        | A vs G          | 3                                            | 107/512   | 0.87(0.55-1.38) | 0.555                  | 0          | 0.913   | 3                                             | 107/512                     | 0.89(0.53-1.49) | 0.659                 | 0              | 0.75 | 3                                              | 107/512   | 0.83(0.18-3.84)    | 0.813                       | 0       | 0.74 |                |  |            |         |                    |                             |
| <i>TP53</i>   | SCLC      | rs1042522(p.Pro72Arg.c.215C>G)                 | C vs G          | 15                                           | 835/4556  | 0.97(0.72-1.29) | 0.814                  | 80         | 0.000   | 15                                            | 714/4455                    | 0.93(0.64-1.35) | 0.706                 | 73             | 0.00 | 14                                             | 624/3871  | 1.18(0.72-1.91)    | 0.515                       | 65      | 0.00 |                |  |            |         |                    |                             |
| <i>XPC</i>    | SCLC      | PAT-/- (24660_24664delGTAAc. inspoly(AT))      | Ins vs non-ins  | 3                                            | 208/1340  | 0.86(0.58-1.27) | 0.443                  | 69         | 0.040   | 3                                             | 208/1340                    | 0.72(0.48-1.09) | 0.122                 | 46             | 0.16 | 3                                              | 208/1340  | 1.05(0.56-1.95)    | 0.882                       | 52      | 0.13 |                |  |            |         |                    |                             |
| <i>XPC</i>    | SCLC      | rs2228001(p.Gln39Lys.Ex16+211A>C)              | C vs A          | 3                                            | 347/2108  | 0.84(0.71-1.00) | 0.046                  | 0          | 0.457   |                                               |                             |                 |                       |                |      |                                                |           |                    |                             |         |      |                |  |            |         |                    |                             |
| <i>XRCC1</i>  | SCLC      | rs1799782(p.Arg194Trp.c.580C>T.Ex6-22C>T)      | T vs C          | 3                                            | 289/1429  | 0.91(0.73-1.12) | 0.364                  | 0          | 0.519   |                                               |                             |                 |                       |                |      |                                                |           |                    |                             |         |      |                |  |            |         |                    |                             |
| <i>XRCC1</i>  | SCLC      | rs25487(p.Gln399Arg.c.1196A>G)                 | A vs G          | 5                                            | 470/2097  | 0.61(0.33-1.12) | 0.109                  | 91         | 0.000   | 4                                             | 259/1412                    | 0.43(0.12-1.56) | 0.197                 | 94             | 0.00 | 4                                              | 259/1412  | 0.60(0.29-1.24)    | 0.167                       | 42      | 0.16 |                |  |            |         |                    |                             |
| <i>ABC1</i>   | NSCLC     | rs1045642(p.IIle1145Ile.c.3435T>C)             | T vs C          | 3                                            | 312/331   | 1.48(0.57-3.82) | 0.421                  | 93         | 0.000   | 3                                             | 312/331                     | 1.29(0.43-3.86) | 0.651                 | 89             | 0.00 | 3                                              | 312/331   | 1.66(0.54-5.12)    | 0.38                        | 85.00   | 0.00 |                |  |            |         |                    |                             |
| <i>ACE</i>    | NSCLC     | 287-bp repeat (ID)                             | Ins vs del      | 3                                            | 450/603   | 0.97(0.72-1.32) | 0.859                  | 59         | 0.086   | 3                                             | 450/603                     | 0.97(0.74-1.27) | 0.823                 | 2              | 0.36 | 3                                              | 450/603   | 0.86(0.43-1.72)    | 0.66                        | 71.00   | 0.03 |                |  |            |         |                    |                             |
| <i>APEX1</i>  | NSCLC     | rs1760944(c.-468T>G.-141T>G)                   | A vs C          | 3                                            | 330/1017  | 1.07(0.81-1.41) | 0.636                  | 53         | 0.120   | 3                                             | 330/1017                    | 1.11(0.61-2.03) | 0.738                 | 73             | 0.02 | 3                                              | 330/1017  | 1.16(0.84-1.60)    | 0.37                        | 0.00    | 0.38 |                |  |            |         |                    |                             |
| <i>APEX1</i>  | NSCLC     | rs1130409(p.Asp148Glu.c.444T>G)                | G vs T          | 9                                            | 2902/3665 | 0.92(0.82-1.03) | 0.151                  | 57         | 0.018   | 9                                             | 1999/3100                   | 0.94(0.77-1.14) | 0.506                 | 58             | 0.01 | 8                                              | 1900/2980 | 0.85(0.69-1.05)    | 0.14                        | 44.50   | 0.08 |                |  |            |         |                    |                             |
| <i>BIRC5</i>  | NSCLC     | rs9904341(c.-31G>C)                            | C vs G          | 4                                            | 857/916   | 1.15(0.71-1.85) | 0.576                  | 89         | 0.000   | 4                                             | 857/916                     | 1.04(0.58-1.86) | 0.887                 | 83             | 0.00 | 4                                              | 857/916   | 1.60(0.88-2.93)    | 0.13                        | 76.10   | 0.01 |                |  |            |         |                    |                             |
| <i>CCND1</i>  | NSCLC     | rs9344(rs603965.p.Pro241Pro.c.723G>A.c.870G>A) | A vs G          | 3                                            | 724/1264  | 1.00(0.76-1.32) | 0.991                  | 73         | 0.026   | 3                                             | 724/1264                    | 0.94(0.59-1.52) | 0.815                 | 76             | 0.02 | 3                                              | 724/1264  | 1.04(0.69-1.56)    | 0.86                        | 64.60   | 0.06 |                |  |            |         |                    |                             |
| <i>CDKN1A</i> | NSCLC     | rs1801270(p.Ser31Arg.c.93C>A.6829C>A)          | A vs G          | 5                                            | 1163/2043 | 1.15(0.86-1.54) | 0.344                  | 50         | 0.090   | 5                                             | 1163/2043                   | 1.26(0.93-1.72) | 0.140                 | 42             | 0.14 | 4                                              | 1054/1948 | 0.71(0.44-1.15)    | 0.17                        | 0.00    | 0.97 |                |  |            |         |                    |                             |
| <i>CHRNA5</i> | NSCLC     | rs1696968(p.Asp398Asn.c.1192G>A)               | A vs G          | 6                                            | 3201/4736 | 1.36(1.24-1.48) | 1.48-10 <sup>-11</sup> | 13         | 0.329   | 4                                             | 2225/3577                   | 1.50(1.28-1.75) | 4.03-10 <sup>-7</sup> | 18             | 0.30 | 4                                              | 2225/3577 | 1.49(1.24-1.79)    | 1.71-10 <sup>-5</sup>       | 0.00    | 0.80 |                |  |            |         |                    |                             |
| <i>CLPM1L</i> | NSCLC     | rs402710(C>T)                                  | T vs C          | 6                                            | 2940/4040 | 0.85(0.79-0.91) | 1.13-10 <sup>-6</sup>  | 0          | 0.666   | 5                                             | 2257/3195                   | 0.84(0.72-0.97) | 0.018                 | 30             | 0.22 | 5                                              | 2257/3195 | 0.78(0.62-0.99)    | 0.04                        | 30.70   | 0.22 |                |  |            |         |                    |                             |
| <i>CTLA4</i>  | NSCLC     | rs5742909(g.319C>T.-318C>T)                    | T vs C          | 3                                            | 361/549   | 0.50(0.11-2.31) | 0.376                  | 95         | 0.000   | 3                                             | 361/549                     | 0.48(0.10-2.21) | 0.343                 | 94             | 0.00 | 3                                              | 361/549   | 0.58(0.04-8.50)    | 0.69                        | 77.90   | 0.01 |                |  |            |         |                    |                             |
| <i>CTLA4</i>  | NSCLC     | rs231773(p.Thr17Ala.c.49A>G)                   | G vs A          | 4                                            | 590/800   | 0.92(0.45-1.87) | 0.814                  | 94         | 0.000   | 4                                             | 590/800                     | 1.01(0.44-2.35) | 0.985                 | 92             | 0.00 | 4                                              | 590/800   | 0.92(0.36-2.37)    | 0.86                        | 87.60   | 0.00 |                |  |            |         |                    |                             |
| <i>CXCL12</i> | NSCLC     | rs1801157(801G>A)                              | A vs G          | 3                                            | 467/815   | 1.33(0.75-2.37) | 0.325                  | 89         | 0.000   | 3                                             | 467/815                     | 1.47(0.72-2.94) | 0.275                 | 86             | 0.00 | 3                                              | 467/815   | 1.43(0.56-3.65)    | 0.46                        | 81.60   | 0.00 |                |  |            |         |                    |                             |
| <i>CYP1A1</i> | NSCLC     | rs4646903(m.I.MspI.T3801C)                     | C vs T          | 24                                           | 3032/8165 | 1.11(1.03-1.21) | 0.009                  | 0          | 0.458   | 34                                            | 4465/6895                   | 1.17(1.06-1.30) | 0.003                 | 28             | 0.07 | 22                                             | 2789/4778 | 1.18(0.95-1.46)    | 0.14                        | 16.60   | 0.24 |                |  |            |         |                    |                             |
| <i>CYP1A1</i> | NSCLC     | rs1048943(*C2.m.p.IIe462Val.c.1384A>G)         | G vs A          | 22                                           | 4672/6125 | 1.10(0.92-1.32) | 0.284                  | 79         | 0.000   | 26                                            | 5123/6735                   | 1.11(0.90-1.36) | 0.322                 | 78             | 0.00 | 19                                             | 4264/5386 | 1.24(0.88-1.76)    | 0.23                        | 55.10   | 0.00 |                |  |            |         |                    |                             |
| <i>CYP1A2</i> | NSCLC     | rs2069526(-739T>G)                             | G vs T          | 3                                            | 495/537   | 1.73(0.79-3.80) | 0.173                  | 69         | 0.04    | 3                                             | 390/949                     | 1.30(0.62-2.73) | 0.481                 | 76             | 0.02 |                                                |           |                    |                             |         |      |                |  |            |         |                    |                             |
| <i>CYP1A2</i> | NSCLC     | rs35694136(-2467delT)                          | Del vs non-del  | 3                                            | 390/949   | 1.30(0.62-2.73) | 0.481                  | 76         | 0.02    |                                               |                             |                 |                       |                |      |                                                |           |                    |                             |         |      |                |  |            |         |                    |                             |
| <i>CYP1A2</i> | NSCLC     | rs2069514(CYP1A2*1C.-3860G>A)                  | A vs G          | 3                                            | 440/425   | 1.39(0.30-6.44) | 0.677                  | 92         | 0.00    |                                               |                             |                 |                       |                |      |                                                |           |                    |                             |         |      |                |  |            |         |                    |                             |
| <i>CYP1A2</i> | NSCLC     | rs762551(CYP1A2*1F.c.A-164C)                   | C vs A          | 3                                            | 636/691   | 0.88(0.58-1.34) | 0.550                  | 84         | 0.002   | 4                                             | 729/802                     | 0.78(0.48-1.29) | 0.334                 | 79             | 0.00 | 4                                              | 718/887   | 0.99(0.64-1.53)    | 0.95                        | 55.90   | 0.08 |                |  |            |         |                    |                             |
| <i>CYP1B1</i> | NSCLC     | rs1056836(CYP1B1*3.p.Leu432Val.c.1294C>G)      | G vs C          | 3                                            | 640/737   | 1.14(0.95-1.37) | 0.164                  | 0          | 0.695   | 3                                             | 640/737                     | 1.20(0.95-1.52) | 0.131                 | 0              | 0.64 | 3                                              | 640/737   | 1.10(0.74-1.62)    | 0.65                        | 0.00    | 0.92 |                |  |            |         |                    |                             |
| <i>CYP2A6</i> | NSCLC     | non*4/*4(*1/*4, a deletion of the CYP2A6 gene) | Del vs non-del  | 4                                            | 979/1432  | 1.07(0.67-1.69) | 0.784                  | 75         | 0.01    | 4                                             | 979/1432                    | 1.07(0.67-1.69) | 0.784                 | 75             | 0.01 |                                                |           |                    |                             |         |      |                |  |            |         |                    |                             |
| <i>CYP2C9</i> | NSCLC     | rs1799853(p.Arg144Cys.c.430C>T)                | T vs C          | 3                                            | 518/1096  | 1.06(0.54-2.07) | 0.871                  | 73         | 0.03    | 3                                             | 518/1096                    | 1.06(0.54-2.07) | 0.8                   |                |      |                                                |           |                    |                             |         |      |                |  |            |         |                    |                             |

| Genes    | Sub-group | Variants                                      | Comparison <sup>a</sup>      | Results of meta-analysis using allelic model |                |                 |                        |                    |                             |         | Results of meta-analysis using dominant model |                  |                       |                    |                             |         |                | Results of meta-analysis using recessive model |                        |                    |                             |  |  |  |
|----------|-----------|-----------------------------------------------|------------------------------|----------------------------------------------|----------------|-----------------|------------------------|--------------------|-----------------------------|---------|-----------------------------------------------|------------------|-----------------------|--------------------|-----------------------------|---------|----------------|------------------------------------------------|------------------------|--------------------|-----------------------------|--|--|--|
|          |           |                                               |                              | Studies                                      | Cases/Controls | OR(95% CI)      | P value                | I <sup>2</sup> (%) | P <sub>o</sub> <sup>b</sup> | Studies | Cases/Controls                                | OR(95% CI)       | P value               | I <sup>2</sup> (%) | P <sub>o</sub> <sup>b</sup> | Studies | Cases/Controls | OR(95% CI)                                     | P value                | I <sup>2</sup> (%) | P <sub>o</sub> <sup>b</sup> |  |  |  |
|          |           |                                               |                              |                                              |                |                 |                        |                    |                             |         |                                               |                  |                       |                    |                             |         |                |                                                |                        |                    |                             |  |  |  |
| MIR196A2 | NSCLC     | rs11614913(T>C)                               | C vs T                       | 5                                            | 1320/1762      | 1.02(0.85-1.22) | 0.869                  | 62                 | 0.032                       | 5       | 1320/1762                                     | 1.180(0.88-1.59) | 0.274                 | 54                 | 0.07                        | 5       | 1320/1762      | 0.91(0.69-1.19)                                | 0.47                   | 55.10              | 0.06                        |  |  |  |
| MMP1     | NSCLC     | rs1799750(-16071G/2G;insG)                    | 2G vs 1G                     | 3                                            | 485/688        | 0.97(0.75-1.26) | 0.832                  | 50                 | 0.134                       | 4       | 569/770                                       | 1.100(0.74-1.63) | 0.642                 | 45                 | 0.14                        | 3       | 485/688        | 0.94(0.63-1.41)                                | 0.77                   | 50.90              | 0.13                        |  |  |  |
| MMP2     | NSCLC     | rs243865(-1306C>T)                            | T vs C                       | 3                                            | 1216/1729      | 0.61(0.40-0.92) | 0.019                  | 83                 | 0.003                       | 3       | 1216/1729                                     | 0.57(0.36-0.92)  | 0.021                 | 83                 | 0.00                        | 3       | 1216/1729      | 0.54(0.30-0.99)                                | 0.05                   | 0.00               | 0.72                        |  |  |  |
| MPO      | NSCLC     | rs233227(G-463A)                              | A vs G                       | 10                                           | 5036/6646      | 1.06(0.95-1.18) | 0.294                  | 54                 | 0.020                       | 11      | 5124/6727                                     | 1.03(0.93-1.14)  | 0.633                 | 32                 | 0.14                        | 10      | 5036/6646      | 1.38(1.03-1.86)                                | 0.03                   | 51.20              | 0.03                        |  |  |  |
| MTHFR    | NSCLC     | rs1801131(p.Ala29Glu.c.1286A>C.A.1298C)       | C vs A                       | 4                                            | 785/1111       | 1.09(0.94-1.27) | 0.240                  | 0                  | 0.654                       | 4       | 785/1111                                      | 1.100(0.90-1.33) | 0.363                 | 0                  | 0.69                        | 4       | 785/1111       | 1.16(0.85-1.57)                                | 0.35                   | 0.00               | 0.59                        |  |  |  |
| MTHFR    | NSCLC     | rs1801133(p.Ala222Val,Ex4+79C>T)              | T vs C                       | 6                                            | 1273/1813      | 1.09(0.83-1.42) | 0.543                  | 78                 | 0.000                       | 6       | 1273/1813                                     | 1.07(0.72-1.59)  | 0.740                 | 78                 | 0.00                        | 6       | 1273/1813      | 1.23(0.84-1.79)                                | 0.29                   | 57.70              | 0.04                        |  |  |  |
| NAT2     | NSCLC     | Rapid/slow                                    | Slow vs rapid                | 11                                           | 2041/3282      | 0.94(0.75-1.17) | 0.572                  | 58                 | 0.008                       |         |                                               |                  |                       |                    |                             |         |                |                                                |                        |                    |                             |  |  |  |
| NQO1     | NSCLC     | rs1800566(p.Pro187Ser.c.648C>T.609C>T.*2)     | T vs C                       | 6                                            | 1511/2708      | 1.10(0.87-1.38) | 0.442                  | 74                 | 0.002                       | 8       | 1914/3400                                     | 1.08(0.91-1.28)  | 0.402                 | 41                 | 0.10                        | 6       | 1511/2708      | 1.13(0.72-1.77)                                | 0.60                   | 60.60              | 0.03                        |  |  |  |
| OGG1     | NSCLC     | rs1052133(p.Ser326Cys.c.977C>G.8055C>G)       | G vs C                       | 17                                           | 6874/7869      | 1.07(0.98-1.17) | 0.141                  | 60                 | 0.001                       | 17      | 5948/7259                                     | 1.08(0.95-1.24)  | 0.248                 | 54                 | 0.01                        | 17      | 6279/8214      | 1.16(1.02-1.32)                                | 0.02                   | 35.70              | 0.07                        |  |  |  |
| PADPRP   | NSCLC     | A/B(a 193-bp deletion)                        | Del vs non-del               |                                              |                |                 |                        |                    |                             | 4       | 258/339                                       | 1.22(0.78-1.90)  | 0.382                 | 35                 | 0.20                        |         |                |                                                |                        |                    |                             |  |  |  |
| PARP1    | NSCLC     | rs1136410(p.Val762Ala,Ex17+8T>C)              | C vs T                       | 3                                            | 1459/2095      | 1.09(0.89-1.33) | 0.408                  | 74                 | 0.022                       | 4       | 129/339                                       | 1.65(0.81-3.35)  | 0.165                 | 51                 | 0.10                        |         |                |                                                |                        |                    |                             |  |  |  |
| SOD2     | NSCLC     | rs4880(rs1799725.Ala16Val)                    | T vs C                       | 3                                            | 1459/2095      | 1.09(0.89-1.33) | 0.408                  | 74                 | 0.022                       | 4       | 129/339                                       | 1.65(0.81-3.35)  | 0.165                 | 51                 | 0.10                        |         |                |                                                |                        |                    |                             |  |  |  |
| TERT     | NSCLC     | rs2736098(p.Ala305Ala.c.915G>A)               | A vs G                       | 4                                            | 1214/2490      | 1.40(1.26-1.54) | 4.97x10 <sup>-11</sup> | 0                  | 0.891                       | 4       | 1214/2490                                     | 1.37(1.19-1.58)  | 1.78x10 <sup>-5</sup> | 0                  | 0.96                        | 4       | 1214/2490      | 1.89(1.57-2.28)                                | 2.10x10 <sup>-11</sup> | 0                  | 0.78                        |  |  |  |
| TNF      | NSCLC     | rs1800629(G-308A.*1*2)                        | A vs G                       | 5                                            | 484/1486       | 1.81(0.83-3.53) | 0.133                  | 90                 | 0.000                       | 5       | 484/1486                                      | 1.95(0.81-4.68)  | 0.135                 | 90                 | 0.00                        | 4       | 458/1460       | 2.71(0.99-7.43)                                | 0.054                  | 39                 | 0.18                        |  |  |  |
| TP53     | NSCLC     | rs1625895(IVS6+62G>A.A2>A1)                   | A vs G                       | 3                                            | 89/495         | 0.92(0.43-2.00) | 0.840                  | 63                 | 0.068                       | 3       | 89/495                                        | 0.90(0.31-2.58)  | 0.839                 | 71                 | 0.03                        | 3       | 89/495         | 1.69(0.22-13.20)                               | 0.619                  | 41                 | 0.18                        |  |  |  |
| TP53     | NSCLC     | rs1042522(p.Pro72Arg.c.215C>G)                | C vs G                       | 21                                           | 3367/8584      | 1.06(0.98-1.20) | 0.130                  | 54                 | 0.002                       | 22      | 3523/9166                                     | 1.06(0.93-1.22)  | 0.369                 | 51                 | 0.00                        | 22      | 3504/8822      | 1.20(1.05-1.38)                                | 0.008                  | 16                 | 0.25                        |  |  |  |
| TP63     | NSCLC     | rs10937405(C>T)                               | T vs C                       | 3                                            | 1158/8484      | 0.82(0.75-0.90) | 2.91x10 <sup>-5</sup>  | 0                  | 0.898                       | 3       | 1158/8484                                     | 0.79(0.69-0.90)  | 3.34x10 <sup>-4</sup> | 0                  | 0.69                        | 3       | 1158/8484      | 0.75(0.62-0.90)                                | 0.002                  | 0                  | 0.58                        |  |  |  |
| TP73     | NSCLC     | G4C14/A4T14                                   | AT vs GC                     | 3                                            | 1012/1210      | 0.90(0.70-1.15) | 0.382                  | 66                 | 0.032                       | 5       | 1946/2349                                     | 1.04(0.85-1.27)  | 0.735                 | 56                 | 0.06                        | 4       | 1012/1210      | 0.75(0.35-1.59)                                | 0.45                   | 77.20              | 0.00                        |  |  |  |
| TYMS     | NSCLC     | 28-bp tandem repeat                           | 2R vs Non-2R)                | 4                                            | 808/1326       | 0.89(0.75-1.04) | 0.142                  | 0                  | 0.391                       | 3       | 808/1326                                      | 0.84(0.69-1.01)  | 0.065                 | 0                  | 0.52                        | 3       | 808/1326       | 1.07(0.67-1.72)                                | 0.78                   | 0.00               | 0.53                        |  |  |  |
| VEGFA    | NSCLC     | rs2010963(634G>C)                             | C vs G                       | 4                                            | 2728/2372      | 1.10(0.93-1.29) | 0.264                  | 62                 | 0.047                       | 4       | 2728/2372                                     | 1.12(0.92-1.37)  | 0.267                 | 49                 | 0.12                        | 5       | 2828/2522      | 1.11(0.87-1.42)                                | 0.42                   | 45.40              | 0.12                        |  |  |  |
| VEGFA    | NSCLC     | rs833061(-460T>C)                             | C vs T                       | 4                                            | 2727/2372      | 1.00(0.92-1.08) | 0.987                  | 0                  | 0.847                       | 4       | 2727/2372                                     | 1.04(0.92-1.17)  | 0.519                 | 0                  | 0.62                        | 4       | 2727/2372      | 0.94(0.81-1.09)                                | 0.42                   | 0.00               | 0.54                        |  |  |  |
| VEGFA    | NSCLC     | rs3025039(CV9GT)                              | T vs C                       | 3                                            | 2403/2034      | 1.04(0.92-1.17) | 0.556                  | 0                  | 0.591                       | 5       | 2640/2356                                     | 1.04(0.91-1.18)  | 0.563                 | 0                  | 0.45                        | 3       | 2403/2034      | 1.12(0.73-1.71)                                | 0.60                   | 0.00               | 0.47                        |  |  |  |
| XPA      | NSCLC     | rs1800975(c.-4A>G.23G>A)                      | A vs G                       | 4                                            | 1637/1793      | 1.01(0.86-1.19) | 0.902                  | 63                 | 0.042                       | 5       | 1851/1978                                     | 0.99(0.79-1.23)  | 0.910                 | 60                 | 0.04                        | 5       | 1851/1978      | 1.11(0.87-1.41)                                | 0.40                   | 41.30              | 0.15                        |  |  |  |
| XPC      | NSCLC     | PAT-/-(2466G>A.2466delCTTAAc. inspoly(AT))    | Ins vs non-ins               | 3                                            | 967/1340       | 1.17(0.98-1.39) | 0.092                  | 55                 | 0.110                       | 3       | 967/1340                                      | 1.19(0.86-1.42)  | 0.455                 | 51                 | 0.13                        | 3       | 967/1340       | 1.46(1.17-1.81)                                | 0.00                   | 0.00               | 0.48                        |  |  |  |
| XPC      | NSCLC     | rs2228000(p.Ala499Val,Ex9-377C>T)             | T vs C                       | 3                                            | 1492/1630      | 1.04(0.93-1.16) | 0.514                  | 0                  | 0.567                       | 3       | 1492/1630                                     | 1.03(0.89-1.19)  | 0.678                 | 0                  | 0.72                        | 3       | 1492/1630      | 1.10(0.86-1.39)                                | 0.45                   | 0.00               | 0.40                        |  |  |  |
| XPC      | NSCLC     | rs2228001(p.Gln939Lys,Ex16+211A>C)            | C vs A                       | 4                                            | 2491/2316      | 1.05(0.96-1.14) | 0.303                  | 0                  | 0.744                       | 3       | 1489/1631                                     | 1.05(0.91-1.22)  | 0.481                 | 0                  | 0.39                        | 3       | 1489/1631      | 1.18(0.96-1.45)                                | 0.12                   | 0.00               | 0.69                        |  |  |  |
| XRCC1    | NSCLC     | rs2256507(G>A)                                | A vs G                       | 3                                            | 431/779        | 1.23(0.93-1.62) | 0.143                  | 50                 | 0.134                       | 3       | 431/779                                       | 1.20(0.89-1.63)  | 0.236                 | 34                 | 0.22                        | 3       | 431/779        | 1.68(1.03-2.74)                                | 0.04                   | 7.80               | 0.34                        |  |  |  |
| XRCC1    | NSCLC     | rs25486(A>G)                                  | G vs A                       | 3                                            | 373/795        | 1.06(0.69-1.61) | 0.795                  | 77                 | 0.013                       | 3       | 373/795                                       | 1.19(0.84-1.69)  | 0.334                 | 21                 | 0.28                        | 3       | 373/795        | 1.13(0.49-2.58)                                | 0.78                   | 77.60              | 0.01                        |  |  |  |
| XRCC1    | NSCLC     | rs1001581(c.145-216G>A)                       | T vs C                       | 4                                            | 574/994        | 1.27(1.04-1.56) | 0.018                  | 40                 | 0.172                       | 4       | 574/994                                       | 1.35(0.98-1.88)  | 0.069                 | 55                 | 0.08                        | 4       | 574/994        | 1.36(1.02-1.83)                                | 0.04                   | 0.00               | 0.71                        |  |  |  |
| XRCC1    | NSCLC     | rs3547(p.Gln632Gln.c.1896G>A)                 | A vs G                       | 3                                            | 374/794        | 1.06(0.85-1.32) | 0.592                  | 0                  | 0.850                       | 3       | 374/794                                       | 1.02(0.78-1.34)  | 0.868                 | 0                  | 0.99                        |         |                |                                                |                        |                    |                             |  |  |  |
| XRCC1    | NSCLC     | rs25489(p.Arg280His.c.839G>A.Ex9+16G>A)       | A vs G                       | 8                                            | 3183/3560      | 0.93(0.70-1.23) | 0.607                  | 74                 | 0.000                       | 7       | 3441/4871                                     | 0.94(0.69-1.28)  | 0.683                 | 78                 | 0.00                        | 6       | 2085/2779      | 0.87(0.45-1.71)                                | 0.69                   | 0.00               | 0.47                        |  |  |  |
| XRCC1    | NSCLC     | rs1799782(p.Arg194Tyr.c.580C>T.Ex6-22C>T)     | T vs C                       | 11                                           | 3418/4189      | 0.93(0.81-1.06) | 0.285                  | 40                 | 0.081                       | 10      | 3717/5540                                     | 0.92(0.81-1.05)  | 0.223                 | 19                 | 0.27                        | 9       | 2320/3408      | 1.15(0.90-1.47)                                | 0.25                   | 0.00               | 0.48                        |  |  |  |
| XRCC1    | NSCLC     | rs25487(p.Gln399Arg.c.1196A>G)                | A vs G                       | 19                                           | 7715/10261     | 1.04(0.96-1.14) | 0.330                  | 62                 | 0.000                       | 18      | 6716/9600                                     | 1.06(0.95-1.18)  | 0.284                 | 52                 | 0.01                        | 17      | 6617/9480      | 1.08(0.92-1.27)                                | 0.35                   | 47.60              | 0.02                        |  |  |  |
| XRCC1    | NSCLC     | rs3213245(-77T>C)                             | C vs T                       | 3                                            | 1744/2178      | 1.50(1.29-1.75) | 1.89x10 <sup>-7</sup>  | 0                  | 0.68                        |         |                                               |                  |                       |                    |                             |         |                |                                                |                        |                    |                             |  |  |  |
| XRCC3    | NSCLC     | rs861539(p.Thr241Met.c.722C>T)                | T vs C                       | 5                                            | 2287/2150      | 1.02(0.91-1.15) | 0.760                  | 0                  | 0.531                       | 4       | 1288/1489                                     | 0.90(0.75-1.08)  | 0.266                 | 0                  | 0.43                        | 3       | 1189/1369      | 1.12(0.75-1.68)                                | 0.57                   | 19.90              | 0.29                        |  |  |  |
| APEX1    | AD        | rs1130409(p.Asp148Glu.c.444T>G)               | G vs T                       | 5                                            | 1561/2309      | 0.96(0.81-1.14) | 0.637                  | 64                 | 0.026                       | 5       | 877/1744                                      | 0.97(0.69-1.36)  | 0.850                 | 70                 | 0.01                        | 4       | 809/1624       | 0.96(0.66-1.39)                                | 0.813                  | 58                 | 0.07                        |  |  |  |
| BIRC5    | AD        | rs9904341(c.-31G>C)                           | C vs G                       | 3                                            | 312/818        | 1.70(1.22-2.37) | 0.002                  | 57                 | 0.097                       | 3       | 312/818                                       | 1.86(1.09-3.18)  | 0.024                 | 50                 | 0.14                        | 3       | 312/818        | 2.07(1.38-3.10)                                | 4.41x10 <sup>-4</sup>  | 32                 | 0.23                        |  |  |  |
| CDKN1A   | AD        | rs1801270(p.Ser31Arg.c.93C>A.6829C>A)         | A vs C                       | 5                                            | 523/2043       | 1.18(0.86-1.62) | 0.306                  | 36                 | 0.180                       | 5       | 523/2043                                      | 1.32(0.99-1.77)  | 0.063                 | 7                  | 0.37                        | 4       | 465/1948       | 0.66(0.35-1.23)                                | 0.190                  | 0                  | 0.80                        |  |  |  |
| CHRNA5   | AD        | rs16969968(p.Asp398Asn.c.1192G>A)             | A vs G                       | 4                                            | 1507/2834      | 1.37(1.14-1.64) | 0.001                  | 33                 | 0.214                       |         |                                               |                  |                       |                    |                             |         |                |                                                |                        |                    |                             |  |  |  |
| CXCL12   | AD        | rs1801157(801G>A)                             | A vs G                       | 3                                            | 251/815        | 1.16(0.68-1.99) | 0.579                  | 74                 | 0.021                       | 3       | 251/815                                       | 1.29(0.76-2.19)  | 0.339                 | 55                 | 0.11                        | 3       | 251/815        | 1.16(0.37-3.60)                                | 0.802                  | 71                 | 0.03                        |  |  |  |
| CYP11A1  | AD        | rs4646903(m1.Msp1.T3801C)                     | C vs T                       | 17                                           | 1001/3991      | 0.95(0.83-1.08) | 0.417                  | 0                  | 0.543                       | 23      | 1496/4974                                     | 0.98(0.85-1.12)  | 0.735                 | 0                  | 0.86                        | 16      | 1012/3754      | 0.95(0.72-1.25)                                | 0.691                  | 0                  | 0.87                        |  |  |  |
| CYP11A1  | AD        | rs1048943(*2C.m2.p.Ile462Val.c.1384A>G)       | G vs A                       | 15                                           | 1225/4175      | 1.01(0.80-1.27) | 0.926                  | 63                 | 0.001                       | 18      | 1813/5085                                     | 1.06(0.81-1.39)  | 0.672                 | 68                 | 0.00                        | 11      | 1043/3146      | 1.26(0.75-2.11)                                | 0.385                  | 45                 | 0.05                        |  |  |  |
| CYP2A6   | AD        | non*4/*4(*1/*4,a deletion of the CYP2A6 gene) | Del vs non-del (*4 vs non*4) |                                              |                |                 |                        |                    |                             | 3       | 454/1300                                      | 1.07(0.80-1.45)  | 0.639                 | 0                  | 0.57                        |         |                |                                                |                        |                    |                             |  |  |  |
| CYP2D6   | AD        | phenotype(EM/HEM/PM)                          | PM vs EM                     | 5                                            | 234/1317       | 1.42(0.75-2.69) | 0.288                  | 0                  | 0.463                       | 5       | 234/1317                                      | 0.93(0.69-1.25)  | 0.624                 | 0                  | 0.95                        | 6       | 261/1367       | 1.20(0.59-2.44)                                | 0.613                  | 23                 | 0.26                        |  |  |  |
| CYP2E1   | AD        | rs6413432(c.967+143T>A.7632T>A)               | A vs T                       | 6                                            | 500/1809       | 0.79(0.66-0.95) | 0.011                  | 0                  | 0.664                       | 6       | 500/1809                                      | 0.85(0.63-1.16)  | 0.304                 | 26                 | 0.24                        | 5       | 481/1771       | 0.51(0.20-1.32)                                | 0.166                  | 37                 | 0.17                        |  |  |  |
| CYP2E1   | AD        | rs2031920(Rsa1c1c2c.-1053C>T)                 | T vs C                       | 8                                            | 1250/3903      | 0.87(0.67-1.04) | 0.109                  | 62                 | 0.011                       |         |                                               |                  |                       |                    |                             |         |                |                                                |                        |                    |                             |  |  |  |

| Genes          | Sub-group | Variants                                      | Comparison <sup>a</sup> | Results of meta-analysis using allelic model |                |                 |                       |                    |                             | Results of meta-analysis using dominant model |                |                 |                       |                    |                             | Results of meta-analysis using recessive model |                |                 |                       |                    |                             |
|----------------|-----------|-----------------------------------------------|-------------------------|----------------------------------------------|----------------|-----------------|-----------------------|--------------------|-----------------------------|-----------------------------------------------|----------------|-----------------|-----------------------|--------------------|-----------------------------|------------------------------------------------|----------------|-----------------|-----------------------|--------------------|-----------------------------|
|                |           |                                               |                         | Studies                                      | Cases/Controls | OR(95% CI)      | P value               | I <sup>2</sup> (%) | P <sub>o</sub> <sup>b</sup> | Studies                                       | Cases/Controls | OR(95% CI)      | P value               | I <sup>2</sup> (%) | P <sub>o</sub> <sup>b</sup> | Studies                                        | Cases/Controls | OR(95% CI)      | P value               | I <sup>2</sup> (%) | P <sub>o</sub> <sup>b</sup> |
|                |           |                                               |                         |                                              |                |                 |                       |                    |                             |                                               |                |                 |                       |                    |                             |                                                |                |                 |                       |                    |                             |
| <i>XPC</i>     | AD        | PAT-/- (24660_24664delGTAAC, inspoly(AT))     | Ins vs non-ins          | 3                                            | 398/1340       | 1.21(1.03-1.42) | 0.020                 | 0                  | 0.442                       | 3                                             | 398/1340       | 1.23(0.88-1.72) | 0.218                 | 47                 | 0.15                        | 3                                              | 398/1340       | 1.40(1.05-1.88) | 0.024                 | 0                  | 0.99                        |
| <i>XPC</i>     | AD        | rs2228001(p.Gln939Lys,Ex16+211A>C)            | C vs A                  | 3                                            | 1318/2108      | 1.06(0.96-1.17) | 0.273                 | 0                  | 0.577                       | 3                                             | 1318/2108      | 1.06(0.96-1.17) | 0.273                 | 0                  | 0.577                       | 3                                              | 1318/2108      | 1.06(0.96-1.17) | 0.273                 | 0                  | 0.577                       |
| <i>XRCC1</i>   | AD        | rs25489(p.Arg280His,c.839G>A,Ex9+16G>A)       | A vs G                  | 3                                            | 1067/1457      | 0.75(0.42-1.36) | 0.343                 | 83                 | 0.002                       | 3                                             | 795/2864       | 0.70(0.34-1.43) | 0.322                 | 86                 | 0.00                        | 3                                              | 795/2864       | 0.70(0.34-1.43) | 0.322                 | 86                 | 0.00                        |
| <i>XRCC1</i>   | AD        | rs1799782(p.Arg194Trp,c.580C>T,Ex6+22C>T)     | T vs C                  | 5                                            | 1142/1829      | 0.95(0.80-1.14) | 0.594                 | 23                 | 0.265                       | 5                                             | 880/3276       | 0.97(0.80-1.19) | 0.784                 | 0                  | 0.63                        | 4                                              | 390/1144       | 1.40(0.82-2.38) | 0.213                 | 0                  | 0.59                        |
| <i>XRCC1</i>   | AD        | rs25487(p.Gln399Arg,c.1196A>G)                | A vs G                  | 10                                           | 2359/6365      | 1.01(0.89-1.14) | 0.917                 | 58                 | 0.011                       | 10                                            | 1675/5800      | 1.04(0.88-1.24) | 0.642                 | 49                 | 0.04                        | 9                                              | 1607/5680      | 1.06(0.85-1.31) | 0.599                 | 22                 | 0.25                        |
| <i>XRCC1</i>   | AD        | rs3213245(-77T>C)                             | C vs T                  | 3                                            | 8620/2178      | 1.55(1.29-1.87) | 4.72×10 <sup>-6</sup> | 0                  | 0.76                        | 3                                             | 8620/2178      | 1.55(1.29-1.87) | 4.72×10 <sup>-6</sup> | 0                  | 0.76                        | 3                                              | 8620/2178      | 1.55(1.29-1.87) | 4.72×10 <sup>-6</sup> | 0                  | 0.76                        |
| <i>XRCC3</i>   | AD        | rs861539(p.Thr241Met,c.722C>T)                | T vs C                  | 3                                            | 1108/1578      | 1.07(0.89-1.28) | 0.494                 | 33                 | 0.227                       | 3                                             | 424/1013       | 0.87(0.65-1.18) | 0.377                 | 27                 | 0.26                        | 3                                              | 424/1013       | 0.87(0.65-1.18) | 0.377                 | 27                 | 0.26                        |
| <i>BIRC5</i>   | SCC       | rs9904341(c.-31G>C)                           | C vs G                  | 3                                            | 399/818        | 1.31(0.89-1.95) | 0.175                 | 73                 | 0.024                       | 3                                             | 399/818        | 1.03(0.78-1.35) | 0.850                 | 0                  | 0.43                        | 3                                              | 399/818        | 1.93(0.88-4.25) | 0.102                 | 82                 | 0.00                        |
| <i>CNDN1</i>   | SCC       | rs9344(rs603965p.Pro241Pro,c.723G>A,c.870G>A) | A vs G                  | 3                                            | 359/1264       | 1.05(0.70-1.57) | 0.825                 | 78                 | 0.010                       | 3                                             | 359/1264       | 0.96(0.55-1.69) | 0.899                 | 70                 | 0.04                        | 3                                              | 359/1264       | 1.11(0.58-2.10) | 0.758                 | 77                 | 0.01                        |
| <i>CDKN1A</i>  | SCC       | rs1801270(p.Ser31Arg,c.241P>A,6829C>A)        | A vs C                  | 5                                            | 597/2043       | 1.12(0.78-1.60) | 0.536                 | 46                 | 0.117                       | 5                                             | 597/2043       | 1.20(0.80-1.81) | 0.387                 | 45                 | 0.12                        | 4                                              | 546/1948       | 0.88(0.48-1.60) | 0.667                 | 0                  | 0.88                        |
| <i>CXCL12</i>  | SCC       | rs1801157(801G>A)                             | A vs G                  | 3                                            | 198/815        | 1.30(0.65-2.60) | 0.460                 | 88                 | 0.000                       | 3                                             | 198/815        | 1.40(0.59-3.30) | 0.444                 | 85                 | 0.00                        | 3                                              | 198/815        | 1.51(0.52-4.35) | 0.448                 | 76                 | 0.02                        |
| <i>CYP1A1</i>  | SCC       | rs4646903(m.L.Msp1L73801C)                    | C vs T                  | 17                                           | 1021/3959      | 1.45(1.26-1.67) | 3.77×10 <sup>-7</sup> | 21                 | 0.215                       | 24                                            | 1739/5212      | 1.51(1.27-1.79) | 3.13×10 <sup>-6</sup> | 39                 | 0.03                        | 16                                             | 976/3722       | 1.68(1.15-2.47) | 0.008                 | 34                 | 0.09                        |
| <i>CYP1A1</i>  | SCC       | rs1048943(*2C,m.p.Ile462Val,c.1384A>G)        | G vs A                  | 16                                           | 1572/3981      | 1.24(1.04-1.49) | 0.020                 | 58                 | 0.002                       | 20                                            | 2336/5091      | 1.23(0.98-1.56) | 0.078                 | 66                 | 0.00                        | 13                                             | 1365/3242      | 1.65(1.05-2.60) | 0.030                 | 53                 | 0.01                        |
| <i>CYP1A2</i>  | SCC       | rs35694136(-2467delT)                         | Del vs non-del          | 3                                            | 309/494        | 1.58(0.97-2.56) | 0.065                 | 39                 | 0.20                        | 3                                             | 309/494        | 1.58(0.97-2.56) | 0.065                 | 39                 | 0.20                        | 3                                              | 309/494        | 1.58(0.97-2.56) | 0.065                 | 39                 | 0.20                        |
| <i>CYP1A2</i>  | SCC       | rs2069514(CYP1A2*1C,-3860G>A)                 | A vs G                  | 3                                            | 292/411        | 1.13(0.39-3.27) | 0.818                 | 84                 | 0.00                        | 3                                             | 292/411        | 1.13(0.39-3.27) | 0.818                 | 84                 | 0.00                        | 3                                              | 292/411        | 1.13(0.39-3.27) | 0.818                 | 84                 | 0.00                        |
| <i>CYP1A2</i>  | SCC       | rs762551(CYP1A2*1F,c.A-164C)                  | C vs A                  | 3                                            | 291/409        | 0.61(0.32-1.16) | 0.132                 | 66                 | 0.06                        | 3                                             | 291/409        | 0.61(0.32-1.16) | 0.132                 | 66                 | 0.06                        | 3                                              | 305/494        | 1.05(0.53-2.10) | 0.884                 | 68                 | 0.04                        |
| <i>CYP2A6</i>  | SCC       | non/*4/*1/*8,a deletion of the CYP2A6 gene)   | Del vs non-del          | 4                                            | 516/1432       | 1.07(0.59-1.93) | 0.826                 | 79                 | 0.00                        | 4                                             | 516/1432       | 1.07(0.59-1.93) | 0.826                 | 79                 | 0.00                        | 4                                              | 516/1432       | 1.07(0.59-1.93) | 0.826                 | 79                 | 0.00                        |
| <i>CYP2D6</i>  | SCC       | phenotype (EM/HEM/PM)                         | PM vs EM                | 5                                            | 341/1153       | 0.63(0.30-1.31) | 0.216                 | 0                  | 0.500                       | 6                                             | 412/1229       | 1.04(0.81-1.34) | 0.765                 | 0                  | 0.43                        | 6                                              | 364/1203       | 0.57(0.29-1.14) | 0.111                 | 0                  | 0.53                        |
| <i>CYP2E1</i>  | SCC       | rs6413432(c.967+143T>A,7632T>A)               | A vs T                  | 6                                            | 715/1809       | 0.76(0.65-0.88) | 3.98×10 <sup>-4</sup> | 0                  | 0.911                       | 6                                             | 715/1809       | 0.77(0.64-0.92) | 0.005                 | 0                  | 0.89                        | 5                                              | 684/1771       | 0.52(0.34-0.82) | 0.004                 | 0                  | 0.47                        |
| <i>CYP2E1</i>  | SCC       | rs2031920(RsaI,c1>c2,-1053C>T)                | T vs C                  | 7                                            | 962/3722       | 0.93(0.82-1.06) | 0.287                 | 0                  | 0.661                       | 7                                             | 962/3722       | 0.94(0.80-1.10) | 0.414                 | 0                  | 0.55                        | 6                                              | 880/3016       | 1.09(0.53-2.22) | 0.818                 | 57                 | 0.04                        |
| <i>ERCC2</i>   | SCC       | rs1799793(p.Asp312Asn,c.981G>A)               | A vs G                  | 4                                            | 684/1704       | 1.00(0.57-1.77) | 0.999                 | 81                 | 0.001                       | 3                                             | 434/1019       | 1.20(0.69-2.07) | 0.525                 | 67                 | 0.05                        | 4                                              | 895/2039       | 4.62(0.7-30.53) | 0.112                 | 72                 | 0.01                        |
| <i>ERCC2</i>   | SCC       | rs13181(p.Lys751Gln,c.2251A>C)                | C vs A                  | 3                                            | 476/1171       | 1.19(0.72-1.98) | 0.496                 | 57                 | 0.098                       | 3                                             | 476/1171       | 1.19(0.72-1.98) | 0.496                 | 57                 | 0.098                       | 3                                              | 698/1523       | 1.84(0.65-5.23) | 0.250                 | 48                 | 0.14                        |
| <i>GSTM1</i>   | SCC       | Present/Null(Large gene deletion)             | Null vs present         | 42                                           | 4704/12325     | 1.23(1.08-1.40) | 0.002                 | 66                 | 0.000                       | 17                                            | 2502/6290      | 1.03(0.91-1.15) | 0.658                 | 23                 | 0.19                        | 12                                             | 1951/5051      | 1.14(0.92-1.41) | 0.233                 | 21                 | 0.24                        |
| <i>GSTP1</i>   | SCC       | rs1695(p.Ile105Val,c.313A>G)                  | G vs A                  | 12                                           | 1951/5051      | 1.01(0.93-1.09) | 0.899                 | 0                  | 0.550                       | 17                                            | 2502/6290      | 1.03(0.91-1.15) | 0.658                 | 23                 | 0.19                        | 12                                             | 1951/5051      | 1.14(0.92-1.41) | 0.233                 | 21                 | 0.24                        |
| <i>GSTT1</i>   | SCC       | Present/Null(Large gene deletion)             | Null vs present         | 23                                           | 2823/7727      | 1.07(0.93-1.24) | 0.354                 | 36                 | 0.047                       | 3                                             | 165/1187       | 1.56(0.81-3.00) | 0.183                 | 66                 | 0.05                        | 3                                              | 165/1187       | 1.30(0.75-2.28) | 0.350                 | 0                  | 0.81                        |
| <i>IL10</i>    | SCC       | rs1800871(c.-854T>C,-819C>T)                  | T vs C                  | 3                                            | 165/1187       | 1.37(0.89-2.11) | 0.149                 | 55                 | 0.106                       | 3                                             | 165/1187       | 1.56(0.81-3.00) | 0.183                 | 66                 | 0.05                        | 3                                              | 165/1187       | 1.30(0.75-2.28) | 0.350                 | 0                  | 0.81                        |
| <i>IL1B</i>    | SCC       | rs1143627(c.g-4970T>C,-31T>C)                 | C vs T                  | 3                                            | 527/2067       | 0.90(0.78-1.04) | 0.154                 | 0                  | 0.371                       | 3                                             | 527/2067       | 0.92(0.67-1.28) | 0.634                 | 43                 | 0.17                        | 3                                              | 527/2067       | 0.77(0.54-1.10) | 0.154                 | 38                 | 0.20                        |
| <i>IL1B</i>    | SCC       | rs16944(C-511T)                               | T vs C                  | 3                                            | 544/2091       | 1.03(0.90-1.19) | 0.663                 | 0                  | 0.583                       | 3                                             | 544/2091       | 1.15(0.87-1.52) | 0.311                 | 31                 | 0.23                        | 3                                              | 544/2091       | 0.97(0.76-1.23) | 0.770                 | 0                  | 0.40                        |
| <i>IL6</i>     | SCC       | rs1800795(G-174C)                             | C vs G                  | 4                                            | 297/689        | 1.41(0.76-2.60) | 0.277                 | 85                 | 0.000                       | 4                                             | 297/689        | 1.48(0.75-2.91) | 0.260                 | 76                 | 0.01                        | 4                                              | 297/689        | 1.53(0.60-3.90) | 0.373                 | 69                 | 0.02                        |
| <i>IL6</i>     | SCC       | rs1800796(-572C>G,634C>G)                     | G vs C                  | 3                                            | 1090/2541      | 1.05(0.79-1.38) | 0.742                 | 65                 | 0.056                       | 3                                             | 1090/2541      | 1.05(0.73-1.53) | 0.790                 | 51                 | 0.13                        | 4                                              | 186/1260       | 0.74(0.42-1.29) | 0.282                 | 0                  | 0.71                        |
| <i>IL8</i>     | SCC       | rs4073(T-251A)                                | T vs A                  | 3                                            | 186/1260       | 0.97(0.77-1.23) | 0.812                 | 0                  | 0.774                       | 4                                             | 186/1260       | 1.07(0.73-1.58) | 0.730                 | 24                 | 0.27                        | 7                                              | 1708/4408      | 1.15(0.94-1.39) | 0.169                 | 42                 | 0.11                        |
| <i>LTA</i>     | SCC       | rs2279744(SNP309,c.144+309T>G)                | G vs T                  | 7                                            | 1708/4408      | 1.11(0.94-1.30) | 0.229                 | 71                 | 0.002                       | 7                                             | 1708/4408      | 1.15(0.89-1.49) | 0.283                 | 70                 | 0.00                        | 3                                              | 796/1751       | 1.32(0.93-1.86) | 0.116                 | 50                 | 0.13                        |
| <i>MIR146A</i> | SCC       | rs2910164(C>G)                                | C vs G                  | 3                                            | 740/1729       | 0.56(0.37-0.84) | 0.005                 | 73                 | 0.023                       | 3                                             | 740/1729       | 0.51(0.33-0.79) | 0.002                 | 71                 | 0.03                        | 3                                              | 740/1729       | 0.51(0.24-1.11) | 0.089                 | 0                  | 0.50                        |
| <i>MMP2</i>    | SCC       | rs243865(-1306C>T)                            | T vs C                  | 3                                            | 1572/4855      | 0.98(0.83-1.15) | 0.791                 | 53                 | 0.061                       | 6                                             | 1572/4855      | 0.95(0.79-1.14) | 0.559                 | 49                 | 0.08                        | 6                                              | 1572/4855      | 1.17(0.81-1.70) | 0.396                 | 34                 | 0.18                        |
| <i>MPO</i>     | SCC       | rs233227(G-463A)                              | A vs G                  | 6                                            | 1572/4855      | 0.98(0.83-1.15) | 0.791                 | 53                 | 0.061                       | 6                                             | 1572/4855      | 0.95(0.79-1.14) | 0.559                 | 49                 | 0.08                        | 6                                              | 1572/4855      | 1.17(0.81-1.70) | 0.396                 | 34                 | 0.18                        |
| <i>NAT2</i>    | SCC       | Rapid/slow(Acetylation Phenotype)             | Slow vs rapid           | 10                                           | 1063/3136      | 0.94(0.72-1.24) | 0.677                 | 47                 | 0.049                       | 5                                             | 648/2490       | 1.16(0.96-1.39) | 0.127                 | 0                  | 0.82                        | 3                                              | 408/1798       | 1.19(0.65-2.20) | 0.578                 | 0                  | 0.94                        |
| <i>NOO1</i>    | SCC       | rs1800566(p.Pro187Ser,c.648C>T,609C>T,*2)     | T vs C                  | 3                                            | 408/1798       | 1.16(0.96-1.41) | 0.125                 | 0                  | 0.707                       | 5                                             | 648/2490       | 1.16(0.96-1.39) | 0.127                 | 0                  | 0.82                        | 3                                              | 408/1798       | 1.19(0.65-2.20) | 0.578                 | 0                  | 0.94                        |
| <i>OGG1</i>    | SCC       | rs1052133(p.Ser326Cys,c.977C>G,8055C>G)       | G vs C                  | 9                                            | 2108/5170      | 1.03(0.95-1.11) | 0.544                 | 0                  | 0.515                       | 8                                             | 1858/4485      | 1.02(0.87-1.19) | 0.843                 | 15                 | 0.31                        | 9                                              | 1949/5515      | 1.09(0.92-1.28) | 0.332                 | 0                  | 0.48                        |
| <i>PADPRP</i>  | SCC       | A/B(a 193-bp deletion)                        | Del vs non-del          | 4                                            | 103/339        | 0.87(0.53-1.41) | 0.561                 | 0                  | 0.47                        | 4                                             | 103/339        | 0.87(0.53-1.41) | 0.561                 | 0                  | 0.47                        | 4                                              | 103/339        | 0.87(0.53-1.41) | 0.561                 | 0                  | 0.47                        |
| <i>PTGS2</i>   | SCC       | rs5275(c.*427T>C,8473T>C)                     | C vs T                  | 3                                            | 540/1105       | 0.91(0.74-1.13) | 0.401                 | 0                  | 0.56                        | 3                                             | 540/1105       | 0.91(0.74-1.13) | 0.401                 | 0                  | 0.56                        | 3                                              | 540/1105       | 0.91(0.74-1.13) | 0.401                 | 0                  | 0.56                        |
| <i>SOD2</i>    | SCC       | rs4880(rs1799725,Ala16Val)                    | T vs C                  | 4                                            | 574/2761       | 1.54(1.03-2.31) | 0.035                 | 83                 | 0.001                       | 4                                             | 574/2761       | 1.44(1.13-1.84) | 0.003                 | 3                  | 0.38                        | 5                                              | 657/3093       | 1.50(0.89-2.52) | 0.128                 | 80                 | 0.00                        |
| <i>TERT</i>    | SCC       | rs2736098(p.Ala305Ala,c.915G>A)               | A vs G                  | 4                                            | 788/2490       | 1.14(1.01-1.29) | 0.031                 | 0                  | 0.597                       | 4                                             | 788/2490       | 1.12(0.95-1.33) | 0.179                 | 0                  | 0.76                        | 4                                              | 788/2490       | 1.33(1.05-1.69) | 0.019                 | 0                  | 0.61                        |
| <i>TNF</i>     | SCC       | rs1800629(G-308A,*1/*2)                       | A vs G                  | 5                                            | 273/1500       | 1.85(1.17-2.93) | 0.009                 | 66                 | 0.019                       | 5                                             | 273/1500       | 1.98(1.24-3.16) | 0.004                 | 57                 | 0.06                        | 5                                              | 273/1500       | 2.38(0.82-6.91) | 0.112                 | 22                 | 0.28                        |
| <i>TP53</i>    | SCC       | rs1042522(p.Pro72Arg,c.215C>G)                | C vs G                  | 21                                           | 3135/8809      | 0.99(0.84-1.17) | 0.941                 | 84                 | 0.000                       | 22                                            | 33             |                 |                       |                    |                             |                                                |                |                 |                       |                    |                             |

**Supplementary Table S6. Credibility assessment for variants with significant associations with lung cancer risk in subgroup meta-analyses by histological types**

| Genes          | Sub-group | Variants     | Alleles <sup>a</sup> | Number evaluated | Lung cancer risk meta-analysis |                 |                         |                        |                    | Venice criteria grades <sup>d</sup> | Credibility of evidence <sup>e</sup> | Amount of evidence <sup>f</sup> |         | Replication <sup>g</sup> | Protection from bias <sup>h</sup> |                                                 | Sensitivity analysis <sup>i</sup> |                         | Low OR <sup>j</sup>   | Modified P <sup>k</sup> | Excess P <sup>l</sup> | Begg's P <sup>m</sup> |                    |       |
|----------------|-----------|--------------|----------------------|------------------|--------------------------------|-----------------|-------------------------|------------------------|--------------------|-------------------------------------|--------------------------------------|---------------------------------|---------|--------------------------|-----------------------------------|-------------------------------------------------|-----------------------------------|-------------------------|-----------------------|-------------------------|-----------------------|-----------------------|--------------------|-------|
|                |           |              |                      |                  | Genetic models                 |                 | OR(95% CI) <sup>b</sup> | P value                | I <sup>2</sup> (%) |                                     |                                      | P <sub>o</sub> <sup>c</sup>     | Numbers |                          | Grade                             | Grade                                           | Reasons for bias                  | Initial study influence |                       |                         |                       |                       | Deviation from HWE |       |
|                |           |              |                      |                  | Studies                        | Cases/Controls  |                         |                        |                    |                                     |                                      |                                 |         |                          |                                   |                                                 |                                   | OR(95%CI)               |                       |                         |                       |                       | P value            |       |
| <i>CHRNA5</i>  | SCLC      | rs16969968   | A/G                  | 3                | 513/3253                       | Allelic         | 1.55(1.15-2.10)         | 0.004                  | 55                 | 0.109                               | ACC                                  | Weak                            | 1813    | A                        | C                                 | Small study                                     | 1.37(1.12-1.67)                   | 0.002                   | None                  | No                      | 0.001                 | 0.558                 | 0.296              |       |
| <i>CYP1A1</i>  | SCLC      | rs4646903    | C/T                  | 12               | 273/2545                       | Recessive       | 1.71(1.08-2.71)         | 0.021                  | 0                  | 0.904                               | BAA                                  | Moderate                        | 176     | B                        | A                                 |                                                 | 1.69(1.06-2.68)                   | 0.026                   | NO                    | No                      | 0.523                 | 1.000                 | 0.244              |       |
| <i>GSTM1</i>   | SCLC      | Present/Null | NA                   | 26               | 1224/7255                      | Null vs present | 1.30(1.09-1.56)         | 0.004                  | 43                 | 0.01                                | ABA                                  | Moderate                        | 4063    | A                        | B                                 |                                                 | 1.28(1.06-1.54)                   | 0.01                    | None                  | No                      | 0.976                 | 0.311                 | 1.000              |       |
| <i>NGO1</i>    | SCLC      | rs1800566    | T/C                  | 3                | 205/792                        | Allelic         | 1.68(1.05-2.68)         | 0.029                  | 56                 | 0.102                               | BCC                                  | Weak                            | 342     | B                        | C                                 | First study                                     | 1.44(0.95-2.17)                   | 0.085                   | None                  | No                      | 0.259                 | 0.613                 | 0.296              |       |
| <i>XPC</i>     | SCLC      | rs2228001    | C/A                  | 3                | 347/2108                       | Allelic         | 0.84(0.71-1.00)         | 0.046                  | 0                  | 0.457                               | AAC                                  | Weak                            | 1843    | A                        | C                                 | First study                                     | 0.88(0.72-1.07)                   | 0.192                   | None                  | No                      | 0.218                 | 1.000                 | 1.000              |       |
| <i>CHRNA5</i>  | NSCLC     | rs16969968   | A/G                  | 6                | 3201/4736                      | Allelic         | 1.36(1.24-1.48)         | 1.48x10 <sup>-11</sup> | 13                 | 0.329                               | AAA                                  | Strong                          | 4303    | A                        | A                                 |                                                 | 1.34(1.23-1.45)                   | 2.90x10 <sup>-12</sup>  | None                  | No                      | 0.736                 | 0.672                 | 0.707              |       |
| <i>CLPTM1L</i> | NSCLC     | rs402710     | T/C                  | 6                | 2940/4040                      | Allelic         | 0.85(0.79-0.91)         | 1.13x10 <sup>-5</sup>  | 0                  | 0.666                               | AAA                                  | Strong                          | 4634    | A                        | A                                 |                                                 | 0.81(0.74-0.89)                   | 7.73x10 <sup>-6</sup>   | None                  | No                      | 0.650                 | 1.000                 | 1.000              |       |
| <i>CYP1A1</i>  | NSCLC     | rs4646903    | C/T                  | 24               | 3032/5165                      | Allelic         | 1.11(1.03-1.21)         | 0.009                  | 0                  | 0.458                               | AAC                                  | Weak                            | 3650    | A                        | A                                 | Low OR                                          | 1.09(1.01-1.19)                   | 0.038                   | NO                    | Yes                     | 0.986                 | 0.194                 | 0.785              |       |
| <i>CYP2E1</i>  | NSCLC     | rs6413432    | A/T                  | 6                | 1290/1809                      | Allelic         | 0.80(0.71-0.91)         | 4.90x10 <sup>-4</sup>  | 0                  | 0.868                               | AAA                                  | Strong                          | 1372    | A                        | A                                 |                                                 | 0.81(0.71-0.92)                   | 0.001                   | NO                    | No                      | 0.880                 | 1.000                 | 1.000              |       |
| <i>ERCC1</i>   | NSCLC     | rs11615      | C/T                  | 3                | 780/811                        | Allelic         | 0.68(0.58-0.81)         | 1.01x10 <sup>-5</sup>  | 13                 | 0.316                               | AAA                                  | Strong                          | 2162    | A                        | A                                 |                                                 | 0.75(0.61-0.91)                   | 0.004                   | None                  | No                      | 0.311                 | 0.547                 | 0.296              |       |
| <i>ERCC2</i>   | NSCLC     | rs13181      | C/A                  | 8                | 2770/2856                      | Allelic         | 1.19(1.04-1.36)         | 0.014                  | 39                 | 0.116                               | ABC                                  | Weak                            | 2381    | A                        | B                                 | HWE                                             | 1.22(1.06-1.40)                   | 0.006                   | Yes                   | No                      | 0.776                 | 0.665                 | 1.000              |       |
| <i>FAS</i>     | NSCLC     | rs2234767    | A/G                  | 3                | 3194/3064                      | Recessive       | 1.51(1.23-1.87)         | 1.26x10 <sup>-4</sup>  | 0                  | 0.447                               | BAC                                  | Weak                            | 396     | B                        | A                                 | First study                                     | 1.38(0.95-2.00)                   | 0.093                   | None                  | No                      | 0.478                 | 1.000                 | 0.296              |       |
| <i>FGFR4</i>   | NSCLC     | rs351855     | A/G                  | 3                | 985/1230                       | Allelic         | 0.76(0.68-0.86)         | 1.97x10 <sup>-5</sup>  | 0                  | 0.549                               | AAA                                  | Strong                          | 1779    | A                        | A                                 |                                                 | 0.74(0.64-0.86)                   | 5.19x10 <sup>-5</sup>   | None                  | No                      | 0.323                 | 0.590                 | 1.000              |       |
| <i>GSTM1</i>   | NSCLC     | Present/Null | NA                   | 60               | 11551/15673                    | Null vs present | 1.18(1.08-1.29)         | 1.56x10 <sup>-4</sup>  | 62                 | 0                                   | ACA                                  | Weak                            | 13759   | A                        | C                                 | A                                               |                                   | 1.17(1.08-1.28)         | 3.23x10 <sup>-4</sup> | None                    | No                    | 0.119                 | 0.213              | 0.448 |
| <i>HYKK</i>    | NSCLC     | rs931794     | G/A                  | 4                | 1548/2464                      | Allelic         | 1.25(1.13-1.37)         | 9.08x10 <sup>-6</sup>  | 0                  | 0.888                               | AAA                                  | Strong                          | 2718    | A                        | A                                 |                                                 | 1.25(1.07-1.46)                   | 0.004                   | None                  | No                      | 0.902                 | 0.630                 | 0.734              |       |
| <i>IL17A</i>   | NSCLC     | rs2275913    | A/G                  | 3                | 780/998                        | Recessive       | 1.72(1.12-2.65)         | 0.013                  | 31                 | 0.235                               | BBB                                  | Moderate                        | 164     | B                        | B                                 | Missing information                             | 2.01(1.40-2.87)                   | 1.41x10 <sup>-3</sup>   | NA                    | No                      | 0.405                 | 0.566                 | 0.296              |       |
| <i>IL1B</i>    | NSCLC     | rs1143627    | C/T                  | 5                | 1915/2551                      | Allelic         | 0.82(0.67-0.99)         | 0.043                  | 78                 | 0.001                               | ACC                                  | Weak                            | 4019    | A                        | C                                 | First study, HWE, small study, publication bias | 0.83(0.66-1.05)                   | 0.117                   | Yes                   | No                      | 0.019                 | 0.676                 | 0.027              |       |
| <i>IL6</i>     | NSCLC     | rs1800796    | G/C                  | 3                | 1333/1452                      | Allelic         | 0.75(0.57-0.99)         | 0.039                  | 77                 | 0.013                               | ACC                                  | Weak                            | 1473    | A                        | C                                 | Small study                                     | 0.75(0.57-0.99)                   | 0.039                   | None                  | No                      | 0.036                 | 0.227                 | 0.296              |       |
| <i>MIR146A</i> | NSCLC     | rs2910164    | C/G                  | 4                | 880/1094                       | Allelic         | 1.28(1.11-1.46)         | 4.63x10 <sup>-4</sup>  | 0                  | 0.391                               | AAA                                  | Strong                          | 1765    | A                        | A                                 |                                                 | 1.28(1.11-1.46)                   | 4.63x10 <sup>-4</sup>   | None                  | No                      | 0.327                 | 0.629                 | 0.734              |       |
| <i>MMP2</i>    | NSCLC     | rs243865     | T/C                  | 3                | 1216/1729                      | Allelic         | 0.61(0.40-0.92)         | 0.019                  | 83                 | 0.003                               | BCC                                  | Weak                            | 829     | B                        | C                                 | First study, small study                        | 0.72(0.33-1.59)                   | 0.419                   | None                  | No                      | 0.025                 | 0.456                 | 0.296              |       |
| <i>MPO</i>     | NSCLC     | rs233227     | A/G                  | 10               | 5036/6646                      | Recessive       | 1.38(1.03-1.86)         | 0.033                  | 51                 | 0.031                               | BCA                                  | Weak                            | 576     | B                        | C                                 | A                                               |                                   | 1.41(1.03-1.94)         | 0.035                 | None                    | No                    | 0.881                 | 0.700              | 0.858 |
| <i>OGG1</i>    | NSCLC     | rs1052133    | G/C                  | 17               | 6279/8214                      | Recessive       | 1.16(1.02-1.32)         | 0.02                   | 36                 | 0.072                               | ABC                                  | Weak                            | 2814    | A                        | C                                 | Excess of significant studies                   | 1.15(1.01-1.32)                   | 0.039                   | NO                    | No                      | 0.920                 | 0.884                 | 0.967              |       |
| <i>SOD2</i>    | NSCLC     | rs4880       | T/C                  | 6                | 3133/4255                      | Allelic         | 1.25(1.08-1.45)         | 0.002                  | 72                 | 0.003                               | ACC                                  | Weak                            | 7713    | A                        | C                                 | Small study                                     | 1.31(1.07-1.60)                   | 0.008                   | NO                    | No                      | 0.090                 | 1.000                 | 0.133              |       |
| <i>TERT</i>    | NSCLC     | rs2736098    | A/G                  | 4                | 2002/2490                      | Allelic         | 1.30(1.19-1.42)         | 2.59x10 <sup>-9</sup>  | 0                  | 0.818                               | AAA                                  | Strong                          | 3368    | A                        | A                                 |                                                 | 1.29(1.17-1.42)                   | 2.09x10 <sup>-5</sup>   | None                  | No                      | 0.775                 | 1.000                 | 0.734              |       |
| <i>TNF</i>     | NSCLC     | rs1800629    | A/G                  | 6                | 1052/1767                      | Allelic         | 1.67(1.01-2.76)         | 0.044                  | 89                 | 0                                   | BCC                                  | Weak                            | 829     | B                        | C                                 | First study                                     | 1.82(0.91-3.65)                   | 0.091                   | None                  | No                      | 0.432                 | 2.009                 | 0.452              |       |
| <i>TP63</i>    | NSCLC     | rs10937405   | T/C                  | 3                | 3587/8484                      | Allelic         | 0.87(0.82-0.92)         | 9.91x10 <sup>-7</sup>  | 0                  | 0.595                               | AAB                                  | Moderate                        | 10101   | A                        | B                                 | Missing information                             | NA                                |                         | None                  | No                      | 0.402                 | 1.000                 | 1.000              |       |
| <i>XPC</i>     | NSCLC     | PAT+/-       | Ins/non-ins          | 3                | 9671/1340                      | Recessive       | 1.46(1.17-1.81)         | 0.001                  | 0                  | 0.483                               | BAA                                  | Moderate                        | 383     | B                        | A                                 |                                                 | 1.36(1.05-1.76)                   | 0.020                   | None                  | No                      | 0.888                 | 0.591                 | 1.000              |       |
| <i>XRCC1</i>   | NSCLC     | rs2256507    | A/G                  | 3                | 431/779                        | Recessive       | 1.68(1.03-2.74)         | 0.038                  | 8                  | 0.338                               | CAB                                  | Weak                            | 80      | C                        | A                                 | Missing information                             | NA                                |                         | None                  | No                      | 0.281                 | 0.499                 | 1.000              |       |
| <i>XRCC1</i>   | NSCLC     | rs1001581    | T/C                  | 4                | 574/994                        | Allelic         | 1.27(1.04-1.56)         | 0.018                  | 40                 | 0.172                               | ABC                                  | Weak                            | 1134    | A                        | B                                 | First study                                     | 1.28(0.87-1.89)                   | 0.218                   | None                  | No                      | 0.187                 | 0.592                 | 0.734              |       |
| <i>XRCC1</i>   | NSCLC     | rs3213245    | C/T                  | 3                | 1744/2178                      | Dominant        | 1.50(1.29-1.75)         | 1.89x10 <sup>-7</sup>  | 0                  | 0.683                               | BAA                                  | Moderate                        | 847     | B                        | A                                 |                                                 | 1.53(1.26-1.84)                   | 1.14x10 <sup>-5</sup>   | None                  | No                      | 0.228                 | 0.575                 | 0.296              |       |
| <i>BIRC5</i>   | AD        | rs9904341    | C/G                  | 3                | 312/818                        | Allelic         | 1.70(1.22-2.37)         | 0.002                  | 57                 | 0.097                               | ACA                                  | Weak                            | 1142    | A                        | C                                 | A                                               |                                   | 2.03(1.46-2.83)         | 2.33x10 <sup>-5</sup> | None                    | No                    | 0.189                 | 0.562              | 0.296 |
| <i>CHRNA5</i>  | AD        | rs16969968   | A/G                  | 4                | 1507/2834                      | Allelic         | 1.37(1.14-1.64)         | 0.001                  | 33                 | 0.214                               | ABA                                  | Moderate                        | 1867    | A                        | B                                 | A                                               |                                   | 1.32(1.16-1.51)         | 3.06x10 <sup>-5</sup> | None                    | No                    | 0.861                 | 1.000              | 0.734 |
| <i>CYP2E1</i>  | AD        | rs6413432    | A/T                  | 6                | 500/1809                       | Allelic         | 0.79(0.66-0.95)         | 0.011                  | 0                  | 0.664                               | AAA                                  | Strong                          | 1040    | A                        | A                                 |                                                 | 0.80(0.67-0.97)                   | 0.019                   | NO                    | No                      | 0.882                 | 1.000                 | 0.707              |       |
| <i>ERCC2</i>   | AD        | rs13181      | C/A                  | 4                | 664/1230                       | Dominant        | 1.35(1.06-1.70)         | 0.013                  | 0                  | 0.635                               | BAA                                  | Moderate                        | 607     | B                        | A                                 |                                                 | 1.39(1.08-1.80)                   | 0.010                   | None                  | No                      | 0.489                 | 1.000                 | 0.734              |       |
| <i>GSTM1</i>   | AD        | Present/Null | NA                   | 42               | 4199/12206                     | Null vs present | 1.17(1.05-1.31)         | 0.005                  | 45                 | 0.001                               | ABC                                  | Weak                            | 8165    | A                        | B                                 | Small study, excess of significant studies      | 1.14(1.03-1.26)                   | 0.011                   | None                  | No                      | 0.075                 | 0.039                 | 0.146              |       |
| <i>IL17A</i>   | AD        | rs2275913    | A/G                  | 3                | 469/998                        | Recessive       | 1.84(1.11-3.06)         | 0.018                  | 36                 | 0.211                               | BBB                                  | Moderate                        | 132     | B                        | B                                 | Missing information                             | 2.19(1.47-3.26)                   | 1.21x10 <sup>-4</sup>   | NA                    | No                      | 0.570                 | 0.567                 | 1.000              |       |
| <i>MDM2</i>    | AD        | rs2279744    | G/T                  | 6                | 1714/4083                      | Recessive       | 1.28(1.04-1.56)         | 0.018                  | 46                 | 0.098                               | ABA                                  | Moderate                        | 1296    | A                        | B                                 | A                                               |                                   | 1.34(1.06-1.70)         | 0.015                 | None                    | No                    | 0.792                 | 0.668              | 0.707 |
| <i>MIR146A</i> | AD        | rs2910164    | C/G                  | 3                | 442/965                        | Allelic         | 1.26(1.04-1.51)         | 0.018                  | 15                 | 0.309                               | AAC                                  | Weak                            | 1311    | A                        | A                                 | First study                                     | 1.33(0.89-1.99)                   | 0.161                   | None                  | No                      | 0.202                 | 1.000                 | 0.296              |       |
| <i>OGG1</i>    | AD        | rs1052133    | G/C                  | 12               | 3603/6677                      | Recessive       | 1.25(1.10-1.43)         | 0.001                  | 20                 | 0.246                               | AAA                                  | Strong                          | 2238    | A                        | A                                 |                                                 | 1.25(1.09-1.44)                   | 0.002                   | None                  | No                      | 0.777                 | 0.263                 | 0.945              |       |
| <i>SOD2</i>    | AD        | rs4880       | T/C                  | 4                | 1219/2761                      | Allelic         | 1.20(1.08-1.32)         | 3.80x10 <sup>-4</sup>  | 0                  | 0.405                               | AAC                                  | Weak                            | 4235    | A                        | A                                 | First study                                     | 1.28(0.98-1.68)                   | 0.075                   | NO                    | No                      | 0.104                 | 0.150                 | 0.308              |       |
| <i>TERT</i>    | AD        | rs2736098    | A/G                  | 4                | 1214/2490                      | Allelic         | 1.40(1.26-1.54)         | 4.97x10 <sup>-11</sup> | 0                  | 0.891                               | AAA                                  | Strong                          | 2771    | A                        | A                                 |                                                 | 1.39(1.24-1.55)                   | 2.68x10 <sup>-8</sup>   | None                  | No                      | 0.533                 | 1.000                 | 0.308              |       |
| <i>TP53</i>    | AD        | rs1042522    | C/G                  | 22               | 3504/8822                      | Recessive       | 1.20(1.05-1.38)         | 0.008                  | 16                 | 0.245                               | AAA                                  | Strong                          | 1835    | A                        | A                                 |                                                 | 1.20(1.04-1.39)                   | 0.015                   | NO                    | No                      | 0.210                 | 1.000                 | 0.143              |       |
| <i>TP63</i>    | AD        | rs10937405   | T/C                  | 3                | 1158/8484                      | Allelic         | 0.82(0.75-0.90)         | 2.91x10 <sup>-5</sup>  | 0                  | 0.898                               | AAB                                  | Moderate                        | 8115    | A                        | B                                 | Missing information                             | NA                                |                         | None                  | No                      | 0.168                 | 1.000                 | 0.296              |       |
| <i>XPC</i>     | AD        | PAT+/-       | Ins/non-ins          | 3                | 398/1340                       | Allelic         | 1.21(1.03-1.42)         | 0.02                   | 0                  | 0.442                               | AAC                                  | Weak                            | 1391    | A                        | A                                 | First study                                     | 1.18(0.94-1.47)                   | 0.149                   | None                  | No                      | 0.999                 | 0.575                 | 1.000              |       |
| <i>XRCC1</i>   | AD        | rs3213245    | C/T                  | 3                | 860/2178                       | Dominant        | 1.55(1.29-1.87)         | 4.72x10 <sup>-6</sup>  | 0                  | 0.758                               | BAA                                  | Moderate                        | 630     | B                        | A                                 |                                                 | 1.58(1.25-2.00)                   | 1.25x10 <sup>-4</sup>   | None                  | No                      | 0.192                 | 0.557                 | 0.296              |       |
| <i>CYP1A1</i>  | SCC       | rs4646903    | C/T                  | 17               | 1021/3959                      | Allelic         | 1.45(1.26-1.67)         | 3.77x10 <sup>-7</sup>  | 21                 | 0.215                               | AAA                                  | Strong                          | 2102    | A                        | A                                 |                                                 | 1.42(1.22-1.65)                   | 6.56x10 <sup>-6</sup>   | NO                    | No                      | 0.571                 | 0.415                 | 0.232              |       |
| <i>CYP1A1</i>  | SCC       | rs1048943    | G/A                  | 16               | 1572/3981                      | Allelic         | 1.24(1.04-1.49)         | 0.02                   | 58                 | 0.002                               | ACC                                  | Weak                            | 2328    | A                        | C                                 | Small study                                     | 1.23(1.01-1.49)                   | 0.038                   |                       |                         |                       |                       |                    |       |

Supplementary Table S7. Subgroup meta-analyses stratified by smoking status for variants with sufficient data under different genetic models (Continued on next page)

| Genes  | Sub-group | Variants                                     | Comparison <sup>a</sup> | Results of meta-analysis using allelic model |                |                        |                        |                    | Results of meta-analysis using dominant model |         |                |                 |                       | Results of meta-analysis using recessive model |                             |         |                |                 |                       |                    |                             |  |
|--------|-----------|----------------------------------------------|-------------------------|----------------------------------------------|----------------|------------------------|------------------------|--------------------|-----------------------------------------------|---------|----------------|-----------------|-----------------------|------------------------------------------------|-----------------------------|---------|----------------|-----------------|-----------------------|--------------------|-----------------------------|--|
|        |           |                                              |                         | Studies                                      | Cases/Controls | OR(95% CI)             | P value                | I <sup>2</sup> (%) | P <sub>0</sub> <sup>b</sup>                   | Studies | Cases/Controls | OR(95% CI)      | P value               | I <sup>2</sup> (%)                             | P <sub>0</sub> <sup>b</sup> | Studies | Cases/Controls | OR(95% CI)      | P value               | I <sup>2</sup> (%) | P <sub>0</sub> <sup>b</sup> |  |
| APEX1  | Smokers   | rs1760944(c.-468T>G,-141T>G)                 | A vs C                  | 3                                            | 655/647        | 1.37(1.11-1.69)        | 0.003                  | 43                 | 0.174                                         |         |                |                 |                       |                                                |                             |         |                |                 |                       |                    |                             |  |
| APEX1  | Smokers   | rs11304093(p.Asp148Glu.c.444T>G)             | G vs T                  | 7                                            | 1604/1983      | 0.97(0.86-1.10)        | 0.678                  | 39                 | 0.133                                         |         |                |                 |                       |                                                |                             |         |                |                 |                       |                    |                             |  |
| CCND1  | Smokers   | rs9344(rs603965.p.Pro241Pro.c.870G>A)        | A vs G                  | 4                                            | 1250/1709      | 1.14(0.86-1.53)        | 0.368                  | 82                 | 0.001                                         | 4       | 1250/1709      | 1.17(0.74-1.86) | 0.511                 | 78                                             | 0.004                       | 4       | 1250/1709      | 1.21(0.78-1.86) | 0.393                 | 81                 | 0.002                       |  |
| CHRNA5 | Smokers   | rs16969968(p.Asp398Asn.c.1192G>A)            | A vs G                  | 4                                            | 2828/3738      | 1.30(1.20-1.42)        | 2.77x10 <sup>-10</sup> | 0                  | 0.626                                         | 4       | 2828/3738      | 1.42(1.26-1.59) | 4.52x10 <sup>-9</sup> | 0                                              | 0.611                       | 4       | 2828/3738      | 1.43(1.21-1.69) | 2.08x10 <sup>-5</sup> | 0                  | 0.842                       |  |
| CYP1A1 | Smokers   | rs4646903(m1.Msp1.T3801C)                    | C vs T                  | 7                                            | 1034/1087      | 1.30(1.02-1.64)        | 0.033                  | 46                 | 0.088                                         | 21      | 3225/3067      | 1.38(1.14-1.67) | 0.001                 | 58                                             | 0.000                       | 9       | 1154/1218      | 1.57(1.03-2.38) | 0.034                 | 18                 | 0.285                       |  |
| CYP1A1 | Smokers   | rs1048943(*2C.m2.p.Ile462Val.c.1384A>G)      | G vs A                  | 8                                            | 1166/1586      | 1.25(0.97-1.62)        | 0.081                  | 62                 | 0.010                                         | 14      | 1888/2413      | 1.42(1.04-1.93) | 0.028                 | 78                                             | 0.000                       | 8       | 1166/1586      | 1.51(0.75-3.03) | 0.251                 | 45                 | 0.077                       |  |
| CYP1A2 | Smokers   | rs2069526(-739T>G)                           | G vs T                  | 3                                            | 412/401        | 1.89(0.96-3.71)        | 0.065                  | 46                 | 0.155                                         | 4       | 534/435        | 1.40(0.47-4.16) | 0.547                 | 85                                             | 0.000                       |         |                |                 |                       |                    |                             |  |
| CYP1A2 | Smokers   | rs2069514(CYP1A2*1C,-3860G>A)                | A vs G                  | 4                                            | 534/435        | 1.40(0.47-4.16)        | 0.547                  | 85                 | 0.000                                         | 3       | 507/544        | 0.90(0.42-1.94) | 0.783                 | 83                                             | 0.003                       | 3       | 553/555        | 0.80(0.37-1.73) | 0.573                 | 75                 | 0.018                       |  |
| CYP1A2 | Smokers   | rs762551(CYP1A2*1F.c.A-164C)                 | C vs A                  | 3                                            | 507/544        | 0.90(0.42-1.94)        | 0.783                  | 83                 | 0.003                                         | 3       | 542/528        | 1.86(0.94-3.68) | 0.075                 | 81                                             | 0.005                       |         |                |                 |                       |                    |                             |  |
| CYP1B1 | Smokers   | rs10012(p.Arg48Gly.c.142C>G)                 | G vs C                  | 3                                            | 495/491        | 1.48(0.72-3.04)        | 0.286                  | 83                 | 0.003                                         | 3       | 447/449        | 0.70(0.51-0.95) | 0.024                 | 0                                              | 0.481                       |         |                |                 |                       |                    |                             |  |
| CYP1B1 | Smokers   | rs1056827(p.Ala119Ser.c.355G>T.m2)           | T vs G                  | 3                                            | 622/684        | 1.28(1.01-1.62)        | 0.045                  | 0                  | 0.616                                         | 3       | 1527/1138      | 0.58(0.34-0.98) | 0.043                 | 66                                             | 0.055                       |         |                |                 |                       |                    |                             |  |
| CYP1B1 | Smokers   | rs1800440(p.Asn453Ser.Ex3+315A>G)            | G vs A                  | 3                                            | 1527/1138      | 0.57(0.33-1.00)        | 0.048                  | 73                 | 0.025                                         | 3       | 1449/1022      | 0.80(0.54-1.20) | 0.281                 | 70                                             | 0.019                       | 3       | 1339/848       | 0.44(0.28-0.71) | 0.001                 | 0                  | 0.768                       |  |
| CYP1B1 | Smokers   | rs1056836(CYP1B1*3.p.Leu432Val.c.1294C>G)    | G vs C                  | 5                                            | 622/684        | 1.28(1.01-1.62)        | 0.045                  | 0                  | 0.616                                         | 3       | 637/858        | 1.22(0.87-1.69) | 0.249                 | 24                                             | 0.266                       |         |                |                 |                       |                    |                             |  |
| CYP2A6 | Smokers   | rs5031016(p.Ile471Thr.c1412T>C.wt/*7)        | C vs T                  | 3                                            | 1339/848       | 0.71(0.59-0.85)        | 2.30x10 <sup>-4</sup>  | 13                 | 0.319                                         | 4       | 595/639        | 1.07(0.67-1.70) | 0.788                 | 24                                             | 0.267                       |         |                |                 |                       |                    |                             |  |
| CYP2A6 | Smokers   | non*4/*4*1/*4.a.deletion.of.the.CYP2A6.gene) | *4 vs non*4             | 3                                            | 1339/848       | 0.71(0.59-0.85)        | 2.30x10 <sup>-4</sup>  | 13                 | 0.319                                         | 3       | 637/858        | 1.22(0.87-1.69) | 0.249                 | 24                                             | 0.266                       |         |                |                 |                       |                    |                             |  |
| CYP2C9 | Smokers   | rs1799853(p.Arg144Cys.c.430C>T)              | T vs C                  | 3                                            | 381/3867       | (g.3739G>C.c.-1293G>C) |                        |                    |                                               | 3       | 595/639        | 1.07(0.67-1.70) | 0.788                 | 24                                             | 0.267                       |         |                |                 |                       |                    |                             |  |
| CYP2E1 | Smokers   | rs6413432(c.967+1143T>A.7632T>A)             | A vs T                  | 3                                            | 796/971        | 0.75(0.63-0.90)        | 0.002                  | 2                  | 0.360                                         | 6       | 960/944        | 0.57(0.37-0.87) | 0.010                 | 55                                             | 0.047                       |         |                |                 |                       |                    |                             |  |
| CYP2E1 | Smokers   | rs2031920(RsaI.c1>c2.-1053C>T)               | T vs C                  | 3                                            | 1064/1220      | 0.76(0.65-0.90)        | 0.001                  | 0                  | 0.727                                         | 10      | 1880/1949      | 0.76(0.63-0.91) | 0.003                 | 15                                             | 0.304                       |         |                |                 |                       |                    |                             |  |
| EPHX1  | Smokers   | rs1051740(p.Tyr113His.c.337T>C)              | C vs T                  | 5                                            | 840/1270       | 0.87(0.57-1.33)        | 0.526                  | 88                 | 0.000                                         | 6       | 885/1315       | 0.98(0.56-1.75) | 0.956                 | 88                                             | 0.000                       | 6       | 1074/1364      | 0.99(0.60-1.63) | 0.971                 | 66                 | 0.011                       |  |
| EPHX1  | Smokers   | rs2234922(p.His139Arg.c.416A>G)              | G vs A                  | 5                                            | 817/1230       | 1.26(0.89-1.78)        | 0.200                  | 76                 | 0.002                                         | 6       | 862/1275       | 1.34(0.87-2.05) | 0.182                 | 77                                             | 0.001                       | 5       | 909/845        | 1.42(1.02-1.97) | 0.039                 | 0                  | 0.535                       |  |
| ERCC1  | Smokers   | rs2298881(262G>T.C>A)                        | T vs G                  | 3                                            | 1701/2361      | 1.01(0.92-1.12)        | 0.801                  | 0                  | 0.479                                         | 3       | 1600/2132      | 0.98(0.74-1.30) | 0.878                 | 65                                             | 0.059                       |         |                |                 |                       |                    |                             |  |
| ERCC1  | Smokers   | rs3212986(8092C>A.14443C>A)                  | A vs C                  | 3                                            | 1701/2361      | 1.01(0.92-1.12)        | 0.801                  | 0                  | 0.479                                         | 3       | 1701/2361      | 1.03(0.91-1.17) | 0.614                 | 0                                              | 0.844                       | 3       | 1701/2361      | 1.00(0.70-1.43) | 0.982                 | 46                 | 0.155                       |  |
| ERCC1  | Smokers   | rs3212961(IVS5+33C>A.1767T>C>A)              | A vs C                  | 3                                            | 1125/1074      | 0.93(0.81-1.07)        | 0.305                  | 0                  | 0.658                                         | 3       | 1190/1067      | 0.93(0.77-1.13) | 0.478                 | 0                                              | 0.465                       |         |                |                 |                       |                    |                             |  |
| ERCC1  | Smokers   | rs11615(rs3177700.p.Asn118Asn.c.354T>C)      | C vs T                  | 5                                            | 2011/2486      | 0.84(0.69-1.04)        | 0.112                  | 76                 | 0.003                                         | 4       | 1861/2316      | 0.77(0.47-1.25) | 0.290                 | 80                                             | 0.002                       | 4       | 1861/2316      | 0.77(0.58-1.03) | 0.083                 | 68                 | 0.024                       |  |
| ERCC2  | Smokers   | rs1799793(p.Asp312Asn.c.981G>A)              | A vs G                  | 5                                            | 1877/2526      | 0.98(0.88-1.10)        | 0.712                  | 24                 | 0.261                                         | 6       | 1973/2609      | 0.91(0.79-1.05) | 0.178                 | 16                                             | 0.314                       | 5       | 1877/2526      | 1.10(0.91-1.32) | 0.323                 | 0                  | 0.577                       |  |
| ERCC2  | Smokers   | rs13181(p.Lys751Gln.c.2251A>C)               | C vs A                  | 5                                            | 1629/2452      | 1.07(0.93-1.24)        | 0.341                  | 49                 | 0.101                                         | 5       | 1576/2363      | 1.03(0.85-1.25) | 0.772                 | 39                                             | 0.159                       | 5       | 1551/2341      | 1.12(0.93-1.34) | 0.232                 | 0                  | 0.491                       |  |
| ERCC4  | Smokers   | rs1800067(Arg415Gln)                         | A vs G                  | 3                                            | 1110/1807      | 1.09(0.89-1.34)        | 0.404                  | 0                  | 0.650                                         |         |                |                 |                       |                                                |                             |         |                |                 |                       |                    |                             |  |
| ERCC5  | Smokers   | rs17655(p.Asp104His.c.3310G>C)               | C vs G                  | 3                                            | 1092/1743      | 0.98(0.77-1.26)        | 0.886                  | 57                 | 0.096                                         |         |                |                 |                       |                                                |                             |         |                |                 |                       |                    |                             |  |
| EXO1   | Smokers   | rs1047840(p.Glu589Lys.c.1765G>A)             | A vs G                  | 3                                            | 884/840        | 1.23(0.80-1.90)        | 0.342                  | 79                 | 0.008                                         |         |                |                 |                       |                                                |                             |         |                |                 |                       |                    |                             |  |
| GSTM1  | Smokers   | Present/Null(Large gene deletion)            | Null vs present         | 45                                           | 9276/9005      | 1.20(1.09-1.32)        | 2.16x10 <sup>-4</sup>  | 51                 | 0.000                                         | 3       | 645/624        | 0.93(0.66-1.31) | 0.686                 | 41                                             | 0.183                       |         |                |                 |                       |                    |                             |  |
| GSTM3  | Smokers   | rs1799735(c.468>21delAGG.3bp.deletion.*A/*B) | Del vs non-del          | 3                                            | 924/1026       | 1.63(1.28-2.08)        | 9.17x10 <sup>-5</sup>  | 0                  | 0.459                                         | 2       | 1519/4713      | 1.22(1.07-1.38) | 0.003                 | 46                                             | 0.014                       | 8       | 2830/2178      | 1.37(1.07-1.77) | 0.014                 | 23                 | 0.250                       |  |
| GSTP1  | Smokers   | rs1138272(p.Ala114Val.c.341C>T)              | T vs C                  | 3                                            | 8              | 2830/2178              | 1.29(1.09-1.53)        | 0.003              | 59                                            | 0.017   | 20             | 1519/4713       | 1.22(1.07-1.38)       | 0.003                                          | 46                          | 0.014   |                |                 |                       |                    |                             |  |
| GSTP1  | Smokers   | rs16995(p.Ile105Val.c.313A>G)                | G vs A                  | 8                                            | 2830/2178      | 1.29(1.09-1.53)        | 0.003                  | 59                 | 0.017                                         | 3       | 2180/1934      | 1.12(0.99-1.27) | 0.086                 | 0                                              | 0.408                       |         |                |                 |                       |                    |                             |  |
| GSTT1  | Smokers   | Present/Null(Large gene deletion)            | Null vs present         | 27                                           | 7032/6386      | 1.08(0.95-1.22)        | 0.263                  | 41                 | 0.014                                         | 3       | 2471/2002      | 0.93(0.82-1.06) | 0.295                 | 0                                              | 0.462                       |         |                |                 |                       |                    |                             |  |
| IL1B   | Smokers   | rs1143627(g.4970C>T,-31T>C)                  | C vs T                  | 3                                            | 2180/1934      | 1.12(0.99-1.27)        | 0.086                  | 0                  | 0.408                                         |         |                |                 |                       |                                                |                             |         |                |                 |                       |                    |                             |  |
| IL6    | Smokers   | rs1800795(G-174C)                            | C vs G                  | 3                                            | 2471/2002      | 0.93(0.82-1.06)        | 0.295                  | 0                  | 0.462                                         |         |                |                 |                       |                                                |                             |         |                |                 |                       |                    |                             |  |
| IL8    | Smokers   | rs4073(T-251A)                               | T vs A                  | 3                                            | 2471/2002      | 0.93(0.82-1.06)        | 0.295                  | 0                  | 0.462                                         |         |                |                 |                       |                                                |                             |         |                |                 |                       |                    |                             |  |
| LIG1   | Smokers   | rs20580(p.Ala170Ala.c.417C>A)                | A vs C                  | 3                                            | 1367/2175      | 1.06(0.96-1.18)        | 0.256                  | 6                  | 0.364                                         | 3       | 1225/2004      | 1.11(0.94-1.31) | 0.228                 | 0                                              | 0.516                       | 3       | 1225/2004      | 1.15(0.98-1.37) | 0.095                 | 0                  | 0.898                       |  |
| MDM2   | Smokers   | rs2279744(SNP309.c.14+309T>G)                | G vs T                  | 4                                            | 2941/4189      | 1.00(0.80-1.28)        | 0.932                  | 90                 | 0.000                                         | 4       | 2941/4189      | 0.96(0.71-1.31) | 0.790                 | 88                                             | 0.000                       | 4       | 2941/4189      | 1.12(0.83-1.51) | 0.466                 | 78                 | 0.004                       |  |
| MMP1   | Smokers   | rs1799750(-16071G/G.insG)                    | 2G vs 1G                | 3                                            | 2400/1389      | 1.32(0.85-2.04)        | 0.211                  | 84                 | 0.002                                         |         |                |                 |                       |                                                |                             |         |                |                 |                       |                    |                             |  |
| MPO    | Smokers   | rs2333227(G-463A)                            | A vs G                  | 9                                            | 2987/2720      | 0.99(0.86-1.14)        | 0.893                  | 50                 | 0.045                                         | 9       | 2987/2720      | 1.00(0.87-1.13) | 0.946                 | 21                                             | 0.254                       | 10      | 3190/2887      | 1.06(0.68-1.65) | 0.814                 | 70                 | 0.001                       |  |
| MTHFR  | Smokers   | rs1801131(p.Ala429Glu.c.1286A>C.A1298C)      | C vs A                  | 3                                            | 1245/1383      | 1.14(1.01-1.27)        | 0.031                  | 0                  | 0.871                                         | 3       | 1245/1383      | 1.16(0.99-1.35) | 0.060                 | 0                                              | 0.999                       | 4       | 1423/1587      | 1.18(0.94-1.48) | 0.164                 | 0                  | 0.559                       |  |
| MTHFR  | Smokers   | rs1801133(p.Ala222Val.Ex4+79C>T)             | T vs C                  | 4                                            | 1531/1947      | 0.93(0.79-1.08)        | 0.324                  | 40                 | 0.171                                         | 4       | 1531/1947      | 0.87(0.74-1.03) | 0.100                 | 23                                             | 0.274                       | 5       | 1840/2117      | 1.27(0.82-1.97) | 0.287                 | 70                 | 0.011                       |  |
| NAT2   | Smokers   | rs1799930(p.Arg197Gln.590G>A.NAT2*6B)        | A vs G                  | 3                                            | 428/476        | 0.81(0.66-0.99)        | 0.044                  | 0                  | 0.453                                         | 4       | 662/570        | 0.91(0.63-1.32) | 0.621                 | 59                                             | 0.064                       | 3       | 428/476        | 0.82(0.52-1.30) | 0.402                 | 0                  | 0.402                       |  |
| NAT2   | Smokers   | Rapid/slow (Acetylation Phenotype)           | Slow vs rapid           | 7                                            | 1290/1379      | 1.08(0.80-1.44)        | 0.623                  | 55                 | 0.037                                         |         |                |                 |                       |                                                |                             |         |                |                 |                       |                    |                             |  |
| NBN    | Smokers   | rs1805794(p.Gln185Glu.Ex5-32C>G.605C>G)      | G vs C                  | 3                                            | 1805/666       | 1.10(0.90-1.36)        | 0.355                  | 58                 | 0.049                                         | 13      | 3231/3021      | 1.04(0.90-1.20) | 0.586                 | 33                                             | 0.118                       | 3       | 1226/1220      | 0.83(0.71-0.98) | 0.030                 | 0                  | 0.554                       |  |
| NQO1   | Smokers   | rs1800566(p.Pro187Ser.c.648C>T.609C>T.*2)    | T vs C                  | 5                                            | 1687/1677      | 1.10(0.90-1.36)        | 0.355                  | 58                 | 0.049                                         | 13      | 4829/3926      | 0.99(0.83-1.17) | 0.901                 | 55                                             | 0.009                       | 5       | 1687/1677      | 1.17(0.72-1.93) | 0.527                 | 42                 | 0.140                       |  |
| OGG1   | Smokers   | rs102133(p.Ser326Cys.c.977C>G.8055C>G)       | G vs C                  | 13                                           | 4847/3994      | 0.99(0.86-1.15)        | 0.900                  | 73                 | 0.000                                         | 13      | 265/202        | 1.30(0.65-2.58) | 0.458                 | 63                                             | 0.069                       | 12      | 4704/3834      | 1.06(0.82-1.37) | 0.668                 | 67                 | 0.000                       |  |
| PADPRP | Smokers   | A/B(a 193-bp deletion)                       | Del vs non-del          | 4                                            | 2629/2077      | 1.06(0.65-1.70)        | 0.826                  | 90                 | 0.000                                         | 4       | 1444/1188      | 1.58(1.00-2.48) | 0.049                 | 70</                                           |                             |         |                |                 |                       |                    |                             |  |



| Genes           | Sub-group   | Variants                                  | Comparison <sup>a</sup> | Results of meta-analysis using allelic model |                |                 |                       |                    |                             | Results of meta-analysis using dominant model |                |                 |         |                    |                             | Results of meta-analysis using recessive model |                 |                 |         |                    |                             |
|-----------------|-------------|-------------------------------------------|-------------------------|----------------------------------------------|----------------|-----------------|-----------------------|--------------------|-----------------------------|-----------------------------------------------|----------------|-----------------|---------|--------------------|-----------------------------|------------------------------------------------|-----------------|-----------------|---------|--------------------|-----------------------------|
|                 |             |                                           |                         | Studies                                      | Cases/Controls | OR(95% CI)      | P value               | I <sup>2</sup> (%) | P <sub>0</sub> <sup>b</sup> | Studies                                       | Cases/Controls | OR(95% CI)      | P value | I <sup>2</sup> (%) | P <sub>0</sub> <sup>b</sup> | Studies                                        | Cases/Controls  | OR(95% CI)      | P value | I <sup>2</sup> (%) | P <sub>0</sub> <sup>b</sup> |
| <i>IL1B</i>     | Non-smokers | rs1143627(g.4970C>T,-31T>C)               | C vs T                  | 3                                            | 509/1568       | 1.20(0.91-1.59) | 0.204                 | 70                 | 0.036                       | 4                                             | 523/1827       | 1.27(0.93-1.75) | 0.139   | 43                 | 0.151                       | 3                                              | 509/1568        | 1.15(0.82-1.62) | 0.423   | 34                 | 0.218                       |
| <i>IL6</i>      | Non-smokers | rs1800796(-572C>G,634C>G)                 | G vs C                  | 5                                            | 1234/2035      | 0.88(0.66-1.16) | 0.360                 | 75                 | 0.003                       | 3                                             | 1234/2035      | 0.88(0.62-1.26) | 0.499   | 78                 | 0.001                       | 5                                              | 1234/2035       | 0.78(0.56-1.09) | 0.145   | 0                  | 0.722                       |
| <i>MDM2</i>     | Non-smokers | rs2279744(SNP309,c.14+309T>G)             | G vs T                  | 6                                            | 1642/3277      | 1.13(0.94-1.35) | 0.188                 | 66                 | 0.012                       | 6                                             | 1642/3277      | 1.22(0.95-1.58) | 0.124   | 61                 | 0.025                       | 6                                              | 1642/3277       | 1.17(0.92-1.48) | 0.200   | 39                 | 0.146                       |
| <i>MIR146A</i>  | Non-smokers | rs2910164(C>G)                            | C vs G                  |                                              |                |                 |                       |                    |                             |                                               |                |                 |         |                    | 3                           | 538/717                                        | 1.29(0.99-1.67) | 0.062           | 3       | 0.355              |                             |
| <i>MIR196A2</i> | Non-smokers | rs11614913(T>C)                           | C vs T                  | 3                                            | 369/529        | 0.79(0.45-1.39) | 0.407                 | 84                 | 0.002                       | 3                                             | 369/529        | 1.28(0.93-1.75) | 0.129   | 0                  | 0.903                       | 3                                              | 369/529         | 0.54(0.21-1.41) | 0.208   | 85                 | 0.001                       |
| <i>MMP1</i>     | Non-smokers | rs1799750(-16071G/2G,insG)                | 2G vs 1G                |                                              |                |                 |                       |                    |                             |                                               |                |                 |         |                    | 3                           | 304/665                                        | 0.95(0.70-1.28) | 0.718           | 0       | 0.774              |                             |
| <i>MPO</i>      | Non-smokers | rs2333227(G-463A)                         | A vs G                  | 4                                            | 384/848        | 0.84(0.63-1.12) | 0.233                 | 0                  | 0.986                       | 4                                             | 384/848        | 0.83(0.61-1.15) | 0.265   | 0                  | 0.980                       | 5                                              | 495/1001        | 1.14(0.70-1.86) | 0.591   | 0                  | 0.868                       |
| <i>MTHFR</i>    | Non-smokers | rs1801131(p.Ala429Glu,c.1286A>C,A1298C)   | C vs A                  |                                              |                |                 |                       |                    |                             |                                               |                |                 |         |                    | 3                           | 339/407                                        | 1.46(0.83-2.57) | 0.187           | 0       | 0.594              |                             |
| <i>MTHFR</i>    | Non-smokers | rs1801133(p.Ala222Val,Ex4+79C>T)          | T vs C                  | 3                                            | 251/353        | 1.05(0.81-1.35) | 0.730                 | 0                  | 0.843                       | 3                                             | 251/353        | 1.08(0.77-1.50) | 0.664   | 0                  | 0.635                       | 4                                              | 404/562         | 1.19(0.79-1.81) | 0.412   | 0                  | 0.884                       |
| <i>NAT2</i>     | Non-smokers | Rapid/slow (Acetylation Phenotype)        | Slow vs rapid           | 7                                            | 673/1108       | 1.12(0.72-1.74) | 0.603                 | 70                 | 0.003                       |                                               |                |                 |         |                    |                             |                                                |                 |                 |         |                    |                             |
| <i>NQO1</i>     | Non-smokers | rs1800566(p.Pro187Ser,c.648C>T,609C>T,*2) | T vs C                  | 3                                            | 243/563        | 1.05(0.63-1.76) | 0.850                 | 67                 | 0.049                       | 9                                             | 461/1293       | 1.08(0.84-1.39) | 0.562   | 4                  | 0.399                       | 3                                              | 243/563         | 1.03(0.35-3.01) | 0.957   | 33                 | 0.224                       |
| <i>OGG1</i>     | Non-smokers | rs1052133(p.Ser326Cys,c.977C>G,8055C>G)   | G vs C                  | 10                                           | 1966/2674      | 1.14(1.04-1.24) | 0.007                 | 0                  | 0.785                       | 11                                            | 2068/2809      | 1.19(1.02-1.39) | 0.025   | 0                  | 0.867                       | 10                                             | 1966/2674       | 1.13(0.93-1.38) | 0.232   | 35                 | 0.129                       |
| <i>PADPRP</i>   | Non-smokers | A/B(a 193-bp deletion)                    | Del vs non-del          |                                              |                |                 |                       |                    |                             | 3                                             | 23/90          | 0.80(0.23-2.72) | 0.717   | 0                  | 0.517                       |                                                |                 |                 |         |                    |                             |
| <i>PTGS2</i>    | Non-smokers | rs5275(c.*427T>C,8473T>C)                 | C vs T                  | 4                                            | 604/1846       | 1.01(0.68-1.49) | 0.969                 | 65                 | 0.037                       |                                               |                |                 |         |                    |                             |                                                |                 |                 |         |                    |                             |
| <i>SOD2</i>     | Non-smokers | rs4880(rs1799725,Ala16Val)                | T vs C                  |                                              |                |                 |                       |                    |                             |                                               |                |                 |         |                    | 4                           | 271/765                                        | 1.00(0.60-1.68) | 0.993           | 48      | 0.125              |                             |
| <i>SULT1A1</i>  | Non-smokers | rs9282861(p.Arg213His,c.638G>A,*1/*2)     | A vs G                  | 4                                            | 370/675        | 1.35(1.00-1.83) | 0.051                 | 0                  | 0.609                       |                                               |                |                 |         |                    |                             |                                                |                 |                 |         |                    |                             |
| <i>TP53</i>     | Non-smokers | rs1042522(p.Pro72Arg,c.215C>G)            | C vs G                  | 9                                            | 1526/2415      | 0.93(0.73-1.18) | 0.538                 | 75                 | 0.000                       | 11                                            | 1717/2780      | 0.87(0.66-1.14) | 0.316   | 63                 | 0.002                       | 11                                             | 1882/2887       | 1.28(1.01-1.61) | 0.040   | 39                 | 0.088                       |
| <i>XRCC1</i>    | Non-smokers | rs25489(p.Arg280His,c.839G>A,Ex9+16G>A)   | A vs G                  | 5                                            | 666/1266       | 0.68(0.34-1.37) | 0.279                 | 81                 | 0.000                       |                                               |                |                 |         |                    |                             |                                                |                 |                 |         |                    |                             |
| <i>XRCC1</i>    | Non-smokers | rs1799782(p.Arg194Trp,c.580C>T,Ex6-22C>T) | T vs C                  | 4                                            | 552/1313       | 1.16(0.92-1.48) | 0.218                 | 0                  | 0.624                       |                                               |                |                 |         |                    |                             | 3                                              | 395/468         | 1.39(0.48-4.05) | 0.547   | 42                 | 0.180                       |
| <i>XRCC1</i>    | Non-smokers | rs25487(p.Gln399Arg,c.1196A>G)            | A vs G                  | 10                                           | 956/1923       | 1.04(0.74-1.46) | 0.839                 | 69                 | 0.001                       | 7                                             | 823/1644       | 1.04(0.63-1.70) | 0.892   | 57                 | 0.031                       |                                                |                 |                 |         |                    |                             |
| <i>XRCC1</i>    | Non-smokers | rs3213245(-77T>C)                         | C vs T                  | 3                                            | 977/1310       | 1.43(1.17-1.75) | 4.56x10 <sup>-4</sup> | 0                  | 0.530                       |                                               |                |                 |         |                    |                             |                                                |                 |                 |         |                    |                             |
| <i>XRCC3</i>    | Non-smokers | rs861539(p.Thr241Met,c.722C>T)            | T vs C                  | 3                                            | 180/281        | 0.87(0.42-1.82) | 0.713                 | 48                 | 0.145                       |                                               |                |                 |         |                    |                             |                                                |                 |                 |         |                    |                             |

Del=deletion.

<sup>a</sup> Allelic contrast or phenotype trait for common variants; genetic comparison for rare variants or variants only with genotype group data

<sup>b</sup> P-value of heterogeneity between studies

**Supplementary Table S8. Credibility assessment for variants with significant associations with lung cancer risk in subgroup meta-analyses by smoking status**

| Genes          | Sub-group   | Variants     | Alleles <sup>a</sup> | Number evaluated |                | Lung cancer risk meta-analysis |                         |                        |                    |           | Venice criteria grades <sup>d</sup> | Credibility of evidence <sup>e</sup> | Amount of evidence <sup>f</sup> |       | Protection from bias <sup>g</sup> |                  | Sensitivity analysis <sup>h</sup>                          |                         |                       | Low OR <sup>i</sup> | Modified $P^k$ | Excess $P^l$ | Begg's $P^{m,n}$ |                    |
|----------------|-------------|--------------|----------------------|------------------|----------------|--------------------------------|-------------------------|------------------------|--------------------|-----------|-------------------------------------|--------------------------------------|---------------------------------|-------|-----------------------------------|------------------|------------------------------------------------------------|-------------------------|-----------------------|---------------------|----------------|--------------|------------------|--------------------|
|                |             |              |                      | Studies          | Cases/Controls | Genetic models                 | OR(95% CI) <sup>b</sup> | P value                | I <sup>2</sup> (%) | $P_{Q^2}$ |                                     |                                      | Numbers                         | Grade | Grade                             | Reasons for bias | Reason for bias exemption                                  | Initial study influence |                       |                     |                |              |                  | Deviation from HWE |
|                |             |              |                      |                  |                |                                |                         |                        |                    |           |                                     |                                      |                                 |       |                                   |                  |                                                            | OR(95%CI)               | P value               |                     |                |              |                  |                    |
| <i>APEX1</i>   | Smokers     | rs1760944    | A/C                  | 3                | 655/647        | Allelic                        | 1.37(1.11-1.69)         | 0.003                  | 43                 | 0.174     | ABA                                 | Moderate                             | 1391                            | A     | B                                 | A                |                                                            | 1.50(1.25-1.80)         | 9.90×10 <sup>-6</sup> | None                | No             | 0.215        | 1.000            | 1.000              |
| <i>CHRNA5</i>  | Smokers     | rs16969968   | A/G                  | 4                | 2828/3738      | Allelic                        | 1.30(1.20-1.42)         | 2.77×10 <sup>-10</sup> | 0                  | 0.626     | AAAC                                | Weak                                 | 3925                            | A     | A                                 | C                | Small study                                                | 1.29(1.19-1.41)         | 1.27×10 <sup>-9</sup> | None                | No             | 0.093        | 0.317            | 0.174              |
| <i>CYP11A1</i> | Smokers     | rs4646903    | C/T                  | 7                | 1034/1087      | Allelic                        | 1.30(1.02-1.64)         | 0.033                  | 46                 | 0.088     | BBA                                 | Moderate                             | 749                             | B     | B                                 | A                |                                                            | 1.35(1.01-1.81)         | 0.043                 | NO                  | No             | 0.145        | 0.355            | 0.230              |
| <i>CYP11A1</i> | Smokers     | rs1048943    | G/A                  | 14               | 1888/2413      | Dominant                       | 1.42(1.04-1.93)         | 0.028                  | 78                 | 0         | ACC                                 | Weak                                 | 1493                            | A     | C                                 | C                | First study,HWE,small study, excess of significant studies | 1.38(1.00-1.92)         | 0.052                 | Yes                 | No             | 0.060        | 0.098            | 0.189              |
| <i>CYP11B1</i> | Smokers     | rs1800440    | G/A                  | 3                | 447/449        | Dominant                       | 0.70(0.51-0.95)         | 0.024                  | 0                  | 0.481     | BAC                                 | Weak                                 | 252                             | B     | A                                 | C                | First study                                                | 0.82(0.53-1.28)         | 0.388                 | None                | No             | 0.364        | 0.523            | 1.000              |
| <i>CYP11B1</i> | Smokers     | rs1056836    | G/C                  | 5                | 622/684        | Dominant                       | 1.28(1.01-1.62)         | 0.045                  | 0                  | 0.616     | BAC                                 | Weak                                 | 773                             | B     | A                                 | C                | First study                                                | 1.28(0.99-1.66)         | 0.064                 | NO                  | No             | 0.881        | 1.000            | 0.806              |
| <i>CYP2A6</i>  | Smokers     | rs5031016    | C/T                  | 3                | 1527/1138      | Allelic                        | 0.57(0.33-1.00)         | 0.048                  | 73                 | 0.025     | BCC                                 | Weak                                 | 465                             | B     | C                                 | C                | First study                                                | 0.46(0.17-1.24)         | 0.125                 | NO                  | No             | 0.587        | 1.000            | 0.296              |
| <i>CYP2A6</i>  | Smokers     | non*4/*4     | *4/non*4             | 3                | 1339/848       | Allelic                        | 0.71(0.59-0.85)         | 2.30×10 <sup>-4</sup>  | 13                 | 0.319     | BAA                                 | Moderate                             | 809                             | B     | A                                 | A                |                                                            | 0.59(0.43-0.80)         | 0.001                 | NO                  | No             | 0.150        | 0.253            | 1.000              |
| <i>CYP2E1</i>  | Smokers     | rs6413432    | A/T                  | 3                | 796/791        | Allelic                        | 0.75(0.63-0.90)         | 0.002                  | 2                  | 0.36      | BAA                                 | Moderate                             | 691                             | B     | A                                 | A                |                                                            | 0.74(0.62-0.88)         | 0.001                 | None                | No             | 0.433        | 1.000            | 0.296              |
| <i>CYP2E1</i>  | Smokers     | rs2031920    | T/C                  | 3                | 1064/1220      | Allelic                        | 0.76(0.65-0.90)         | 0.001                  | 0                  | 0.727     | BAA                                 | Moderate                             | 770                             | B     | A                                 | A                |                                                            | 0.78(0.66-0.92)         | 0.003                 | None                | No             | 0.638        | 1.000            | 0.296              |
| <i>EPHX1</i>   | Smokers     | rs2234922    | G/A                  | 5                | 909/845        | Recessive                      | 1.42(1.02-1.97)         | 0.039                  | 0                  | 0.535     | BAC                                 | Weak                                 | 195                             | B     | A                                 | C                | First study                                                | 1.41(0.99-1.99)         | 0.055                 | NO                  | No             | 0.835        | 0.455            | 0.806              |
| <i>GSTM1</i>   | Smokers     | Present/Null | NA                   | 45               | 9276/9005      | Null vs present                | 1.20(1.09-1.32)         | 2.16×10 <sup>-4</sup>  | 51                 | 0         | ACC                                 | Weak                                 | 9092                            | A     | C                                 | C                | Small study                                                | 1.19(1.08-1.31)         | 4.79×10 <sup>-4</sup> | None                | No             | 0.070        | 0.354            | 0.304              |
| <i>GSTP1</i>   | Smokers     | rs1138272    | T/C                  | 3                | 924/1026       | Dominant                       | 1.63(1.28-2.08)         | 9.17×10 <sup>-5</sup>  | 0                  | 0.459     | BAA                                 | Moderate                             | 315                             | B     | A                                 | A                |                                                            | 1.64(1.01-2.68)         | 0.046                 | None                | No             | 0.600        | 1.000            | 1.000              |
| <i>GSTP1</i>   | Smokers     | rs1695       | G/A                  | 8                | 2830/2178      | Allelic                        | 1.29(1.09-1.53)         | 0.003                  | 59                 | 0.017     | ACA                                 | Weak                                 | 3118                            | A     | C                                 | A                |                                                            | 1.25(1.05-1.50)         | 0.015                 | NO                  | No             | 0.298        | 0.474            | 0.536              |
| <i>MTHFR</i>   | Smokers     | rs1801131    | C/A                  | 3                | 1245/1383      | Allelic                        | 1.14(1.01-1.27)         | 0.031                  | 0                  | 0.871     | AAAC                                | Weak                                 | 1728                            | A     | A                                 | C                | First study,low OR                                         | 1.09(0.89-1.34)         | 0.423                 | NO                  | Yes            | 0.773        | 0.519            | 1.000              |
| <i>NAT2</i>    | Smokers     | rs1799930    | A/G                  | 3                | 428/476        | Allelic                        | 0.81(0.66-0.99)         | 0.044                  | 0                  | 0.453     | BAC                                 | Weak                                 | 514                             | B     | A                                 | C                | Small study                                                | 0.76(0.61-0.96)         | 0.020                 | None                | No             | 0.067        | 0.460            | 0.296              |
| <i>NBN</i>     | Smokers     | rs1805794    | G/C                  | 3                | 1226/1220      | Recessive                      | 0.83(0.71-0.98)         | 0.03                   | 0                  | 0.554     | BAA                                 | Moderate                             | 930                             | B     | A                                 | A                |                                                            | 0.81(0.66-0.98)         | 0.030                 | None                | No             | 0.240        | 0.519            | 0.296              |
| <i>SOD2</i>    | Smokers     | rs4880       | T/C                  | 3                | 1444/1188      | Allelic                        | 1.25(1.06-1.48)         | 0.007                  | 33                 | 0.224     | ABC                                 | Weak                                 | 2650                            | A     | B                                 | C                | First study                                                | 1.60(0.76-3.39)         | 0.215                 | NO                  | No             | 0.263        | 1.000            | 0.296              |
| <i>TP53</i>    | Smokers     | rs1042522    | C/G                  | 9                | 2747/2426      | Dominant                       | 1.23(1.01-1.50)         | 0.035                  | 57                 | 0.017     | ACC                                 | Weak                                 | 2971                            | A     | C                                 | C                | First study, excess of significant studies                 | 1.21(0.98-1.49)         | 0.084                 | NO                  | No             | 0.884        | 0.016            | 0.677              |
| <i>XRCC1</i>   | Smokers     | rs25489      | A/G                  | 3                | 724/762        | Allelic                        | 1.35(1.00-1.81)         | 0.048                  | 0                  | 0.589     | BAC                                 | Weak                                 | 192                             | B     | A                                 | C                | First study,HWE,small study                                | 1.50(0.99-2.27)         | 0.054                 | Yes                 | No             | 0.012        | 1.000            | 0.296              |
| <i>XRCC1</i>   | Smokers     | rs1799782    | T/C                  | 6                | 1597/1987      | Allelic                        | 0.73(0.55-0.97)         | 0.028                  | 40                 | 0.137     | BBC                                 | Weak                                 | 445                             | B     | B                                 | C                | First study,HWE                                            | 0.75(0.54-1.04)         | 0.087                 | Yes                 | No             | 0.410        | 0.321            | 1.000              |
| <i>XRCC1</i>   | Smokers     | rs25487      | A/G                  | 12               | 4087/3678      | Recessive                      | 0.79(0.63-1.00)         | 0.05                   | 41                 | 0.068     | BBC                                 | Weak                                 | 885                             | B     | B                                 | C                | First study,HWE                                            | 0.80(0.61-1.04)         | 0.100                 | Yes                 | No             | 0.345        | 1.000            | 0.451              |
| <i>ATM</i>     | Non-smokers | rs189037     | A/G                  | 3                | 1323/1550      | Allelic                        | 1.18(1.03-1.36)         | 0.018                  | 42                 | 0.178     | ABC                                 | Weak                                 | 2565                            | A     | B                                 | C                | First study,small study                                    | 1.15(0.93-1.43)         | 0.203                 | None                | No             | 0.077        | 0.576            | 1.000              |
| <i>CYP11A1</i> | Non-smokers | rs1048943    | G/A                  | 4                | 446/561        | Recessive                      | 1.93(1.03-3.63)         | 0.042                  | 32                 | 0.218     | CBC                                 | Weak                                 | 68                              | C     | B                                 | C                | First study                                                | 2.08(0.94-4.60)         | 0.069                 | None                | No             | 0.684        | 0.199            | 0.734              |
| <i>CYP2E1</i>  | Non-smokers | rs6413432    | A/T                  | 5                | 315/560        | Dominant                       | 0.72(0.54-0.97)         | 0.028                  | 0                  | 0.959     | BAA                                 | Moderate                             | 378                             | B     | A                                 | A                |                                                            | 0.72(0.53-0.96)         | 0.026                 | NO                  | No             | 0.837        | 0.489            | 0.806              |
| <i>CYP2E1</i>  | Non-smokers | rs2031920    | T/C                  | 3                | 304/695        | Allelic                        | 0.70(0.54-0.90)         | 0.005                  | 0                  | 0.863     | BAA                                 | Moderate                             | 375                             | B     | A                                 | A                |                                                            | 0.70(0.54-0.90)         | 0.005                 | None                | No             | 0.145        | 1.000            | 1.000              |
| <i>ERCC1</i>   | Non-smokers | rs11615      | C/T                  | 3                | 731/958        | Allelic                        | 0.85(0.72-0.99)         | 0.042                  | 0                  | 0.449     | AAA                                 | Strong                               | 2550                            | A     | A                                 | A                |                                                            | 0.78(0.62-0.98)         | 0.031                 | None                | No             | 0.898        | 0.483            | 1.000              |
| <i>ERCC2</i>   | Non-smokers | rs13181      | C/A                  | 3                | 478/469        | Dominant                       | 1.88(1.36-2.58)         | 1.11×10 <sup>-4</sup>  | 0                  | 0.55      | BAA                                 | Moderate                             | 249                             | B     | A                                 | A                |                                                            | 1.91(1.25-2.92)         | 0.003                 | None                | No             | 0.295        | 0.251            | 0.296              |
| <i>GSTM1</i>   | Non-smokers | Present/Null | NA                   | 32               | 1924/4718      | Null vs present                | 1.37(1.16-1.61)         | 1.60×10 <sup>-4</sup>  | 41                 | 0.009     | ABA                                 | Moderate                             | 3345                            | A     | B                                 | A                |                                                            | 1.40(1.18-1.65)         | 1.18×10 <sup>-4</sup> | None                | No             | 0.408        | 0.116            | 0.212              |
| <i>OGG1</i>    | Non-smokers | rs1052133    | G/C                  | 10               | 1966/2674      | Allelic                        | 1.14(1.04-1.24)         | 0.007                  | 0                  | 0.785     | AAAC                                | Weak                                 | 4670                            | A     | A                                 | C                | Low OR,publication bias                                    | 1.15(1.04-1.26)         | 0.004                 | NO                  | Yes            | 0.169        | 1.000            | 0.074              |
| <i>TP53</i>    | Non-smokers | rs1042522    | C/G                  | 11               | 1882/2887      | Recessive                      | 1.28(1.01-1.61)         | 0.04                   | 39                 | 0.088     | ABA                                 | Moderate                             | 1006                            | A     | B                                 | A                |                                                            | 1.29(1.00-1.65)         | 0.049                 | NO                  | No             | 0.355        | 0.215            | 0.586              |
| <i>XRCC1</i>   | Non-smokers | rs213245     | C/T                  | 3                | 977/1310       | Dominant                       | 1.43(1.17-1.75)         | 4.56×10 <sup>-4</sup>  | 0                  | 0.53      | BAA                                 | Moderate                             | 506                             | B     | A                                 | A                |                                                            | 1.39(1.09-1.77)         | 0.009                 | None                | No             | 0.107        | 0.618            | 0.296              |

NA=Not Applicable.  
<sup>a</sup>Minor alleles/major alleles (per Caucasian)  
<sup>b</sup>Summary ORs were calculated based on the DerSimonian-Lairs random-effects model  
<sup>c</sup>P-value of heterogeneity between studies  
<sup>d</sup>Venice criteria grades contained assessments of three aspects: the amount of evidence, extent of replication, and protection from bias, and each assessment was assigned three levels (A, B, or C).  
<sup>e</sup>Credibility of evidence was evaluated based on Venice criteria with three aspects (the amount of evidence, extent of replication, and protection from bias), and was categorized as strong (all three aspect grades were A), moderate (any grade was B, but not C) or weak (any grade was C).  
<sup>f</sup>Amount of evidence, depending on total sample size of the smallest genetic group among cases and controls in each meta-analysis, was graded as A (sample size>1000), B (sample size between 100 and 1000), or C (sample size<100).  
<sup>g</sup>Extent of replication, depending on between-study heterogeneity, was graded as A (I<sup>2</sup><25%), B (I<sup>2</sup> between 25% and 50%), or C (I<sup>2</sup>>50%)  
<sup>h</sup>Protection from bias, considering various potential sources of bias in meta-analysis, was graded as A when there was no demonstrable bias and bias was unlikely invalidate the association, was graded as B when there was insufficient information for identifying evidence (i.e. missing information for evaluating Hardy-Weinberg equilibrium (HWE) among controls in an individual study) although there was no obvious bias, and C when the bias was evident and/or was likely to explain the presence of association. For the C grade, it was assigned if a meta-analysis had any of the following potential sources of bias: (1) magnitude of the association was low; (2) sensitivity analysis altered the statistical significance; (3) potential small study effect; (4) possible existence of an excess of significant findings (the number of observed significant studies more than the number of expected significant studies); (5) potential publication bias.  
<sup>i</sup>Small study=Possible existence of potential small study effect (modified Egger's test, p<0.10); First study=Significance lost excluding the first published or first positive report (defined as the earliest study reported a significant association), or excluding studies with controls violating HWE; Excess of significant studies=Possible existence of an excess of significant findings (excess significance test, p<0.10); Low OR=Low magnitude of the association (i.e. 0.87<OR<1.15); Publication bias= Possible existence of potential publication bias (Begg's test, p<0.10).  
<sup>j</sup>A sensitivity analysis was performed to examine whether the significant summary ORs were robust after excluding the first published or first positive report (defined as the earliest study reported a significant association), or excluding studies with controls violating HWE. None=A meta-analysis didn't include studies with controls violating HWE or evaluated association for a variant with a phenotype change; NO=Without the influence from studies with controls violating HWE; Yes=Evidence of influence from studies with controls violating HWE.  
<sup>k</sup>Low OR (i.e. 0.87<OR<1.15; No=Association without a low OR; Yes=Association with a low OR)  
<sup>l</sup>P value for potential small study effect based on the modified Egger's test (P<0.10 is usually considered evidence for significant evidence of small study effect).  
<sup>m</sup>P value for possible existing an excess of significant findings based on the excess significance test. (P<0.10 is usually considered evidence for significant evidence of an excess of significant findings).  
<sup>n</sup>P value for potential publication bias of studies based on the Begg's test. (P<0.10 is usually considered evidence for significant evidence of publication bias).

**Supplementary Table S9. Credibility assessment for variants with non-significant associations with lung cancer risk in meta-analyses for all available data** (Continued on next page)

| Gene    | Variant                               | Ethnicity | Comparison*              | Number evaluated |                | Lung cancer risk meta-analysis |         |        |                             |                    | Begg P | Evaluation of the evidence <sup>d</sup> |             |      | Grade of evidence <sup>e</sup> | Credibility of evidence <sup>f</sup> |
|---------|---------------------------------------|-----------|--------------------------|------------------|----------------|--------------------------------|---------|--------|-----------------------------|--------------------|--------|-----------------------------------------|-------------|------|--------------------------------|--------------------------------------|
|         |                                       |           |                          | Studies          | Cases/Controls | OR(95% CI) <sup>b</sup>        | P value | Q      | P <sub>o</sub> <sup>c</sup> | I <sup>2</sup> (%) |        | Power                                   | Replication | Bias |                                |                                      |
| ERCC1   | rs16979802(15310G>C)                  | Caucasian | C vs G                   | 3                | 1311/2114      | 0.87(0.74-1.03)                | 0.102   | 0.87   | 0.647                       | 0                  | 1.000  | A                                       | A           | A    | AAA                            | Strong                               |
| ERCC1   | rs2298881(262G>T,C>A)                 | All       | T vs G                   | 4                | 3049/3791      | 0.99(0.91-1.07)                | 0.723   | 3.50   | 0.320                       | 14                 | 0.308  | A                                       | A           | A    | AAA                            | Strong                               |
| ERCC1   | rs735482(p.Lys261Thr.A>C)             | All       | C vs A                   | 5                | 1682/2797      | 1.02(0.91-1.15)                | 0.709   | 4.34   | 0.362                       | 8                  | 0.462  | A                                       | A           | A    | AAA                            | Strong                               |
| POLL    | rs3730668(-78G>T)                     | All       | T vs G                   | 3                | 672/823        | 0.94(0.80-1.09)                | 0.397   | 0.63   | 0.731                       | 0                  | 1.000  | A                                       | A           | A    | AAA                            | Strong                               |
| PPARG   | rs1801282(p.Pro12Ala.c.36C>G)         | All       | G vs C                   | 4                | 2476/3377      | 1.00(0.88-1.12)                | 0.956   | 0.82   | 0.844                       | 0                  | 0.734  | A                                       | A           | A    | AAA                            | Strong                               |
| PTGS2   | rs20417(-765G>C)                      | All       | C vs G                   | 4                | 2355/2731      | 0.96(0.86-1.08)                | 0.505   | 1.84   | 0.606                       | 0                  | 1.000  | A                                       | A           | A    | AAA                            | Strong                               |
| TNF     | rs1799724(-857C>T,-1036C>T)           | All       | C vs T                   | 3                | 2080/2164      | 0.98(0.86-1.11)                | 0.727   | 1.80   | 0.406                       | 0                  | 1.000  | A                                       | A           | A    | AAA                            | Strong                               |
| ERCC2   | rs1799793(p.Asp312Asn.c.981G>A)       | All       | A vs G                   | 26               | 10209/12967    | 1.02(0.95-1.09)                | 0.637   | 43.81  | 0.011                       | 43                 | 0.628  | A                                       | B           | A    | ABA                            | Moderate                             |
| TYMS    | 28-bp tandem repeat                   | All       | 2R vs 3R                 | 4                | 2052/2861      | 0.99(0.90-1.08)                | 0.742   | 1.79   | 0.618                       | 0                  | 1.000  | A                                       | A           | B    | AAB                            | Moderate                             |
| XPC     | rs2228000(p.Ala499Val,Ex9-377C>T)     | All       | T vs C                   | 6                | 2981/3537      | 1.05(0.97-1.14)                | 0.205   | 5.17   | 0.395                       | 3                  | 1.000  | B                                       | A           | A    | BAA                            | Moderate                             |
| XRC3    | rs861539(p.Thr241Met.c.722C>T)        | All       | T vs C                   | 18               | 6407/8356      | 1.04(0.95-1.13)                | 0.414   | 27.73  | 0.048                       | 39                 | 0.705  | A                                       | B           | A    | ABA                            | Moderate                             |
| ABC1    | rs1045642(p.Ile1145Leu.c.3435T>C)     | All       | T vs C                   | 4                | 1025/1080      | 1.30(0.79-2.16)                | 0.307   | 28.98  | 0.000                       | 90                 | 0.308  | C                                       | C           | A    | CCA                            | Weak                                 |
| ACE     | 287-bp rsnpatt11D                     | All       | Ins vs del               | 8                | 1730/8359      | 1.01(0.85-1.21)                | 0.885   | 19.95  | 0.006                       | 65                 | 0.536  | A                                       | C           | C    | ACC                            | Weak                                 |
| AGER    | rs1800625(-429T>C,Alu1)               | Asian     | C vs T                   | 3                | 1656/1693      | 1.16(0.78-1.74)                | 0.468   | 20.99  | 0.000                       | 91                 | 1.000  | C                                       | C           | A    | CCA                            | Weak                                 |
| AGER    | rs2070600(p.Gly82Ser.c.244G>A)        | All       | A vs G                   | 4                | 2104/2178      | 1.10(0.93-1.31)                | 0.270   | 7.15   | 0.067                       | 58                 | 0.089  | C                                       | C           | C    | CCC                            | Weak                                 |
| AHR     | rs2066853(Arg554Lys,Ex10-501G>A)      | All       | A vs G                   | 5                | 1749/1925      | 0.96(0.84-1.10)                | 0.567   | 5.82   | 0.213                       | 31                 | 1.000  | C                                       | B           | A    | CBA                            | Weak                                 |
| ALDH2   | rs671(p.Glu487Lys,Ex10-501G>A)        | All       | A vs G                   | 3                | 1555/2079      | 1.36(0.74-2.50)                | 0.322   | 29.62  | 0.000                       | 93                 | 1.000  | C                                       | C           | A    | CCA                            | Weak                                 |
| APEX1   | rs1048945(p.Gln51His.c.153G>C)        | Caucasian | C vs G                   | 3                | 745/816        | 0.93(0.67-1.31)                | 0.684   | 0.30   | 0.859                       | 0                  | 1.000  | C                                       | C           | A    | CAA                            | Weak                                 |
| APEX1   | rs2307486(p.Ile64Val.c.190A>G)        | All       | G vs A                   | 4                | 2281/2505      | 0.82(0.63-1.06)                | 0.121   | 6.35   | 0.096                       | 53                 | 0.089  | C                                       | C           | C    | CCC                            | Weak                                 |
| ATM     | rs609429(IVS48+238C>G)                | All       | (GG+GC) vs CC            | 3                | 1490/1501      | 0.82(0.66-1.03)                | 0.086   | 3.02   | 0.221                       | 34                 | 1.000  | C                                       | B           | A    | CBA                            | Weak                                 |
| ATM     | rs664143(IVS34G+60A)                  | All       | (GG+GA) vs AA            | 3                | 1465/1465      | 0.93(0.79-1.10)                | 0.392   | 1.61   | 0.447                       | 0                  | 0.296  | C                                       | A           | C    | CAC                            | Weak                                 |
| AURKA   | rs2273535(p.Phe311Ile.c.91T>A)        | Caucasian | A vs T                   | 3                | 2001/2069      | 0.96(0.86-1.06)                | 0.421   | 0.63   | 0.730                       | 0                  | 0.296  | C                                       | A           | A    | CAA                            | Weak                                 |
| AURKA   | rs1047972(p.Ile57Val.c.169A>G)        | Caucasian | A vs G                   | 3                | 2463/2283      | 0.96(0.86-1.07)                | 0.425   | 1.65   | 0.437                       | 0                  | 0.296  | C                                       | A           | A    | CAA                            | Weak                                 |
| BRCA2   | rs144848(p.Asn372His.c.1114A>C)       | All       | C vs A                   | 4                | 1588/2513      | 1.00(0.82-1.21)                | 0.959   | 6.90   | 0.075                       | 57                 | 0.734  | C                                       | A           | A    | CAA                            | Weak                                 |
| CASC8   | rs1447295(C>A)                        | All       | A vs C                   | 3                | 1541/2057      | 1.00(0.88-1.14)                | 0.991   | 1.52   | 0.469                       | 0                  | 1.000  | C                                       | A           | A    | CAA                            | Weak                                 |
| CASP5   | rs523104(p.Leu318Val.c.748C>G)        | All       | C vs G                   | 3                | 758/943        | 1.12(0.98-1.29)                | 0.105   | 1.18   | 0.554                       | 0                  | 1.000  | C                                       | A           | A    | CAA                            | Weak                                 |
| CASP8   | rs3834129(-6526Ndel.-CTTACT)          | All       | Del vs non-del           | 4                | 2737/2696      | 0.95(0.77-1.17)                | 0.631   | 16.45  | 0.001                       | 82                 | 0.308  | C                                       | B           | A    | CCA                            | Weak                                 |
| CASP8   | rs1045485(p.Asp302His.c.853G>C)       | All       | C vs G                   | 4                | 1054/1259      | 1.20(0.97-1.49)                | 0.101   | 4.02   | 0.260                       | 25                 | 1.000  | C                                       | B           | A    | CBA                            | Weak                                 |
| CCND1   | rs678653(G>C)                         | All       | C vs G                   | 3                | 1323/1901      | 1.03(0.85-1.24)                | 0.773   | 5.03   | 0.081                       | 60                 | 1.000  | C                                       | C           | A    | CCA                            | Weak                                 |
| CCND1   | rs9344(rs603965.p.Pro241Pro.c.723G>A) | All       | A vs G                   | 11               | 6087/7315      | 1.02(0.92-1.12)                | 0.696   | 30.90  | 0.001                       | 68                 | 0.533  | C                                       | C           | C    | CCC                            | Weak                                 |
| CDKN1A  | rs1801270(p.Ser31Arg.c.93C>A,6829C>A) | All       | A vs G                   | 9                | 4039/4804      | 1.04(0.89-1.21)                | 0.663   | 16.82  | 0.032                       | 52                 | 0.029  | C                                       | C           | C    | CCC                            | Weak                                 |
| CDKN2A  | rs3731249(p.Ala148Thr.c.442G>A)       | Caucasian | (AA+AG) vs GG            | 3                | 2875/2707      | 1.38(0.81-2.35)                | 0.230   | 4.56   | 0.102                       | 56                 | 0.296  | C                                       | C           | C    | CCC                            | Weak                                 |
| CHRNA3  | rs3743073(A>C)                        | All       | G vs T                   | 3                | 1391/1500      | 1.27(0.89-1.83)                | 0.191   | 23.05  | 0.000                       | 91                 | 0.296  | A                                       | C           | C    | ACC                            | Weak                                 |
| COMT    | rs4680(p.Val158Met.c.472G>A)          | All       | A vs G                   | 5                | 1497/1958      | 1.09(0.84-1.43)                | 0.517   | 21.84  | 0.000                       | 82                 | 0.806  | B                                       | C           | C    | BCC                            | Weak                                 |
| CRP     | rs2308603(T>C)                        | All       | C vs T                   | 3                | 826/895        | 0.82(0.68-1.01)                | 0.056   | 2.79   | 0.248                       | 28                 | 1.000  | C                                       | B           | A    | CBA                            | Weak                                 |
| CTLA4   | rs3087243(p.G230G>A,CT60)             | All       | C vs A                   | 3                | 1132/1220      | 0.99(0.86-1.14)                | 0.887   | 1.05   | 0.591                       | 0                  | 0.296  | C                                       | A           | C    | ACC                            | Weak                                 |
| CTLA4   | rs231775(p.Thr17Ala.c.49A>G)          | All       | G vs A                   | 6                | 2828/2953      | 0.88(0.64-1.21)                | 0.445   | 63.12  | 0.000                       | 92                 | 0.707  | C                                       | C           | C    | CCC                            | Weak                                 |
| CTLA4   | rs5742909(p.G319C>T,-318C>T)          | All       | T vs C                   | 4                | 1205/1349      | 0.68(0.30-1.56)                | 0.364   | 48.66  | 0.000                       | 94                 | 0.308  | C                                       | C           | A    | CCA                            | Weak                                 |
| CXCL12  | rs1801157(801G>A)                     | All       | A vs G                   | 3                | 489/815        | 1.29(0.76-2.18)                | 0.351   | 17.39  | 0.000                       | 89                 | 1.000  | B                                       | C           | A    | BCA                            | Weak                                 |
| CYP17A1 | rs743572(T-34C,Al1,A2)                | All       | A2 vs A1 (G vs A)        | 4                | 1245/1689      | 1.03(0.89-1.19)                | 0.701   | 4.80   | 0.187                       | 38                 | 0.308  | C                                       | B           | A    | CBA                            | Weak                                 |
| CYP11A1 | rs1799814(m4,Thr461Asn,C>A)           | All       | A vs C                   | 5                | 1712/1967      | 1.22(0.57-2.62)                | 0.617   | 51.87  | 0.000                       | 92                 | 0.806  | B                                       | C           | A    | BCA                            | Weak                                 |
| CYP11A1 | rs1800031(m3,T5639C)                  | All       | (CC+CT) vs TT            | 3                | 500/919        | 1.32(0.83-2.11)                | 0.248   | 0.63   | 0.730                       | 0                  | 0.296  | C                                       | A           | B    | CAB                            | Weak                                 |
| CYP11A1 | rs2606345(G>T,1561G>G)                | Caucasian | G vs T                   | 3                | 2770/3609      | 1.00(0.91-1.11)                | 0.937   | 3.05   | 0.217                       | 35                 | 1.000  | C                                       | B           | A    | CBA                            | Weak                                 |
| CYP11A2 | rs2069514(CYP11A2*1C,-3860G>A)        | All       | A vs G                   | 5                | 925/1383       | 1.55(0.64-3.74)                | 0.327   | 32.99  | 0.000                       | 88                 | 0.221  | A                                       | C           | A    | ACA                            | Weak                                 |
| CYP11A2 | rs2069526(-739T>G)                    | All       | G vs T                   | 3                | 396/494        | 1.70(0.77-3.76)                | 0.189   | 11.15  | 0.004                       | 82                 | 1.000  | A                                       | C           | A    | ACA                            | Weak                                 |
| CYP11A2 | rs35694136(-2467delT)                 | All       | Carriers vs non-carriers | 4                | 811/1254       | 1.16(0.67-2.02)                | 0.594   | 11.94  | 0.008                       | 75                 | 0.734  | A                                       | C           | C    | ACC                            | Weak                                 |
| CYP11B1 | rs1056827(p.Leu119Ser.c.355G>T,m2)    | All       | T vs G                   | 5                | 1501/2245      | 1.16(0.90-1.50)                | 0.253   | 18.67  | 0.001                       | 79                 | 1.000  | C                                       | A           | C    | CCA                            | Weak                                 |
| CYP2A13 | rs8192789(p.Arg257Cys,3375C>T)        | All       | (TT+TC) vs CC            | 3                | 1517/2231      | 0.81(0.57-1.15)                | 0.238   | 3.54   | 0.171                       | 43                 | 1.000  | C                                       | B           | B    | CCB                            | Weak                                 |
| CYP2C9  | rs1799853(p.Arg144Cys.c.430C>T)       | All       | (TT+TC) vs CC            | 4                | 756/1293       | 1.14(0.85-1.55)                | 0.381   | 4.57   | 0.206                       | 34                 | 1.000  | C                                       | B           | A    | CBA                            | Weak                                 |
| CYP2D6  | Phenotype (EM/HEM/PM)                 | All       | PM vs EM                 | 9                | 1627/1970      | 0.80(0.53-1.22)                | 0.296   | 9.90   | 0.272                       | 19                 | 0.348  | C                                       | A           | A    | CAA                            | Weak                                 |
| CYP2D6  | rs1065852(p.Pro34Ser,188C>T)          | All       | C vs T                   | 3                | 581/636        | 0.86(0.57-1.30)                | 0.463   | 9.94   | 0.007                       | 80                 | 0.296  | C                                       | C           | C    | CCC                            | Weak                                 |
| CYP2E1  | rs3813867(p.G739G>C,-1293G>C)         | All       | C vs G                   | 4                | 893/1029       | 0.94(0.56-1.56)                | 0.803   | 8.50   | 0.037                       | 65                 | 0.734  | C                                       | C           | C    | CCC                            | Weak                                 |
| CYP3A4  | rs2740574(-392A>G,*1A/*B)             | All       | G vs A                   | 4                | 1283/956       | 1.20(0.73-1.97)                | 0.465   | 9.14   | 0.028                       | 67                 | 1.000  | A                                       | C           | C    | ACC                            | Weak                                 |
| CYP3A5  | rs776746(A6986G,CYP3A5*3,22892A>C)    | All       | A vs G                   | 4                | 1166/929       | 0.65(0.36-1.16)                | 0.144   | 25.41  | 0.000                       | 88                 | 0.308  | A                                       | C           | A    | ACA                            | Weak                                 |
| DRD2    | rs1079597(G>A,Tag1)                   | All       | A vs G                   | 3                | 393/509        | 1.09(0.86-1.38)                | 0.499   | 1.53   | 0.465                       | 0                  | 0.296  | C                                       | A           | A    | CAA                            | Weak                                 |
| DRD2    | rs1800497(p.Glu714Lys,Ex11,Al1,C>T)   | All       | C vs T                   | 3                | 451/607        | 1.05(0.85-1.29)                | 0.667   | 0.48   | 0.786                       | 0                  | 1.000  | C                                       | A           | A    | CAA                            | Weak                                 |
| EPHX1   | rs1051740(p.Tyr113His.c.327A>T)       | All       | C vs T                   | 21               | 3461/7217      | 1.05(0.89-1.24)                | 0.564   | 106.98 | 0.000                       | 81                 | 0.057  | C                                       | C           | C    | CCC                            | Weak                                 |
| ERCC1   | rs3212948(C>G)                        | All       | G vs C                   | 5                | 2144/2544      | 1.04(0.89-1.22)                | 0.591   | 10.24  | 0.037                       | 61                 | 0.462  | A                                       | C           | A    | ACA                            | Weak                                 |
| ERCC1   | rs3212955(A>G)                        | All       | G vs C                   | 4                | 2271/2845      | 1.08(0.98-1.18)                | 0.109   | 2.42   | 0.490                       | 0                  | 0.734  | C                                       | A           | A    | CAA                            | Weak                                 |
| ERCC1   | rs3212961(IVS55+33C>A,17677C>A)       | All       | A vs C                   | 6                | 2207/2311      | 0.94(0.86-1.03)                | 0.167   | 4.90   | 0.428                       | 0                  | 1.000  | C                                       | A           | A    | CAA                            | Weak                                 |
| ERCC1   | rs3212986(8092C>A,14443C>A)           | All       | A vs C                   | 5                | 4079/4475      | 1.00(0.94-1.08)                | 0.931   | 1.63   | 0.804                       | 0                  | 0.806  | C                                       | A           | A    | CAA                            | Weak                                 |
| ERCC2   | rs1052555(Asp711Asp,G>A)              | All       | A vs G                   | 3                | 511/751        | 1.09(0.85-1.40)                | 0.493   | 2.95   | 0.228                       | 32                 | 0.296  | B                                       | A           | A    | CBA                            | Weak                                 |
| ERCC2   | rs171140(A>C)                         | All       | C vs A                   | 3                | 511/751        | 1.04(0.87-1.26)                | 0.645   | 0.61   | 0.736                       | 0                  | 1.000  | C                                       | A           | A    | CAA                            | Weak                                 |
| ERCC2   | rs1799787(IVS19-70C>T,G>A)            | All       | T vs C                   | 6                | 1792/2807      | 1.03(0.83-1.27)                | 0.824   | 10.74  | 0.057                       | 54                 | 1.000  | A                                       | C           | A    | ACA                            | Weak                                 |
| ERCC4   | rs1799801(p.Ser835Ser,Ex11-247T>C)    | All       | C vs T                   | 3                | 1009/1758      | 1.02(0.88-1.17)                | 0.835   | 2.16   | 0.339                       | 8                  | 1.000  | C                                       | A           | A    | CAA                            | Weak                                 |
| ERCC4   | rs1800067(Arg145Gln)                  | Caucasian | A vs G                   | 5                | 1521/2420      | 1.10(0.92-1.32)                | 0.286   | 1.19   | 0.880                       | 0                  | 0.806  | C                                       | A           | A    | CAA                            | Weak                                 |

| Gene             | Variant                                          | Ethnicity | Comparison <sup>a</sup> | Number evaluated |                | Lung cancer risk meta-analysis |         |       |                    |       | Begg P | Evaluation of the evidence <sup>d</sup> |      |   | Grade of evidence <sup>e</sup> | Credibility of evidence <sup>f</sup> |
|------------------|--------------------------------------------------|-----------|-------------------------|------------------|----------------|--------------------------------|---------|-------|--------------------|-------|--------|-----------------------------------------|------|---|--------------------------------|--------------------------------------|
|                  |                                                  |           |                         | Studies          | Cases/Controls | OR(95% CI) <sup>b</sup>        | P value | Q     | I <sup>2</sup> (%) | Power |        | Replication                             | Bias |   |                                |                                      |
|                  |                                                  |           |                         |                  |                |                                |         |       |                    |       |        |                                         |      |   |                                |                                      |
| <i>PADPRP</i>    | A/B(a 193-bp deletion)                           | All       | Del vs non-del          | 3                | 288/292        | 1.13(0.70-1.82)                | 0.617   | 6.42  | 0.040              | 69    | 0.296  | C                                       | C    | A | CCA                            | Weak                                 |
| <i>PARP1</i>     | rs1136410(p.Val762Ala,Ex17+8T>C)                 | All       | C vs T                  | 6                | 3192/2874      | 1.01(0.89-1.15)                | 0.842   | 12.64 | 0.027              | 60    | 1.000  | C                                       | C    | A | CCA                            | Weak                                 |
| <i>PCNA</i>      | rs25406(2232C>T)                                 | All       | T vs C                  | 4                | 970/1302       | 0.91(0.77-1.06)                | 0.231   | 4.99  | 0.172              | 40    | 0.734  | C                                       | B    | A | CBA                            | Weak                                 |
| <i>POLD1</i>     | rs1726801(p.Arg119His,c.356G>A)                  | Asian     | A vs G                  | 3                | 1263/1420      | 1.11(0.96-1.28)                | 0.168   | 1.61  | 0.448              | 0     | 0.296  | C                                       | A    | C | CAC                            | Weak                                 |
| <i>POLJ</i>      | rs8305(Thr706Ala,2180A>G)                        | All       | G vs A                  | 4                | 1655/2593      | 1.09(0.98-1.20)                | 0.111   | 2.17  | 0.537              | 0     | 0.734  | C                                       | A    | C | CAA                            | Weak                                 |
| <i>POLL</i>      | rs3730477(p.Arg438Trp,1683C>T)                   | All       | T vs C                  | 3                | 1356/1542      | 1.29(0.69-2.40)                | 0.425   | 4.07  | 0.131              | 51    | 1.000  | C                                       | C    | A | CCA                            | Weak                                 |
| <i>PPP1R13L</i>  | rs6966(T>A)                                      | All       | T vs A                  | 5                | 1120/1361      | 1.09(0.92-1.29)                | 0.302   | 6.96  | 0.138              | 43    | 0.806  | C                                       | B    | A | CBA                            | Weak                                 |
| <i>PPP1R13L</i>  | rs1970764(IVS1-4364A>G)                          | All       | G vs A                  | 3                | 678/726        | 1.12(0.90-1.39)                | 0.313   | 3.24  | 0.198              | 38    | 1.000  | C                                       | B    | A | CBA                            | Weak                                 |
| <i>PTGS2</i>     | rs5275(c.*427T>C,8473T>C)                        | All       | C vs T                  | 11               | 6813/7988      | 0.95(0.83-1.09)                | 0.493   | 58.16 | 0.000              | 83    | 0.755  | C                                       | C    | C | CCC                            | Weak                                 |
| <i>RAD23B</i>    | rs1805329(p.Ala249Val,Ex7+65C>T)                 | All       | T vs C                  | 4                | 653/878        | 1.10(0.80-1.51)                | 0.572   | 9.39  | 0.025              | 68    | 0.089  | C                                       | C    | C | CCC                            | Weak                                 |
| <i>REVI</i>      | rs3087386(p.Phe257Ser,892T>C)                    | All       | C vs T                  | 3                | 1437/1818      | 1.03(0.92-1.14)                | 0.658   | 0.51  | 0.775              | 0     | 1.000  | C                                       | A    | A | CAA                            | Weak                                 |
| <i>SULT1A1</i>   | rs9282861(p.Arg213His,c.638G>A,*1 <sup>8</sup> ) | All       | A vs G                  | 6                | 1965/2286      | 1.20(0.97-1.48)                | 0.094   | 18.08 | 0.003              | 72    | 1.000  | C                                       | C    | A | CCA                            | Weak                                 |
| <i>TDG</i>       | rs4135113(p.Gly199Ser,c.595G>A)                  | All       | A vs G                  | 3                | 289/318        | 0.85(0.51-1.42)                | 0.531   | 1.45  | 0.485              | 0     | 1.000  | C                                       | A    | A | CAA                            | Weak                                 |
| <i>TGFB1</i>     | rs1800469(C>509T)                                | Asian     | T vs C                  | 4                | 1091/1238      | 0.95(0.85-1.07)                | 0.428   | 3.10  | 0.377              | 3     | 0.089  | C                                       | A    | C | CAC                            | Weak                                 |
| <i>TGFB1</i>     | rs1800470(p.Leu10Pro,c.29C>T)                    | All       | C vs T                  | 7                | 1398/1553      | 1.16(0.97-1.39)                | 0.104   | 15.61 | 0.016              | 62    | 0.764  | C                                       | C    | A | CCA                            | Weak                                 |
| <i>TNF</i>       | rs361525(A>417G,-238G>A)                         | All       | A vs G                  | 6                | 1047/1099      | 1.07(0.55-2.08)                | 0.847   | 33.99 | 0.000              | 85    | 0.133  | C                                       | C    | C | CCC                            | Weak                                 |
| <i>TNFRSF10A</i> | rs2290229(p.Arg441Lys,c.1322G>A)                 | All       | G vs A                  | 5                | 1479/1932      | 1.06(0.80-1.39)                | 0.702   | 11.74 | 0.019              | 66    | 0.806  | C                                       | C    | A | CCA                            | Weak                                 |
| <i>TP53</i>      | rs1625895(IVS6+62G>A,A2>A1)                      | All       | A vs G                  | 8                | 2666/2847      | 1.10(0.90-1.34)                | 0.351   | 17.49 | 0.014              | 60    | 0.386  | C                                       | C    | A | CCA                            | Weak                                 |
| <i>TP53</i>      | rs1642785(IVS2-38G>C,1827G>C)                    | All       | C vs G                  | 5                | 534/621        | 1.05(0.88-1.25)                | 0.614   | 3.00  | 0.559              | 0     | 0.086  | C                                       | A    | C | CAC                            | Weak                                 |
| <i>TP53</i>      | rs17878362(IVS316bpDelIns)                       | Caucasian | Ins vs del              | 4                | 4196/4327      | 1.13(0.96-1.34)                | 0.152   | 8.22  | 0.042              | 64    | 0.734  | C                                       | C    | A | CCA                            | Weak                                 |
| <i>TP53BP1</i>   | rs560191(p.Asp353Glu,c.1059C>G)                  | All       | G vs C                  | 3                | 1393/1373      | 0.94(0.69-1.30)                | 0.723   | 15.68 | 0.000              | 87    | 1.000  | C                                       | C    | A | CCA                            | Weak                                 |
| <i>TP73</i>      | G4C1(A>A/T14)                                    | All       | AT vs GC                | 7                | 3054/3311      | 1.04(0.88-1.24)                | 0.647   | 23.42 | 0.001              | 74    | 0.024  | C                                       | C    | C | CCC                            | Weak                                 |
| <i>UGT1A6</i>    | rs1105879(p.Arg184Ser,c.552A>C)                  | All       | G vs T                  | 3                | 253/250        | 3.03(0.79-11.62)               | 0.106   | 36.84 | 0.000              | 95    | 0.296  | C                                       | C    | A | ACA                            | Weak                                 |
| <i>VEGFA</i>     | rs2010963(634G>C)                                | All       | C vs G                  | 5                | 2989/2522      | 1.12(0.99-1.27)                | 0.083   | 7.23  | 0.124              | 45    | 0.806  | C                                       | B    | A | CBA                            | Weak                                 |
| <i>VEGFA</i>     | rs3025039(C936T)                                 | All       | T vs C                  | 6                | 2887/2506      | 1.01(0.87-1.17)                | 0.917   | 7.10  | 0.213              | 30    | 1.000  | C                                       | B    | A | CBA                            | Weak                                 |
| <i>VEGFA</i>     | rs699947(C>2578A)                                | All       | A vs C                  | 4                | 879/804        | 0.97(0.81-1.15)                | 0.712   | 3.60  | 0.308              | 17    | 0.308  | C                                       | A    | A | CAA                            | Weak                                 |
| <i>vWF</i>       | rs295740(G>A)                                    | All       | A vs G                  | 3                | 2221/2334      | 1.02(0.92-1.13)                | 0.685   | 0.59  | 0.744              | 0     | 0.296  | C                                       | A    | A | CAA                            | Weak                                 |
| <i>XRCC1</i>     | rs2030404(A>G)                                   | All       | G vs A                  | 3                | 514/751        | 0.98(0.83-1.17)                | 0.836   | 2.05  | 0.359              | 2     | 1.000  | C                                       | A    | A | CAA                            | Weak                                 |
| <i>XRCC1</i>     | rs25486(A>G)                                     | All       | G vs A                  | 3                | 507/795        | 0.99(0.74-1.34)                | 0.955   | 5.17  | 0.076              | 61    | 1.000  | C                                       | C    | A | CCA                            | Weak                                 |
| <i>XRCC1</i>     | rs2682562(A>G)                                   | All       | G vs A                  | 3                | 513/751        | 1.00(0.79-1.25)                | 0.974   | 0.70  | 0.705              | 0     | 1.000  | C                                       | A    | A | CAA                            | Weak                                 |
| <i>XRCC1</i>     | rs2682585(p.His6Arg,c.17A>G)                     | All       | A vs G                  | 3                | 514/749        | 1.09(0.88-1.35)                | 0.416   | 1.91  | 0.385              | 0     | 1.000  | C                                       | A    | A | CAA                            | Weak                                 |
| <i>XRCC1</i>     | rs2854510(A>G)                                   | All       | G vs A                  | 3                | 513/751        | 0.97(0.79-1.20)                | 0.777   | 0.48  | 0.785              | 0     | 0.296  | C                                       | A    | A | CAA                            | Weak                                 |
| <i>XRCC1</i>     | rs3213403(A>G)                                   | All       | G vs A                  | 3                | 511/751        | 0.98(0.72-1.33)                | 0.880   | 2.19  | 0.335              | 9     | 1.000  | C                                       | A    | A | CAA                            | Weak                                 |
| <i>XRCC1</i>     | rs3547(p.Gln632Gln,c.1896G>A)                    | All       | A vs G                  | 5                | 881/1201       | 1.00(0.86-1.17)                | 0.991   | 1.17  | 0.884              | 0     | 0.806  | C                                       | A    | A | CAA                            | Weak                                 |
| <i>XRCC2</i>     | rs3218536(p.Arg188His,c.563G>A)                  | Caucasian | A vs G                  | 3                | 645/1373       | 1.23(0.54-2.77)                | 0.625   | 16.79 | 0.000              | 88    | 1.000  | A                                       | C    | C | ACC                            | Weak                                 |
| <i>XRCC3</i>     | rs1799796(17893A>G,IVS5-14)                      | All       | G vs A                  | 5                | 1478/3040      | 1.02(0.92-1.12)                | 0.756   | 3.45  | 0.486              | 0     | 0.806  | C                                       | A    | A | CAA                            | Weak                                 |

Ins=insertion; Del=deletion; NA=Not Applicable.

<sup>a</sup> Allelic contrast (minor alleles vs major alleles) used in meta-analysis

<sup>b</sup> Summary ORs were calculated based on the DerSimonian-Lairs random-effects model

<sup>c</sup> P-value of heterogeneity between studies based on the Q statistic across crudes OR calculated for each enrolled study

<sup>d</sup> Evaluation of the evidence for the non-significant associations based on three aspects: statistical power, the degree of heterogeneity across studies, and potential bias assessment. Assessment of each aspect was assigned three levels (A, B, or C).

Statistical power, calculated by using SNP tools (see Methods in manuscript), was graded as A (Power $\geq$ 90%), B (Power between 80% and 90%), or C (Power<80%). Replication, depending on the degree of heterogeneity across studies, was graded as A (I<sup>2</sup><25%), B (I<sup>2</sup> between 25% and 50%), or C (I<sup>2</sup>>50%). Bias, considering various potential sources of bias in meta-analysis, was graded as A when there was no demonstrable bias and bias was unlikely after the direction of summary ORs of non-significant associations, was graded as B when there was insufficient information for identifying evidence (i.e. missing information for evaluating Hardy-Weinberg equilibrium (HWE) among controls in an individual study) although there was no obvious bias, and graded as C when the bias was evident and/or was likely to explain the presence of non-significant association. For the C grade of assessment for potential bias, it was assigned if a meta-analysis had any of the following potential sources of bias: (1) the association became statistically significant after excluding studies that showed HWE deviation in controls; (2) potential small study effect (modified Egger's test, p<0.10); (3) possible existence of an excess of significant findings (excess significance test, p<0.10); (4) potential publication bias (Begg's test, p<0.10).

<sup>e</sup> Grade of evidence based on three aspects, including the evaluations of statistical power, replication of evidence, and potential bias.

<sup>f</sup> Credibility of evidence for non-significant association based on the ratings of evidence with three aspects, and was categorized as strong (all three aspect grades were A), moderate (any grade was B, but not C) or weak (any grade was C).

## Supplementary literatures

Lists of 1,018 eligible studies enrolled in this comprehensive research synopsis (pp 77-133)

1. Zupa A, *et al.* GSTM1 and NAT2 polymorphisms and colon, lung and bladder cancer risk: a case-control study. *Anticancer Res* **29**, 1709-1714 (2009).
2. Zu Y, *et al.* Genetic variation in a miR-335 binding site in BIRC5 alters susceptibility to lung cancer in Chinese Han populations. *Biochem Biophys Res Commun* **430**, 529-534 (2013).
3. Zienolddiny S, *et al.* The TERT-CLPTM1L lung cancer susceptibility variant associates with higher DNA adduct formation in the lung. *Carcinogenesis* **30**, 1368-1371 (2009).
4. Zienolddiny S, Ryberg D, Maggini V, Skaug V, Canzian F, Haugen A. Polymorphisms of the interleukin-1 beta gene are associated with increased risk of non-small cell lung cancer. *Int J Cancer* **109**, 353-356 (2004).
5. Zienolddiny S, *et al.* A comprehensive analysis of phase I and phase II metabolism gene polymorphisms and risk of non-small cell lung cancer in smokers. *Carcinogenesis* **29**, 1164-1169 (2008).
6. Zienolddiny S, *et al.* Polymorphisms of DNA repair genes and risk of non-small cell lung cancer. *Carcinogenesis* **27**, 560-567 (2006).
7. Zhu Y, Spitz MR, Lei L, Mills GB, Wu X. A single nucleotide polymorphism in the matrix metalloproteinase-1 promoter enhances lung cancer susceptibility. *Cancer Res* **61**, 7825-7829 (2001).
8. Zhu X, Fan W, Li D. Intronic boundary mutation rs430397 cannot affect alternate splicing and is an indecisive risk factor for non-small cell lung cancer. *Chest* **142**, 1691-1692 (2012).
9. Zhou Y, *et al.* Functional haplotypes in the promoter of matrix metalloproteinase-2 and lung cancer susceptibility. *Carcinogenesis* **26**, 1117-1121 (2005).
10. Zhou W, *et al.* Gene-smoking interaction associations for the ERCC1 polymorphisms in the risk of lung cancer. *Cancer Epidemiol Biomarkers Prev* **14**, 491-496 (2005).
11. Zhou W, *et al.* Polymorphisms in the DNA repair genes XRCC1 and ERCC2, smoking, and lung cancer risk. *Cancer Epidemiol Biomarkers Prev* **12**, 359-365 (2003).
12. Zhou W, *et al.* Gene-environment interaction for the ERCC2 polymorphisms and cumulative cigarette smoking exposure in lung cancer. *Cancer Res* **62**, 1377-1381 (2002).
13. Zhou M, Wan HY, Gao BL, Ding YJ, Jun RX. Genetic polymorphisms of XPD and CDA and lung cancer risk. *Oncol Lett* **4**, 247-251 (2012).
14. Zhong S, *et al.* Glutathione S-transferase mu locus: use of genotyping and phenotyping assays to assess association with lung cancer susceptibility. *Carcinogenesis* **12**, 1533-1537 (1991).
15. Zhong R, *et al.* Genetic variations in TERT-CLPTM1L locus are associated with risk of lung cancer in Chinese population. *Mol Carcinog* **52 Suppl 1**, E118-126 (2013).
16. Zheng Y, *et al.* GPC5 rs2352028 polymorphism and risk of lung cancer in Han Chinese. *Cancer Invest* **30**, 13-19 (2012).
17. Zheng X, *et al.* Functionally significant nicotine acetylcholine receptor subunit

- alpha5 promoter haplotypes are associated with susceptibility to lung cancer in Chinese. *Cancer* **117**, 4714-4723 (2011).
18. Zheng MF, Ji Y, Wu XB, Ye SG, Chen JY. EphB4 gene polymorphism and protein expression in non-small-cell lung cancer. *Mol Med Rep* **6**, 405-408 (2012).
  19. Zheng J, *et al.* Functional genetic variations in the IL-23 receptor gene are associated with risk of breast, lung and nasopharyngeal cancer in Chinese populations. *Carcinogenesis* **33**, 2409-2416 (2012).
  20. Zhao Z, *et al.* Significant association of 5p15.33 (TERT-CLPTM1L genes) with lung cancer in Chinese Han population. *Exp Lung Res* **39**, 91-98 (2013).
  21. Zhao MM, *et al.* Genetic variations in TERT-CLPTM1L genes and risk of lung cancer in a Chinese population. *Asian Pac J Cancer Prev* **15**, 2809-2813 (2014).
  22. Zhao H, Spitz MR, Gwyn KM, Wu X. Microsomal epoxide hydrolase polymorphisms and lung cancer risk in non-Hispanic whites. *Mol Carcinog* **33**, 99-104 (2002).
  23. Zhao B, *et al.* Dietary isothiocyanates, glutathione S-transferase -M1, -T1 polymorphisms and lung cancer risk among Chinese women in Singapore. *Cancer Epidemiol Biomarkers Prev* **10**, 1063-1067 (2001).
  24. Zhang Z, Yu D, Yuan J, Guo Y, Wang H, Zhang X. Cigarette smoking strongly modifies the association of complement factor H variant and the risk of lung cancer. *Cancer Epidemiol* **36**, e111-115 (2012).
  25. Zhang Z, *et al.* Genetic variants in MUC4 gene are associated with lung cancer risk in a Chinese population. *PLoS One* **8**, e77723 (2013).
  26. Zhang YH, *et al.* Polymorphism rs7214723 in CAMKK1 and lung cancer risk in Chinese population. *Tumour Biol* **34**, 3147-3152 (2013).
  27. Zhang Y, *et al.* Genetic polymorphisms of TERT and CLPTM1L and risk of lung cancer: A case-control study in northeast Chinese male population. *Med Oncol* **31**, (2014).
  28. Zhang Y, *et al.* Association between polymorphisms in COMT, PLCH1, and CYP17A1, and non-small-cell lung cancer risk in Chinese nonsmokers. *Clin Lung Cancer* **14**, 45-49 (2013).
  29. Zhang Y, *et al.* Association between C3orf21, TP63 polymorphisms and environment and NSCLC in never-smoking Chinese population. *Gene* **497**, 93-97 (2012).
  30. Zhang X, *et al.* Functional polymorphisms in cell death pathway genes FAS and FASL contribute to risk of lung cancer. *J Med Genet* **42**, 479-484 (2005).
  31. Zhang X, *et al.* Polymorphisms in DNA base excision repair genes ADPRT and XRCC1 and risk of lung cancer. *Cancer Res* **65**, 722-726 (2005).
  32. Zhang X, *et al.* Genetic polymorphisms in cell cycle regulatory genes MDM2 and TP53 are associated with susceptibility to lung cancer. *Hum Mutat* **27**, 110-117 (2006).
  33. Zhang X, Li X, Wu Z, Lin F, Zhou H. The p73 G4C14-to-A4T14 polymorphism is associated with risk of lung cancer in the Han nationality of North China. *Mol Carcinog* **52**, 387-391 (2013).
  34. Zhang X, *et al.* Polymorphisms on 8q24 are associated with lung cancer risk and survival in Han Chinese. *PLoS One* **7**, e41930 (2012).
  35. Zhang W, Weissfeld JL, Romkes M, Land SR, Grandis JR, Siegfried JM. Association of the EGFR intron 1 CA repeat length with lung cancer risk. *Mol Carcinog* **46**, 372-380 (2007).
  36. Zhang W, *et al.* Mutation and polymorphism in the EGFR-TK domain associated

- with lung cancer. *J Thorac Oncol* **1**, 635-647 (2006).
37. Zhang S, *et al.* A variant in the CHEK2 promoter at a methylation site relieves transcriptional repression and confers reduced risk of lung cancer. *Carcinogenesis* **31**, 1251-1258 (2010).
  38. Zhang S, *et al.* REV3L 3'UTR 460 T>C polymorphism in microRNA target sites contributes to lung cancer susceptibility. *Oncogene* **32**, 242-250 (2013).
  39. Zhang M, *et al.* Candidate variants at 6p21.33 and 6p22.1 and risk of non-small cell lung cancer in a Chinese population. *Int J Mol Epidemiol Genet* **1**, 11-18 (2010).
  40. Zhang J, *et al.* CYP19A1 gene polymorphisms and risk of lung cancer. *J Int Med Res* **41**, 735-742 (2013).
  41. Zhang J, *et al.* The functional polymorphism in the matrix metalloproteinase-7 promoter increases susceptibility to esophageal squamous cell carcinoma, gastric cardiac adenocarcinoma and non-small cell lung carcinoma. *Carcinogenesis* **26**, 1748-1753 (2005).
  42. Zhang HT, *et al.* Mutational analysis of the transforming growth factor beta receptor type I gene in primary non-small cell lung cancer. *Lung Cancer* **40**, 281-287 (2003).
  43. Zhang H, *et al.* Common genetic variants in 53BP1 associated with nonsmall-cell lung cancer risk in Han Chinese. *Arch Med Res* **45**, 84-89 (2014).
  44. Zhai R, *et al.* Vascular endothelial growth factor genotypes, haplotypes, gender, and the risk of non-small cell lung cancer. *Clin Cancer Res* **14**, 612-617 (2008).
  45. Zejnilovic J, Akev N, Yilmaz H, Isbir T. Association between manganese superoxide dismutase polymorphism and risk of lung cancer. *Cancer Genet Cytogenet* **189**, 1-4 (2009).
  46. Zambon L, Honma HN, Lourenco GJ, Saad IA, Mussi RK, Lima CS. A polymorphism in the angiogenesis inhibitor, endostatin, in lung cancer susceptibility. *Lung Cancer* **59**, 276-278 (2008).
  47. Yu X, Rao J, Lin J, Zhang Z, Cao L, Zhang X. Tag SNPs in complement receptor-1 contribute to the susceptibility to non-small cell lung cancer. *Mol Cancer* **13**, 56 (2014).
  48. Yu P, Liu YP, Zhang JD, Qu XJ, Jin B, Zhang Y. Correlation between PARP-1 Val762Ala polymorphism and the risk of lung cancer in a Chinese population. *Tumour Biol*, (2014).
  49. Yu D, *et al.* Characterization of functional excision repair cross-complementation group 1 variants and their association with lung cancer risk and prognosis. *Clin Cancer Res* **14**, 2878-2886 (2008).
  50. Yu C, *et al.* Correlation between a single nucleotide polymorphism in the matrix metalloproteinase-2 promoter and risk of lung cancer. *Cancer Res* **62**, 6430-6433 (2002).
  51. Young RP, Hopkins RJ, Whittington CF, Hay BA, Epton MJ, Gamble GD. Individual and cumulative effects of GWAS susceptibility loci in lung cancer: associations after sub-phenotyping for COPD. *PLoS One* **6**, e16476 (2011).
  52. Young RP, Hopkins RJ, Hay BA, Whittington CF, Epton MJ, Gamble GD. FAM13A locus in COPD is independently associated with lung cancer - Evidence of a molecular genetic link between COPD and lung cancer. *Appl Clin Genet* **4**, 1-10 (2011).
  53. Young RP, Hopkins RJ, Hay BA, Gamble GD. GSTM1 null genotype in COPD and lung cancer: Evidence of a modifier or confounding effect? *Appl Clin Genet* **4**, 137-144 (2011).

54. Young RP, *et al.* A gene-based risk score for lung cancer susceptibility in smokers and ex-smokers. *Postgrad Med J* **85**, 515-524 (2009).
55. Young RP, Hopkins RJ, Hay BA, Epton MJ, Black PN, Gamble GD. Lung cancer gene associated with COPD: triple whammy or possible confounding effect? *Eur Respir J* **32**, 1158-1164 (2008).
56. You W, *et al.* No association between TGFBR1\*6A and lung cancer. *J Thorac Oncol* **2**, 657-659 (2007).
57. Yoshida K, *et al.* Lung cancer susceptibility among atomic bomb survivors in relation to CA repeat number polymorphism of epidermal growth factor receptor gene and radiation dose. *Carcinogenesis* **30**, 2037-2041 (2009).
58. Yoon KA, *et al.* Genetic polymorphisms in the Rb-binding zinc finger gene RIZ and the risk of lung cancer. *Carcinogenesis* **28**, 1971-1977 (2007).
59. Yoon KA, Kim JH, Gil HJ, Hwang H, Hwangbo B, Lee JS. CYP1B1, CYP1A1, MPO, and GSTP1 polymorphisms and lung cancer risk in never-smoking Korean women. *Lung Cancer* **60**, 40-46 (2008).
60. Yoon KA, *et al.* Novel polymorphisms in the SUV39H2 histone methyltransferase and the risk of lung cancer. *Carcinogenesis* **27**, 2217-2222 (2006).
61. Yoon KA, Gil HJ, Han J, Park J, Lee JS. Genetic polymorphisms in the polycomb group gene EZH2 and the risk of lung cancer. *J Thorac Oncol* **5**, 10-16 (2010).
62. Yongjun Zhang M, Zhang A, Hua Shi M, Xiangming Kong M. Association between TGM5, PPAP2B and PSMA4 polymorphisms and NSCLC in never-smoking Chinese population. *J Cancer Res Ther* **9**, 660-663 (2013).
63. Yin ZH, Li MC, Cui ZS, He QC, Zhou BS. Relationship between ERCC2 polymorphism and risk of lung cancer in Chinese nonsmoker. *Chin J Cancer Res* **19**, 184-188 (2007).
64. Yin ZH, *et al.* TP63 gene polymorphisms, cooking oil fume exposure and risk of lung adenocarcinoma in Chinese non-smoking females. *Asian Pac J Cancer Prev* **14**, 6519-6522 (2014).
65. Yin Z, *et al.* ERCC2, ERCC1 polymorphisms and haplotypes, cooking oil fume and lung adenocarcinoma risk in Chinese non-smoking females. *J Exp Clin Cancer Res* **28**, 153 (2009).
66. Yin Z, *et al.* Genetic polymorphisms of TERT and CLPTM1L, cooking oil fume exposure, and risk of lung cancer: A case-control study in a Chinese non-smoking female population. *Med Oncol* **31**, (2014).
67. Yin L, Pu Y, Liu TY, Tung YH, Chen KW, Lin P. Genetic polymorphisms of NAD(P)H quinone oxidoreductase, CYP1A1 and microsomal epoxide hydrolase and lung cancer risk in Nanjing, China. *Lung Cancer* **33**, 133-141 (2001).
68. Yin JY, Han LF, Huang Q, Xu XJ, Zhou HH, Liu ZQ. ABCC1 polymorphism Arg723Gln (2168G> A) is associated with lung cancer susceptibility in a Chinese population. *Clin Exp Pharmacol Physiol* **38**, 632-637 (2011).
69. Yin J, *et al.* HapMap-based study identifies risk sub-region on chromosome 19q13.3 in relation to lung cancer among Chinese. *Cancer Epidemiol* **37**, 923-929 (2013).
70. Yin J, *et al.* Hapmap-based evaluation of ERCC2, PPP1R13L, and ERCC1 and lung cancer risk in a Chinese population. *Environ Mol Mutagen* **53**, 239-245 (2012).
71. Yin J, *et al.* A specific diplotype defined by PPP1R13L rs1970764, CD3EAP rs967591 and ERCC1 rs11615 and lung cancer risk in a Chinese population.



- Lung Cancer* **76**, 286-291 (2012).
72. Yin J, *et al.* HapMap-based study of a region encompassing ERCC1 and ERCC2 related to lung cancer susceptibility in a Chinese population. *Mutat Res* **713**, 1-7 (2011).
  73. Yin J, Vogel U, Ma Y, Qi R, Wang H. HapMap-based study of the DNA repair gene ERCC2 and lung cancer susceptibility in a Chinese population. *Carcinogenesis* **30**, 1181-1185 (2009).
  74. Yin J, Vogel U, Ma Y, Qi R, Wang H. Haplotypes of nine single nucleotide polymorphisms on chromosome 19q13.2-3 associated with susceptibility of lung cancer in a Chinese population. *Mutat Res* **641**, 12-18 (2008).
  75. Yin J, Vogel U, Ma Y, Qi R, Sun Z, Wang H. A haplotype encompassing the variant allele of DNA repair gene polymorphism ERCC2/XPD Lys751Gln but not the variant allele of Asp312Asn is associated with risk of lung cancer in a northeastern Chinese population. *Cancer Genet Cytogenet* **175**, 47-51 (2007).
  76. Yin J, Vogel U, Ma Y, Qi R, Sun Z, Wang H. The DNA repair gene XRCC1 and genetic susceptibility of lung cancer in a northeastern Chinese population. *Lung Cancer* **56**, 153-160 (2007).
  77. Yin J, *et al.* Effects of PPP1R13L and CD3EAP variants on lung cancer susceptibility among nonsmoking Chinese women. *Gene* **524**, 228-231 (2013).
  78. Yeh KT, Chen JC, Chen CM, Wang YF, Lee TP, Chang JG. CYP3A5\*1 is an inhibitory factor for lung cancer in Taiwanese. *Kaohsiung J Med Sci* **19**, 201-207 (2003).
  79. Yaren A, Oztop I, Turgut S, Turgut G, Degirmencioglu S, Demirpence M. Angiotensin-converting enzyme gene polymorphism is associated with anemia in non-small-cell lung cancer. *Exp Biol Med* **233**, 32-37 (2008).
  80. Yang XR, *et al.* CYP1A1 and GSTM1 polymorphisms in relation to lung cancer risk in Chinese women. *Cancer Lett* **214**, 197-204 (2004).
  81. Yang S, *et al.* Association of miR-502-binding site single nucleotide polymorphism in the 3'-untranslated region of SET8 and TP53 codon 72 polymorphism with non-small cell lung cancer in Chinese population. *Acta Biochim Biophys Sin* **46**, 149-154 (2014).
  82. Yang R, *et al.* Functional genetic polymorphisms in PP2A subunit genes confer increased risks of lung cancer in southern and eastern Chinese. *PLoS One* **8**, e77285 (2013).
  83. Yang P, *et al.* Alpha1-antitrypsin deficiency carriers, tobacco smoke, chronic obstructive pulmonary disease, and lung cancer risk. *Arch Intern Med* **168**, 1097-1103 (2008).
  84. Yang P, *et al.* Alpha1-antitrypsin and neutrophil elastase imbalance and lung cancer risk. *Chest* **128**, 445-452 (2005).
  85. Yang P, Bamlet WR, Ebbert JO, Taylor WR, de Andrade M. Glutathione pathway genes and lung cancer risk in young and old populations. *Carcinogenesis* **25**, 1935-1944 (2004).
  86. Yang M, *et al.* Functional FEN1 polymorphisms are associated with DNA damage levels and lung cancer risk. *Hum Mutat* **30**, 1320-1328 (2009).
  87. Yang M, Choi Y, Hwangbo B, Lee JS. Combined effects of genetic polymorphisms in six selected genes on lung cancer susceptibility. *Lung Cancer* **57**, 135-142 (2007).
  88. Yang L, *et al.* Effects of a functional variant c.353T>C in snail on risk of two contextual diseases. Chronic obstructive pulmonary disease and lung cancer. *Am J Respir Crit Care Med* **189**, 139-148 (2014).

89. Yang L, Shi GL, Song CX, Xu SF. Relationship between genetic polymorphism of MCP-1 and non-small-cell lung cancer in the Han nationality of North China. *Genet Mol Res* **9**, 765-771 (2010).
90. Yang L, *et al.* Functional polymorphisms of CHRNA3 predict risks of chronic obstructive pulmonary disease and lung cancer in Chinese. *PLoS One* **7**, e46071 (2012).
91. Yang L, *et al.* A functional copy number variation in the WWOX gene is associated with lung cancer risk in Chinese. *Hum Mol Genet* **22**, 1886-1894 (2013).
92. Yang L, *et al.* A common genetic variant (97906C>A) of DAB2IP/AIP1 is associated with an increased risk and early onset of lung cancer in Chinese males. *PLoS One* **6**, e26944 (2011).
93. Yang L, *et al.* A functional polymorphism at microRNA-629-binding site in the 3'-untranslated region of NBS1 gene confers an increased risk of lung cancer in Southern and Eastern Chinese population. *Carcinogenesis* **33**, 338-347 (2012).
94. Yang J, Lan H, Huang X, Liu B, Tong Y. MicroRNA-126 inhibits tumor cell growth and its expression level correlates with poor survival in non-small cell lung cancer patients. *PLoS One* **7**, e42978 (2012).
95. Yang H, Spitz MR, Stewart DJ, Lu C, Gorlov IP, Wu X. ATM sequence variants associate with susceptibility to non-small cell lung cancer. *Int J Cancer* **121**, 2254-2259 (2007).
96. Yan F, Xu JF, Liu XF, Li XH. Interaction between smoking and CYP2C19\*3 polymorphism increased risk of lung cancer in a Chinese population. *Tumour Biol* **35**, 5295-5298 (2014).
97. Yadav DS, *et al.* Polymorphisms of glutathione-S-transferase genes and the risk of aerodigestive tract cancers in the Northeast Indian population. *Genet Test Mol Biomarkers* **14**, 715-723 (2010).
98. Xue X, *et al.* The joint effect of hOGG1, APE1, and ADPRT polymorphisms and cooking oil fumes on the risk of lung adenocarcinoma in Chinese non-smoking females. *PLoS One* **8**, e71157 (2013).
99. Xu X, Kelsey KT, Wiencke JK, Wain JC, Christiani DC. Cytochrome P450 CYP1A1 MspI polymorphism and lung cancer susceptibility. *Cancer Epidemiol Biomarkers Prev* **5**, 687-692 (1996).
100. Xu P, *et al.* Genetic Variation in BCL2 3'-UTR Was Associated with Lung Cancer Risk and Prognosis in Male Chinese Population. *PLoS One* **8**, (2013).
101. Xu M, *et al.* Serum C-reactive protein and risk of lung cancer: a case-control study. *Med Oncol* **30**, 319 (2013).
102. Xu LL, *et al.* Counterpoint: the myeloperoxidase -463G-->a polymorphism does not decrease lung cancer susceptibility in Caucasians. *Cancer Epidemiol Biomarkers Prev* **11**, 1555-1559 (2002).
103. Xu HL, *et al.* Effects of polymorphisms in translesion DNA synthesis genes on lung cancer risk and prognosis in Chinese men. *Cancer Epidemiol* **37**, 917-922 (2013).
104. Xing D, Tan W, Wei Q, Lin D. Polymorphisms of the DNA repair gene XPD and risk of lung cancer in a Chinese population. *Lung Cancer* **38**, 123-129 (2002).
105. Xie C, *et al.* Sipal promoter polymorphism predicts risk and metastasis of lung cancer in Chinese. *Mol Carcinog* **52 Suppl 1**, E110-117 (2013).
106. Xiao Q, *et al.* 9q33.3, A stress-related chromosome region, contributes to reducing lung squamous cell carcinoma risk. *J Thorac Oncol* **9**, 1041-1047 (2014).

107. Xiao G, Zhang T, Yao J, Ren J, Cao W, Wu G. The association between RASSF1 gene polymorphisms and lung cancer susceptibility among people in Hubei Province of China. *J Huazhong Univ Sci Technolog Med Sci* **29**, 646-649 (2009).
108. Wu X, *et al.* XPA polymorphism associated with reduced lung cancer risk and a modulating effect on nucleotide excision repair capacity. *Carcinogenesis* **24**, 505-509 (2003).
109. Wu X, *et al.* p53 Genotypes and Haplotypes Associated With Lung Cancer Susceptibility and Ethnicity. *J Natl Cancer Inst* **94**, 681-690 (2002).
110. Wu X, *et al.* Associations between cytochrome P4502E1 genotype, mutagen sensitivity, cigarette smoking and susceptibility to lung cancer. *Carcinogenesis* **18**, 967-973 (1997).
111. Wu X, Hudmon KS, Detry MA, Chamberlain RM, Spitz MR. D2 dopamine receptor gene polymorphisms among African-Americans and Mexican-Americans: a lung cancer case-control study. *Cancer Epidemiol Biomarkers Prev* **9**, 1021-1026 (2000).
112. Wu X, Gwyn K, Amos CI, Makan N, Hong WK, Spitz MR. The association of microsomal epoxide hydrolase polymorphisms and lung cancer risk in African-Americans and Mexican-Americans. *Carcinogenesis* **22**, 923-928 (2001).
113. Wu X, *et al.* Cytochrome P450 2E1 DraI polymorphisms in lung cancer in minority populations. *Cancer Epidemiol Biomarkers Prev* **7**, 13-18 (1998).
114. Wu W, *et al.* Genetic variants in GTF2H1 and risk of lung cancer: a case-control analysis in a Chinese population. *Lung Cancer* **63**, 180-186 (2009).
115. Wu MF, *et al.* Increased expression of cytochrome P4501B1 in peripheral leukocytes from lung cancer patients. *Toxicol Lett* **150**, 211-219 (2004).
116. Wu KS, Zhou X, Zheng F, Xu XQ, Lin YH, Yang J. Influence of interleukin-1 beta genetic polymorphism, smoking and alcohol drinking on the risk of non-small cell lung cancer. *Clin Chim Acta* **411**, 1441-1446 (2010).
117. Wu H, *et al.* Association between the telomerase reverse transcriptase (TERT) rs2736098 polymorphism and cancer risk: evidence from a case-control study of non-small-cell lung cancer and a meta-analysis. *PLoS One* **8**, e76372 (2013).
118. Wu C, *et al.* Genetic variants on chromosome 15q25 associated with lung cancer risk in Chinese populations. *Cancer Res* **69**, 5065-5072 (2009).
119. Wright CM, *et al.* Genetic association study of CYP1A1 polymorphisms identifies risk haplotypes in nonsmall cell lung cancer. *Eur Respir J* **35**, 152-159 (2010).
120. Woodson K, *et al.* Effect of vitamin intervention on the relationship between GSTM1, smoking, and lung cancer risk among male smokers. *Cancer Epidemiol Biomarkers Prev* **8**, 965-970 (1999).
121. Wolf CR, *et al.* Relationship between the debrisoquine hydroxylase polymorphism and cancer susceptibility. *Carcinogenesis* **13**, 1035-1038 (1992).
122. Wojas-Krawczyk K, *et al.* CYP1A1, GSTT1, and GSTM1 polymorphisms and lung cancer in eastern Poland. *Adv Clin Exp Med* **18**, 461-471 (2009).
123. Wikman H, *et al.* Relevance of N-acetyltransferase 1 and 2 (NAT1, NAT2) genetic polymorphisms in non-small cell lung cancer susceptibility. *Pharmacogenetics* **11**, 157-168 (2001).
124. Wikman H, *et al.* hOGG1 polymorphism and loss of heterozygosity (LOH): significance for lung cancer susceptibility in a caucasian population. *Int J Cancer* **88**, 932-937 (2000).
125. Wiencke JK, Spitz MR, McMillan A, Kelsey KT. Lung cancer in

- Mexican-Americans and African-Americans is associated with the wild-type genotype of the NAD(P)H: quinone oxidoreductase polymorphism. *Cancer Epidemiol Biomarkers Prev* **6**, 87-92 (1997).
126. Weston A, *et al.* Allelic frequency of a p53 polymorphism in human lung cancer. *Cancer Epidemiol Biomarkers Prev* **1**, 481-483 (1992).
  127. Weston A, *et al.* Determination of the allelic frequencies of an L-myc and a p53 polymorphism in human lung cancer. *Carcinogenesis* **15**, 583-587 (1994).
  128. Weston A, *et al.* Relationship of H-ras-1, L-myc, and p53 polymorphisms with lung cancer risk and prognosis. *Environ Health Perspect* **98**, 61-67 (1992).
  129. Wei C, *et al.* A case-control study of a sex-specific association between a 15q25 variant and lung cancer risk. *Cancer Epidemiol Biomarkers Prev* **20**, 2603-2609 (2011).
  130. Wauters E, *et al.* The TERT-CLPTM1L locus for lung cancer predisposes to bronchial obstruction and emphysema. *Eur Respir J* **38**, 924-931 (2011).
  131. Watanabe J, *et al.* An Rsa I polymorphism in the CYP2E1 gene does not affect lung cancer risk in a Japanese population. *Jpn J Cancer Res* **86**, 245-248 (1995).
  132. Watanabe J, *et al.* Association of CYP1B1 genetic polymorphism with incidence to breast and lung cancer. *Pharmacogenetics* **10**, 25-33 (2000).
  133. Wassenaar CA, Dong Q, Wei Q, Amos CI, Spitz MR, Tyndale RF. Relationship between CYP2A6 and CHRNA5-CHRNA3-CHRNA4 variation and smoking behaviors and lung cancer risk. *J Natl Cancer Inst* **103**, 1342-1346 (2011).
  134. Wassenaar CA, Dong Q, Amos CI, Spitz MR, Tyndale RF. Pilot study of CYP2B6 genetic variation to explore the contribution of nitrosamine activation to lung carcinogenesis. *Int J Mol Sci* **14**, 8381-8392 (2013).
  135. Wang YC, Chen CY, Chen SK, Chang YY, Lin P. p53 codon 72 polymorphism in Taiwanese lung cancer patients: association with lung cancer susceptibility and prognosis. *Clin Cancer Res* **5**, 129-134 (1999).
  136. Wang Y, Zhou F, Wu Y, Xu D, Li W, Liang S. The relationship between three heat shock protein 70 gene polymorphisms and susceptibility to lung cancer. *Clin Chem Lab Med* **48**, 1657-1663 (2010).
  137. Wang Y, Zhang Y, Gu C, Bao W, Bao Y. Neuronal acetylcholine receptor subunit alpha-9 (CHRNA9) polymorphisms are associated with NSCLC risk in a Chinese population. *Med Oncol* **31**, 932 (2014).
  138. Wang Y, Spitz MR, Tsou AM, Zhang K, Maman N, Wu X. Sulfotransferase (SULT) 1A1 polymorphism as a predisposition factor for lung cancer: a case-control analysis. *Lung Cancer* **35**, 137-142 (2002).
  139. Wang Y, Spitz MR, Schabath MB, Ali-Osman F, Mata H, Wu X. Association between glutathione S-transferase p1 polymorphisms and lung cancer risk in Caucasians: a case-control study. *Lung Cancer* **40**, 25-32 (2003).
  140. Wang Y, *et al.* XRCC3 genetic polymorphism, smoking, and lung carcinoma risk in minority populations. *Cancer* **98**, 1701-1706 (2003).
  141. Wang Y, *et al.* No association between the C-1562T polymorphism in the promoter of matrix metalloproteinase-9 gene and non-small cell lung carcinoma. *Lung Cancer* **49**, 155-161 (2005).
  142. Wang Y, Broderick P, Matakidou A, Vijaykrishnan J, Eisen T, Houlston RS. Variation in TP63 is associated with lung adenocarcinoma in the UK population. *Cancer Epidemiol Biomarkers Prev* **20**, 1453-1462 (2011).
  143. Wang Y, Broderick P, Matakidou A, Eisen T, Houlston RS. Chromosome 15q25 (CHRNA3-CHRNA5) variation impacts indirectly on lung cancer risk. *PLoS One* **6**, e19085 (2011).

144. Wang Y, Broderick P, Matakidou A, Eisen T, Houlston RS. Role of 5p15.33 (TERT-CLPTM1L), 6p21.33 and 15q25.1 (CHRNA5-CHRNA3) variation and lung cancer risk in never-smokers. *Carcinogenesis* **31**, 234-238 (2010).
145. Wang X, *et al.* Cancer stem cell marker Musashi-1 rs2522137 genotype is associated with an increased risk of lung cancer. *PLoS One* **9**, e95915 (2014).
146. Wang X, *et al.* RAGE genetic polymorphisms are associated with risk, chemotherapy response and prognosis in patients with advanced NSCLC. *PLoS One* **7**, e43734 (2012).
147. Wang W, Spitz MR, Yang H, Lu C, Stewart DJ, Wu X. Genetic variants in cell cycle control pathway confer susceptibility to lung cancer. *Clin Cancer Res* **13**, 5974-5981 (2007).
148. Wang SL, Lee H, Chen KW, Tsai KJ, Chen CY, Lin P. Cytochrome P4502E1 genetic polymorphisms and lung cancer in a Taiwanese population. *Lung Cancer* **26**, 27-34 (1999).
149. Wang M, *et al.* Identification of a novel tumor suppressor gene p34 on human chromosome 6q25.1. *Cancer Res* **67**, 93-99 (2007).
150. Wang LI, *et al.* Manganese superoxide dismutase alanine-to-valine polymorphism at codon 16 and lung cancer risk. *J Natl Cancer Inst* **93**, 1818-1821 (2001).
151. Wang LI, Giovannucci EL, Hunter D, Neubergh D, Su L, Christiani DC. Dietary intake of Cruciferous vegetables, Glutathione S-transferase (GST) polymorphisms and lung cancer risk in a Caucasian population. *Cancer Causes Control* **15**, 977-985 (2004).
152. Wang LE, Cheng L, Spitz MR, Wei Q. Fas A670G polymorphism, apoptotic capacity in lymphocyte cultures, and risk of lung cancer. *Lung Cancer* **42**, 1-8 (2003).
153. Wang L, Lu J, An J, Shi Q, Spitz MR, Wei Q. Polymorphisms of cytosolic serine hydroxymethyltransferase and risk of lung cancer: a case-control analysis. *Lung Cancer* **57**, 143-151 (2007).
154. Wang L, Liu H, Zhang Z, Spitz MR, Wei Q. Association of genetic variants of O6-methylguanine-DNA methyltransferase with risk of lung cancer in non-Hispanic Whites. *Cancer Epidemiol Biomarkers Prev* **15**, 2364-2369 (2006).
155. Wang L, *et al.* The association of c.1471G>A genetic polymorphism in XRCC1 gene with lung cancer susceptibility in Chinese Han population. *Tumour Biol* **35**, 5389-5393 (2014).
156. Wang J, *et al.* Association of GSTM1, CYP1A1 and CYP2E1 genetic polymorphism with susceptibility to lung adenocarcinoma: A case-control study in Chinese population. *Cancer Sci* **94**, 448-452 (2003).
157. Wang J, Deng Y, Cheng J, Ding J, Tokudome S. GST genetic polymorphisms and lung adenocarcinoma susceptibility in a Chinese population. *Cancer Lett* **201**, 185-193 (2003).
158. Wang HT, *et al.* PARP-1 rs3219073 polymorphism may contribute to susceptibility to lung cancer. *Genet Test Mol Biomarkers* **18**, 1-5 (2014).
159. Wang H, *et al.* The genetic variant rs401681C/T is associated with the risk of non-small cell lung cancer in a Chinese mainland population. *Genet Mol Res* **12**, 67-73 (2013).
160. Wang H, *et al.* Genetic variant in the 3'-untranslated region of VEGFR1 gene influences chronic obstructive pulmonary disease and lung cancer development in Chinese population. *Mutagenesis* **29**, 311-317 (2014).
161. Wang H, *et al.* Substantial reduction in risk of lung adenocarcinoma associated

- with genetic polymorphism in CYP2A13, the most active cytochrome P450 for the metabolic activation of tobacco-specific carcinogen NNK. *Cancer Res* **63**, 8057-8061 (2003).
162. Wang H, Li L, Ding L, Zhang Z, Pu C. Association of genetic polymorphisms in the paraoxonase 1 gene with the risk and prognosis of non-small cell lung cancer in Chinese Han population. *J Investig Med* **60**, 592-597 (2012).
  163. Wang H, *et al.* Genetic susceptibility of lung cancer associated with common variants in the 3' untranslated regions of the adenosine triphosphate-binding cassette B1 (ABCB1) and ABCC1 candidate transporter genes for carcinogen export. *Cancer* **115**, 595-607 (2009).
  164. Wang H, *et al.* Beta-2 adrenergic receptor gene (ADRB2) polymorphism and risk for lung adenocarcinoma: a case-control study in a Chinese population. *Cancer Lett* **240**, 297-305 (2006).
  165. Wang F, *et al.* TERT rs2736100T/G polymorphism upregulates interleukin 6 expression in non-small cell lung cancer especially in adenocarcinoma. *Tumour Biol* **35**, 4667-4672 (2014).
  166. Walsh KM, *et al.* Fine-mapping of the 5p15.33, 6p22.1-p21.31, and 15q25.1 regions identifies functional and histology-specific lung cancer susceptibility loci in African-Americans. *Cancer Epidemiol Biomarkers Prev* **22**, 251-260 (2013).
  167. Walsh KM, *et al.* Association study of nicotinic acetylcholine receptor genes identifies a novel lung cancer susceptibility locus near CHRNA1 in African-Americans. *Oncotarget* **3**, 1428-1438 (2012).
  168. Voho A, *et al.* EPHX1 gene polymorphisms and individual susceptibility to lung cancer. *Cancer Lett* **237**, 102-108 (2006).
  169. Vogel U, Overvad K, Wallin H, Tjonneland A, Nexo BA, Raaschou-Nielsen O. Combinations of polymorphisms in XPD, XPC and XPA in relation to risk of lung cancer. *Cancer Lett* **222**, 67-74 (2005).
  170. Vogel U, Nexo BA, Wallin H, Overvad K, Tjonneland A, Raaschou-Nielsen O. No association between base excision repair gene polymorphisms and risk of lung cancer. *Biochem Genet* **42**, 453-460 (2004).
  171. Vogel U, *et al.* Two regions in chromosome 19q13.2-3 are associated with risk of lung cancer. *Mutat Res* **546**, 65-74 (2004).
  172. Vogel U, *et al.* Polymorphisms in genes involved in the inflammatory response and interaction with NSAID use or smoking in relation to lung cancer risk in a prospective study. *Mutat Res* **639**, 89-100 (2008).
  173. Vineis P, *et al.* Genetic susceptibility according to three metabolic pathways in cancers of the lung and bladder and in myeloid leukemias in nonsmokers. *Ann Oncol* **18**, 1230-1242 (2007).
  174. Vinci S, *et al.* Genetic variants in miR-146a, miR-149, miR-196a2, miR-499 and their influence on relative expression in lung cancers. *Clin Chem Lab Med* **49**, 2073-2080 (2011).
  175. van der Knaap R, Siemes C, Coebergh JW, van Duijn CM, Hofman A, Stricker BH. Renin-angiotensin system inhibitors, angiotensin I-converting enzyme gene insertion/deletion polymorphism, and cancer: the Rotterdam Study. *Cancer* **112**, 748-757 (2008).
  176. Unsal M, Kara N, Karakus N, Tural S, Elbistan M. Effects of leptin and leptin receptor gene polymorphisms on lung cancer. *Tumour Biol* **35**, 10231-10236 (2014).
  177. Ulybina YM, *et al.* Coding polymorphisms in Casp5, Casp8 and DR4 genes may play a role in predisposition to lung cancer. *Cancer Lett* **278**, 183-191 (2009).

178. Uematsu F, *et al.* Restriction fragment length polymorphism of the human CYP2E1 (cytochrome P450IIE1) gene and susceptibility to lung cancer: possible relevance to low smoking exposure. *Pharmacogenetics* **4**, 58-63 (1994).
179. Tsuneoka Y, Fukushima K, Matsuo Y, Ichikawa Y, Watanabe Y. Genotype analysis of the CYP2C19 gene in the Japanese population. *Life Sci* **59**, 1711-1715 (1996).
180. Tseng RC, Hsieh FJ, Shih CM, Hsu HS, Chen CY, Wang YC. Lung cancer susceptibility and prognosis associated with polymorphisms in the nonhomologous end-joining pathway genes: a multiple genotype-phenotype study. *Cancer* **115**, 2939-2948 (2009).
181. Tsai YY, *et al.* Genetic susceptibility and dietary patterns in lung cancer. *Lung Cancer* **41**, 269-281 (2003).
182. Tournel G, *et al.* Molecular analysis of the CYP2F1 gene: identification of a frequent non-functional allelic variant. *Mutat Res* **617**, 79-89 (2007).
183. Togo AV, *et al.* L-MYC polymorphism in cancer patients, healthy blood donors and elderly, tumor-free individuals in Russia. *Int J Cancer* **85**, 747-750 (2000).
184. To-Figueras J, *et al.* Polymorphism of glutathione S-transferase M3: Interaction with glutathione S-transferase M1 and lung cancer susceptibility. *Biomarkers* **5**, 73-80 (2000).
185. To-Figueras J, Gene M, Gomez-Catalan J, Pique E, Borrego N, Corbella J. Lung cancer susceptibility in relation to combined polymorphisms of microsomal epoxide hydrolase and glutathione S-transferase P1. *Cancer Lett* **173**, 155-162 (2001).
186. To-Figueras J, *et al.* Genetic polymorphism of glutathione S-transferase P1 gene and lung cancer risk. *Cancer Causes Control* **10**, 65-70 (1999).
187. To-Figueras J, *et al.* Glutathione S-transferase M1 (GSTM1) and T1 (GSTT1) polymorphisms and lung cancer risk among Northwestern Mediterraneans. *Carcinogenesis* **18**, 1529-1533 (1997).
188. To-Figueras J, *et al.* Glutathione-S-Transferase M1 and codon 72 p53 polymorphisms in a northwestern Mediterranean population and their relation to lung cancer susceptibility. *Cancer Epidemiol Biomarkers Prev* **5**, 337-342 (1996).
189. Timofeeva MN, *et al.* Genetic polymorphisms in 15q25 and 19q13 loci, cotinine levels, and risk of lung cancer in EPIC. *Cancer Epidemiol Biomarkers Prev* **20**, 2250-2261 (2011).
190. Timofeeva MN, *et al.* CYP450 polymorphisms as risk factors for early-onset lung cancer: gender-specific differences. *Carcinogenesis* **30**, 1161-1169 (2009).
191. Timofeeva M, *et al.* Genetic polymorphisms of MPO, GSTT1, GSTM1, GSTP1, EPHX1 and NQO1 as risk factors of early-onset lung cancer. *Int J Cancer* **127**, 1547-1561 (2010).
192. Tilak AR, Kumar S, Pant MC, Mathur N, Kumar A. Polymorphism Arg72Pro of p53 confers susceptibility to squamous cell carcinoma of lungs in a North Indian population. *DNA Cell Biol* **32**, 66-72 (2013).
193. Tilak AR, *et al.* Association of functionally important polymorphism of microsomal epoxide hydrolase gene (EPHX1) with lung cancer susceptibility. *Cancer Invest* **29**, 411-418 (2011).
194. Tian T, *et al.* A functional genetic variant in microRNA-196a2 is associated with increased susceptibility of lung cancer in Chinese. *Cancer Epidemiol Biomarkers Prev* **18**, 1183-1187 (2009).
195. Tian F, Zhang Y, Ren Y, Shen L, Wu W, Zhou B. N-Acetyltransferase 2 (NAT2)

- gene polymorphism and exposure to smoking in lung cancer of Chinese males. *Med Oncol* **31**, (2014).
196. Thanopoulou E, *et al.* The single nucleotide polymorphism g.1548A >G (K469E) of the ICAM-1 gene is associated with worse prognosis in non-small cell lung cancer. *Tumour Biol* **33**, 1429-1436 (2012).
  197. Ter-Minassian M, *et al.* Apoptosis gene polymorphisms, age, smoking and the risk of non-small cell lung cancer. *Carcinogenesis* **29**, 2147-2152 (2008).
  198. Tekpli X, Landvik NE, Skaug V, Gulsvik A, Haugen A, Zienolddiny S. Functional effect of polymorphisms in 15q25 locus on CHRNA5 mRNA, bulky DNA adducts and TP53 mutations. *Int J Cancer* **132**, 1811-1820 (2013).
  199. Teixeira AL, *et al.* Influence of TGFBI+869T>C functional polymorphism in non-small cell lung cancer (NSCLC) risk. *J Cancer Res Clin Oncol* **137**, 435-439 (2011).
  200. Tefre T, *et al.* Genotyping of the CYP2D6 gene in Norwegian lung cancer patients and controls. *Pharmacogenetics* **4**, 47-57 (1994).
  201. Tefre T, Borresen AL, Aamdal S, Brogger A. Studies of the L-myc DNA polymorphism and relation to metastasis in Norwegian lung cancer patients. *Br J Cancer* **61**, 809-812 (1990).
  202. Tastemir-Korkmaz D, Demirhan O, Kuleci S, Hasturk S. There is no significant association between death receptor 4 (DR4) gene polymorphisms and lung cancer in Turkish population. *Pathol Oncol Res* **19**, 779-784 (2013).
  203. Taniguchi K, *et al.* Polymorphisms in the promoter region of the neutrophil elastase gene are associated with lung cancer development. *Clin Cancer Res* **8**, 1115-1120 (2002).
  204. Tang J, Zhao J, Zhao J. The relationship between genetic variants of XRCC1 gene and lung cancer susceptibility in Chinese Han population. *Med Oncol* **31**, (2014).
  205. Tang H, *et al.* LAPTM4B polymorphism is associated with non-small cell lung cancer susceptibility and prognosis. *Oncol Rep* **31**, 2454-2460 (2014).
  206. Tang DL, *et al.* Associations between both genetic and environmental biomarkers and lung cancer: evidence of a greater risk of lung cancer in women smokers. *Carcinogenesis* **19**, 1949-1953 (1998).
  207. Tanaka Y, *et al.* Nonsynonymous single nucleotide polymorphisms in DNA damage repair pathways and lung cancer risk. *Cancer* **116**, 896-902 (2010).
  208. Tanaka D, *et al.* Polymorphism of dihydropyrimidine dehydrogenase (DPYD) Cys29Arg and risk of six malignancies in Japanese. *Nagoya J Med Sci* **67**, 117-124 (2005).
  209. Tan XL, Moslehi R, Han W, Spivack SD. Haplotype-tagging single nucleotide polymorphisms in the GSTP1 gene promoter and susceptibility to lung cancer. *Cancer Detect Prev* **32**, 403-415 (2009).
  210. Tan W, Chen GF, Xing DY, Song CY, Kadlubar FF, Lin DX. Frequency of CYP2A6 gene deletion and its relation to risk of lung and esophageal cancer in the Chinese population. *Int J Cancer* **95**, 96-101 (2001).
  211. Tamaki Y, *et al.* Association between cancer risk and drug-metabolizing enzyme gene (CYP2A6, CYP2A13, CYP4B1, SULT1A1, GSTM1, and GSTT1) polymorphisms in cases of lung cancer in Japan. *Drug Metab Pharmacokinet* **26**, 516-522 (2011).
  212. Tamai S, *et al.* Restriction fragment length polymorphism analysis of the L-myc gene locus in a case-control study of lung cancer. *Int J Cancer* **46**, 411-415 (1990).



213. Taioli E, Ford J, Trachman J, Li Y, Demopoulos R, Garte S. Lung cancer risk and CYP1A1 genotype in African Americans. *Carcinogenesis* **19**, 813-817 (1998).
214. Szymanowska A, *et al.* Increased risk of non-small cell lung cancer and frequency of somatic TP53 gene mutations in Pro72 carriers of TP53 Arg72Pro polymorphism. *Lung Cancer* **52**, 9-14 (2006).
215. Swartz MD, *et al.* Investigating multiple candidate genes and nutrients in the folate metabolism pathway to detect genetic and nutritional risk factors for lung cancer. *PLoS One* **8**, e53475 (2013).
216. Svartberg J, *et al.* Single-nucleotide polymorphism, rs1799941 in the Sex Hormone-Binding Globulin (SHBG) gene, related to both serum testosterone and SHBG levels and the risk of myocardial infarction, type 2 diabetes, cancer and mortality in men: The Tromso Study. *Andrology* **2**, 212-218 (2014).
217. Suzuki T, *et al.* Impact of one-carbon metabolism-related gene polymorphisms on risk of lung cancer in Japan: a case control study. *Carcinogenesis* **28**, 1718-1725 (2007).
218. Sung JS, Jin L, Jo U, Park KH, Kim YH. Association between -276 C/T polymorphism of the ERBB3 gene and lung cancer risk in a Korean population. *Anticancer Res* **32**, 4433-4437 (2012).
219. Sung JS, *et al.* Putative association of the single nucleotide polymorphisms in RASSF1A promoter with Korean lung cancer. *Lung Cancer* **61**, 301-308 (2008).
220. Sunaga N, *et al.* Contribution of the NQO1 and GSTT1 polymorphisms to lung adenocarcinoma susceptibility. *Cancer Epidemiol Biomarkers Prev* **11**, 730-738 (2002).
221. Sun Y, Zhang YJ, Kong XM. No association of XRCC1 and CLPTM1L polymorphisms with non-small cell lung cancer in a non-smoking Han Chinese population. *Asian Pac J Cancer Prev* **14**, 5171-5174 (2013).
222. Sun T, *et al.* Functional genetic variations in cytotoxic T-lymphocyte antigen 4 and susceptibility to multiple types of cancer. *Cancer Res* **68**, 7025-7034 (2008).
223. Sun T, *et al.* Haplotypes in matrix metalloproteinase gene cluster on chromosome 11q22 contribute to the risk of lung cancer development and progression. *Clin Cancer Res* **12**, 7009-7017 (2006).
224. Sun T, *et al.* A six-nucleotide insertion-deletion polymorphism in the CASP8 promoter is associated with susceptibility to multiple cancers. *Nat Genet* **39**, 605-613 (2007).
225. Sun SF, Huang DB, Cao C, Deng ZC. Polymorphism of VEGF-460C/T associated with the risk and clinical characteristics of lung cancer in Chinese population. *Med Oncol* **30**, 410 (2013).
226. Sun JZ, Yang XX, Hu NY, Li X, Li FX, Li M. Genetic variants in MMP9 and TCF2 contribute to susceptibility to lung cancer. *Chin J Cancer Res* **23**, 183-187 (2011).
227. Sun GF, Shimojo N, Pi JB, Lee S, Kumagai Y. Gene deficiency of glutathione S-transferase mu isoform associated with susceptibility to lung cancer in a Chinese population. *Cancer Lett* **113**, 169-172 (1997).
228. Sugimura H, *et al.* Association of Ile462Val (Exon 7) polymorphism of cytochrome P450 IA1 with lung cancer in the Asian population: further evidence from a case-control study in Okinawa. *Cancer Epidemiol Biomarkers Prev* **7**, 413-417 (1998).
229. Sugimura H, *et al.* Cytochrome P-450 IA1 genotype in lung cancer patients and controls in Rio de Janeiro, Brazil. *Cancer Epidemiol Biomarkers Prev* **3**, 145-148 (1994).

230. Sugimura H, *et al.* hOGG1 Ser326Cys polymorphism and lung cancer susceptibility. *Cancer Epidemiol Biomarkers Prev* **8**, 669-674 (1999).
231. Sugimura H, *et al.* CYP1A1 and CYP2E1 polymorphism and lung cancer, case-control study in Rio de Janeiro, Brazil. *Pharmacogenetics* **5 Spec No**, S145-148 (1995).
232. Su XL, Bin B, Cui HW, Ran MR. Cytochrome P450 2E1 RsaI/PstI and DraI polymorphisms are risk factors for lung cancer in Mongolian and Han population in inner Mongolia. *Chin J Cancer Res* **23**, 107-111 (2011).
233. Su L, *et al.* Genotypes and haplotypes of matrix metalloproteinase 1, 3 and 12 genes and the risk of lung cancer. *Carcinogenesis* **27**, 1024-1029 (2006).
234. Su L, *et al.* No association between the p21 codon 31 serine-arginine polymorphism and lung cancer risk. *Cancer Epidemiol Biomarkers Prev* **12**, 174-175 (2003).
235. Stucker I, *et al.* Genetic polymorphisms of glutathione S-transferases as modulators of lung cancer susceptibility. *Carcinogenesis* **23**, 1475-1481 (2002).
236. Stucker I, *et al.* CYP2D6 genotype and lung cancer risk according to histologic type and tobacco exposure. *Carcinogenesis* **16**, 2759-2764 (1995).
237. Strazisar M, Mlakar V, Rott T, Glavac D. Somatic alterations of the serine/threonine kinase LKB1 gene in squamous cell (SCC) and large cell (LCC) lung carcinoma. *Cancer Invest* **27**, 407-416 (2009).
238. Stankovic MM, *et al.* TNF-alpha-308 promotor polymorphism in patients with chronic obstructive pulmonary disease and lung cancer. *Neoplasma* **56**, 348-352 (2009).
239. Sreelekha TT, Rajesh M, Anil Kumar V, Madhavan J, Balaram P. CYP1A1m2 polymorphisms regulate estrogen and interleukin-6 in lung cancer. *Mol Med Report* **3**, 971-976 (2010).
240. Sreeja L, *et al.* Prognostic importance of DNA repair gene polymorphisms of XRCC1 Arg399Gln and XPD Lys751Gln in lung cancer patients from India. *J Cancer Res Clin Oncol* **134**, 645-652 (2008).
241. Sreeja L, Syamala V, Raveendran PB, Santhi S, Madhavan J, Ankathil R. p53 Arg72Pro polymorphism predicts survival outcome in lung cancer patients in Indian population. *Cancer Invest* **26**, 41-46 (2008).
242. Sreeja L, *et al.* Glutathione S-transferase M1, T1 and P1 polymorphisms: susceptibility and outcome in lung cancer patients. *J Exp Ther Oncol* **7**, 73-85 (2008).
243. Sreeja L, Syamala V, Hariharan S, Madhavan J, Devan SC, Ankathil R. Possible risk modification by CYP1A1, GSTM1 and GSTT1 gene polymorphisms in lung cancer susceptibility in a South Indian population. *J Hum Genet* **50**, 618-627 (2005).
244. Spitz MR, *et al.* Modulation of nucleotide excision repair capacity by XPD polymorphisms in lung cancer patients. *Cancer Res* **61**, 1354-1357 (2001).
245. Spitz MR, *et al.* Case-control study of the D2 dopamine receptor gene and smoking status in lung cancer patients. *J Natl Cancer Inst* **90**, 358-363 (1998).
246. Spitz MR, *et al.* Variants in inflammation genes are implicated in risk of lung cancer in never smokers exposed to second-hand smoke. *Cancer Discov* **1**, 420-429 (2011).
247. Spitz MR, *et al.* Dietary intake of isothiocyanates: evidence of a joint effect with glutathione S-transferase polymorphisms in lung cancer risk. *Cancer Epidemiol Biomarkers Prev* **9**, 1017-1020 (2000).
248. Spitz MR, *et al.* Role of selected genetic variants in lung cancer risk in African

- Americans. *J Thorac Oncol* **8**, 391-397 (2013).
249. Spinola M, *et al.* Association of the PDCD5 locus with lung cancer risk and prognosis in smokers. *J Clin Oncol* **24**, 1672-1678 (2006).
  250. Spinola M, *et al.* Genome-wide single nucleotide polymorphism analysis of lung cancer risk detects the KLF6 gene. *Cancer Lett* **251**, 311-316 (2007).
  251. Spinola M, *et al.* Functional FGFR4 Gly388Arg polymorphism predicts prognosis in lung adenocarcinoma patients. *J Clin Oncol* **23**, 7307-7311 (2005).
  252. Spinola M, *et al.* A new polymorphism (Ser362Thr) of the L-myc gene is not associated with lung adenocarcinoma risk and prognosis. *Eur J Cancer Prev* **13**, 87-89 (2004).
  253. Soylemez F, Akbas E, Seyrek E, Mutluhan H, Camdeviren H. The relationship between the risk of lung cancer and the exon 5 (ILE105VAL) polymorphism of glutathione S-transferase P1 (GSTP1) gene. *Turkish Journal of Cancer* **36**, 5-10 (2006).
  254. Souto-Garcia A, Fernandez-Somoano A, Pascual T, Alvarez-Avellon SM, Tardon A. Association of p21 Ser31Arg and p53 Arg72Pro polymorphisms with lung cancer risk in CAPUA study. *Lung Cancer Targets Ther* **3**, 69-78 (2012).
  255. Sorensen M, Raaschou-Nielsen O, Hansen RD, Tjonneland A, Overvad K, Vogel U. Interactions between the OGG1 Ser326Cys polymorphism and intake of fruit and vegetables in relation to lung cancer. *Free Radic Res* **40**, 885-891 (2006).
  256. Sorensen M, Raaschou-Nielsen O, Brasch-Andersen C, Tjonneland A, Overvad K, Autrup H. Interactions between GSTM1, GSTT1 and GSTP1 polymorphisms and smoking and intake of fruit and vegetables in relation to lung cancer. *Lung Cancer* **55**, 137-144 (2007).
  257. Sorensen M, Autrup H, Tjonneland A, Overvad K, Raaschou-Nielsen O. Genetic polymorphisms in CYP1B1, GSTA1, NQO1 and NAT2 and the risk of lung cancer. *Cancer Lett* **221**, 185-190 (2005).
  258. Sorensen M, Autrup H, Tjonneland A, Overvad K, Raaschou-Nielsen O. A genetic polymorphism in prostaglandin synthase 2 (8473, T->C) and the risk of lung cancer. *Cancer Lett* **226**, 49-54 (2005).
  259. Sorensen M, Autrup H, Tjonneland A, Overvad K, Raaschou-Nielsen O. Glutathione S-transferase T1 null-genotype is associated with an increased risk of lung cancer. *Int J Cancer* **110**, 219-224 (2004).
  260. Song N, Tan W, Xing D, Lin D. CYP 1A1 polymorphism and risk of lung cancer in relation to tobacco smoking: a case-control study in China. *Carcinogenesis* **22**, 11-16 (2001).
  261. Son JW, *et al.* Polymorphisms in the caspase-8 gene and the risk of lung cancer. *Cancer Genet Cytogenet* **169**, 121-127 (2006).
  262. Sobti RC, Sharma S, Joshi A, Jindal SK, Janmeja A. Genetic polymorphism of the CYP1A1, CYP2E1, GSTM1 and GSTT1 genes and lung cancer susceptibility in a north indian population. *Mol Cell Biochem* **266**, 1-9 (2004).
  263. Sobti RC, Sharma S, Joshi A, Jindal SK, Janmeja A. CYP1A1 and CYP2D6 polymorphism and risk of lung cancer in a North Indian population. *Biomarkers* **8**, 415-428 (2003).
  264. Sobti RC, *et al.* Effects of cyclin D1 (CCND1) polymorphism on susceptibility to lung cancer in a North Indian population. *Cancer Genet Cytogenet* **170**, 108-114 (2006).
  265. Sobti RC, *et al.* Impact of interaction of polymorphic forms of p53 codon 72 and N-acetylation gene (NAT2) on the risk of lung cancer in the North Indian population. *DNA Cell Biol* **28**, 443-449 (2009).

266. Sobti RC, *et al.* Combined effect of GSTM1, GSTT1 and GSTP1 polymorphisms on histological subtypes of lung cancer. *Biomarkers* **13**, 282-295 (2008).
267. Sobti RC, *et al.* No association of DNA ligase-I polymorphism with the risk of lung cancer in north-Indian population. *DNA Cell Biol* **25**, 484-489 (2006).
268. Slovakova P, Majerova L, Matakova T, Skerenova M, Kavcova E, Halasova E. Mismatch repair gene polymorphisms and association with lung cancer development. *Adv Exp Med Biol* **833**, 15-22 (2015).
269. Sjalander A, Birgander R, Rannug A, Alexandrie AK, Tornling G, Beckman G. Association between the p21 codon 31 A1 (arg) allele and lung cancer. *Hum Hered* **46**, 221-225 (1996).
270. Sinues B, *et al.* MDR-1 C3435T genetic polymorphism and tobacco-related lung cancer. *Oncology* **64**, 183-185 (2003).
271. Singh AP, *et al.* Polymorphism in cytochrome P450 1A2 and their interaction with risk factors in determining risk of squamous cell lung carcinoma in men. *Cancer Biomark* **8**, 351-359 (2010).
272. Siemianowicz K, *et al.* Methylenetetrahydrofolate reductase gene C677T and A1298C polymorphisms in patients with small cell and non-small cell lung cancer. *Oncol Rep* **10**, 1341-1344 (2003).
273. Siemianowicz K, *et al.* Fibronectin gene polymorphism in patients with lung cancer. *Oncol Rep* **8**, 1289-1292 (2001).
274. Shiraishi K, *et al.* Contribution of nicotine acetylcholine receptor polymorphisms to lung cancer risk in a smoking-independent manner in the Japanese. *Carcinogenesis* **30**, 65-70 (2009).
275. Shin MC, *et al.* Glu346Lys polymorphism in the methyl-CpG binding domain 4 gene and the risk of primary lung cancer. *Jpn J Clin Oncol* **36**, 483-488 (2006).
276. Shih CM, Lin PT, Wang HC, Huang WC, Wang YC. Lack of evidence of association of p21WAF1/CIP1 polymorphism with lung cancer susceptibility and prognosis in Taiwan. *Jpn J Cancer Res* **91**, 9-15 (2000).
277. Shih CM, *et al.* The involvement of genetic polymorphism of IL-10 promoter in non-small cell lung cancer. *Lung Cancer* **50**, 291-297 (2005).
278. Shih CM, *et al.* Association of TNF-alpha polymorphism with susceptibility to and severity of non-small cell lung cancer. *Lung Cancer* **52**, 15-20 (2006).
279. Shih CM, *et al.* Association of L-myc polymorphism with lung cancer susceptibility and prognosis in relation to age-selected controls and stratified cases. *Lung Cancer* **36**, 125-132 (2002).
280. Shih CM, *et al.* Association of polymorphisms in the genes of the urokinase plasminogen activation system with susceptibility to and severity of non-small cell lung cancer. *Clin Chim Acta* **412**, 194-198 (2011).
281. Shih CM, Chen CY, Lee IH, Kao WT, Wang YC. A polymorphism in the hMLH1 gene (-93G-->A) associated with lung cancer susceptibility and prognosis. *Int J Mol Med* **25**, 165-170 (2010).
282. Shiels MS, *et al.* Genetic variation in innate immunity and inflammation pathways associated with lung cancer risk. *Cancer* **118**, 5630-5636 (2012).
283. Shields PG, *et al.* Lung cancer, race, and a CYP1A1 genetic polymorphism. *Cancer Epidemiol Biomarkers Prev* **2**, 481-485 (1993).
284. Shieh JM, *et al.* Lack of association of C-Met-N375S sequence variant with lung cancer susceptibility and prognosis. *Int J Med Sci* **10**, 988-994 (2013).
285. Shi Y, *et al.* C10ORF97 is a novel tumor-suppressor gene of non-small-cell lung cancer and a functional variant of this gene increases the risk of non-small-cell

- lung cancer. *Oncogene* **30**, 4107-4117 (2011).
286. Shi WX, Chen SQ. Frequencies of poor metabolizers of cytochrome P450 2C19 in esophagus cancer, stomach cancer, lung cancer and bladder cancer in Chinese population. *World J Gastroenterol* **10**, 1961-1963 (2004).
287. Shi W, Yang B, Li X, Sun S, Wang L, Jiao S. The effect of lysyl oxidase polymorphism on susceptibility and prognosis of nonsmall cell lung cancer. *Tumour Biol* **33**, 2379-2383 (2012).
288. Shi Q, Zhang Z, Neumann AS, Li G, Spitz MR, Wei Q. Case-control analysis of thymidylate synthase polymorphisms and risk of lung cancer. *Carcinogenesis* **26**, 649-656 (2005).
289. Shi Q, *et al.* Polymorphisms of methionine synthase and methionine synthase reductase and risk of lung cancer: a case-control analysis. *Pharmacogenet Genomics* **15**, 547-555 (2005).
290. Shi Q, *et al.* Sex differences in risk of lung cancer associated with methylene-tetrahydrofolate reductase polymorphisms. *Cancer Epidemiol Biomarkers Prev* **14**, 1477-1484 (2005).
291. Shen M, *et al.* Polymorphisms in innate immunity genes and lung cancer risk in Xuanwei, China. *Environ Mol Mutagen* **50**, 285-290 (2009).
292. Shen M, *et al.* Polymorphisms in folate metabolic genes and lung cancer risk in Xuan Wei, China. *Lung Cancer* **49**, 299-309 (2005).
293. Shen M, *et al.* Polymorphisms in the DNA base excision repair genes APEX1 and XRCC1 and lung cancer risk in Xuan Wei, China. *Anticancer Res* **25**, 537-542 (2005).
294. Shen M, *et al.* Polymorphisms in the DNA nucleotide excision repair genes and lung cancer risk in Xuan Wei, China. *Int J Cancer* **116**, 768-773 (2005).
295. Shen L, Yin Z, Wu W, Ren Y, Li X, Zhou B. Single nucleotide polymorphism in ATM gene, cooking oil fumes and lung adenocarcinoma susceptibility in Chinese female non-smokers: A case-control study. *PLoS One* **9**, (2014).
296. Shen H, Wang L, Spitz MR, Hong WK, Mao L, Wei Q. A novel polymorphism in human cytosine DNA-methyltransferase-3B promoter is associated with an increased risk of lung cancer. *Cancer Res* **62**, 4992-4995 (2002).
297. Shen H, Spitz MR, Wang LE, Hong WK, Wei Q. Polymorphisms of methylene-tetrahydrofolate reductase and risk of lung cancer: a case-control study. *Cancer Epidemiol Biomarkers Prev* **10**, 397-401 (2001).
298. Shen H, Spitz MR, Qiao Y, Zheng Y, Hong WK, Wei Q. Polymorphism of DNA ligase I and risk of lung cancer--a case-control analysis. *Lung Cancer* **36**, 243-247 (2002).
299. Shen B, Zhu Q, Zheng MQ, Chen J, Shi MQ, Feng JF. CHRNA5 polymorphism and susceptibility to lung cancer in a Chinese population. *Braz J Med Biol Res* **46**, 79-84 (2013).
300. Shen B, Shi MQ, Zheng MQ, Hu SN, Chen J, Feng JF. Correlation between polymorphisms of nicotine acetylcholine acceptor subunit CHRNA3 and lung cancer susceptibility. *Mol Med Rep* **6**, 1389-1392 (2012).
301. Shaw GL, *et al.* Frequency of the variant allele CYP2D6(C) among North American Caucasian lung cancer patients and controls. *Lung Cancer* **17**, 61-68 (1997).
302. Shaw GL, *et al.* Genetic polymorphism of CYP2D6 and lung cancer risk. *Cancer Epidemiol Biomarkers Prev* **7**, 215-219 (1998).
303. Shao M, *et al.* Polymorphisms in excision repair cross-complementing group 4 (ERCC4) and susceptibility to primary lung cancer in a Chinese Han population.

- Lung Cancer* **60**, 332-339 (2008).
304. Shah PP, *et al.* Interaction of cytochrome P4501A1 genotypes with other risk factors and susceptibility to lung cancer. *Mutat Res* **639**, 1-10 (2008).
  305. Shah PP, *et al.* Association of functionally important polymorphisms in cytochrome P4501B1 with lung cancer. *Mutat Res* **643**, 4-10 (2008).
  306. Shaffi SM, Shah MA, Bhat IA, Koul P, Ahmad SN, Siddiqi MA. CYP1A1 polymorphisms and risk of lung cancer in the ethnic Kashmiri population. *Asian Pac J Cancer Prev* **10**, 651-656 (2009).
  307. Sgambato A, *et al.* Glutathione S-transferase (GST) polymorphisms as risk factors for cancer in a highly homogeneous population from southern Italy. *Anticancer Res* **22**, 3647-3652 (2002).
  308. Seow A, *et al.* NAT2 slow acetylator genotype is associated with increased risk of lung cancer among non-smoking Chinese women in Singapore. *Carcinogenesis* **20**, 1877-1881 (1999).
  309. Seow A, *et al.* Cytochrome P4501A2 (CYP1A2) activity and lung cancer risk: a preliminary study among Chinese women in Singapore. *Carcinogenesis* **22**, 673-677 (2001).
  310. Seow A, *et al.* Joint effect of asthma/atopy and an IL-6 gene polymorphism on lung cancer risk among lifetime non-smoking Chinese women. *Carcinogenesis* **27**, 1240-1244 (2006).
  311. Seifart C, Seifart U, Plagens A, Wolf M, von Wichert P. Surfactant protein B gene variations enhance susceptibility to squamous cell carcinoma of the lung in German patients. *Br J Cancer* **87**, 212-217 (2002).
  312. Seifart C, *et al.* TNF-alpha, TNF-beta, IL-6, and IL-10 polymorphisms in patients with lung cancer. *Dis Markers* **21**, 157-165 (2005).
  313. Schwartz AG, Cote ML, Wenzlaff AS, Land S, Amos CI. Racial differences in the association between SNPs on 15q25.1, smoking behavior, and risk of non-small cell lung cancer. *J Thorac Oncol* **4**, 1195-1201 (2009).
  314. Schneider J, Classen V, Bernges U, Philipp M. XRCC1 polymorphism and lung cancer risk in relation to tobacco smoking. *Int J Mol Med* **16**, 709-716 (2005).
  315. Schneider J, Bernges U, Philipp M, Weitowitz HJ. GSTM1, GSTT1, and GSTP1 polymorphism and lung cancer risk in relation to tobacco smoking. *Cancer Lett* **208**, 65-74 (2004).
  316. Schneider J, Bernges U. CYP1A1 and CYP1B1 polymorphisms as modifying factors in patients with pneumoconiosis and occupationally related tumours: A pilot study. *Mol Med Report* **2**, 1023-1028 (2009).
  317. Schenk S, Schraml P, Bendik I, Ludwig CU. A novel polymorphism in the promoter of the RAGE gene is associated with non-small cell lung cancer. *Lung Cancer* **32**, 7-12 (2001).
  318. Schabath MB, *et al.* A myeloperoxidase polymorphism associated with reduced risk of lung cancer. *Lung Cancer* **37**, 35-40 (2002).
  319. Sauter W, *et al.* Matrix metalloproteinase 1 (MMP1) is associated with early-onset lung cancer. *Cancer Epidemiol Biomarkers Prev* **17**, 1127-1135 (2008).
  320. Sarlinova M, *et al.* Polymorphisms of DNA repair genes and lung cancer in chromium exposure. *Adv Exp Med Biol* **833**, 1-8 (2015).
  321. San Jose C, Cabanillas A, Benitez J, Carrillo JA, Jimenez M, Gervasini G. CYP1A1 gene polymorphisms increase lung cancer risk in a high-incidence region of Spain: a case control study. *BMC Cancer* **10**, 463 (2010).
  322. Sameni S, Ghayumi MA, Mortazavi G, Faghih Z, Kashef MA, Ghaderi A. Lack

- of association between interleukin-13 gene polymorphisms (-1055 C/T and +2044 G/A) in Iranian patients with lung cancer. *Mol Biol Rep* **36**, 1001-1005 (2009).
323. Saldivar SJ, *et al.* An association between a NQO1 genetic polymorphism and risk of lung cancer. *Mutat Res* **582**, 71-78 (2005).
  324. Salagovic J, *et al.* Genetic polymorphism of glutathione S-transferases M1 and T1 as a risk factor in lung and bladder cancers. *Neoplasma* **45**, 312-317 (1998).
  325. Sakoda LC, *et al.* Chromosome 15q24-25.1 variants, diet, and lung cancer susceptibility in cigarette smokers. *Cancer Causes Control* **22**, 449-461 (2011).
  326. Sakoda LC, *et al.* Germ line variation in nucleotide excision repair genes and lung cancer risk in smokers. *Int J Mol Epidemiol Genet* **3**, 1-17 (2012).
  327. Sakiyama T, *et al.* Association of amino acid substitution polymorphisms in DNA repair genes TP53, POLI, REV1 and LIG4 with lung cancer risk. *Int J Cancer* **114**, 730-737 (2005).
  328. Saikia BJ, Phukan RK, Sharma SK, Sekhon GS, Mahanta J. Interaction of XRCC1 and XPD gene polymorphisms with lifestyle and environmental factors regarding susceptibility to lung cancer in a high incidence population in North East India. *Asian Pac J Cancer Prev* **15**, 1993-1999 (2014).
  329. Saarikoski ST, *et al.* Combined effect of polymorphic GST genes on individual susceptibility to lung cancer. *Int J Cancer* **77**, 516-521 (1998).
  330. Saarikoski ST, *et al.* Role of NAT2 deficiency in susceptibility to lung cancer among asbestos-exposed individuals. *Pharmacogenetics* **10**, 183-185 (2000).
  331. Ryk C, Kumar R, Thirumaran RK, Hou SM. Polymorphisms in the DNA repair genes XRCC1, APEX1, XRCC3 and NBS1, and the risk for lung cancer in never- and ever-smokers. *Lung Cancer* **54**, 285-292 (2006).
  332. Ryberg D, *et al.* Allele diversity of the H-ras-1 variable number of tandem repeats in Norwegian lung cancer patients. *Environ Health Perspect* **98**, 187-189 (1992).
  333. Ryberg D, *et al.* Genotypes of glutathione transferase M1 and P1 and their significance for lung DNA adduct levels and cancer risk. *Carcinogenesis* **18**, 1285-1289 (1997).
  334. Ryan BM, *et al.* MDM2 SNP285 does not antagonize the effect of SNP309 in lung cancer. *Int J Cancer* **131**, 2710-2716 (2012).
  335. Rusin M, *et al.* Intronic Polymorphism (1541-1542deIGT) of the Constitutive Heat Shock Protein 70 Gene Has Functional Significance and Shows Evidence of Association with Lung Cancer Risk. *Mol Carcinog* **39**, 155-163 (2004).
  336. Rudd MF, *et al.* Variants in the GH-IGF axis confer susceptibility to lung cancer. *Genome Res* **16**, 693-701 (2006).
  337. Ruano-Ravina A, Pereyra MF, Castro MT, Perez-Rios M, Abal-Arca J, Barros-Dios JM. Genetic susceptibility, residential radon, and lung cancer in a radon prone area. *J Thorac Oncol* **9**, 1073-1080 (2014).
  338. Ruano-Ravina A, Figueiras A, Loidi L, Barros-Dios JM. GSTM1 and GSTT1 polymorphisms, tobacco and risk of lung cancer: a case-control study from Galicia, Spain. *Anticancer Res* **23**, 4333-4337 (2003).
  339. Rotunno M, *et al.* Inherited polymorphisms in the RNA-mediated interference machinery affect microRNA expression and lung cancer survival. *Br J Cancer* **103**, 1870-1874 (2010).
  340. Rotunno M, *et al.* Phase I metabolic genes and risk of lung cancer: multiple polymorphisms and mRNA expression. *PLoS One* **4**, e5652 (2009).
  341. Rotunno M, *et al.* GSTM1 and GSTT1 copy numbers and mRNA expression in

- lung cancer. *Mol Carcinog* **51 Suppl 1**, E142-150 (2012).
342. Rosvold EA, McGlynn KA, Lustbader ED, Buetow KH. Identification of an NAD(P)H:quinone oxidoreductase polymorphism and its association with lung cancer and smoking. *Pharmacogenetics* **5**, 199-206 (1995).
343. Rosell R, *et al.* Genetic susceptibility associated with rare HRAS1 variable number of tandem repeats alleles in Spanish non-small cell lung cancer patients. *Clin Cancer Res* **5**, 1849-1854 (1999).
344. Rogers C, *et al.* Two novel insertion polymorphisms of the BRM gene are associated with loss of BRM expression and lung cancer risk. *Cancer Res* **70**, (2010).
345. Risch A, *et al.* Glutathione-S-transferase M1, M3, T1 and P1 polymorphisms and susceptibility to non-small-cell lung cancer subtypes and hamartomas. *Pharmacogenetics* **11**, 757-764 (2001).
346. Ribeiro R, *et al.* A functional polymorphism in the promoter region of leptin gene increases susceptibility for non-small cell lung cancer. *Eur J Cancer* **42**, 1188-1193 (2006).
347. Reszka E, Wasowicz W, Gromadzinska J. Antioxidant defense markers modulated by glutathione S-transferase genetic polymorphism: Results of lung cancer case-control study. *Genes and Nutrition* **2**, 287-294 (2007).
348. Ren YW, *et al.* P53 Arg72Pro and MDM2 SNP309 polymorphisms cooperate to increase lung adenocarcinoma risk in Chinese female non-smokers: a case control study. *Asian Pac J Cancer Prev* **14**, 5415-5420 (2013).
349. Ren JH, *et al.* Association between CHRNA3 rs1051730 genotype and lung cancer risk in Chinese Han population: a case-control study. *J Huazhong Univ Sci Technolog Med Sci* **33**, 897-901 (2013).
350. Razmkhah M, Doroudchi M, Ghayumi SM, Erfani N, Ghaderi A. Stromal cell-derived factor-1 (SDF-1) gene and susceptibility of Iranian patients with lung cancer. *Lung Cancer* **49**, 311-315 (2005).
351. Ratnasinghe D, *et al.* Polymorphisms of the DNA repair gene XRCC1 and lung cancer risk. *Cancer Epidemiol Biomarkers Prev* **10**, 119-123 (2001).
352. Ratnasinghe D, *et al.* Influence of antioxidants and the CYP1A1 isoleucine to valine polymorphism on the smoking--lung cancer association. *Anticancer Res* **21**, 1295-1299 (2001).
353. Ratnasinghe D, *et al.* Glutathione peroxidase codon 198 polymorphism variant increases lung cancer risk. *Cancer Res* **60**, 6381-6383 (2000).
354. Ramzy MM, Solliman MEDM, Abdel-Hafiz HA, Salah R. Genetic polymorphism of GSTM1 and GSTP1 in lung cancer in Egypt. *Int J Collab Res Intern Med Public Health* **3**, 41-51 (2011).
355. Rafrafi A, *et al.* Association of IL-8 gene polymorphisms with non small cell lung cancer in Tunisia: A case control study. *Hum Immunol* **74**, 1368-1374 (2013).
356. Raaschou-Nielsen O, Sorensen M, Overvad K, Tjonneland A, Vogel U. Polymorphisms in nucleotide excision repair genes, smoking and intake of fruit and vegetables in relation to lung cancer. *Lung Cancer* **59**, 171-179 (2008).
357. Raaschou-Nielsen O, *et al.* GPX1 Pro198Leu polymorphism, interactions with smoking and alcohol consumption, and risk for lung cancer. *Cancer Lett* **247**, 293-300 (2007).
358. Quinones L, *et al.* CYP1A1, CYP2E1 and GSTM1 genetic polymorphisms. The effect of single and combined genotypes on lung cancer susceptibility in Chilean people. *Cancer Lett* **174**, 35-44 (2001).



359. Qiuling S, Yuxin Z, Suhua Z, Cheng X, Shuguang L, Fengsheng H. Cyclin D1 gene polymorphism and susceptibility to lung cancer in a Chinese population. *Carcinogenesis* **24**, 1499-1503 (2003).
360. Qiu F, *et al.* A functional polymorphism in the promoter of ERK5 gene interacts with tobacco smoking to increase the risk of lung cancer in Chinese populations. *Mutagenesis* **28**, 561-567 (2013).
361. Qian J, *et al.* Association between polymorphisms in the GSTA4 gene and risk of lung cancer: a case-control study in a Southeastern Chinese population. *Mol Carcinog* **48**, 253-259 (2009).
362. Qian B, Zhang H, Zhang L, Zhou X, Yu H, Chen K. Association of genetic polymorphisms in DNA repair pathway genes with non-small cell lung cancer risk. *Lung Cancer* **73**, 138-146 (2011).
363. Putra AC, Tanimoto K, Arifin M, Hiyama K. Hypoxia-inducible factor-1alpha polymorphisms are associated with genetic aberrations in lung cancer. *Respirology* **16**, 796-802 (2011).
364. Popanda O, *et al.* Specific combinations of DNA repair gene variants and increased risk for non-small cell lung cancer. *Carcinogenesis* **25**, 2433-2441 (2004).
365. Popanda O, *et al.* Elevated risk of squamous-cell carcinoma of the lung in heavy smokers carrying the variant alleles of the TP53 Arg72Pro and p21 Ser31Arg polymorphisms. *Lung Cancer* **55**, 25-34 (2007).
366. Piskac-Collier AL, *et al.* Variants in folate pathway genes as modulators of genetic instability and lung cancer risk. *Genes Chromosomes Cancer* **50**, 1-12 (2011).
367. Pisani P, *et al.* GSTM1 and CYP1A1 polymorphisms, tobacco, air pollution, and lung cancer: a study in rural Thailand. *Cancer Epidemiol Biomarkers Prev* **15**, 667-674 (2006).
368. Pine SR, *et al.* MDM2 SNP309 and SNP354 are not associated with lung cancer risk. *Cancer Epidemiol Biomarkers Prev* **15**, 1559-1561 (2006).
369. Pinarbasi H, Silig Y, Cetinkaya O, Seyfikli Z, Pinarbasi E. Strong association between the GSTM1-null genotype and lung cancer in a Turkish population. *Cancer Genet Cytogenet* **146**, 125-129 (2003).
370. Pierce LM, *et al.* Relationships of TP53 codon 72 and HRAS1 polymorphisms with lung cancer risk in an ethnically diverse population. *Cancer Epidemiol Biomarkers Prev* **9**, 1199-1204 (2000).
371. Piao JM, *et al.* Glutathione-S-transferase (GSTM1, GSTT1) null phenotypes and risk of lung cancer in a Korean population. *Asian Pac J Cancer Prev* **14**, 7165-7169 (2013).
372. Piao JM, *et al.* p53 codon 72 polymorphism and the risk of lung cancer in a Korean population. *Lung Cancer* **73**, 264-267 (2011).
373. Phang BH, Chua HW, Li H, Linn YC, Sabapathy K. Characterization of novel and uncharacterized p53 SNPs in the chinese population - Intron 2 SNP co-segregates with the common codon 72 polymorphism. *PLoS One* **6**, (2011).
374. Persson I, *et al.* Genetic polymorphism of xenobiotic metabolizing enzymes among Chinese lung cancer patients. *Int J Cancer* **81**, 325-329 (1999).
375. Persson I, *et al.* Genetic polymorphism of cytochrome P4502E1 in a Swedish population. Relationship to incidence of lung cancer. *FEBS Lett* **319**, 207-211 (1993).
376. Perez-Morales R, *et al.* Genetic susceptibility to lung cancer based on candidate genes in a sample from the Mexican Mestizo population: a case-control study.

- Lung* **192**, 167-173 (2014).
377. Perera FP, *et al.* Associations between carcinogen-DNA damage, glutathione S-transferase genotypes, and risk of lung cancer in the prospective Physicians' Health Cohort Study. *Carcinogenesis* **23**, 1641-1646 (2002).
  378. Pavanello S, *et al.* Role of CYP1A2 polymorphisms on lung cancer risk in a prospective study. *Cancer Genet* **205**, 278-284 (2012).
  379. Paulus JK, Zhou W, Kraft P, Johnson BE, Lin X, Christiani DC. Haplotypes of estrogen receptor-beta and risk of non-small cell lung cancer in women. *Lung Cancer* **71**, 258-263 (2011).
  380. Park SL, *et al.* Associations between variants of the 8q24 chromosome and nine smoking-related cancer sites. *Cancer Epidemiol Biomarkers Prev* **17**, 3193-3202 (2008).
  381. Park SL, *et al.* Associations between NBS1 polymorphisms, haplotypes and smoking-related cancers. *Carcinogenesis* **31**, 1264-1271 (2010).
  382. Park SH, *et al.* -93G->A polymorphism of hMLH1 and risk of primary lung cancer. *Int J Cancer* **112**, 678-682 (2004).
  383. Park SH, *et al.* Polymorphisms in the FAS and FASL genes and risk of lung cancer in a Korean population. *Lung Cancer* **54**, 303-308 (2006).
  384. Park SH, *et al.* MDM2 309T>G polymorphism and risk of lung cancer in a Korean population. *Lung Cancer* **54**, 19-24 (2006).
  385. Park KH, *et al.* Single nucleotide polymorphisms of the TGFB1 gene and lung cancer risk in a Korean population. *Cancer Genet Cytogenet* **169**, 39-44 (2006).
  386. Park JY, *et al.* Polymorphisms of the DNA repair gene xeroderma pigmentosum group A and risk of primary lung cancer. *Cancer Epidemiol Biomarkers Prev* **11**, 993-997 (2002).
  387. Park JY, *et al.* Caspase 9 promoter polymorphisms and risk of primary lung cancer. *Hum Mol Genet* **15**, 1963-1971 (2006).
  388. Park JY, *et al.* Impact of smoking on lung cancer risk is stronger in those with the homozygous aldehyde dehydrogenase 2 null allele in a Japanese population. *Carcinogenesis* **31**, 660-665 (2010).
  389. Park JY, *et al.* Lys751Gln polymorphism in the DNA repair gene XPD and risk of primary lung cancer. *Lung Cancer* **36**, 15-16 (2002).
  390. Park JY, *et al.* Polymorphism of the DNA repair gene XRCC1 and risk of primary lung cancer. *Cancer Epidemiol Biomarkers Prev* **11**, 23-27 (2002).
  391. Park JY, Chen L, Lee J, Sellers T, Tockman MS. Polymorphisms in the promoter region of neutrophil elastase gene and lung cancer risk. *Lung Cancer* **48**, 315-321 (2005).
  392. Park JY, Chen L, Elahi A, Lazarus P, Tockman MS. Genetic analysis of microsomal epoxide hydrolase gene and its association with lung cancer risk. *Eur J Cancer Prev* **14**, 223-230 (2005).
  393. Park JM, *et al.* No association between polymorphisms in the histone deacetylase genes and the risk of lung cancer. *Cancer Epidemiol Biomarkers Prev* **14**, 1841-1843 (2005).
  394. Park JM, *et al.* Relationship between cyclooxygenase 8473T>C polymorphism and the risk of lung cancer: A case-control study. *BMC Cancer* **6**, (2006).
  395. Park JH, *et al.* Myeloperoxidase -463G>A polymorphism and risk of primary lung cancer in a Korean population. *Cancer Detect Prev* **30**, 257-261 (2006).
  396. Park J, Chen L, Tockman MS, Elahi A, Lazarus P. The human 8-oxoguanine DNA N-glycosylase 1 (hOGG1) DNA repair enzyme and its association with lung cancer risk. *Pharmacogenetics* **14**, 103-109 (2004).

397. Papadakis ED, Soultzis N, Spandidos DA. Association of p53 codon 72 polymorphism with advanced lung cancer: the Arg allele is preferentially retained in tumours arising in Arg/Pro germline heterozygotes. *Br J Cancer* **87**, 1013-1018 (2002).
398. Pandima Devi K, Sivamaruthi B, Kiruthiga PV, Karutha Pandian S. Study of p53 codon 72 polymorphism and codon 249 mutations in Southern India in relation to age, alcohol drinking and smoking habits. *Hum Exp Toxicol* **29**, 451-458 (2010).
399. Pan H, *et al.* Contributory role of five common polymorphisms of RAGE and APE1 genes in lung cancer among Han Chinese. *PLoS One* **8**, e69018 (2013).
400. Pan C, Zhu G, Yan Z, Zhou Y, Liu Z. Glutathione S-transferase T1 and M1 polymorphisms are associated with lung cancer risk in a gender-specific manner. *Oncol Res Treat* **37**, 164-169 (2014).
401. Pachouri SS, Sobti RC, Kaur P, Singh J, Gupta SK. Impact of polymorphism in sulfotransferase gene on the risk of lung cancer. *Cancer Genet Cytogenet* **171**, 39-43 (2006).
402. Pachouri SS, Sobti RC, Kaur P, Singh J. Contrasting impact of DNA repair gene XRCC1 polymorphisms Arg399Gln and Arg194Trp on the risk of lung cancer in North-Indian population. *DNA Cell Biol* **26**, 186-191 (2007).
403. Ozturk O, Isbir T, Yaylim I, Kocaturk CI, Gurses A. GST M1 and CYP1A1 gene polymorphism and daily fruit consumption in Turkish patients with non-small cell lung carcinomas. *In Vivo* **17**, 625-632 (2003).
404. Ozen F, Polat F, Arslan S, Ozdemir O. Combined germline variations of thrombophilic genes promote genesis of lung cancer. *Asian Pac J Cancer Prev* **14**, 5449-5454 (2013).
405. Ozbey U, Yuce H, Namli M, Elkiran T. Investigation of differences in P53 Gene polymorphisms between schizophrenia and lung cancer patients in the Turkish population. *Genetics Research International* **2011**, (2011).
406. Oyama T, Kawamoto T, Mizoue T, Yasumoto K, Kodama Y, Mitsudomi T. N-acetylation polymorphism in patients with lung cancer and its association with p53 gene mutation. *Anticancer Res* **17**, 577-581 (1997).
407. Oyama T, *et al.* Cytochrome P450 2E1 polymorphism as a risk factor for lung cancer: In relation to p53 gene mutation. *Anticancer Res* **17**, 583-587 (1997).
408. Ouyang FD, *et al.* Polymorphisms of DNA repair genes XPD, XRCC1, and OGG1, and lung adenocarcinoma susceptibility in Chinese population. *Tumour Biol* **34**, 2843-2848 (2013).
409. Osawa Y, *et al.* NAT2 and CYP1A2 polymorphisms and lung cancer risk in relation to smoking status. *Asian Pac J Cancer Prev* **8**, 103-108 (2007).
410. Osawa K, *et al.* APEX1 Asp148Glu gene polymorphism is a risk factor for lung cancer in relation to smoking in Japanese. *Asian Pac J Cancer Prev* **11**, 1181-1186 (2010).
411. Oltulu YM, *et al.* Investigation of NF-kappaB1 and NF-kappaBIA gene polymorphism in non-small cell lung cancer. *Biomed Res Int* **2014**, 530381 (2014).
412. Okasaka T, *et al.* hOGG1 Ser326Cys polymorphism and risk of lung cancer by histological type. *J Hum Genet* **54**, 739-745 (2009).
413. Oh SS, *et al.* Single nucleotide polymorphisms of 8 inflammation-related genes and their associations with smoking-related cancers. *Int J Cancer* **127**, 2169-2182 (2010).
414. Noda N, Matsuzoe D, Konno T, Kawahara K, Yamashita Y, Shirakusa T. Risk for

- K-ras gene mutations in smoking-induced lung cancer is associated with cytochrome P4501A1 and glutathione S-transferase micro1 polymorphisms. *Oncol Rep* **12**, 773-779 (2004).
415. Niu X, *et al.* Association of the CHRNA3 locus with lung cancer risk and prognosis in Chinese Han population. *J Thorac Oncol* **5**, 658-666 (2010).
  416. Nikishina MV, Vavilin VA, Makarova SI, Lyakhovich VV. Analysis of associations of NAT2 gene polymorphisms with the risk of lung cancer. *Bull Exp Biol Med* **143**, 83-86 (2007).
  417. Nichenametla SN, Muscat JE, Liao JG, Lazarus P, Richie JP, Jr. A functional trinucleotide repeat polymorphism in the 5'-untranslated region of the glutathione biosynthetic gene GCLC is associated with increased risk for lung and aerodigestive tract cancers. *Mol Carcinog* **52**, 791-799 (2013).
  418. Ng DP, Tan KW, Zhao B, Seow A. CYP1A1 polymorphisms and risk of lung cancer in non-smoking Chinese women: influence of environmental tobacco smoke exposure and GSTM1/T1 genetic variation. *Cancer Causes Control* **16**, 399-405 (2005).
  419. Nazar-Stewart V, Vaughan TL, Stapleton P, Van Loo J, Nicol-Blades B, Eaton DL. A population-based study of glutathione S-transferase M1, T1 and P1 genotypes and risk for lung cancer. *Lung Cancer* **40**, 247-258 (2003).
  420. Natukula K, Jamil K, Pingali UR, Attili VS, Madireddy UR. The codon 399 Arg/Gln XRCC1 polymorphism is associated with lung cancer in Indians. *Asian Pac J Cancer Prev* **14**, 5275-5279 (2013).
  421. Nanba K, *et al.* The allelic distribution of a single nucleotide polymorphism in the PDCD5 gene locus of Japanese non-small cell lung cancer patients. *Mol Med Report* **1**, 667-671 (2008).
  422. Nakane H, *et al.* Impact of metallothionein gene polymorphisms on the risk of lung cancer in a Japanese population. *Mol Carcinog*, (2014).
  423. Nakachi K, Imai K, Hayashi S, Kawajiri K. Polymorphisms of the CYP1A1 and glutathione S-transferase genes associated with susceptibility to lung cancer in relation to cigarette dose in a Japanese population. *Cancer Res* **53**, 2994-2999 (1993).
  424. Nakachi K, Imai K, Hayashi S, Watanabe J, Kawajiri K. Genetic susceptibility to squamous cell carcinoma of the lung in relation to cigarette smoking dose. *Cancer Res* **51**, 5177-5180 (1991).
  425. Nakachi K, Hayashi S, Kawajiri K, Imai K. Association of cigarette smoking and CYP1A1 polymorphisms with adenocarcinoma of the lung by grades of differentiation. *Carcinogenesis* **16**, 2209-2213 (1995).
  426. Naik NA, *et al.* Vascular endothelial growth factor A gene (VEGFA) polymorphisms and expression of VEGFA gene in lung cancer patients of Kashmir Valley (India). *Tumour Biol* **33**, 833-839 (2012).
  427. Nadji SA, *et al.* An increased lung cancer risk associated with codon 72 polymorphism in the TP53 gene and human papillomavirus infection in Mazandaran province, Iran. *Lung Cancer* **56**, 145-151 (2007).
  428. Nacak M, Nacak I, Sanl SM, Ozkur M, Pektas M, Aynacioglu AT. Association of angiotensin converting enzyme gene insertion/deletion polymorphism with lung cancer in turkey. *Cancer Genet Cytogenet* **198**, 22-26 (2010).
  429. Myneni AA, *et al.* Genetic polymorphisms of TERT and CLPTM1L and risk of lung cancer-A case-control study in a Chinese population. *Lung Cancer* **80**, 131-137 (2013).
  430. Murata M, Tagawa M, Kimura H, Kakisawa K, Shirasawa H, Fujisawa T.

- Correlation of the mutation of p53 gene and the polymorphism at codon 72 in smoking-related non-small cell lung cancer patients. *Int J Oncol* **12**, 577-581 (1998).
431. Motovali-Bashi M, Rezaei H, Dehghanian F, Rezaei H. Association between XPD (Lys751Gln) polymorphism and lung cancer risk: A population-based study in Iran. *Cell Journal* **16**, 309-314 (2014).
  432. Motovali-Bashi M, Biglari M, Hojati Z, Hemati S, Khodadad K. Role of CYP1A1 MspI polymorphism in CYP1A1 gene with susceptibility to lung cancer in Iranian patients. *J Res Med Sci* **17**, S242-S246 (2012).
  433. Mota P, Moura DS, Vale MG, Coimbra H, Carvalho L, Regateiro F. CYP1A1 m1 and m2 polymorphisms: genetic susceptibility to lung cancer. *Rev Port Pneumol* **16**, 89-98 (2010).
  434. Mostaid MS, Ahmed MU, Islam MS, Bin Sayeed MS, Hasnat A. Lung cancer risk in relation to TP53 codon 47 and codon 72 polymorphism in Bangladeshi population. *Tumour Biol* **35**, 10309-10317 (2014).
  435. Moreira A, *et al.* Glutathione S-transferase mu polymorphism and susceptibility to lung cancer in the Portuguese population. *Teratog Carcinog Mutagen* **16**, 269-274 (1996).
  436. Moon JW, *et al.* Promoter -202 A/C polymorphism of insulin-like growth factor binding protein-3 gene and non-small cell lung cancer risk. *Int J Cancer* **118**, 353-356 (2006).
  437. Miyamoto M, *et al.* CYP2A6 gene deletion reduces susceptibility to lung cancer. *Biochem Biophys Res Commun* **261**, 658-660 (1999).
  438. Miyaishi A, *et al.* MUTYH Gln324His gene polymorphism and genetic susceptibility for lung cancer in a Japanese population. *J Exp Clin Cancer Res* **28**, 10 (2009).
  439. Mita Y, *et al.* Missense polymorphisms of PTPRJ and PTPN13 genes affect susceptibility to a variety of human cancers. *J Cancer Res Clin Oncol* **136**, 249-259 (2010).
  440. Misra RR, *et al.* Variation in the promoter region of the myeloperoxidase gene is not directly related to lung cancer risk among male smokers in Finland. *Cancer Lett* **164**, 161-167 (2001).
  441. Misra RR, *et al.* Polymorphisms in the DNA repair genes XPD, XRCC1, XRCC3, and APE/ref-1, and the risk of lung cancer among male smokers in Finland. *Cancer Lett* **191**, 171-178 (2003).
  442. Minegishi Y, *et al.* Susceptibility to lung cancer and genetic polymorphisms in the alcohol metabolite-related enzymes alcohol dehydrogenase 3, aldehyde dehydrogenase 2, and cytochrome P450 2E1 in the Japanese population. *Cancer* **110**, 353-362 (2007).
  443. Miller DP, *et al.* Combinations of the variant genotypes of GSTP1, GSTM1, and p53 are associated with an increased lung cancer risk. *Cancer Res* **62**, 2819-2823 (2002).
  444. Miller DP, *et al.* An association between glutathione S-transferase P1 gene polymorphism and younger age at onset of lung carcinoma. *Cancer* **107**, 1570-1577 (2006).
  445. Michiels S, *et al.* Polymorphism discovery in 62 DNA repair genes and haplotype associations with risks for lung and head and neck cancers. *Carcinogenesis* **28**, 1731-1739 (2007).
  446. Miao R, *et al.* Tagging single nucleotide polymorphisms in MBD4 are associated with risk of lung cancer in a Chinese population. *Lung Cancer* **62**, 281-286

- (2008).
447. Mei C, *et al.* Polymorphisms in DNA repair genes of XRCC1, XPA, XPC, XPD and associations with lung cancer risk in Chinese people. *Thoracic Cancer* **5**, 232-242 (2014).
  448. Mechanic LE, *et al.* Common genetic variation in TP53 is associated with lung cancer risk and prognosis in African Americans and somatic mutations in lung tumors. *Cancer Epidemiol Biomarkers Prev* **16**, 214-222 (2007).
  449. McKay JD, *et al.* Sequence variants of NAT1 and NAT2 and other xenometabolic genes and risk of lung and aerodigestive tract cancers in Central Europe. *Cancer Epidemiol Biomarkers Prev* **17**, 141-147 (2008).
  450. Matullo G, *et al.* DNA repair polymorphisms and cancer risk in non-smokers in a cohort study. *Carcinogenesis* **27**, 997-1007 (2006).
  451. Matakova T, *et al.* Gene polymorphisms of biotransforming enzymes (GSTs) and their association with lung cancer in the Slovakian population. *Eur J Med Res* **14 Suppl 4**, 275-279 (2009).
  452. Marsit CJ, Wiencke JK, Liu M, Kelsey KT. The race associated allele of Semaphorin 3B (SEMA3B) T415I and its role in lung cancer in African-Americans and Latino-Americans. *Carcinogenesis* **26**, 1446-1449 (2005).
  453. Marin MS, Lopez-Cima MF, Garcia-Castro L, Pascual T, Marron MG, Tardon A. Poly (AT) polymorphism in intron 11 of the XPC DNA repair gene enhances the risk of lung cancer. *Cancer Epidemiol Biomarkers Prev* **13**, 1788-1793 (2004).
  454. Marchand LL, Seifried A, Lum A, Wilkens LR. Association of the myeloperoxidase -463G-> A polymorphism with lung cancer risk. *Cancer Epidemiol Biomarkers Prev* **9**, 181-184 (2000).
  455. Mansoor Q, Fayyaz S, Farooqi AA, Bhatti S, Ismail M. Re-evaluating the FGFR4 (G388R) germline mutation in different cancers in Pakistani population. *J Exp Ther Oncol* **10**, 215-217 (2013).
  456. Manenti G, *et al.* A V141L polymorphism of the human LRMP gene is associated with survival of lung cancer patients. *Carcinogenesis* **27**, 1386-1390 (2006).
  457. Manenti G, *et al.* Association of chromosome 12p genetic polymorphisms with lung adenocarcinoma risk and prognosis. *Carcinogenesis* **18**, 1917-1920 (1997).
  458. Malats N, *et al.* Lung cancer risk in nonsmokers and GSTM1 and GSTT1 genetic polymorphism. *Cancer Epidemiol Biomarkers Prev* **9**, 827-833 (2000).
  459. Ma H, *et al.* Tagging single nucleotide polymorphisms in excision repair cross-complementing group 1 (ERCC1) and risk of primary lung cancer in a Chinese population. *Pharmacogenet Genomics* **17**, 417-423 (2007).
  460. Ma H, *et al.* ERCC6/CSB gene polymorphisms and lung cancer risk. *Cancer Lett* **273**, 172-176 (2009).
  461. Lubinski J, *et al.* The 3020insC allele of NOD2 predisposes to cancers of multiple organs. *Hered Cancer Clin Pract* **3**, 59-63 (2005).
  462. Lu X, *et al.* The SNP rs402710 in 5p15.33 Is Associated with Lung Cancer Risk: A Replication Study in Chinese Population and a Meta-Analysis. *PLoS One* **8**, (2013).
  463. Lu W, Xing D, Qi J, Tan W, Miao X, Lin D. Genetic polymorphism in myeloperoxidase but not GSTM1 is associated with risk of lung squamous cell carcinoma in a Chinese population. *Int J Cancer* **102**, 275-279 (2002).
  464. Lu J, *et al.* Functional characterization of a promoter polymorphism in APE1/Ref-1 that contributes to reduced lung cancer susceptibility. *FASEB J* **23**,

- 3459-3469 (2009).
465. Lu J, *et al.* The polymorphism and haplotypes of PIN1 gene are associated with the risk of lung cancer in Southern and Eastern Chinese populations. *Hum Mutat* **32**, 1299-1308 (2011).
466. Loriot MA, *et al.* Genetic polymorphisms of cytochrome P450 2A6 in a case-control study on lung cancer in a French population. *Pharmacogenetics* **11**, 39-44 (2001).
467. Lopez-Cima MF, *et al.* Polymorphisms in XPC, XPD, XRCC1, and XRCC3 DNA repair genes and lung cancer risk in a population of northern Spain. *BMC Cancer* **7**, 162 (2007).
468. Lopez-Cima MF, Alvarez-Avellon SM, Pascual T, Fernandez-Somoano A, Tardon A. Genetic polymorphisms in CYP1A1, GSTM1, GSTP1 and GSTT1 metabolic genes and risk of lung cancer in Asturias. *BMC Cancer* **12**, 433 (2012).
469. London SJ, Yuan JM, Coetzee GA, Gao YT, Ross RK, Yu MC. CYP1A1 I462V genetic polymorphism and lung cancer risk in a cohort of men in Shanghai, China. *Cancer Epidemiol Biomarkers Prev* **9**, 987-991 (2000).
470. London SJ, *et al.* Isothiocyanates, glutathione S-transferase M1 and T1 polymorphisms, and lung-cancer risk: a prospective study of men in Shanghai, China. *Lancet* **356**, 724-729 (2000).
471. London SJ, Sullivan-Klose T, Daly AK, Idle JR. Lung cancer risk in relation to the CYP2C9 genetic polymorphism among Caucasians in Los Angeles County. *Pharmacogenetics* **7**, 401-404 (1997).
472. London SJ, Smart J, Daly AK. Lung cancer risk in relation to genetic polymorphisms of microsomal epoxide hydrolase among African-Americans and Caucasians in Los Angeles County. *Lung Cancer* **28**, 147-155 (2000).
473. London SJ, Lehman TA, Taylor JA. Myeloperoxidase genetic polymorphism and lung cancer risk. *Cancer Res* **57**, 5001-5003 (1997).
474. London SJ, Daly AK, Leathart JB, Navidi WC, Idle JR. Lung cancer risk in relation to the CYP2C9\*1/CYP2C9\*2 genetic polymorphism among African-Americans and Caucasians in Los Angeles County, California. *Pharmacogenetics* **6**, 527-533 (1996).
475. London SJ, *et al.* Lung cancer risk in African-Americans in relation to a race-specific CYP1A1 polymorphism. *Cancer Res* **55**, 6035-6037 (1995).
476. London SJ, Daly AK, Cooper J, Navidi WC, Carpenter CL, Idle JR. Polymorphism of glutathione S-transferase M1 and lung cancer risk among African-Americans and Caucasians in Los Angeles County, California. *J Natl Cancer Inst* **87**, 1246-1253 (1995).
477. London SJ, *et al.* Lung cancer risk in relation to the CYP2E1 Rsa I genetic polymorphism among African-Americans and Caucasians in Los Angeles County. *Pharmacogenetics* **6**, 151-158 (1996).
478. Lo YL, *et al.* A polymorphism in the APE1 gene promoter is associated with lung cancer risk. *Cancer Epidemiol Biomarkers Prev* **18**, 223-229 (2009).
479. Lo YL, *et al.* ATM polymorphisms and risk of lung cancer among never smokers. *Lung Cancer* **69**, 148-154 (2010).
480. Lo YL, *et al.* Polymorphisms of MLH1 and MSH2 genes and the risk of lung cancer among never smokers. *Lung Cancer* **72**, 280-286 (2011).
481. Liu SG, Yuan SH, Wu HY, Huang CS, Liu J. The programmed cell death 6 interacting protein insertion/deletion polymorphism is associated with non-small cell lung cancer risk in a Chinese Han population. *Tumour Biol* **35**, 8679-8683

- (2014).
482. Liu L, *et al.* Variants in the 5'-upstream region of GPC5 confer risk of lung cancer in never smokers. *Cancer Epidemiol* **38**, 66-72 (2014).
  483. Liu L, *et al.* A functional polymorphism (-1607 1G->2G) in the matrix metalloproteinase-1 promoter is associated with development and progression of lung cancer. *Cancer* **117**, 5172-5181 (2011).
  484. Liu H, *et al.* Methyl-CpG binding domain 1 gene polymorphisms and lung cancer risk in a Chinese population. *Biomarkers* **13**, 607-617 (2008).
  485. Liu H, *et al.* Association of polymorphisms in one-carbon metabolizing genes and lung cancer risk: a case-control study in Chinese population. *Lung Cancer* **61**, 21-29 (2008).
  486. Liu H, Jiao Y, Guan Y, Lao Y, Zhao C, Fan H. The DNMT3B -579 G>T promoter polymorphism and risk of lung cancer. *Exp Ther Med* **3**, 525-529 (2012).
  487. Liu G, *et al.* MPO and SOD2 polymorphisms, gender, and the risk of non-small cell lung carcinoma. *Cancer Lett* **214**, 69-79 (2004).
  488. Liu G, *et al.* The SOD2 Val/Val genotype enhances the risk of nonsmall cell lung carcinoma by p53 and XRCC1 polymorphisms. *Cancer* **101**, 2802-2808 (2004).
  489. Liu G, *et al.* Genetic polymorphisms of MDM2, cumulative cigarette smoking and nonsmall cell lung cancer risk. *Int J Cancer* **122**, 915-918 (2008).
  490. Liu G, *et al.* Differential association of the codon 72 p53 and GSTM1 polymorphisms on histological subtype of non-small cell lung carcinoma. *Cancer Res* **61**, 8718-8722 (2001).
  491. Liu D, *et al.* Association of glutathione S-transferase M1 polymorphisms and lung cancer risk in a Chinese population. *Clin Chim Acta* **414**, 188-190 (2012).
  492. Liu D, *et al.* Association between p53 codon 72 genetic polymorphisms and tobacco use and lung cancer risk in a Chinese population. *Mol Biol Rep* **40**, 645-649 (2013).
  493. Liu D, Li L, Yang Y, Liu W, Wu J. The Axin2 rs2240308 polymorphism and susceptibility to lung cancer in a Chinese population. *Tumour Biol*, (2014).
  494. Liu CS, *et al.* Interaction of methylenetetrahydrofolate reductase genotype and smoking habit in Taiwanese lung cancer patients. *Cancer Genomics Proteomics* **6**, 325-329 (2009).
  495. Liu CJ, *et al.* Interaction of cyclooxygenase 2 genotype and smoking habit in Taiwanese lung cancer patients. *Anticancer Res* **30**, 1195-1199 (2010).
  496. Liu CJ, *et al.* The joint effect of hOGG1 single nucleotide polymorphism and smoking habit on lung cancer in Taiwan. *Anticancer Res* **30**, 4141-4145 (2010).
  497. Liu B, *et al.* A functional copy-number variation in MAPKAPK2 predicts risk and prognosis of lung cancer. *Am J Hum Genet* **91**, 384-390 (2012).
  498. Liu B, *et al.* A functional variant (-1304T>G) in the MKK4 promoter contributes to a decreased risk of lung cancer by increasing the promoter activity. *Carcinogenesis* **31**, 1405-1411 (2010).
  499. Lindstedt BA, Ryberg D, Zienolddiny S, Khan H, Haugen A. Hras1 VNTR alleles as susceptibility markers for lung cancer: relationship to microsatellite instability in tumors. *Anticancer Res* **19**, 5523-5527 (1999).
  500. Lind H, Zienolddiny S, Ryberg D, Skaug V, Phillips DH, Haugen A. Interleukin 1 receptor antagonist gene polymorphism and risk of lung cancer: a possible interaction with polymorphisms in the interleukin 1 beta gene. *Lung Cancer* **50**, 285-290 (2005).
  501. Lind H, Zienolddiny S, Ekstrom PO, Skaug V, Haugen A. Association of a functional polymorphism in the promoter of the MDM2 gene with risk of



- nonsmall cell lung cancer. *Int J Cancer* **119**, 718-721 (2006).
502. Lin Z, *et al.* A variant of the Cockayne syndrome B gene ERCC6 confers risk of lung cancer. *Hum Mutat* **29**, 113-122 (2008).
503. Lin P, *et al.* Association of CYP1A1 and microsomal epoxide hydrolase polymorphisms with lung squamous cell carcinoma. *Br J Cancer* **82**, 852-857 (2000).
504. Lin P, Hsueh YM, Ko JL, Liang YF, Tsai KJ, Chen CY. Analysis of NQO1, GSTP1, and MnSOD genetic polymorphisms on lung cancer risk in Taiwan. *Lung Cancer* **40**, 123-129 (2003).
505. Lin J, *et al.* Systematic evaluation of apoptotic pathway gene polymorphisms and lung cancer risk. *Carcinogenesis* **33**, 1699-1706 (2012).
506. Lin J, *et al.* CYP1A1 Ile462Val polymorphism and the risk of non-small cell lung cancer in a Chinese population. *Tumori* **100**, 547-552 (2014).
507. Lin IH, *et al.* Smoking, green tea consumption, genetic polymorphisms in the insulin-like growth factors and lung cancer risk. *PLoS One* **7**, e30951 (2012).
508. Lim YJ, *et al.* Epidermal growth factor gene polymorphism is different between schizophrenia and lung cancer patients in Korean population. *Neurosci Lett* **374**, 157-160 (2005).
509. Lim WY, *et al.* Female reproductive factors, gene polymorphisms in the estrogen metabolism pathway, and risk of lung cancer in Chinese women. *Am J Epidemiol* **175**, 492-503 (2012).
510. Lim WY, *et al.* Polymorphisms in inflammatory pathway genes, host factors and lung cancer risk in Chinese female never-smokers. *Carcinogenesis* **32**, 522-529 (2011).
511. Liloglou T, Walters M, Maloney P, Youngson J, Field JK. A T2517C polymorphism in the GSTM4 gene is associated with risk of developing lung cancer. *Lung Cancer* **37**, 143-146 (2002).
512. Liang J, *et al.* Vascular endothelial growth factor polymorphisms and risk of lung cancer. *Chinese-German Journal of Clinical Oncology* **8**, 269-272 (2009).
513. Liang J, *et al.* Relationship between gene polymorphisms of two cytokine genes (TNF-alpha and IL-6) and occurring of lung cancers in the ethnic group Han of China. *Mol Biol Rep* **40**, 1541-1546 (2013).
514. Liang G, *et al.* Sequence variations in the DNA repair gene XPD and risk of lung cancer in a Chinese population. *Int J Cancer* **105**, 669-673 (2003).
515. Liang G, Pu Y, Yin L. Rapid detection of single nucleotide polymorphisms related with lung cancer susceptibility of Chinese population. *Cancer Lett* **223**, 265-274 (2005).
516. Liang G, Miao X, Zhou Y, Tan W, Lin D. A functional polymorphism in the SULT1A1 gene (G638A) is associated with risk of lung cancer in relation to tobacco smoking. *Carcinogenesis* **25**, 773-778 (2004).
517. Li Z, *et al.* Genetic polymorphism of DNA base-excision repair genes (APE1, OGG1 and XRCC1) and their correlation with risk of lung cancer in a Chinese population. *Arch Med Res* **42**, 226-234 (2011).
518. Li Z, Bao S, Xu X, Bao Y, Zhang Y. Polymorphisms of CHRNA5-CHRNA3-CHRNA4 gene cluster and NSCLC risk in Chinese population. *Transl Oncol* **5**, 448-452 (2012).
519. Li Y, *et al.* Genetic polymorphism in the 3'-untranslated region of the E-cadherin gene is associated with risk of different cancers. *Mol Carcinog* **50**, 857-862 (2011).
520. Li Y, *et al.* Cystic fibrosis transmembrane conductance regulator gene mutation

- and lung cancer risk. *Lung Cancer* **70**, 14-21 (2010).
521. Li Y, *et al.* Correlation of polymorphisms of the vascular endothelial growth factor gene and the risk of lung cancer in an ethnic han group of North China. *Exp Ther Med* **3**, 673-676 (2012).
  522. Li Y, *et al.* Polymorphisms of CAK genes and risk for lung cancer: a case-control study in Chinese population. *Lung Cancer* **58**, 171-183 (2007).
  523. Li Y, *et al.* The role of leptin receptor gene polymorphisms in determining the susceptibility and prognosis of NSCLC in Chinese patients. *J Cancer Res Clin Oncol* **138**, 311-316 (2012).
  524. Li Y, *et al.* TP53 genetic polymorphisms, interactions with lifestyle factors and lung cancer risk: a case control study in a Chinese population. *BMC Cancer* **13**, 607 (2013).
  525. Li X, Zhang J, Su C, Zhao X, Tang L, Zhou C. The association between polymorphisms in the DNA nucleotide excision repair genes and RRM1 gene and lung cancer risk. *Thoracic Cancer* **3**, 239-248 (2012).
  526. Li X, Yang XX, Hu NY, Sun JZ, Li FX, Li M. A risk-associated single nucleotide polymorphism of SMAD7 is common to colorectal, gastric, and lung cancers in a Han Chinese population. *Mol Biol Rep* **38**, 5093-5097 (2011).
  527. Li X, *et al.* The interaction of APEX1 variant with polycyclic aromatic hydrocarbons on increasing chromosome damage and lung cancer risk among male Chinese. *Mol Carcinog*, (2014).
  528. Li X, *et al.* Interleukin-4 -590T/C polymorphism influences the susceptibility to nonsmall cell lung cancer. *DNA Cell Biol* **31**, 797-800 (2012).
  529. Li W, *et al.* Polymorphisms in GSTM1, CYP1A1, CYP2E1, and CYP2D6 are associated with susceptibility and chemotherapy response in non-small-cell lung cancer patients. *Lung* **190**, 91-98 (2012).
  530. Li M, *et al.* XRCC1 polymorphisms, cooking oil fume and lung cancer in Chinese women nonsmokers. *Lung Cancer* **62**, 145-151 (2008).
  531. Li Lian X, *et al.* The NAD(P)H:quinone oxidoreductase 1 gene polymorphism and lung cancer: Differential susceptibility based on smoking behavior. *Cancer Epidemiol Biomarkers Prev* **10**, 303-309 (2001).
  532. Li G, Zhai X, Zhang Z, Chamberlain RM, Spitz MR, Wei Q. MDM2 gene promoter polymorphisms and risk of lung cancer: a case-control analysis. *Carcinogenesis* **27**, 2028-2033 (2006).
  533. Li G, Wang LE, Chamberlain RM, Amos CI, Spitz MR, Wei Q. p73 G4C14-to-A4T14 polymorphism and risk of lung cancer. *Cancer Res* **64**, 6863-6866 (2004).
  534. Li C, Yin Z, Wu W, Li X, Ren Y, Zhou B. Genetic variations in TERT-CLPTM1L genes and risk of lung cancer in Chinese women nonsmokers. *PLoS One* **8**, e64988 (2013).
  535. Lewis SJ, Cherry NM, Niven RM, Barber PV, Povey AC. GSTM1, GSTT1 and GSTP1 polymorphisms and lung cancer risk. *Cancer Lett* **180**, 165-171 (2002).
  536. Lewis SJ, Cherry NM, Niven RM, Barber PV, Povey AC. Polymorphisms in the NAD(P)H: quinone oxidoreductase gene and small cell lung cancer risk in a UK population. *Lung Cancer* **34**, 177-183 (2001).
  537. Leng S, *et al.* Defining a gene promoter methylation signature in sputum for lung cancer risk assessment. *Clin Cancer Res* **18**, 3387-3395 (2012).
  538. Leng S, *et al.* Discovery of common SNPs in the miR-205/200 familyregulatedepithelial to mesenchymal transition pathway and their association with risk for non-small cell lung cancer. *Int J Mol Epidemiol Genet* **2**,

- 145-155 (2011).
539. Lener MR, *et al.* Prevalence of the NOD2 3020insC mutation in aggregations of breast and lung cancer. *Breast Cancer Res Treat* **95**, 141-145 (2006).
  540. Lei Z, *et al.* TGFBR1 haplotypes and risk of non-small-cell lung cancer. *Cancer Res* **69**, 7046-7052 (2009).
  541. Legrand-Andreolletti M, *et al.* Cytochrome P450 CYP2D6 gene polymorphism and lung cancer susceptibility in Caucasians. *Pharmacogenetics* **8**, 7-14 (1998).
  542. Legrand M, Stucker I, Marez D, Sabbagh N, Lo-Guidice JM, Broly F. Influence of a mutation reducing the catalytic activity of the cytochrome P450 CYP2D6 on lung cancer susceptibility. *Carcinogenesis* **17**, 2267-2269 (1996).
  543. Lee YL, *et al.* Association of genetic polymorphisms of CXCL12/SDF1 gene and its receptor, CXCR4, to the susceptibility and prognosis of non-small cell lung cancer. *Lung Cancer* **73**, 147-152 (2011).
  544. Lee YC, *et al.* A case-control study of the association of the polymorphisms and haplotypes of DNA ligase I with lung and upper-aerodigestive-tract cancers. *Int J Cancer* **122**, 1630-1638 (2008).
  545. Lee WK, *et al.* Polymorphisms in the Caspase7 gene and the risk of lung cancer. *Lung Cancer* **65**, 19-24 (2009).
  546. Lee SY, *et al.* Polymorphisms in the caspase genes and the risk of lung cancer. *J Thorac Oncol* **5**, 1152-1158 (2010).
  547. Lee SJ, *et al.* Vascular endothelial growth factor gene polymorphisms and risk of primary lung cancer. *Cancer Epidemiol Biomarkers Prev* **14**, 571-575 (2005).
  548. Lee SJ, *et al.* DNMT3B polymorphisms and risk of primary lung cancer. *Carcinogenesis* **26**, 403-409 (2005).
  549. Lee KM, *et al.* Polymorphisms in immunoregulatory genes, smoky coal exposure and lung cancer risk in Xuan Wei, China. *Carcinogenesis* **28**, 1437-1441 (2007).
  550. Lee KM, *et al.* Interactive effect of genetic polymorphism of glutathione S-transferase M1 and smoking on squamous cell lung cancer risk in Korea. *Oncol Rep* **16**, 1035-1039 (2006).
  551. Lee JA, *et al.* Association of low activity of UGT1A7 with Lung Cancer in Taiwan: A preliminary case control study. *Journal of Food and Drug Analysis* **19**, 403-409+538 (2011).
  552. Lee J, Dahl M, Nordestgaard BG. Genetically lowered microsomal epoxide hydrolase activity and tobacco-related cancer in 47,000 individuals. *Cancer Epidemiol Biomarkers Prev* **20**, 1673-1682 (2011).
  553. Lee GY, *et al.* XPC polymorphisms and lung cancer risk. *Int J Cancer* **115**, 807-813 (2005).
  554. Lee CN, *et al.* NAT2 fast acetylator genotypes are associated with an increased risk for lung cancer with wildtype epidermal growth factor receptors in Taiwan. *Lung Cancer* **64**, 9-12 (2009).
  555. Le Marchand L, *et al.* Associations of CYP1A1, GSTM1, and CYP2E1 polymorphisms with lung cancer suggest cell type specificities to tobacco carcinogens. *Cancer Res* **58**, 4858-4863 (1998).
  556. Le Marchand L, Seifried A, Lum A, Wilkens LR. Association of the myeloperoxidase -463G-->a polymorphism with lung cancer risk. *Cancer Epidemiol Biomarkers Prev* **9**, 181-184 (2000).
  557. Le Marchand L, Donlon T, Lum-Jones A, Seifried A, Wilkens LR. Association of the hOGG1 Ser326Cys polymorphism with lung cancer risk. *Cancer Epidemiol Biomarkers Prev* **11**, 409-412 (2002).
  558. Lawson KA, Woodson K, Virtamo J, Albanes D. Association of the

- NAD(P)H:quinone oxidoreductase (NQO1) 609C->T polymorphism with lung cancer risk among male smokers. *Cancer Epidemiol Biomarkers Prev* **14**, 2275-2276 (2005).
559. Larsen JE, Colosimo ML, Yang IA, Bowman R, Zimmerman PV, Fong KM. CYP1A1 Ile462Val and MPO G-463A interact to increase risk of adenocarcinoma but not squamous cell carcinoma of the lung. *Carcinogenesis* **27**, 525-532 (2006).
560. Larsen JE, Colosimo ML, Yang IA, Bowman R, Zimmerman PV, Fong KM. Risk of non-small cell lung cancer and the cytochrome P4501A1 Ile462Val polymorphism. *Cancer Causes Control* **16**, 579-585 (2005).
561. Landvik NE, Hart K, Skaug V, Stangeland LB, Haugen A, Zienolddiny S. A specific interleukin-1B haplotype correlates with high levels of IL1B mRNA in the lung and increased risk of non-small cell lung cancer. *Carcinogenesis* **30**, 1186-1192 (2009).
562. Landi S, *et al.* DNA repair and cell cycle control genes and the risk of young-onset lung cancer. *Cancer Res* **66**, 11062-11069 (2006).
563. Lan Q, *et al.* Smoky coal exposure, NBS1 polymorphisms, p53 protein accumulation, and lung cancer risk in Xuan Wei, China. *Lung Cancer* **49**, 317-323 (2005).
564. Lan Q, *et al.* Oxidative damage-related genes AKR1C3 and OGG1 modulate risks for lung cancer due to exposure to PAH-rich coal combustion emissions. *Carcinogenesis* **25**, 2177-2181 (2004).
565. Lan Q, He X. Molecular epidemiological studies on the relationship between indoor coal burning and lung cancer in Xuan Wei, China. *Toxicology* **198**, 301-305 (2004).
566. Lan Q, *et al.* Longer telomere length in peripheral white blood cells is associated with risk of lung cancer and the rs2736100 (CLPTM1L-TERT) polymorphism in a prospective cohort study among women in China. *PLoS One* **8**, e59230 (2013).
567. Lam TK, *et al.* Copy number variants of GSTM1 and GSTT1 in relation to lung cancer risk in a prospective cohort study. *Ann Epidemiol* **19**, 546-552 (2009).
568. Laforest L, *et al.* CYP2D6 gene polymorphism in caucasian smokers: lung cancer susceptibility and phenotype-genotype relationships. *Eur J Cancer* **36**, 1825-1832 (2000).
569. Kuo WH, *et al.* Association of hypoxia inducible factor-1alpha polymorphisms with susceptibility to non-small-cell lung cancer. *Transl Res* **159**, 42-50 (2012).
570. Kumimoto H, *et al.* L-myc genotype is associated with different susceptibility to lung cancer in smokers. *Jpn J Cancer Res* **93**, 1-5 (2002).
571. Kumar M, Agarwal SK, Goel SK. Lung cancer risk in north Indian population: role of genetic polymorphisms and smoking. *Mol Cell Biochem* **322**, 73-79 (2009).
572. Kua LF, *et al.* UGT1A6 polymorphisms modulated lung cancer risk in a Chinese population. *PLoS One* **7**, e42873 (2012).
573. Krzesniak M, Butkiewicz D, Samojedny A, Chorazy M, Rusin M. Polymorphisms in TDG and MGMT genes - epidemiological and functional study in lung cancer patients from Poland. *Ann Hum Genet* **68**, 300-312 (2004).
574. Krontiris TG, Devlin B, Karp DD, Robert NJ, Risch N. An association between the risk of cancer and mutations in the HRAS1 minisatellite locus. *N Engl J Med* **329**, 517-523 (1993).
575. Korosec B, Glavac D, Volavsek M, Ravnik-Glavac M. ATP2A3 gene is involved in cancer susceptibility. *Cancer Genet Cytogenet* **188**, 88-94 (2009).

576. Konac E, *et al.* Genetic variations in the hypoxia-inducible factor-1alpha gene and lung cancer. *Exp Biol Med (Maywood)* **234**, 1109-1116 (2009).
577. Kohno T, *et al.* Association of polymorphisms in the MTH1 gene with small cell lung carcinoma risk. *Carcinogenesis* **27**, 2448-2454 (2006).
578. Kohno T, *et al.* Association of the OGG1-Ser326Cys polymorphism with lung adenocarcinoma risk. *Cancer Sci* **97**, 724-728 (2006).
579. Kohno T, *et al.* Association of KRAS polymorphisms with risk for lung adenocarcinoma accompanied by atypical adenomatous hyperplasias. *Carcinogenesis* **29**, 957-963 (2008).
580. Kohno T, *et al.* Contribution of the TP53, OGG1, CHRNA3, and HLA-DQA1 genes to the risk for lung squamous cell carcinoma. *J Thorac Oncol* **6**, 813-817 (2011).
581. Kohno T, *et al.* Association of CYP19A1 polymorphisms with risks for atypical adenomatous hyperplasia and bronchioloalveolar carcinoma in the lungs. *Carcinogenesis* **31**, 1794-1799 (2010).
582. Klinchid J, Chewaskulyoung B, Saeteng S, Lertprasertsuke N, Kasinrerak W, Cressey R. Effect of combined genetic polymorphisms on lung cancer risk in northern Thai women. *Cancer Genet Cytogenet* **195**, 143-149 (2009).
583. Kiyohara C, Wakai K, Mikami H, Sido K, Ando M, Ohno Y. Risk modification by CYP1A1 and GSTM1 polymorphisms in the association of environmental tobacco smoke and lung cancer: a case-control study in Japanese nonsmoking women. *Int J Cancer* **107**, 139-144 (2003).
584. Kiyohara C, Takayama K, Nakanishi Y. CYP2A13, CYP2A6, and the risk of lung adenocarcinoma in a Japanese population. *Journal of Health Science* **51**, 658-666 (2005).
585. Kiyohara C, Horiuchi T, Takayama K, Nakanishi Y. Genetic polymorphisms involved in the inflammatory response and lung cancer risk: a case-control study in Japan. *Cytokine* **65**, 88-94 (2014).
586. Kiyohara C, Horiuchi T, Takayama K, Nakanishi Y. Genetic polymorphisms involved in carcinogen metabolism and DNA repair and lung cancer risk in a Japanese population. *J Thorac Oncol* **7**, 954-962 (2012).
587. Kiyohara C, Horiuchi T, Takayama K, Nakanishi Y. Methylenetetrahydrofolate reductase polymorphisms and interaction with smoking and alcohol consumption in lung cancer risk: a case-control study in a Japanese population. *BMC Cancer* **11**, 459 (2011).
588. Kiyohara C, Horiuchi T, Takayama K, Nakanishi Y. IL1B rs1143634 polymorphism, cigarette smoking, alcohol use, and lung cancer risk in a Japanese population. *J Thorac Oncol* **5**, 299-304 (2010).
589. Kiyohara C, Horiuchi T, Miyake Y, Takayama K, Nakanishi Y. Cigarette smoking, TP53 Arg72Pro, TP53BP1 Asp353Glu and the risk of lung cancer in a Japanese population. *Oncol Rep* **23**, 1361-1368 (2010).
590. Kim MJ, Yoo SS, Choi YY, Park JY. A functional polymorphism in the pre-microRNA-196a2 and the risk of lung cancer in a Korean population. *Lung Cancer* **69**, 127-129 (2010).
591. Kim JS, *et al.* Association of a common AGO1 variant with lung cancer risk: a two-stage case-control study. *Mol Carcinog* **49**, 913-921 (2010).
592. Kim JH, *et al.* Aryl hydrocarbon receptor gene polymorphisms affect lung cancer risk. *Lung Cancer* **56**, 9-15 (2007).
593. Kim JH, *et al.* Genetic polymorphisms of ataxia telangiectasia mutated affect lung cancer risk. *Hum Mol Genet* **15**, 1181-1186 (2006).

594. Kim IS, *et al.* Polymorphisms and haplotypes in the XRCC1 gene and the risk of advanced non-small cell lung cancer. *J Thorac Oncol* **5**, 1912-1921 (2010).
595. Kim HK, *et al.* A study of RET proto-oncogene polymorphisms in association with lung cancer risk in the Korean population. *Anticancer Res* **30**, 3621-3627 (2010).
596. Kim DH, *et al.* A functional single nucleotide polymorphism at the promoter region of cyclin A2 is associated with increased risk of colon, liver, and lung cancers. *Cancer* **117**, 4080-4091 (2011).
597. Kihara M, Noda K, Kihara M. Distribution of GSTM1 null genotype in relation to gender, age and smoking status in Japanese lung cancer patients. *Pharmacogenetics* **5 Spec No**, S74-79 (1995).
598. Kihara M, Kihara M, Noda K. Lung cancer risk of the GSTM1 null genotype is enhanced in the presence of the GSTP1 mutated genotype in male Japanese smokers. *Cancer Lett* **137**, 53-60 (1999).
599. Kihara M, Kihara M, Noda K. Risk of smoking for squamous and small cell carcinomas of the lung modulated by combinations of CYP1A1 and GSTM1 gene polymorphisms in a Japanese population. *Carcinogenesis* **16**, 2331-2336 (1995).
600. Khaghanzadeh N, Erfani N, Ghayumi MA, Ghaderi A. CTLA4 gene variations and haplotypes in patients with lung cancer. *Cancer Genet Cytogenet* **196**, 171-174 (2010).
601. Kelsey KT, Wiencke JK, Spitz MR. A race-specific genetic polymorphism in the CYP1A1 gene is not associated with lung cancer in African Americans. *Carcinogenesis* **15**, 1121-1124 (1994).
602. Ke J, *et al.* Replication study in Chinese population and meta-analysis supports association of the 5p15.33 locus with lung cancer. *PLoS One* **8**, e62485 (2013).
603. Kawajiri K, Watanabe J, Eguchi H, Nakachi K, Kiyohara C, Hayashi S. Polymorphisms of human Ah receptor gene are not involved in lung cancer. *Pharmacogenetics* **5**, 151-158 (1995).
604. Kawajiri K, Nakachi K, Imai K, Watanabe J, Hayashi S. Germ line polymorphisms of p53 and CYP1A1 genes involved in human lung cancer. *Carcinogenesis* **14**, 1085-1089 (1993).
605. Kaur-Knudsen D, Bojesen SE, Tybjaerg-Hansen A, Nordestgaard BG. Nicotinic acetylcholine receptor polymorphism, smoking behavior, and tobacco-related cancer and lung and cardiovascular diseases: a cohort study. *J Clin Oncol* **29**, 2875-2882 (2011).
606. Kaur TB, Travaline JM, Gaughan JP, Richie JP, Jr., Stellman SD, Lazarus P. Role of polymorphisms in codons 143 and 160 of the O6-alkylguanine DNA alkyltransferase gene in lung cancer risk. *Cancer Epidemiol Biomarkers Prev* **9**, 339-342 (2000).
607. Katoh T, *et al.* Human glutathione S-transferase P1 polymorphism and susceptibility to smoking related epithelial cancer; oral, lung, gastric, colorectal and urothelial cancer. *Pharmacogenetics* **9**, 165-169 (1999).
608. Kato S, *et al.* Analysis of cytochrome P450 2E1 genetic polymorphisms in relation to human lung cancer. *Cancer Epidemiol Biomarkers Prev* **3**, 515-518 (1994).
609. Kato S, *et al.* Cytochrome P450IIE1 genetic polymorphisms, racial variation, and lung cancer risk. *Cancer Res* **52**, 6712-6715 (1992).
610. Katafigiotis S, *et al.* A case-control study on the rs3130932 single nucleotide polymorphism in the OCT4B translation initiation codon in association with

- cancer state. *Eur J Cancer Prev* **20**, 248-251 (2011).
611. Karkucak M, *et al.* XRCC1 gene polymorphisms and risk of lung cancer in Turkish patients. *Int J Hum Genet* **12**, 113-117 (2012).
612. Karahalil B, Emerce E, Kocer B, Han S, Alkis N, Karakaya AE. The association of OGG1 Ser326Cys polymorphism and urinary 8-OHdG levels with lung cancer susceptibility: a hospital-based case-control study in Turkey. *Arh Hig Rada Toksikol* **59**, 241-250 (2008).
613. Karabon L, *et al.* CTLA-4, CD28, and ICOS gene polymorphism associations with non-small-cell lung cancer. *Hum Immunol* **72**, 947-954 (2011).
614. Kanzaki H, *et al.* Single nucleotide polymorphism of the AXIN2 gene is preferentially associated with human lung cancer risk in a Japanese population. *Int J Mol Med* **18**, 279-284 (2006).
615. Kanzaki H, *et al.* The association between RAD18 Arg302Gln polymorphism and the risk of human non-small-cell lung cancer. *J Cancer Res Clin Oncol* **134**, 211-217 (2008).
616. Kanzaki H, *et al.* Single nucleotide polymorphism at codon 133 of the RASSF1 gene is preferentially associated with human lung adenocarcinoma risk. *Cancer Lett* **238**, 128-134 (2006).
617. Kantarci OH, *et al.* Myeloperoxidase -463 (G->A) polymorphism associated with lower risk of lung cancer. *Mayo Clin Proc* **77**, 17-22 (2002).
618. Kant Shukla R, Kant S, Mittal B, Bhattacharya S. Comparative study of GST polymorphism in relation to age in COPD and lung cancer. *Tuberkuloz ve Toraks* **61**, 275-282 (2013).
619. Kang HG, *et al.* Identification of polymorphisms in the XIAP gene and analysis of association with lung cancer risk in a Korean population. *Cancer Genet Cytogenet* **180**, 6-13 (2008).
620. Kang HG, *et al.* +61A>G polymorphism in the EGF gene does not increase the risk of lung cancer. *Respirology* **12**, 902-905 (2007).
621. Kang HG, *et al.* Polymorphisms in TGF-beta1 gene and the risk of lung cancer. *Lung Cancer* **52**, 1-7 (2006).
622. Kaabachi W, Amor AB, Kaabachi S, Rafrafi A, Tizaoui K, Hamzaoui K. Interleukin-17A and -17F genes polymorphisms in lung cancer. *Cytokine* **66**, 23-29 (2014).
623. Kaabachi S, Kaabachi W, Rafrafi A, Belkis H, Hamzaoui K, Haj Sassi F. Tumor necrosis factor gene polymorphisms in Tunisian patients with non-small cell lung cancer. *Clinical Laboratory* **59**, 1389-1395 (2013).
624. Jung HY, *et al.* Lack of association of fragile histidine triad (FHIT) polymorphisms with lung cancer in the Korean population. *J Hum Genet* **52**, 668-674 (2007).
625. Jun HJ, *et al.* Combined effects of p73 and MDM2 polymorphisms on the risk of lung cancer. *Mol Carcinog* **46**, 100-105 (2007).
626. Jourenkova-Mironova N, *et al.* Role of glutathione S-transferase GSTM1, GSTM3, GSTP1 and GSTT1 genotypes in modulating susceptibility to smoking-related lung cancer. *Pharmacogenetics* **8**, 495-502 (1998).
627. Jou YS, *et al.* Association of an EGFR intron 1 SNP with never-smoking female lung adenocarcinoma patients. *Lung Cancer* **64**, 251-256 (2009).
628. Jones NR, Spratt TE, Berg AS, Muscat JE, Lazarus P, Gallagher CJ. Association studies of excision repair cross-complementation group 1 (ERCC1) haplotypes with lung and head and neck cancer risk in a Caucasian population. *Cancer Epidemiol* **35**, 175-181 (2011).

629. Jo U, *et al.* The genetic polymorphisms of HER-2 and the risk of lung cancer in a Korean population. *BMC Cancer* **8**, (2008).
630. Jin Y, *et al.* Combined effects of serum trace metals and polymorphisms of CYP1A1 or GSTM1 on non-small cell lung cancer: a hospital based case-control study in China. *Cancer Epidemiol* **35**, 182-187 (2011).
631. Jin Y, *et al.* Combined effects of cigarette smoking, gene polymorphisms and methylations of tumor suppressor genes on non small cell lung cancer: a hospital-based case-control study in China. *BMC Cancer* **10**, 422 (2010).
632. Jin X, *et al.* Higher lung cancer risk for younger African-Americans with the Pro/Pro p53 genotype. *Carcinogenesis* **16**, 2205-2208 (1995).
633. Jin G, *et al.* Common genetic variants on 5p15.33 contribute to risk of lung adenocarcinoma in a Chinese population. *Carcinogenesis* **30**, 987-990 (2009).
634. Jin G, *et al.* Potentially functional polymorphisms of EXO1 and risk of lung cancer in a Chinese population: A case-control analysis. *Lung Cancer* **60**, 340-346 (2008).
635. Jiang Y, *et al.* Functional regulatory variants of MCL1 contribute to enhanced promoter activity and reduced risk of lung cancer in nonsmokers: implications for context-dependent phenotype of an antiapoptotic and antiproliferative gene in solid tumor. *Cancer* **118**, 2085-2095 (2012).
636. Jiang M, Wu H, Qin C. Genetic variant rs401681 at 5p15.33 modifies susceptibility to lung cancer but not esophageal squamous cell carcinoma. *PLoS One* **8**, e84277 (2013).
637. Jiang B, *et al.* STAT3 gene polymorphisms and susceptibility to non-small cell lung cancer. *Genet Mol Res* **10**, 1856-1865 (2011).
638. Jia Y, *et al.* MicroRNA-146a rs2910164 polymorphism is associated with susceptibility to non-small cell lung cancer in the Chinese population. *Med Oncol* **31**, (2014).
639. Ahn MJ, *et al.* A single nucleotide polymorphism in the phospholipase D1 gene is associated with risk of non-small cell lung cancer. *Int J Biomed Sci* **8**, 121-128 (2012).
640. Ahn MJ, *et al.* The 18p11.22 locus is associated with never smoker non-small cell lung cancer susceptibility in Korean populations. *Hum Genet* **131**, 365-372 (2012).
641. Aksoy-Sagirli P, *et al.* Paraoxonase-1 192/55 polymorphisms and the risk of lung cancer in a Turkish population. *Anticancer Res* **31**, 2225-2229 (2011).
642. Aldrich MC, *et al.* CYP1A1/2 haplotypes and lung cancer and assessment of confounding by population stratification. *Cancer Res* **69**, 2340-2348 (2009).
643. Alexandrie AK, Nyberg F, Warholm M, Rannug A. Influence of CYP1A1, GSTM1, GSTT1, and NQO1 genotypes and cumulative smoking dose on lung cancer risk in a Swedish population. *Cancer Epidemiol Biomarkers Prev* **13**, 908-914 (2004).
644. Alexandrie AK, Sundberg MI, Seidegard J, Tornling G, Rannug A. Genetic susceptibility to lung cancer with special emphasis on CYP1A1 and GSTM1: a study on host factors in relation to age at onset, gender and histological cancer types. *Carcinogenesis* **15**, 1785-1790 (1994).
645. Al-Tassan N, *et al.* Inherited variants in MYH are unlikely to contribute to the risk of lung carcinoma. *Hum Genet* **114**, 207-210 (2004).
646. Altinisik J, Balta ZB, Aydin G, Ulutin T, Buyru N. Investigation of glutathione S-transferase M1 and T1 deletions in lung cancer. *Mol Biol Rep* **37**, 263-267 (2010).



647. Amos CI, *et al.* Nicotinic acetylcholine receptor region on chromosome 15q25 and lung cancer risk among African Americans: a case-control study. *J Natl Cancer Inst* **102**, 1199-1205 (2010).
648. An S, *et al.* Mutation and polymorphism in the tyrosine kinase domain of KDR in Chinese human lung cancer patients. *Chinese-German Journal of Clinical Oncology* **8**, 309-313 (2009).
649. An SJ, *et al.* The -271 G>A polymorphism of kinase insert domain-containing receptor gene regulates its transcription level in patients with non-small cell lung cancer. *BMC Cancer* **9**, 144 (2009).
650. An Y, *et al.* Polymorphisms in hMLH1 and risk of early-onset lung cancer in a southeast Chinese population. *Lung Cancer* **59**, 164-170 (2008).
651. Antczak A, *et al.* Ctl-4 expression and polymorphisms in lung tissue of patients with diagnosed non-small-cell lung cancer. *Biomed Res Int* **2013**, 576486 (2013).
652. Araki J, *et al.* Polymorphism of UDP-glucuronosyltransferase 1A7 gene: a possible new risk factor for lung cancer. *Eur J Cancer* **41**, 2360-2365 (2005).
653. Arslan S, Karadayi S, Yildirim ME, Ozdemir O, Akkurt I. The association between methylene-tetrahydrofolate reductase gene polymorphism and lung cancer risk. *Mol Biol Rep* **38**, 991-996 (2011).
654. Arslan S, Pinarbasi H, Silig Y. Myeloperoxidase G-463A polymorphism and risk of lung and prostate cancer in a Turkish population. *Mol Med Rep* **4**, 87-92 (2011).
655. Arslan S, Silig Y, Pinarbasi H. An investigation of the relationship between SULT1A1 Arg(213)His polymorphism and lung cancer susceptibility in a Turkish population. *Cell Biochem Funct* **27**, 211-215 (2009).
656. Asada M, *et al.* Interleukin-1beta gene polymorphisms associated with risk of lung cancer in Japanese. *Lung Cancer* **54**, 261-263 (2006).
657. Atinkaya C, *et al.* The effect of CYP1A1, GSTT1 and GSTM1 polymorphisms on the risk of lung cancer: a case-control study. *Hum Exp Toxicol* **31**, 1074-1080 (2012).
658. Aynaci E, *et al.* Association between survivin gene promoter -31G/C and -644C/T polymorphisms and non-small cell lung cancer. *Genet Mol Res* **12**, 3975-3982 (2013).
659. Aysegul B, Veysi GH, Muzaffer M, Irfan D, Azra A, Hulyam K. Is a single nucleotide polymorphism a risk factor for lung cancer in the matrix metalloproteinase-2 promoter? *Mol Biol Rep* **38**, 1469-1474 (2011).
660. Bae EY, *et al.* Replication of results of genome-wide association studies on lung cancer susceptibility loci in a Korean population. *Respirology* **17**, 699-706 (2012).
661. Bai J, Li X, Tong D, Shi W, Song H, Li Q. T-cell immunoglobulin- and mucin-domain-containing molecule 3 gene polymorphisms and prognosis of non-small-cell lung cancer. *Tumour Biol* **34**, 805-809 (2013).
662. Bai L, Yu H, Wang H, Su H, Zhao J, Zhao Y. Genetic single-nucleotide polymorphisms of inflammation-related factors associated with risk of lung cancer. *Med Oncol* **30**, 414 (2013).
663. Bai Y, *et al.* Sequence variations in DNA repair gene XPC is associated with lung cancer risk in a Chinese population: a case-control study. *BMC Cancer* **7**, 81 (2007).
664. Bao WL, Shi H, Zhang AQ, Kong XM, Deng DH, Zhang YJ. Lack of associations of polymorphisms of IL-7R, IL-13 and IL-15 with NSCLCs in non-smoking Chinese. *Asian Pac J Cancer Prev* **12**, 3239-3244 (2011).

665. Bayramoglu A, *et al.* Plasminogen activator inhibitor-1 and susceptibility to lung cancer: A population genetics perspective. *Genet Test Mol Biomarkers* **18**, 587-590 (2014).
666. Bayramoglu A, Gunes HV, Metintas M, Degirmenci I, Mutlu F, Alatas F. The association of MMP-9 enzyme activity, MMP-9 C1562T polymorphism, and MMP-2 and -9 and TIMP-1, -2, -3, and -4 gene expression in lung cancer. *Genet Test Mol Biomarkers* **13**, 671-678 (2009).
667. B'Chir F, Pavanello S, Knani J, Boughattas S, Arnaud MJ, Saguem S. CYP1A2 genetic polymorphisms and adenocarcinoma lung cancer risk in the Tunisian population. *Life Sci* **84**, 779-784 (2009).
668. Belogubova EV, *et al.* 'Comparison of extremes' approach provides evidence against the modifying role of NAT2 polymorphism in lung cancer susceptibility. *Cancer Lett* **221**, 177-183 (2005).
669. Belogubova EV, *et al.* A novel approach for assessment of cancer predisposing roles of GSTM1 and GSTT1 genes: use of putatively cancer resistant elderly tumor-free smokers as the referents. *Lung Cancer* **43**, 259-266 (2004).
670. Belogubova EV, *et al.* Combined CYP1A1/GSTM1 at-risk genotypes are overrepresented in squamous cell lung carcinoma patients but underrepresented in elderly tumor-free subjects. *J Cancer Res Clin Oncol* **132**, 327-331 (2006).
671. Benhamou S, Reinikainen M, Bouchardy C, Dayer P, Hirvonen A. Association between lung cancer and microsomal epoxide hydrolase genotypes. *Cancer Res* **58**, 5291-5293 (1998).
672. Benhamou S, Voho A, Bouchardy C, Mitrunen K, Dayer P, Hirvonen A. Role of NAD(P)H:quinone oxidoreductase polymorphism at codon 187 in susceptibility to lung, laryngeal and oral/pharyngeal cancers. *Biomarkers* **6**, 440-447 (2001).
673. Bhat IA, *et al.* Association of interleukin 1 beta (IL-1(beta)) polymorphism with mRNA expression and risk of non small cell lung cancer. *Meta Gene* **2**, 123-133 (2014).
674. Bhat IA, *et al.* Lack of association of a common polymorphism in the 3' -UTR of interleukin 8 with non small cell lung cancer in Kashmir. *Asian Pac J Cancer Prev* **14**, 4403-4408 (2013).
675. Bhat IA, *et al.* COX-2 overexpression and -8473 T/C polymorphism in 3' UTR in non-small cell lung cancer. *Tumour Biol*, (2014).
676. Bianchino G, *et al.* Polymorphisms of the CYP1A1, CYP2E1 and XRCC1 genes and cancer risk in a Southern Italian population: A case-control study. *Anticancer Res* **31**, 1359-1365 (2011).
677. Biondi ML, *et al.* MMP1 and MMP3 polymorphisms in promoter regions and cancer. *Clin Chem* **46**, 2023-2024 (2000).
678. Birgander R, *et al.* P53 polymorphisms and haplotypes in lung cancer. *Carcinogenesis* **16**, 2233-2236 (1995).
679. Biros E, *et al.* Polymorphism of the p53 gene within the codon 72 in lung cancer patients. *Neoplasma* **48**, 407-411 (2001).
680. Biros E, Kalina I, Kohut A, Stubna J, Salagovic J. Germ line polymorphisms of the tumor suppressor gene p53 and lung cancer. *Lung Cancer* **31**, 157-162 (2001).
681. Bo W, *et al.* A newfound association between MDC1 functional polymorphism and lung cancer risk in Chinese. *PLoS One* **9**, (2014).
682. Bouchardy C, *et al.* N-acetyltransferase NAT1 and NAT2 genotypes and lung cancer risk. *Pharmacogenetics* **8**, 291-298 (1998).
683. Bowman ED. Chromosome 13 poly(ADP-ribose) polymerase polymorphisms

- and lung cancer risk. *Oncol Rep* **4**, 269-272 (1997).
684. Brockmoller J, Kerb R, Drakoulis N, Nitz M, Roots I. Genotype and phenotype of glutathione S-transferase class mu isoenzymes mu and psi in lung cancer patients and controls. *Cancer Res* **53**, 1004-1011 (1993).
  685. Buch SC, *et al.* Genetic variability in DNA repair and cell cycle control pathway genes and risk of smoking-related lung cancer. *Mol Carcinog* **51 Suppl 1**, E11-20 (2012).
  686. Butkiewicz D, *et al.* Association between the risk for lung adenocarcinoma and a (-4) G-to-A polymorphism in the XPA gene. *Cancer Epidemiol Biomarkers Prev* **13**, 2242-2246 (2004).
  687. Butkiewicz D, Rusin M, Enewold L, Shields PG, Chorazy M, Harris CC. Genetic polymorphisms in DNA repair genes and risk of lung cancer. *Carcinogenesis* **22**, 593-597 (2001).
  688. Buyru N, Altinisik J, Isin M, Dalay N. p53 codon 72 polymorphism and HPV status in lung cancer. *Med Sci Monit* **14**, Cr493-497 (2008).
  689. Cabral RE, Caldeira-de-Araujo A, Cabral-Neto JB, Costa Carvalho Mda G. Analysis of GSTM1 and GSTT1 polymorphisms in circulating plasma DNA of lung cancer patients. *Mol Cell Biochem* **338**, 263-269 (2010).
  690. Caceres DD, Quinones LA, Schroeder JC, Gil LD, Irrarrazabal CE. Association between p53 codon 72 genetic polymorphism and tobacco use and lung cancer risk. *Lung* **187**, 110-115 (2009).
  691. Cajas-Salazar N, *et al.* Effect of epoxide hydrolase polymorphisms on chromosome aberrations and risk for lung cancer. *Cancer Genet Cytogenet* **145**, 97-102 (2003).
  692. Cajas-Salazar N, Sierra-Torres CH, Salama SA, Zwischenberger JB, Au WW. Combined effect of MP0, GSTM1 and GSTT1 polymorphisms on chromosome aberrations and lung cancer risk. *Int J Hyg Environ Health* **206**, 473-483 (2003).
  693. Cakina S, Gulyasar T, Ozen A, Sipahi T, Kocak Z, Sener S. Relationship between cyclin D1 (A870G) gene polymorphism and lung cancer. *Indian J Biochem Biophys* **50**, 233-236 (2013).
  694. Campa D, *et al.* Lack of association between polymorphisms in inflammatory genes and lung cancer risk. *Cancer Epidemiol Biomarkers Prev* **14**, 538-539 (2005).
  695. Campa D, *et al.* Lack of association between -251 T>A polymorphism of IL8 and lung cancer risk. *Cancer Epidemiol Biomarkers Prev* **14**, 2457-2458 (2005).
  696. Campa D, *et al.* Polymorphisms of dopamine receptor/transporter genes and risk of non-small cell lung cancer. *Lung Cancer* **56**, 17-23 (2007).
  697. Campa D, Zienolddiny S, Maggini V, Skaug V, Haugen A, Canzian F. Association of a common polymorphism in the cyclooxygenase 2 gene with risk of non-small cell lung cancer. *Carcinogenesis* **25**, 229-235 (2004).
  698. Cantlay AM, *et al.* Association between the CYP1A1 gene polymorphism and susceptibility to emphysema and lung cancer. *Clin Mol Pathol* **48**, M210-M214 (1995).
  699. Cao B, *et al.* Lack of association between the unique LMP2 gene polymorphism and the outcome of lung cancer in a population of Chinese Han nationality. *Hum Immunol* **73**, 580-584 (2012).
  700. Cao G, Lu H, Feng J, Shu J, Zheng D, Hou Y. Lung cancer risk associated with thr495pro polymorphism of GHR in chines population. *Jpn J Clin Oncol* **38**, 308-316 (2008).
  701. Cao L, *et al.* A regulatory variant in CYP2E1 affects the risk of lung squamous

- cell carcinoma. *Tumour Biol* **35**, 455-462 (2014).
702. Carpenter CL, Yu MC, London SJ. Dietary isothiocyanates, glutathione S-transferase M1 (GSTM1), and lung cancer risk in African Americans and Caucasians from Los Angeles County, California. *Nutr Cancer* **61**, 492-499 (2009).
  703. Cascorbi I, Brockmoller J, Mrozikiewicz PM, Bauer S, Loddenkemper R, Roots I. Homozygous rapid arylamine N-acetyltransferase (NAT2) genotype as a susceptibility factor for lung cancer. *Cancer Res* **56**, 3961-3966 (1996).
  704. Cascorbi I, Brockmoller J, Roots I. A C4887A polymorphism in exon 7 of human CYP1A1: population frequency, mutation linkages, and impact on lung cancer susceptibility. *Cancer Res* **56**, 4965-4969 (1996).
  705. Catarino R, *et al.* Cyclin D1 polymorphism in non-small cell lung cancer in a Portuguese population. *Cancer Biomark* **12**, 65-72 (2012).
  706. Cauchi S, Stucker I, Cenee S, Kremers P, Beaune P, Massaad-Massade L. Structure and polymorphisms of human aryl hydrocarbon receptor repressor (AhRR) gene in a French population: relationship with CYP1A1 inducibility and lung cancer. *Pharmacogenetics* **13**, 339-347 (2003).
  707. Cauchi S, *et al.* Polymorphisms of human aryl hydrocarbon receptor (AhR) gene in a French population: relationship with CYP1A1 inducibility and lung cancer. *Carcinogenesis* **22**, 1819-1824 (2001).
  708. Cauffiez C, *et al.* Genetic polymorphism of the human cytochrome CYP2A13 in a French population: implication in lung cancer susceptibility. *Biochem Biophys Res Commun* **317**, 662-669 (2004).
  709. Chae MH, *et al.* O6-alkylguanine-DNA alkyltransferase gene polymorphisms and the risk of primary lung cancer. *Mol Carcinog* **45**, 239-249 (2006).
  710. Chan EC, Lam SY, Fu KH, Kwong YL. Polymorphisms of the GSTM1, GSTP1, MPO, XRCC1, and NQO1 genes in Chinese patients with non-small cell lung cancers: relationship with aberrant promoter methylation of the CDKN2A and RARB genes. *Cancer Genet Cytogenet* **162**, 10-20 (2005).
  711. Chang CH, *et al.* Interactive effect of cigarette smoking with human 8-oxoguanine DNA N-glycosylase 1 (hOGG1) polymorphisms on the risk of lung cancer: a case-control study in Taiwan. *Am J Epidemiol* **170**, 695-702 (2009).
  712. Chang FH, *et al.* Genetic polymorphism of T6235C mutation in 3' non-coding region of CYP1A1 and GSTM1 genes and lung cancer susceptibility in the Mongolian population. *Acad J Xian Jiaotong Univ* **21**, 225-229 (2009).
  713. Chang HL, *et al.* Association of estrogen receptor (alpha) gene PvuII and XbaI polymorphisms with non-small cell lung cancer. *Oncol Lett* **3**, 462-468 (2012).
  714. Chang JS, *et al.* Nucleotide excision repair genes and risk of lung cancer among San Francisco Bay Area Latinos and African Americans. *Int J Cancer* **123**, 2095-2104 (2008).
  715. Chang JS, *et al.* Base excision repair genes and risk of lung cancer among San Francisco Bay Area Latinos and African-Americans. *Carcinogenesis* **30**, 78-87 (2009).
  716. Chang YL, *et al.* Association of insulin receptor substrate-1 G972R variant with non-small cell lung cancer risk. *Tuberc Respir Dis (Seoul)* **67**, 8-13 (2009).
  717. Chan-Yeung M, *et al.* Lung cancer susceptibility and polymorphisms of glutathione-S-transferase genes in Hong Kong. *Lung Cancer* **45**, 155-160 (2004).
  718. Che J, *et al.* Polymorphism in PHD1 gene and risk of non-small cell lung cancer in a Chinese population. *Tumour Biol* **35**, 8921-8925 (2014).

719. Chen D, *et al.* Genetic variants in peroxisome proliferator-activated receptor-gamma gene are associated with risk of lung cancer in a Chinese population. *Carcinogenesis* **29**, 342-350 (2008).
720. Chen D, *et al.* Association of human aryl hydrocarbon receptor gene polymorphisms with risk of lung cancer among cigarette smokers in a Chinese population. *Pharmacogenet Genomics* **19**, 25-34 (2009).
721. Chen H, Lum A, Seifried A, Wilkens LR, Marchand LL. Association of the NAD(P)H:quinone oxidoreductase 609C->T polymorphism with a decreased lung cancer risk. *Cancer Res* **59**, 3045-3048 (1999).
722. Chen J, *et al.* A two-SNP IL-6 promoter haplotype is associated with increased lung cancer risk. *J Cancer Res Clin Oncol* **139**, 231-242 (2013).
723. Chen KY, *et al.* EGFR polymorphisms, hormone replacement therapy and lung adenocarcinoma risk: analysis from a genome-wide association study in never-smoking women. *Carcinogenesis* **34**, 612-619 (2013).
724. Chen S, *et al.* DNA repair gene XRCC1 and XPD polymorphisms and risk of lung cancer in a Chinese population. *Carcinogenesis* **23**, 1321-1325 (2002).
725. Chen S, Xue K, Xu L, Ma G, Wu J. Polymorphisms of the CYP1A1 and GSTM1 genes in relation to individual susceptibility to lung carcinoma in Chinese population. *Mutat Res* **458**, 41-47 (2001).
726. Chen WC, *et al.* The contribution of DNA apurinic/aprimidinic endonuclease genotype and smoking habit to Taiwan lung cancer risk. *Anticancer Res* **33**, 2775-2778 (2013).
727. Chen XF, *et al.* Multiple variants of TERT and CLPTM1L constitute risk factors for lung adenocarcinoma. *Genet Mol Res* **11**, 370-378 (2012).
728. Chen Y, Liu H, Wu W, Li Y, Li J. Osteopontin genetic variants are associated with overall survival in advanced non-small-cell lung cancer patients and bone metastasis. *J Exp Clin Cancer Res* **32**, 45 (2013).
729. Chen YZ, *et al.* Single-nucleotide polymorphisms of LIG1 associated with risk of lung cancer. *Tumour Biol* **35**, 9229-9232 (2014).
730. Cheng M, *et al.* A microRNA-135a/b binding polymorphism in CD133 confers decreased risk and favorable prognosis of lung cancer in Chinese by reducing CD133 expression. *Carcinogenesis* **34**, 2292-2299 (2013).
731. Cheng TJ, Christiani DC, Wiencke JK, Wain JC, Xu X, Kelsey KT. Comparison of sister chromatid exchange frequency in peripheral lymphocytes in lung cancer cases and controls. *Mutat Res* **348**, 75-82 (1995).
732. Cheng Z, Wang W, Dai LL, Kang Y. MTHFR C667T polymorphism association with lung cancer risk in Henan province: a case-control study. *Asian Pac J Cancer Prev* **13**, 2491-2494 (2012).
733. Cheon KT, Choi KH, Lee HB, Park SK, Rhee YK, Lee YC. Gene polymorphisms of endothelial nitric oxide synthase and angiotensin-converting enzyme in patients with lung cancer. *Lung* **178**, 351-360 (2000).
734. Chernitsa OI, Togo AV, Shutkin VA, Hanson KP, Imyanitov EN. S allele of L-MYC oncogene is associated with metastatic lung cancer in patients from Moldova. *Eur J Cancer* **34**, 1816-1817 (1998).
735. Chevrier I, *et al.* Myeloperoxidase: new polymorphisms and relation with lung cancer risk. *Pharmacogenetics* **13**, 729-739 (2003).
736. Chi YJ, *et al.* Polymorphisms in the hMSH2 gene and the risk of primary lung cancer. *Cancer Epidemiol Biomarkers Prev* **15**, 762-768 (2006).
737. Chin LJ, *et al.* A SNP in a let-7 microRNA complementary site in the KRAS 3' untranslated region increases non-small cell lung cancer risk. *Cancer Res* **68**,

- 8535-8540 (2008).
738. Chiou HL, *et al.* NAT2 fast acetylator genotype is associated with an increased risk of lung cancer among never-smoking women in Taiwan. *Cancer Lett* **223**, 93-101 (2005).
739. Choi HS, *et al.* Single-nucleotide polymorphisms in the promoter of the CDK5 gene and lung cancer risk in a Korean population. *J Hum Genet* **54**, 298-303 (2009).
740. Choi JE, *et al.* No association between p73 G4C14-to-A4T14 polymorphism and the risk of lung cancer in a Korean population. *Biochem Genet* **44**, 543-550 (2006).
741. Choi JE, *et al.* Polymorphisms in telomere maintenance genes and risk of lung cancer. *Cancer Epidemiol Biomarkers Prev* **18**, 2773-2781 (2009).
742. Choi JE, *et al.* Polymorphisms in the epidermal growth factor receptor gene and the risk of primary lung cancer: a case-control study. *BMC Cancer* **7**, 199 (2007).
743. Choi YY, *et al.* Comprehensive assessment of P21 polymorphisms and lung cancer risk. *J Hum Genet* **53**, 87-95 (2008).
744. Chua HW, *et al.* Effect of MDM2 SNP309 and p53 codon 72 polymorphisms on lung cancer risk and survival among non-smoking Chinese women in Singapore. *BMC Cancer* **10**, 88 (2010).
745. Chujo M, Noguchi T, Miura T, Arinaga M, Uchida Y, Tagawa Y. Comparative genomic hybridization analysis detected frequent overrepresentation of chromosome 3q in squamous cell carcinoma of the lung. *Lung Cancer* **38**, 23-29 (2002).
746. Church TR, *et al.* Interaction of CYP1B1, cigarette-smoke carcinogen metabolism, and lung cancer risk. *Int J Mol Epidemiol Genet* **1**, 295-309 (2010).
747. Colakogullari M, *et al.* The involvement of IL-10, IL-6, IFN-gamma, TNF-alpha and TGF-beta gene polymorphisms among Turkish lung cancer patients. *Cell Biochem Funct* **26**, 283-290 (2008).
748. Coskunpinar E, *et al.* The significance of HSP90AA1, HSP90AB1 and HSP90B1 gene polymorphisms in a Turkish population with non-small cell lung cancer. *Anticancer Res* **34**, 753-757 (2014).
749. Coskunpinar E, Eraltan IY, Turna A, Agachan B. Cyclooxygenase-2 gene and lung carcinoma risk. *Med Oncol* **28**, 1436-1440 (2011).
750. Cote ML, *et al.* Combinations of cytochrome P-450 genotypes and risk of early-onset lung cancer in Caucasians and African Americans: a population-based study. *Lung Cancer* **55**, 255-262 (2007).
751. Cote ML, *et al.* Tobacco and estrogen metabolic polymorphisms and risk of non-small cell lung cancer in women. *Carcinogenesis* **30**, 626-635 (2009).
752. Crosbie PA, *et al.* GSTM1 copy number and lung cancer risk. *Mutat Res* **664**, 1-5 (2009).
753. Crosbie PA, *et al.* Association between lung cancer risk and single nucleotide polymorphisms in the first intron and codon 178 of the DNA repair gene, O6-alkylguanine-DNA alkyltransferase. *Int J Cancer* **122**, 791-795 (2008).
754. Cui E, *et al.* The role of adiponectin (ADIPOQ) gene polymorphisms in the susceptibility and prognosis of non-small cell lung cancer. *Biochem Cell Biol* **89**, 308-313 (2011).
755. Cui LH, *et al.* Methylenetetrahydrofolate reductase C677T polymorphism in patients with lung cancer in a Korean population. *BMC Med Genet* **12**, 28 (2011).
756. Cui LH, Yu Z, Zhang TT, Shin MH, Kim HN, Choi JS. Influence of

- polymorphisms in MTHFR 677 C-->T, TYMS 3R-->2R and MTR 2756 A-->G on NSCLC risk and response to platinum-based chemotherapy in advanced NSCLC. *Pharmacogenomics* **12**, 797-808 (2011).
757. Cybulski C, *et al.* Constitutional CHEK2 mutations are associated with a decreased risk of lung and laryngeal cancers. *Carcinogenesis* **29**, 762-765 (2008).
758. Dai X, Liu Z, Ren J, Wu G. Association between insulin-like growth factor binding protein-3 promoter polymorphism of -1590 C>A and lung cancer susceptibility in a Chinese Han population. *Genet Test Mol Biomarkers* **15**, 301-306 (2011).
759. Dally H, *et al.* Genotype relationships in the CYP3A locus in Caucasians. *Cancer Lett* **207**, 95-99 (2004).
760. Dally H, *et al.* The CYP3A4\*1B allele increases risk for small cell lung cancer: effect of gender and smoking dose. *Pharmacogenetics* **13**, 607-618 (2003).
761. Dally H, *et al.* Myeloperoxidase (MPO) genotype and lung cancer histologic types: the MPO -463 A allele is associated with reduced risk for small cell lung cancer in smokers. *Int J Cancer* **102**, 530-535 (2002).
762. David-Beabes GL, London SJ. Genetic polymorphism of XRCC1 and lung cancer risk among African-Americans and Caucasians. *Lung Cancer* **34**, 333-339 (2001).
763. David-Beabes GL, Lunn RM, London SJ. No association between the XPD (Lys751Gln) polymorphism or the XRCC3 (Thr241Met) polymorphism and lung cancer risk. *Cancer Epidemiol Biomarkers Prev* **10**, 911-912 (2001).
764. de Mello RA, *et al.* Association between EGF +61 genetic polymorphisms and non-small cell lung cancer increased risk in a Portuguese population: a case-control study. *Tumour Biol* **33**, 1341-1348 (2012).
765. de Mello RA, *et al.* The impact of polymorphic variations in the 5p15, 6p12, 6p21 and 15q25 Loci on the risk and prognosis of portuguese patients with non-small cell lung cancer. *PLoS One* **8**, e72373 (2013).
766. De Ruyck K, *et al.* Polymorphisms in base-excision repair and nucleotide-excision repair genes in relation to lung cancer risk. *Mutat Res* **631**, 101-110 (2007).
767. Debniak T, *et al.* CDKN2A common variant and multi-organ cancer risk - A population-based study. *Int J Cancer* **118**, 3180-3182 (2006).
768. Demir A, Altin S, Demir I, Koksall V, Cetincelik U, Dincer I. The role of CYP1A1 MspI gene polymorphisms on lung cancer development in Turkey. *Tuberk Toraks* **53**, 5-9 (2005).
769. Demir A, Altin S, Demir I, Koksall V, Cetincelik U, Dincer SI. The frequency of GSTT1 null genotype in Turkish population and lung cancer risk. *Indian J Hum Genet* **11**, 89-93 (2005).
770. Demir A, *et al.* The role of GSTM1 gene polymorphisms in lung cancer development in Turkish population. *J Carcinog* **6**, (2007).
771. Demirkan A, *et al.* CYP1A1, GSTM1 and NQO1 gene polymorphisms: Genetic risk factors for small cell lung cancer. *Turkish Journal of Cancer* **35**, 171-176 (2005).
772. Deng D, Zhang Y, Bao W, Kong X. Low-density lipoprotein receptor-related protein 6 (LRP6) rs10845498 polymorphism is associated with a decreased risk of non-small cell lung cancer. *Int J Med Sci* **11**, 685-690 (2014).
773. Deng Q, *et al.* Genetic polymorphisms in ATM, ERCC1, APE1 and iASPP genes and lung cancer risk in a population of southeast China. *Med Oncol* **28**, 667-672

- (2011).
774. Devic Pavlic S, Ristic S, Flego V, Kapovic M, Radojic Badovinac A. Angiotensin-converting enzyme insertion/deletion gene polymorphism in lung cancer patients. *Genet Test Mol Biomarkers* **16**, 722-725 (2012).
775. Dialyna IA, Miyakis S, Georgatou N, Spandidos DA. Genetic polymorphisms of CYP1A1, GSTM1 and GSTT1 genes and lung cancer risk. *Oncol Rep* **10**, 1829-1835 (2003).
776. Dogan I, *et al.* Polymorphisms in the aurora-A gene is not associated with lung cancer in the Turkish population. *DNA Cell Biol* **27**, 443-448 (2008).
777. Dogan I, *et al.* Polymorphisms in the vitamin D receptor gene and risk of lung cancer. *Med Sci Monit* **15**, Br232-242 (2009).
778. Dolzan V, Rudolf Z, Breskvar K. Human CYP2D6 gene polymorphism in Slovene cancer patients and healthy controls. *Carcinogenesis* **16**, 2675-2678 (1995).
779. Dolzan V, Rudolf Z, Breskvar K. Genetic polymorphism of xenobiotic metabolising enzymes in Slovenian lung cancer patients. *Pflugers Arch* **439**, R29-30 (2000).
780. Domanska D, *et al.* STAT3 rs3816769 polymorphism correlates with gene expression level and may predispose to nonsmall cell lung cancer: A preliminary study. *Pol Arch Med Wewn* **123**, 672-679 (2013).
781. Dragani TA, *et al.* Population-based mapping of pulmonary adenoma susceptibility 1 locus. *Cancer Res* **60**, 5017-5020 (2000).
782. Drakoulis N, Cascorbi I, Brockmoller J, Gross CR, Roots I. Polymorphisms in the human CYP1A1 gene as susceptibility factors for lung cancer: exon-7 mutation (4889 A to G), and a T to C mutation in the 3'-flanking region. *Clin Invest* **72**, 240-248 (1994).
783. Dresler CM, Fratelli C, Babb J, Everley L, Evans AA, Clapper ML. Gender differences in genetic susceptibility for lung cancer. *Lung Cancer* **30**, 153-160 (2000).
784. Dzian A, *et al.* Lung adenocarcinoma and squamous cell carcinoma in association with genetic polymorphisms of GSTs in Slovak population. *Neoplasma* **59**, 160-167 (2012).
785. el-Zein R, Zwischenberger JB, Wood TG, Abdel-Rahman SZ, Brekelbaum C, Au WW. Combined genetic polymorphism and risk for development of lung cancer. *Mutat Res* **381**, 189-200 (1997).
786. Enewold L, Mechanic LE, Bowman ED, Platz EA, Alberg AJ. Association of matrix metalloproteinase-1 polymorphisms with risk of COPD and lung cancer and survival in lung cancer. *Anticancer Res* **32**, 3917-3922 (2012).
787. Enewold L, Mechanic LE, Bowman ED, Platz EA, Alberg AJ. SERPINA1 and ELA2 polymorphisms are not associated with COPD or lung cancer. *Anticancer Res* **32**, 3923-3928 (2012).
788. Engels EA, Wu X, Gu J, Dong Q, Liu J, Spitz MR. Systematic evaluation of genetic variants in the inflammation pathway and risk of lung cancer. *Cancer Res* **67**, 6520-6527 (2007).
789. Enokida Y, *et al.* Single-nucleotide polymorphism (c.309T>G) in the MDM2 gene and lung cancer risk. *Biomedical Reports* **2**, 719-724 (2014).
790. Eom SY, *et al.* Influence of NQO1, ALDH2, and CYP2E1 genetic polymorphisms, smoking, and alcohol drinking on the risk of lung cancer in Koreans. *Cancer Causes Control* **20**, 137-145 (2009).
791. Eren A, *et al.* Investigation of possible relationship between survivin gene



- promoter polymorphisms and lung cancer. *Clin Genet* **78**, 72 (2010).
792. Erfani N, Nedaei Ahmadi AS, Ghayumi MA, Mojtahedi Z. Genetic polymorphisms of CCL22 and CCR4 in patients with lung cancer. *Iran J Med Sci* **39**, 367-373 (2014).
793. Erkisi Z, Yaylim-Eraltan I, Turna A, Gormus U, Camlica H, Isbir T. Polymorphisms in the microsomal epoxide hydrolase gene: role in lung cancer susceptibility and prognosis. *Tumori* **96**, 756-763 (2010).
794. Ewis AA, *et al.* Surfactant protein B gene variations and susceptibility to lung cancer in chromate workers. *Am J Ind Med* **49**, 367-373 (2006).
795. Fakhoury H, Noureddine S, Chmaisse HN, Tamim H, Makki RF. MMP1-1607(1G>2G) polymorphism and the risk of lung cancer in Lebanon. *Ann Thorac Med* **7**, 130-132 (2012).
796. Fakhoury HM, Noureddine S, Tamim H, Chmaisse H, Makki R. Association of MMP3-1171(5A>6A) polymorphism with lung cancer in Lebanon. *Genet Test Mol Biomarkers* **16**, 988-990 (2012).
797. Falvella FS, *et al.* Transcription deregulation at the 15q25 locus in association with lung adenocarcinoma risk. *Clin Cancer Res* **15**, 1837-1842 (2009).
798. Falvella FS, *et al.* Common polymorphisms in D12S1034 flanking genes RASSF8 and BHLHB3 are not associated with lung adenocarcinoma risk. *Lung Cancer* **56**, 1-7 (2007).
799. Fan R, *et al.* The p53 codon 72 polymorphism and lung cancer risk. *Cancer Epidemiol Biomarkers Prev* **9**, 1037-1042 (2000).
800. Fang HM, Tian G, Zhou LJ, Zhou HY, Fang YZ. FGFR4 genetic polymorphisms determine the chemotherapy response of Chinese patients with non-small cell lung cancer. *Acta Pharmacol Sin* **34**, 549-554 (2013).
801. Fang S, *et al.* Polymorphisms in the MMP1 and MMP3 promoter and non-small cell lung carcinoma in North China. *Carcinogenesis* **26**, 481-486 (2005).
802. Fang W, *et al.* The functional polymorphism of NBS1 p.Glu185Gln is associated with an increased risk of lung cancer in Chinese populations: Case-control and a meta-analysis. *Mutat Res* **770**, 61-68 (2014).
803. Fang X, *et al.* Genetic variation in an miRNA-1827 binding site in MYCL1 alters susceptibility to small-cell lung cancer. *Cancer Res* **71**, 5175-5181 (2011).
804. Farjadfar A, Mojtahedi Z, Ghayumi MA, Erfani N, Haghshenas MR, Ghaderi A. Interleukin-18 promoter polymorphism is associated with lung cancer: a case-control study. *Acta Oncol* **48**, 971-976 (2009).
805. Fathy M, Hamed M, Youssif O, Fawzy N, Ashour W. Association between environmental tobacco smoke exposure and lung cancer susceptibility: modification by antioxidant enzyme genetic polymorphisms. *Mol Diagn Ther* **18**, 55-62 (2014).
806. Fatma B, Aida T, Maurice JA, Saguem S. Glutathione S-transferase M1 and T1, CYP1A2-2467T/delT polymorphisms and non small-cell lung cancer risk in Tunisian sample. *Egyptian Journal of Medical Human Genetics* **13**, 307-312 (2012).
807. Fernandez-Rubio A, *et al.* The TP53 Arg72Pro polymorphism and lung cancer risk in a population of Northern Spain. *Lung Cancer* **61**, 309-316 (2008).
808. Feyler A, *et al.* Point: myeloperoxidase -463G --> a polymorphism and lung cancer risk. *Cancer Epidemiol Biomarkers Prev* **11**, 1550-1554 (2002).
809. Flego V, *et al.* Tumor necrosis factor-alpha gene promoter -308 and -238 polymorphisms in patients with lung cancer as a second primary tumor. *Med Sci Monit* **19**, 846-851 (2013).

810. Ford JG, *et al.* Glutathione S-transferase M1 polymorphism and lung cancer risk in African-Americans. *Carcinogenesis* **21**, 1971-1975 (2000).
811. Fujieda M, *et al.* Evaluation of CYP2A6 genetic polymorphisms as determinants of smoking behavior and tobacco-related lung cancer risk in male Japanese smokers. *Carcinogenesis* **25**, 2451-2458 (2004).
812. Gabrielsen ME, Romundstad P, Langhammer A, Krokan HE, Skorpen F. Association between a 15q25 gene variant, nicotine-related habits, lung cancer and COPD among 56,307 individuals from the HUNT study in Norway. *Eur J Hum Genet* **21**, 1293-1299 (2013).
813. Gallagher CJ, *et al.* The UDP-glucuronosyltransferase 2B17 gene deletion polymorphism: sex-specific association with urinary 4-(methylnitrosamino)-1-(3-pyridyl)-1-butanol glucuronidation phenotype and risk for lung cancer. *Cancer Epidemiol Biomarkers Prev* **16**, 823-828 (2007).
814. Gallegos-Arreola MP, *et al.* CYP1A1 \*2B and \*4 polymorphisms are associated with lung cancer susceptibility in Mexican patients. *Int J Biol Markers* **23**, 24-30 (2008).
815. Gallegos-Arreola MP, *et al.* GSTT1 gene deletion is associated with lung cancer in Mexican patients. *Dis Markers* **19**, 259-261 (2003).
816. Galvan A, *et al.* Genome-wide association study in discordant sibships identifies multiple inherited susceptibility alleles linked to lung cancer. *Carcinogenesis* **31**, 462-465 (2010).
817. Gao M, *et al.* The relationship between three well-characterized polymorphisms of the angiotensin converting enzyme gene and lung cancer risk: a case-control study and a meta-analysis. *J Renin Angiotensin Aldosterone Syst* **13**, 455-460 (2012).
818. Gao Y, Zhang Q. Polymorphisms of the GSTM1 and CYP2D6 genes associated with susceptibility to lung cancer in Chinese. *Mutat Res* **444**, 441-449 (1999).
819. Garcia-Closas M, Kelsey KT, Wiencke JK, Xu X, Wain JC, Christiani DC. A case-control study of cytochrome P450 1A1, glutathione S-transferase M1, cigarette smoking and lung cancer susceptibility (Massachusetts, United States). *Cancer Causes Control* **8**, 544-553 (1997).
820. Garcia-Martin E, Martinez C, Ladero JM, Gamito FJ, Rodriguez-Lescure A, Agundez JA. Influence of cytochrome P450 CYP2C9 genotypes in lung cancer risk. *Cancer Lett* **180**, 41-46 (2002).
821. Gaspar P, Moreira J, Kvitko K, Torres M, Moreira A, de Azevedo Weimer T. CYP1A1, CYP2E1, GSTM1, GSTT1, GSTP1, and TP53 polymorphisms: Do they indicate susceptibility to chronic obstructive pulmonary disease and non-small-cell lung cancer? *Genet Mol Biol* **27**, 133-138 (2004).
822. Gautschi O, *et al.* Cyclin D1 (CCND1) A870G gene polymorphism modulates smoking-induced lung cancer risk and response to platinum-based chemotherapy in non-small cell lung cancer (NSCLC) patients. *Lung Cancer* **51**, 303-311 (2006).
823. Ge H, *et al.* Detection and evaluation of p53 intron 2 polymorphism in lung carcinomas in Hong Kong. *Int J Cancer* **69**, 120-124 (1996).
824. Gervasini G, Carrillo JA, Garcia M, San Jose C, Cabanillas A, Benitez J. Adenosine triphosphate-binding cassette B1 (ABCB1) (multidrug resistance 1) G2677T/A gene polymorphism is associated with high risk of lung cancer. *Cancer* **107**, 2850-2857 (2006).
825. Gervasini G, *et al.* Haplotypes in the 5'-untranslated region of the CYP1A2 gene are inversely associated with lung cancer risk but do not correlate with caffeine

- metabolism. *Environ Mol Mutagen* **54**, 124-132 (2013).
826. Gervasini G, Jose CS, Carrillo JA, Benitez J, Cabanillas A. GST polymorphisms interact with dietary factors to modulate lung cancer risk: Study in a high-incidence area. *Nutr Cancer* **62**, 750-758 (2010).
827. Golmoghaddam H, Pezeshki AM, Ghaderi A, Doroudchi M. CD1a and CD1d genes polymorphisms in breast, colorectal and lung cancers. *Pathol Oncol Res* **17**, 669-675 (2011).
828. Gomes M, Coelho A, Araujo A, Teixeira AL, Catarino R, Medeiros R. Influence of functional genetic polymorphism (-590C/T) in non-small cell lung cancer (NSCLC) development: the paradoxal role of IL-4. *Gene* **504**, 111-115 (2012).
829. Gonzalez-Arriaga P, *et al.* Polymorphism +17 C/G in matrix metalloprotease MMP8 decreases lung cancer risk. *BMC Cancer* **8**, 378 (2008).
830. Gonzalez-Arriaga P, Pascual T, Garcia-Alvarez A, Fernandez-Somoano A, Lopez-Cima MF, Tardon A. Genetic polymorphisms in MMP 2, 9 and 3 genes modify lung cancer risk and survival. *BMC Cancer* **12**, 121 (2012).
831. Gorlov IP, *et al.* Seizure 6-like (SEZ6L) gene and risk for lung cancer. *Cancer Res* **67**, 8406-8411 (2007).
832. Gormus U, *et al.* Fas-1377 A/G polymorphism in lung cancer. *In Vivo* **21**, 663-666 (2007).
833. Gromowski T, *et al.* Prevalence of the E318K and V320I MITF germline mutations in Polish cancer patients and multiorgan cancer risk-a population-based study. *Cancer Genet* **207**, 128-132 (2014).
834. Gruber M, *et al.* UDP-glucuronosyltransferase 2B17 genotype and the risk of lung cancer among Austrian Caucasians. *Cancer Epidemiol* **37**, 625-628 (2013).
835. Gsur A, *et al.* Genetic polymorphisms of CYP1A1 and GSTM1 and lung cancer risk. *Anticancer Res* **21**, 2237-2242 (2001).
836. Gsur A, *et al.* Association of microsomal epoxide hydrolase polymorphisms and lung cancer risk. *Br J Cancer* **89**, 702-706 (2003).
837. Gu J, Gong Y, Huang M, Lu C, Spitz MR, Wu X. Polymorphisms of STK15 (Aurora-A) gene and lung cancer risk in Caucasians. *Carcinogenesis* **28**, 350-355 (2007).
838. Gu J, Shen Y, Zhang Y. Association between interleukin-4 polymorphisms and environment and nonsmall cell lung cancer in Chinese population. *J Cancer Res Ther* **10**, C135-C139 (2014).
839. Gu J, Spitz MR, Yang F, Wu X. Ethnic differences in poly(ADP-ribose) polymerase pseudogene genotype distribution and association with lung cancer risk. *Carcinogenesis* **20**, 1465-1469 (1999).
840. Gu J, *et al.* A nonsynonymous single-nucleotide polymorphism in the PDZ-Rho guanine nucleotide exchange factor (Ser1416Gly) modulates the risk of lung cancer in Mexican Americans. *Cancer* **106**, 2716-2724 (2006).
841. Guan X, Wang LE, Liu Z, Sturgis EM, Wei Q. Association between a rare novel TP53 variant (rs78378222) and melanoma, squamous cell carcinoma of head and neck and lung cancer susceptibility in non-Hispanic Whites. *J Cell Mol Med* **17**, 873-878 (2013).
842. Gunes EG, Pinarbasi E, Pinarbasi H, Silig Y. Strong association between lung cancer and the AXIN2 polymorphism. *Mol Med Rep* **2**, 1029-1035 (2009).
843. Guo H, *et al.* Functional promoter -1271G>C variant of HSPB1 predicts lung cancer risk and survival. *J Clin Oncol* **28**, 1928-1935 (2010).
844. Guo H, *et al.* Variations in HSPA1B at 6p21.3 are associated with lung cancer risk and prognosis in Chinese populations. *Cancer Res* **71**, 7576-7586 (2011).

845. Guo S, *et al.* Synergistic association of PTGS2 and CYP2E1 genetic polymorphisms with lung cancer risk in northeastern Chinese. *PLoS One* **7**, e39814 (2012).
846. Guo S, Li X, Gao M, Li Y, Song B, Niu W. The relationship between XRCC1 and XRCC3 gene polymorphisms and lung cancer risk in northeastern Chinese. *PLoS One* **8**, e56213 (2013).
847. Guo Y, *et al.* Functional evaluation of missense variations in the human MAD1L1 and MAD2L1 genes and their impact on susceptibility to lung cancer. *J Med Genet* **47**, 616-622 (2010).
848. Habalova V, Salagovic J, Kalina I, Stubna J. A pilot study testing the genetic polymorphism of N-acetyltransferase 2 as a risk factor in lung cancer. *Neoplasma* **52**, 364-368 (2005).
849. Hagihara M, Shimura T, Sato K, Genga K, Suzuki M, Tsuji K. HLA and tumor necrosis factor beta gene polymorphisms in Okinawa lung cancer patients: comparative study with mainland Japan lung cancer patients. *Hum Immunol* **43**, 95-100 (1995).
850. Hamada GS, *et al.* The heme-binding region polymorphism of cytochrome P450IA1 (CypIA1), rather than the RsaI polymorphism of IIE1 (CypIIE1), is associated with lung cancer in Rio de Janeiro. *Cancer Epidemiol Biomarkers Prev* **4**, 63-67 (1995).
851. Hamajima N, *et al.* NAD(P)H: quinone oxidoreductase 1 (NQO1) C609T polymorphism and the risk of eight cancers for Japanese. *Int J Clin Oncol* **7**, 103-108 (2002).
852. Han SG, *et al.* Single nucleotide polymorphisms of IGFBP-3 gene and lung cancer risk in a Korean population. *Lung Cancer* **62**, 152-161 (2008).
853. Hao B, *et al.* A novel T-77C polymorphism in DNA repair gene XRCC1 contributes to diminished promoter activity and increased risk of non-small cell lung cancer. *Oncogene* **25**, 3613-3620 (2006).
854. Harms C, Salama SA, Sierra-Torres CH, Cajas-Salazar N, Au WW. Polymorphisms in DNA repair genes, chromosome aberrations, and lung cancer. *Environ Mol Mutagen* **44**, 74-82 (2004).
855. Hart K, Landvik NE, Lind H, Skaug V, Haugen A, Zienolddiny S. A combination of functional polymorphisms in the CASP8, MMP1, IL10 and SEPS1 genes affects risk of non-small cell lung cancer. *Lung Cancer* **71**, 123-129 (2011).
856. Hayashi SI, Watanabe J, Kawajiri K. High susceptibility to lung cancer analyzed in terms of combined genotypes of P450IA1 and mu-class glutathione S-transferase genes. *Jpn J Cancer Res* **83**, 866-870 (1992).
857. He F, Chang SC, Wallar GM, Zhang ZF, Cai L. Association of XRCC3 and XRCC4 gene polymorphisms, family history of cancer and tobacco smoking with non-small-cell lung cancer in a Chinese population: a case-control study. *J Hum Genet* **58**, 679-685 (2013).
858. He P, *et al.* CHRNA3 polymorphism modifies lung adenocarcinoma risk in the Chinese Han population. *Int J Mol Sci* **15**, 5446-5457 (2014).
859. He YQ, Bo Q, Yong W, Qiu ZX, Li YL, Li WM. FoxP3 genetic variants and risk of non-small cell lung cancer in the Chinese Han population. *Gene* **531**, 422-425 (2013).
860. He YQ, Zhou B, Shi SQ, Zhang L, Li WM. Genetic variation in PDCD6 and susceptibility to lung cancer. *Asian Pac J Cancer Prev* **13**, 4689-4693 (2012).
861. Heijmans BT, *et al.* A common variant of the methylenetetrahydrofolate reductase gene (1p36) is associated with an increased risk of cancer. *Cancer Res*

- 63**, 1249-1253 (2003).
862. Heikkilä K, *et al.* C-reactive protein-associated genetic variants and cancer risk: findings from FINRISK 1992, FINRISK 1997 and Health 2000 studies. *Eur J Cancer* **47**, 404-412 (2011).
863. Helmig S, Aliahmadi N, Schneider J. Tumour necrosis factor- $\alpha$  gene polymorphisms in asbestos-induced diseases. *Biomarkers* **15**, 400-409 (2010).
864. Helmig S, Belwe A, Schneider J. Association of transforming growth factor  $\beta$ 1 gene polymorphisms and asbestos-induced fibrosis and tumors. *J Investig Med* **57**, 655-661 (2009).
865. Helmig S, Grossmann M, Wubbeling J, Schneider J. Interleukin gene polymorphisms in pneumoconiosis. *Int J Mol Med* **30**, 401-408 (2012).
866. Hiraki A, *et al.* Different risk relations with smoking for non-small-cell lung cancer: comparison of TP53 and TP73 genotypes. *Asian Pac J Cancer Prev* **4**, 107-112 (2003).
867. Hirvonen A, Husgafvel-Pursiainen K, Anttila S, Karjalainen A, Sorsa M, Vainio H. Metabolic cytochrome P450 genotypes and assessment of individual susceptibility to lung cancer. *Pharmacogenetics* **2**, 259-263 (1992).
868. Hirvonen A, Husgafvel-Pursiainen K, Anttila S, Karjalainen A, Vainio H. The human CYP2E1 gene and lung cancer: DraI and RsaI restriction fragment length polymorphisms in a Finnish study population. *Carcinogenesis* **14**, 85-88 (1993).
869. Hirvonen A, Husgafvel-Pursiainen K, Anttila S, Karjalainen A, Vainio H. Polymorphism in CYP1A1 and CYP2D6 genes: possible association with susceptibility to lung cancer. *Environ Health Perspect* **101 Suppl 3**, 109-112 (1993).
870. Hirvonen A, Husgafvel-Pursiainen K, Anttila S, Vainio H. The GSTM1 null genotype as a potential risk modifier for squamous cell carcinoma of the lung. *Carcinogenesis* **14**, 1479-1481 (1993).
871. Hirvonen A, Husgafvel-Pursiainen K, Karjalainen A, Anttila S, Vainio H. Point-mutational MspI and Ile-Val polymorphisms closely linked in the CYP1A1 gene: lack of association with susceptibility to lung cancer in a Finnish study population. *Cancer Epidemiol Biomarkers Prev* **1**, 485-489 (1992).
872. Ho JC, *et al.* Manganese superoxide dismutase and catalase genetic polymorphisms, activity levels, and lung cancer risk in Chinese in Hong Kong. *J Thorac Oncol* **1**, 648-653 (2006).
873. Hong YS, Chang JH, Kwon OJ, Ham YA, Choi JH. Polymorphism of the CYP1A1 and glutathione-S-transferase gene in Korean lung cancer patients. *Exp Mol Med* **30**, 192-198 (1998).
874. Hong YS, *et al.* Association between microRNA196a2 rs11614913 genotypes and the risk of non-small cell lung cancer in Korean population. *J Prev Med Public Health* **44**, 125-130 (2011).
875. Honma HN, De Capitani EM, Barbeiro Ade S, Costa DB, Morcillo A, Zambon L. Polymorphism of the CYP1A1\*2A gene and susceptibility to lung cancer in a Brazilian population. *J Bras Pneumol* **35**, 767-772 (2009).
876. Honma HN, *et al.* Influence of p53 codon 72 exon 4, GSTM1, GSTT1 and GSTP1\*B polymorphisms in lung cancer risk in a Brazilian population. *Lung Cancer* **61**, 152-162 (2008).
877. Hou SM, *et al.* The XPD variant alleles are associated with increased aromatic DNA adduct level and lung cancer risk. *Carcinogenesis* **23**, 599-603 (2002).
878. Hou SM, Falt S, Nyberg F. Glutathione S-transferase T1-null genotype interacts synergistically with heavy smoking on lung cancer risk. *Environ Mol Mutagen*

- 38, 83-86 (2001).
879. Hou SM, *et al.* GSTM1 and NAT2 polymorphisms in operable and non-operable lung cancer patients. *Carcinogenesis* **21**, 49-54 (2000).
880. Hsia TC, *et al.* Genotype of DNA double-strand break repair gene XRCC7 is associated with lung cancer risk in Taiwan males and smokers. *Anticancer Res* **34**, 7001-7005 (2014).
881. Hsia TC, *et al.* Interleukin-10 (IL-10) promoter genotypes are associated with lung cancer risk in Taiwan males and smokers. *Anticancer Res* **34**, 7039-7044 (2014).
882. Hsia TC, *et al.* Association of DNA double-strand break gene XRCC6 genotypes and lung cancer in Taiwan. *Anticancer Res* **32**, 1015-1020 (2012).
883. Hsia TC, *et al.* Interaction of CCND1 genotype and smoking habit in Taiwan lung cancer patients. *Anticancer Res* **31**, 3601-3605 (2011).
884. Hsia TC, *et al.* Effects of ataxia telangiectasia mutated (ATM) genotypes and smoking habits on lung cancer risk in Taiwan. *Anticancer Res* **33**, 4067-4071 (2013).
885. Hsieh YS, *et al.* Association of EcoRI polymorphism of the metastasis-suppressor gene NME1 with susceptibility to and severity of non-small cell lung cancer. *Lung Cancer* **58**, 191-195 (2007).
886. Hsu NY, *et al.* Lung cancer susceptibility and genetic polymorphism of DNA repair gene XRCC4 in Taiwan. *Cancer Biomark* **5**, 159-165 (2009).
887. Hsu NY, *et al.* Lung cancer susceptibility and genetic polymorphisms of Exo1 gene in Taiwan. *Anticancer Res* **29**, 725-730 (2009).
888. Hu QY, *et al.* Genetic variation in the TP63 gene is associated with lung cancer risk in the Han population. *Tumour Biol* **35**, 1863-1866 (2014).
889. Hu Z, *et al.* Functional polymorphisms of matrix metalloproteinase-9 are associated with risk of occurrence and metastasis of lung cancer. *Clin Cancer Res* **11**, 5433-5439 (2005).
890. Hu Z, *et al.* Tagging single nucleotide polymorphisms in phosphoinositide-3-kinase-related protein kinase genes involved in DNA damage "checkpoints" and lung cancer susceptibility. *Clin Cancer Res* **14**, 2887-2891 (2008).
891. Hu Z, *et al.* Genetic variants in the MDM2 promoter and lung cancer risk in a Chinese population. *Int J Cancer* **118**, 1275-1278 (2006).
892. Hu Z, *et al.* A promoter polymorphism (-77T>C) of DNA repair gene XRCC1 is associated with risk of lung cancer in relation to tobacco smoking. *Pharmacogenet Genomics* **15**, 457-463 (2005).
893. Hu Z, *et al.* A common polymorphism in the 3'UTR of cyclooxygenase 2/prostaglandin synthase 2 gene and risk of lung cancer in a Chinese population. *Lung Cancer* **48**, 11-17 (2005).
894. Hu Z, *et al.* Polymorphisms in DNA damage binding protein 2 (DDB2) and susceptibility of primary lung cancer in the Chinese: a case-control study. *Carcinogenesis* **27**, 1475-1480 (2006).
895. Hu Z, *et al.* DNA repair gene XPC genotypes/haplotypes and risk of lung cancer in a Chinese population. *Int J Cancer* **115**, 478-483 (2005).
896. Hu Z, *et al.* Polymorphisms in the two helicases ERCC2/XPD and ERCC3/XPB of the transcription factor IIIH complex and risk of lung cancer: a case-control analysis in a Chinese population. *Cancer Epidemiol Biomarkers Prev* **15**, 1336-1340 (2006).
897. Huang B, *et al.* Functional genetic variants of c-Jun and their interaction with

- smoking and drinking increase the susceptibility to lung cancer in southern and eastern Chinese. *Int J Cancer* **131**, E744-758 (2012).
898. Yang L, *et al.* The polymorphisms and haplotypes of WWOX gene are associated with the risk of lung cancer in southern and eastern Chinese populations. *Mol Carcinog* **52 Suppl 1**, E19-27 (2013).
  899. Huijts PE, *et al.* CHEK2\*1100delC homozygosity in the Netherlands-prevalence and risk of breast and lung cancer. *Eur J Hum Genet* **22**, 46-51 (2014).
  900. Hung RJ, *et al.* Sequence variants in cell cycle control pathway, X-ray exposure, and lung cancer risk: a multicenter case-control study in Central Europe. *Cancer Res* **66**, 8280-8286 (2006).
  901. Hung RJ, *et al.* Large-scale investigation of base excision repair genetic polymorphisms and lung cancer risk in a multicenter study. *J Natl Cancer Inst* **97**, 567-576 (2005).
  902. Hussein AG, Pasha HF, El-Shahat HM, Gad DM, Toam MM. CYP1A1 gene polymorphisms and smoking status as modifier factors for lung cancer risk. *Gene* **541**, 26-30 (2014).
  903. Ihsan R, *et al.* Copy number polymorphism of glutathione-S-transferase genes (GSTM1 & GSTT1) in susceptibility to lung cancer in a high-risk population from north-east India. *Indian J Med Res* **139**, 720-729 (2014).
  904. Ihsan R, *et al.* Investigation on the role of p53 codon 72 polymorphism and interactions with tobacco, betel quid, and alcohol in susceptibility to cancers in a high-risk population from North East India. *DNA Cell Biol* **30**, 163-171 (2011).
  905. Irarrazabal CE, Rojas C, Aracena R, Marquez C, Gil L. Chilean pilot study on the risk of lung cancer associated with codon 72 polymorphism in the gene of protein p53. *Toxicol Lett* **144**, 69-76 (2003).
  906. Ishibe N, Wiencke JK, Zuo ZF, McMillan A, Spitz M, Kelsey KT. Susceptibility to lung cancer in light smokers associated with CYP1A1 polymorphisms in Mexican- and African-Americans. *Cancer Epidemiol Biomarkers Prev* **6**, 1075-1080 (1997).
  907. Islam MS, *et al.* Lung cancer risk in relation to nicotinic acetylcholine receptor, CYP2A6 and CYP1A1 genotypes in the Bangladeshi population. *Clin Chim Acta* **416**, 11-19 (2013).
  908. Islam MS, Mostofa AG, Ahmed MU, Bin Sayeed MS, Hassan MR, Hasnat A. Association of CYP3A4, CYP3A5 polymorphisms with lung cancer risk in Bangladeshi population. *Tumour Biol* **35**, 1671-1678 (2014).
  909. Ito H, *et al.* A limited association of OGG1 Ser326Cys polymorphism for adenocarcinoma of the lung. *J Epidemiol* **12**, 258-265 (2002).
  910. Ito H, *et al.* Gene-environment interactions between the smoking habit and polymorphisms in the DNA repair genes, APE1 Asp148Glu and XRCC1 Arg399Gln, in Japanese lung cancer risk. *Carcinogenesis* **25**, 1395-1401 (2004).
  911. Ito H, *et al.* Association between a genome-wide association study-identified locus and the risk of lung cancer in Japanese population. *J Thorac Oncol* **7**, 790-798 (2012).
  912. Iwao N, *et al.* No association of the mitochondrial genotype (Mt5178A/C) with six cancers in a Japanese population. *Asian Pac J Cancer Prev* **4**, 331-336 (2003).
  913. Jablonska E, Gromadzinska J, Sobala W, Reszka E, Wasowicz W. Lung cancer risk associated with selenium status is modified in smoking individuals by Sep15 polymorphism. *Eur J Nutr* **47**, 47-54 (2008).
  914. Jacobsen NR, *et al.* XRCC3 polymorphisms and risk of lung cancer. *Cancer Lett*

- 213**, 67-72 (2004).
915. Jacquet M, Lambert V, Baudoux E, Muller M, Kremers P, Gielen J. Correlation between P450 CYP1A1 inducibility, MspI genotype and lung cancer incidence. *Eur J Cancer* **32a**, 1701-1706 (1996).
  916. Jang JS, *et al.* Identification of polymorphisms in the Caspase-3 gene and their association with lung cancer risk. *Mol Carcinog* **47**, 383-390 (2008).
  917. Jang JS, *et al.* Polymorphisms in the survivin gene and the risk of lung cancer. *Lung Cancer* **60**, 31-39 (2008).
  918. Jang JS, *et al.* Methyl-CpG binding domain 1 gene polymorphisms and risk of primary lung cancer. *Cancer Epidemiol Biomarkers Prev* **14**, 2474-2480 (2005).
  919. Javid J, *et al.* Clinical and prognostic significance of promoter polymorphism (-31GC) of anti apoptotic gene Survivin (BIRC5) in North India patients with non small cell lung cancer. *J Cancer Sci Ther* **4**, 276-280 (2012).
  920. Javid J, *et al.* Impact of MDM2 SNP309T>G polymorphism: Increased risk of developing non small cell lung cancer and poor prognosis in indian patients. *J Cancer Sci Ther* **4**, 341-346 (2012).
  921. Javid J, *et al.* CC genotype of anti-apoptotic gene BCL-2 (null938 C/A) is an independent prognostic marker of unfavorable clinical outcome in patients with non-small-cell lung cancer. *Clin Transl Oncol* **17**, 289-295 (2015).
  922. Jaworowska E, *et al.* Smoking related cancers and loci at chromosomes 15q25, 5p15, 6p22.1 and 6p21.33 in the Polish population. *PLoS One* **6**, e25057 (2011).
  923. Jeon HS, *et al.* Relationship between XPG codon 1104 polymorphism and risk of primary lung cancer. *Carcinogenesis* **24**, 1677-1681 (2003).
  924. Jeon HS, *et al.* A common polymorphism in pre-microRNA-146a is associated with lung cancer risk in a Korean population. *Gene* **534**, 66-71 (2014).
  925. Ada AO, *et al.* Association between GSTM1, GSTT1, and GSTP1 polymorphisms and lung cancer risk in a Turkish population. *Mol Biol Rep* **39**, 5985-5993 (2012).
  926. Ada TG, Ada AO, Kunak SC, Alpar S, Gulhan M, Iscan M. Association between glutathione S-transferase omega 1 A140D polymorphism in the Turkish population and susceptibility to non-small cell lung cancer. *Arh Hig Rada Toksikol* **64**, 247-253 (2013).
  927. Adonis M, Martinez V, Marin P, Berrios D, Gil L. Smoking habit and genetic factors associated with lung cancer in a population highly exposed to arsenic. *Toxicol Lett* **159**, 32-37 (2005).
  928. Agachan B, *et al.* Apurinic/aprimidinic endonuclease (APE1) gene polymorphisms and lung cancer risk in relation to tobacco smoking. *Anticancer Res* **29**, 2417-2420 (2009).
  929. Yang X, *et al.* Association of the functional BCL-2 rs2279115 genetic variant and small cell lung cancer. *Tumour Biol*, (2015).
  930. Kurt H, *et al.* Determination of the Relationship Between rs4986790 and rs4986791 Variants of TLR4 Gene and Lung Cancer. *Inflammation*, (2015).
  931. Qiu ZX, Peng Y, Li WM. CD226 gene polymorphisms are associated with non-small-cell lung cancer in the Chinese han population. *Ther Clin Risk Manag* **11**, 1259-1264 (2015).
  932. Subhani S, Jamil K, Nirni SS. Association of MDR1 Gene (C3435T) Polymorphism and Gene Expression Profiling in Lung Cancer Patients Treated with Platinum-Based Chemotherapy. *Molecular Diagnosis and Therapy* **19**, 289-297 (2015).
  933. Gao F, *et al.* A regulatory MDM4 genetic variant locating in the binding



- sequence of multiple MicroRNAs contributes to susceptibility of small cell lung cancer. *PLoS One* **10**, (2015).
934. Hosono H, *et al.* CYP2A6 genetic polymorphism is associated with decreased susceptibility to squamous cell lung cancer in Japanese smokers. *Drug Metab Pharmacokinet* **30**, 263-268 (2015).
  935. Ozbayer C, *et al.* The role of NOD1/CARD4 and NOD2/CARD15 genetic variations in lung cancer risk. *Inflamm Res* **64**, 775-779 (2015).
  936. Pei N, *et al.* XAB2 tagSNPs contribute to non-small cell lung cancer susceptibility in Chinese population. *BMC Cancer* **15**, (2015).
  937. Liu HN, Su JL, Zhou SH, Liu LJ, Qie P. Cytotoxic T lymphocyte-associated antigen-4 +49A>G polymorphism and the risk of non-small cell lung cancer in a Chinese population. *Int J Clin Exp Med* **8**, 11519-11523 (2015).
  938. Zhou W, *et al.* CHRNA3 genetic polymorphism and the risk of lung cancer in the Chinese Han smoking population. *Tumour Biol* **36**, 4987-4992 (2015).
  939. Javid J, Mir R, Julka PK, Ray PC, Saxena A. Association of p53 and mdm2 in the development and progression of non-small cell lung cancer. *Tumour Biol* **36**, 5425-5432 (2015).
  940. Javid J, Mir R, Julka PK, Ray PC, Saxena A. Role of survivin re-expression in the development and progression of non-small cell lung cancer. *Tumour Biol* **36**, 5543-5550 (2015).
  941. Wang T, *et al.* Association of PSMA4 polymorphisms with lung cancer susceptibility and response to cisplatin-based chemotherapy in a Chinese Han population. *Clin Transl Oncol* **17**, 564-569 (2015).
  942. Dong Y, *et al.* Evaluating the association of eight polymorphisms with cancer susceptibility in a han Chinese population. *PLoS One* **10**, (2015).
  943. Chen HY, *et al.* R331W missense mutation of oncogene YAP1 is a germline risk allele for lung adenocarcinoma with medical actionability. *J Clin Oncol* **33**, 2303-2310 (2015).
  944. Chen HJ, *et al.* Contribution of Genotype of DNA Double-strand Break Repair Gene XRCC3, Gender, and Smoking Behavior to Lung Cancer Risk in Taiwan. *Anticancer Res* **35**, 3893-3899 (2015).
  945. Tian H, He X, Yin L, Guo WJ, Xia YY, Jiang ZX. Relationship between genetic polymorphisms of DNA ligase 1 and non-small cell lung cancer susceptibility and radiosensitivity. *Genet Mol Res* **14**, 7047-7052 (2015).
  946. Yin Z, *et al.* Interaction between polymorphisms in pre-miRNA genes and cooking oil fume exposure on the risk of lung cancer in Chinese non-smoking female population. *PLoS One* **10**, (2015).
  947. Wang Q, *et al.* The SNP rs931794 in 15q25.1 is associated with lung cancer risk: A hospital-based case-control study and meta-analysis. *PLoS One* **10**, (2015).
  948. Xiang C, *et al.* Pulmonary expression of CYP2A13 and ABCB1 is regulated by FOXA2, and Their genetic interaction is associated with lung cancer. *FASEB J* **29**, 1986-1998 (2015).
  949. Liu SG, Ma L, Cen QH, Huang JS, Zhang JX, Zhang JJ. Association of genetic polymorphisms in TERT-CLPTM1L with lung cancer in a chinese population. *Genet Mol Res* **14**, 4469-4476 (2015).
  950. Yang L, Wang J, Li FG, Han M, Chang XJ, Wang ZT. Relationship between genetic polymorphisms in MCP-1, CCR-2, and non-small-cell lung cancer in the Han nationality of Northern China. *Genet Mol Res* **14**, 3745-3752 (2015).
  951. Ren Y, *et al.* TGF $\beta$ -1 and TGFBR2 polymorphisms, cooking oil fume exposure and risk of lung adenocarcinoma in Chinese nonsmoking females: A case control

- study. *BMC Med Genet* **16**, (2015).
952. Eom SY, *et al.* Interactions between paraoxonase 1 genetic polymorphisms and smoking and their effects on oxidative stress and lung cancer risk in a Korean population. *PLoS One* **10**, (2015).
953. Ryan BM, *et al.* Identification of a functional SNP in the 3'UTR of CXCR2 that is associated with reduced risk of lung cancer. *Cancer Res* **75**, 566-575 (2015).
954. Zhang YM, Mao YM, Sun YX. Genetic polymorphisms of IL-6 and IL-10 genes correlate with lung cancer in never-smoking han population in China. *Int J Clin Exp Med* **8**, 1051-1058 (2015).
955. Zhao H, *et al.* FasL -844T/C and Fas -1377G/A: mutations of pulmonary adenocarcinoma in South China and their clinical significances. *Tumour Biol* **36**, 4319-4326 (2015).
956. Zhu DQ, Zou Q, Hu CH, Su JL, Zhou GH, Liu P. XRCC1 genetic polymorphism acts a potential biomarker for lung cancer. *Tumour Biol* **36**, 3745-3750 (2015).
957. Ebi H, *et al.* Lack of association between the BIM deletion polymorphism and the risk of lung cancer with and without EGFR mutations. *J Thorac Oncol* **10**, 59-66 (2015).
958. Chen KY, *et al.* Estrogen receptor gene polymorphisms and lung adenocarcinoma risk in never-smoking women. *J Thorac Oncol* **10**, 1413-1420 (2015).
959. Zheng M, *et al.* Potentially functional polymorphisms in PAK1 are associated with risk of lung cancer in a Chinese population. *Cancer Med*, (2015).
960. Kong J, *et al.* Genetic polymorphisms in the vitamin D pathway in relation to lung cancer risk and survival. *Oncotarget* **6**, 2573-2582 (2015).
961. Su WM, *et al.* Single nucleotide polymorphisms in VTI1A gene contribute to the susceptibility of Chinese population to non-small cell lung cancer. *Int J Biol Markers* **30**, e286-e293 (2015).
962. Wang Y, Ren B, Zhang L, Guo Z. Correlation between metabolic enzyme GSTP1 polymorphisms and susceptibility to lung cancer. *Exp Ther Med* **10**, 1521-1527 (2015).
963. Yoo SS, *et al.* Putative functional variants of XRCC1 identified by RegulomeDB were not associated with lung cancer risk in a Korean population. *Cancer Genet* **208**, 19-24 (2015).
964. Modesto JL, *et al.* NNK reduction pathway gene polymorphisms and risk of lung cancer. *Mol Carcinog* **54**, E94-E102 (2015).
965. Ma QY, Chen J, Wang SH, Wu N, Hao ZH, Chen XF. Interleukin 17A genetic variations and susceptibility to non-small cell lung cancer. *APMIS* **123**, 194-198 (2015).
966. Shen W, *et al.* Polymorphisms in alternative splicing associated genes are associated with lung cancer risk in a Chinese population. *Lung Cancer* **89**, 238-242 (2015).
967. Yin J, *et al.* NFKB1 common variants and PPP1R13L and CD3EAP in relation to lung cancer risk in a Chinese population. *Gene* **567**, 31-35 (2015).
968. Wang H, Li Y, Yu W, Ma L, Ji X, Xiao W. Expression of the receptor for advanced glycation end-products and frequency of polymorphism in lung cancer. *Oncol Lett* **10**, 51-60 (2015).
969. Gately K, *et al.* Mutational analysis of the insulin-like growth factor 1 receptor tyrosine kinase domain in non-small cell lung cancer patients. *Mol Clin Oncol* **3**, 1073-1079 (2015).
970. Wang Y, Jiang W, Liu X, Zhang Y. Tankyrase 2 (TNKS2) polymorphism

- associated with risk in developing non-small cell lung cancer in a Chinese population. *Pathol Res Pract* **211**, 766-771 (2015).
971. Li X, *et al.* The interaction of APEX1 variant with polycyclic aromatic hydrocarbons on increasing chromosome damage and lung cancer risk among male Chinese. *Mol Carcinog* **54**, E103-E111 (2015).
972. Gansmo LB, Knappskog S, Hveem K, Vatten L, Lønning PE. Influence of MDM2 SNP309 and SNP285 status on the risk of cancer in the breast, prostate, lung and colon. *Int J Cancer* **137**, 96-103 (2015).
973. Sodhi KK, Bahl C, Singh N, Behera D, Sharma S. Functional genetic variants in pre-MIR-146a and 196a2 genes are associated with risk of lung cancer in North Indians. *Future Oncol* **11**, 2159-2173 (2015).
974. Javid J, *et al.* CC genotype of anti-apoptotic gene BCL-2 (-938 C/A) is an independent prognostic marker of unfavorable clinical outcome in patients with non-small-cell lung cancer. *Clin Transl Oncol* **17**, 289-295 (2015).
975. Wang Y, Ni J, Sun Z, Chen S, Jiao Y, Bai C. The influence of XRCC1 genetic variants on lung cancer susceptibility in Chinese Han population. *Gene* **556**, 127-131 (2015).
976. Liu Y, Qing H, Su X, Wang C, Li Z, Liu S. Association of CD44 gene polymorphism with survival of NSCLC and risk of bone metastasis. *Med Sci Monit* **21**, 2694-2700 (2015).
977. Zhang S, *et al.* Polymorphisms in C-reactive protein and glypican-5 are associated with lung cancer risk and gartrokin-1 influences cisplatin-based chemotherapy response in a Chinese Han population. *Dis Markers* **2015**, (2015).
978. Rafrafi A, *et al.* CCR2-64I polymorphism is associated with Non-Small Cell Lung Cancer in Tunisian patients. *Hum Immunol* **76**, 348-354 (2015).
979. Kowal A, Wiśniewski A, Kuśnierczyk P, Jankowska R. Human leukocyte antigen (HLA)-G gene polymorphism in patients with non-small cell lung cancer. *Thoracic Cancer* **6**, 613-619 (2015).
980. Cheng S, *et al.* Interleukin 17A polymorphism elevates gene expression and is associated with increased risk of nonsmall cell lung cancer. *DNA Cell Biol* **34**, 63-68 (2015).
981. Dimitrakopoulos FID, *et al.* Variant of BCL3 gene is strongly associated with five-year survival of non-small-cell lung cancer patients. *Lung Cancer* **89**, 311-319 (2015).
982. He Y, *et al.* IL-17A and IL-17F single nucleotide polymorphisms associated with lung cancer in Chinese population. *Clin Respir J*, (2015).
983. Liu C, Zhou X, Gao F, Qi Z, Zhang Z, Guo Y. Correlation of genetic polymorphism of vascular endothelial growth factor gene with susceptibility to lung cancer. *Cancer Gene Ther* **22**, 312-316 (2015).
984. Subhani S, Jamil K, Atilli S. Association of CYP3A4\*1B and CYP3A5\*3 Genetic Polymorphisms with Lung Cancer and its Impact on Taxane Metabolism in Indian Population. *Acta Medica International* **2**, 19-27 (2015).
985. Sevilya Z, *et al.* Development of APE1 enzymatic DNA repair assays: Low APE1 activity is associated with increase lung cancer risk. *Carcinogenesis* **36**, 982-991 (2015).
986. Wang SS, Zhu XQ, Yang SD, Dong LL, Li W, Tang J. Association of p73 G4C14-to-A4T14 polymorphism with non-small cell lung cancer risk. *Oncol Lett* **10**, 995-999 (2015).
987. Ture M, *et al.* Investigation of FGFR4 (Gly388Arg) gene polymorphism in

- primary lung cancer patients. *Int J Hum Genet* **15**, 7-12 (2015).
988. Bhat IA, *et al.* Significant impact of IL-6-174G/C but inverse relation with-634 C/G polymorphism in patients with non-small cell lung cancer in kashmiri population. *Immunol Invest* **44**, 349-360 (2015).
989. Wang Y, Chen L, Pan L, Xue J, Yu H. The association between NFKB1-94ins/del ATTG polymorphism and non-small cell lung cancer risk in a Chinese Han population. *Int J Clin Exp Med* **8**, 8153-8157 (2015).
990. Wiśniewski A, *et al.* Genetic polymorphisms and expression of HLA-G and its receptors, KIR2DL4 and LILRB1, in non-small cell lung cancer. *Tissue Antigens* **85**, 466-475 (2015).
991. Cho EN, *et al.* BCL2-like 11 intron 2 deletion polymorphism is not associated with non-small cell lung cancer risk and prognosis. *Lung Cancer* **90**, 106-110 (2015).
992. Li Y, *et al.* IL1B gene polymorphisms, age and the risk of non-small cell lung cancer in a Chinese population. *Lung Cancer* **89**, 232-237 (2015).
993. Fazlzadeh Haghighi M, Ghayumi MA, Behzadnia F, Erfani N. Investigation of FOXP3 genetic variations at positions -2383 C/T and IVS9+459 T/C in southern iranian patients with lung carcinoma. *Iran J Basic Med Sci* **18**, 465-471 (2015).
994. Yin L, Guo H, Zhao L, Wang J. The programmed death-1 gene polymorphism (PD-1.5 C/T) is associated with non-small cell lung cancer risk in a chinese han population. *Int J Clin Exp Med* **7**, 5832-5836 (2014).
995. Liu J, Wang X, Ren Y, Li X, Zhang X, Zhou B. Effect of single nucleotide polymorphism Rs189037 in ATM gene on risk of lung cancer in Chinese: A case-control study. *PLoS One* **9**, (2014).
996. Liang Y, *et al.* Correlation of CLPTM1L polymorphisms with lung cancer susceptibility and response to cisplatin-based chemotherapy in a Chinese Han population. *Tumour Biol* **35**, 12075-12082 (2014).
997. Uppal V, Mehndiratta M, Mohapatra D, Grover RK, Puri D. XRCC-1 gene polymorphism (Arg399Gln) and susceptibility to development of lung cancer in cohort of north indian population: A pilot study. *J Clin Diagn Res* **8**, CC17-CC20 (2014).
998. Zhang L, *et al.* A functional polymorphism in the 3'-UTR of PXR Interacts with smoking to increase lung cancer risk in Southern and Eastern Chinese smoker. *Int J Mol Sci* **15**, 17457-17468 (2014).
999. Chen X, *et al.* RECK gene polymorphisms influence NSCLC susceptibility, but not the chemotherapy response status in Chinese cohort. *Cell Biochem Biophys* **69**, 567-571 (2014).
1000. Tian G, Wang M, Xu X. The role of NQO1 polymorphisms in the susceptibility and chemotherapy response of Chinese NSCLC patients. *Cell Biochem Biophys* **69**, 475-479 (2014).
1001. Gu JD, Hua F, Mei CR, Zheng DJ, Wang GF, Zhou QH. HapMap-based study on the association between MPO and GSTP1 gene polymorphisms and lung cancer susceptibility in Chinese Han population. *Acta Pharmacol Sin* **35**, 636-644 (2014).
1002. Wang SS, *et al.* Association between a p73 gene polymorphism and genetic susceptibility to non-small cell lung cancer in the South of China. *Asian Pac J Cancer Prev* **15**, 10387-10391 (2014).
1003. Luo X, *et al.* Genetic variant in CLPTM1L confers reduced risk of lung cancer: a replication study in Chinese and a meta-analysis. *Asian Pac J Cancer Prev* **15**, 9241-9247 (2014).

1004. Robles AI, *et al.* A DRD1 polymorphism predisposes to lung cancer among those exposed to secondhand smoke during childhood. *Chest* **146**, 1210-1218 (2014).
1005. Saikia BJ, *et al.* Association of a p53 codon 72 gene polymorphism with environmental factors and risk of lung cancer: a case control study in Mizoram and Manipur, a high incidence region in North East India. *Asian Pac J Cancer Prev* **15**, 10653-10658 (2014).
1006. Jiang XY, Chang FH, Bai TY, Lv XL, Wang MJ. Susceptibility of lung cancer with polymorphisms of CYP1A1, GSTM1, GSTM3, GSTT1 and GSTP1 genotypes in the population of Inner Mongolia region. *Asian Pac J Cancer Prev* **15**, 5207-5214 (2014).
1007. Lu DY, *et al.* RTN4 3'-UTR insertion/deletion polymorphism and susceptibility to non-small cell lung cancer in Chinese Han population. *Asian Pac J Cancer Prev* **15**, 5249-5252 (2014).
1008. Kang HG, *et al.* A functional polymorphism in CSF1R gene is a novel susceptibility marker for lung cancer among never-smoking females. *J Thorac Oncol* **9**, 1647-1655 (2014).
1009. Iwamoto S, *et al.* Association of EPAS1 gene rs4953354 polymorphism with susceptibility to lung adenocarcinoma in female Japanese non-smokers. *J Thorac Oncol* **9**, 1709-1713 (2014).
1010. Kaabachi W, *et al.* Association of vitamin D receptor FokI and ApaI polymorphisms with lung cancer risk in Tunisian population. *Mol Biol Rep* **41**, 6545-6553 (2014).
1011. Nasir Uddin MM, *et al.* Genetic polymorphisms of GSTM1, GSTP1 and GSTT1 genes and lung cancer susceptibility in the Bangladeshi population. *Asian Pac J Trop Biomed* **4**, 982-989 (2014).
1012. Phukan RK, Borah PK, Saikia BJ, Das M, Sekhon GS, Mahanta J. Interaction of tobacco smoking and chewing with Angiotensin converting enzyme (insertion/deletion) gene polymorphisms and risk of lung cancer in a high risk area from northeast India. *Asian Pac J Cancer Prev* **15**, 10691-10695 (2014).
1013. Zhang JW, *et al.* Association of CYP2E1 and NAT2 polymorphisms with lung cancer susceptibility among Mongolian and Han populations in the Inner Mongolian region. *Asian Pac J Cancer Prev* **15**, 9203-9210 (2014).
1014. Phukan RK, Saikia BJ, Borah PK, Zomawia E, Sekhon GS, Mahanta J. Role of household exposure, dietary habits and glutathione S-Transferases M1, T1 polymorphisms in susceptibility to lung cancer among women in Mizoram India. *Asian Pac J Cancer Prev* **15**, 3253-3260 (2014).
1015. Xun X, *et al.* CLPTM1L genetic polymorphisms and interaction with smoking and alcohol drinking in lung cancer risk: A case-control study in the Han population from Northwest China. *Medicine* **93**, e289 (2014).
1016. Cavic M, *et al.* The influence of methylenetetrahydrofolate reductase and thymidylate synthetase gene polymorphisms on lung adenocarcinoma occurrence. *J BUON* **19**, 1024-1028 (2014).
1017. Lou G, Zhang Y, Bao W, Deng D. Association between polymorphisms in CHRNA3 and PHACTR2 gene and environment and NSCLC risk in Chinese population. *Acta Biochim Pol* **61**, 765-768 (2014).
1018. Shukla RK, *et al.* Associations of CYP1A1, GSTM1 and GSTT1 polymorphisms with lung cancer susceptibility in a Northern Indian population. *Asian Pac J Cancer Prev* **14**, 3345-3349 (2013).
